# Supplementary material for: Divergent Proteomic Responses Offer Insights into Resistant Physiological Responses of a Reef-Foraminifera to Climate Change Scenarios
Source: MDPI journal article supplement (doi:10.3390/oceans2020017), 2021-04-01
Supplement: s1 [file s1]

Supplementary materials

# Divergent Proteomic Responses Offer Insights into Resistant Physiological Responses of a Reef-Foraminifera to Climate Change Scenarios

Marleen Stuhr <sup>1,2,3,\*</sup>, Louise P. Cameron <sup>3,4</sup>, Bernhard Blank-Landeshammer <sup>5</sup>, Claire E. Reymond <sup>3</sup>, Steve S. Doo <sup>3</sup>, Hildegard Westphal <sup>3,6</sup>, Albert Sickmann <sup>5,7,8</sup> and Justin B. Ries <sup>3,4</sup>

<sup>1</sup> Interuniversity Institute for Marine Sciences, Eilat 8810302, Israel

<sup>2</sup> The Mina and Everard Goodman Faculty of Life Sciences, Bar-Ilan University, Ramat Gan 52900, Israel

<sup>3</sup> Leibniz Centre for Tropical Marine Research (ZMT), 28359 Bremen, Germany; cameron.lo@northeastern.edu (L.P.C.); claire.reymond@gmail.com (C.E.R.); steve.doo@leibniz-zmt.de (S.S.D.); hildegard.westphal@leibniz-zmt.de (H.W.); j.ries@northeastern.edu (J.B.R.)

<sup>4</sup> Department of Marine and Environmental Sciences, Marine Science Center, Northeastern University, Boston, MA 01908, USA

<sup>5</sup> Leibniz Institut für Analytische Wissenschaften-ISAS-e.V., 44139 Dortmund, Germany; bernhard.blank@mailbox.org (B.B.-L.); sickmann@isas.de (A.S.)

<sup>6</sup> Department of Geosciences, Bremen University, 28359 Bremen, Germany

<sup>7</sup> Medizinische Fakultät, Medizinische Proteom-Center (MPC), Ruhr-Universität Bochum, 44801 Bochum, Germany

<sup>8</sup> Department of Chemistry, University of Aberdeen, Old Aberdeen, AB24 3UE, Scotland, UK

\* Correspondence: [marleen.stuhr@leibniz-zmt.de](mailto:marleen.stuhr@leibniz-zmt.de)

## Supplementary Materials:

Figure S1: Phylogenetic assignment of photosymbionts

Figure S2: Heatmap of differentially abundant proteins per sample

Figure S3: Heatmap of differentially abundant proteins in photosymbionts

Figure S4: Heatmap of differentially abundant proteins of the host foraminifera

Figure S5: Principal component analysis of differentially abundant proteins in a) photosymbionts and b) foraminiferal host including GO term summaries

Figure S6: Principal component analysis of differentially abundant proteins in a) photosymbionts and b) foraminiferal host including protein descriptions

Figure S7: Number of up- and down-regulated proteins comparing all treatments

Figure S8: Bar plots showing the number of gene ontology term hits of (a)  $p\text{CO}_2$ - and (b) temperature-regulated proteins

Table S1: Additional data for mean chemical conditions

Table S2: Results of nominal logistic models for the frequencies of test breakage and mortality

Table S3: Kruskal-Wallis non-parametric results for DBL  $\Delta[\text{H}^+]$

Table S4: Results of two-factorial analysis of variance (ANOVA) of the measured physiological parameters

Table S5: List of all proteins detected

Table S6: List of normalized abundances values and  $\log_2\text{FC}$  of all differentially abundant proteins

Table S7: Number of DAPs in between treatments

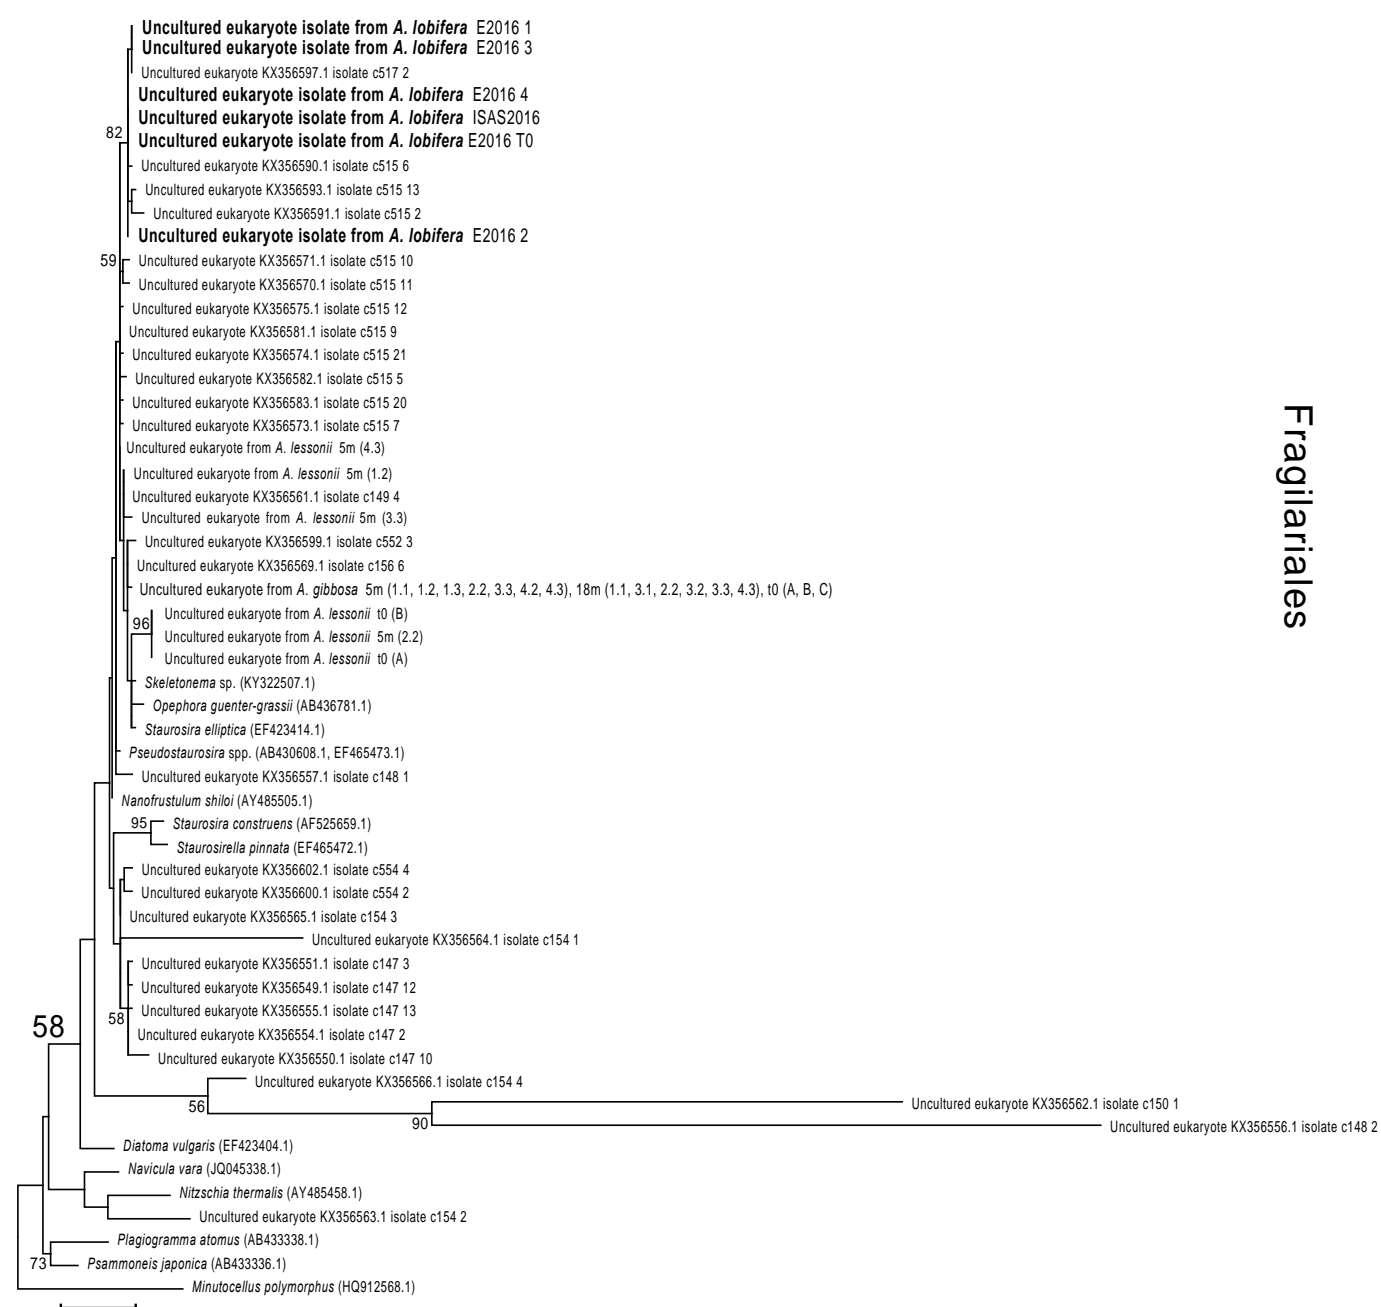

**Figure S1.** Phylogenetic assignment of photosymbionts from *Amphistegina lobifera* from the Red Sea, sampled at the Inter-University Institute (IUI) for Marine Sciences in Eilat, Israel, at about 3 m depth, as well as reference symbiont sequences from *A. lobifera* from Schmidt et al. (2016, labelled 'Uncultured eukaryote KX3565x', [1]). Additionally, *A. gibbosa* and *A. lessonii* photosymbiont sequences from Stuhr et al. (2018) [2] and sequences of diatoms formerly described from large benthic foraminifera together with the other closely related algae as identified by BLAST searches completed the dataset. Bootstrap support above 50% is given at the respective nodes of the maximum-likelihood tree. All recovered symbiont sequences were found within the Fragilariiales with a bootstrap support of 58%.

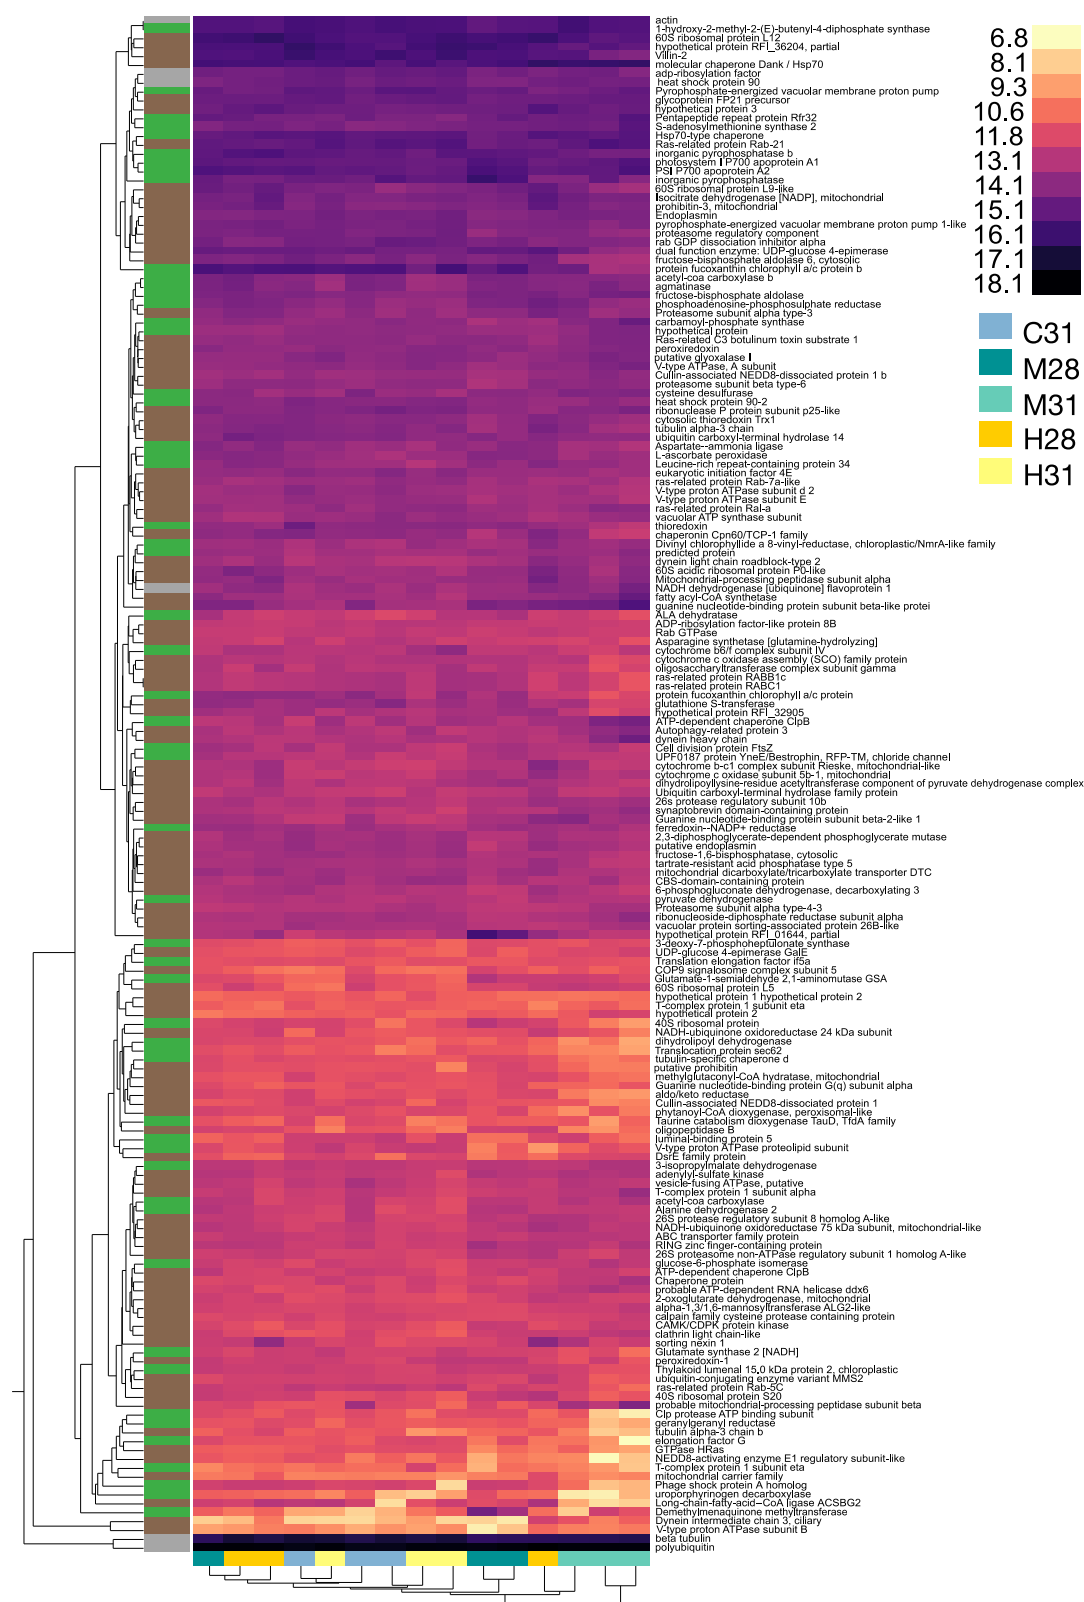

**Figure S2.** Heatmap of differentially abundant proteins in *Amphistegina lobifera* and their photosymbionts in response to treatments of elevated  $p\text{CO}_2$  (C = 492 ppm, M = 963 ppm, H = 3182 ppm) at 28 °C or 31 °C, where rows represent differentially abundant protein (n = 173) and columns represent biological replicates (n = 3 per treatment). Proteins and replicates are clustered using average linkage of log-transformed protein abundance values. Bars on the left show whether the protein was associated to: host = brown, photosymbionts = green, or both = grey.

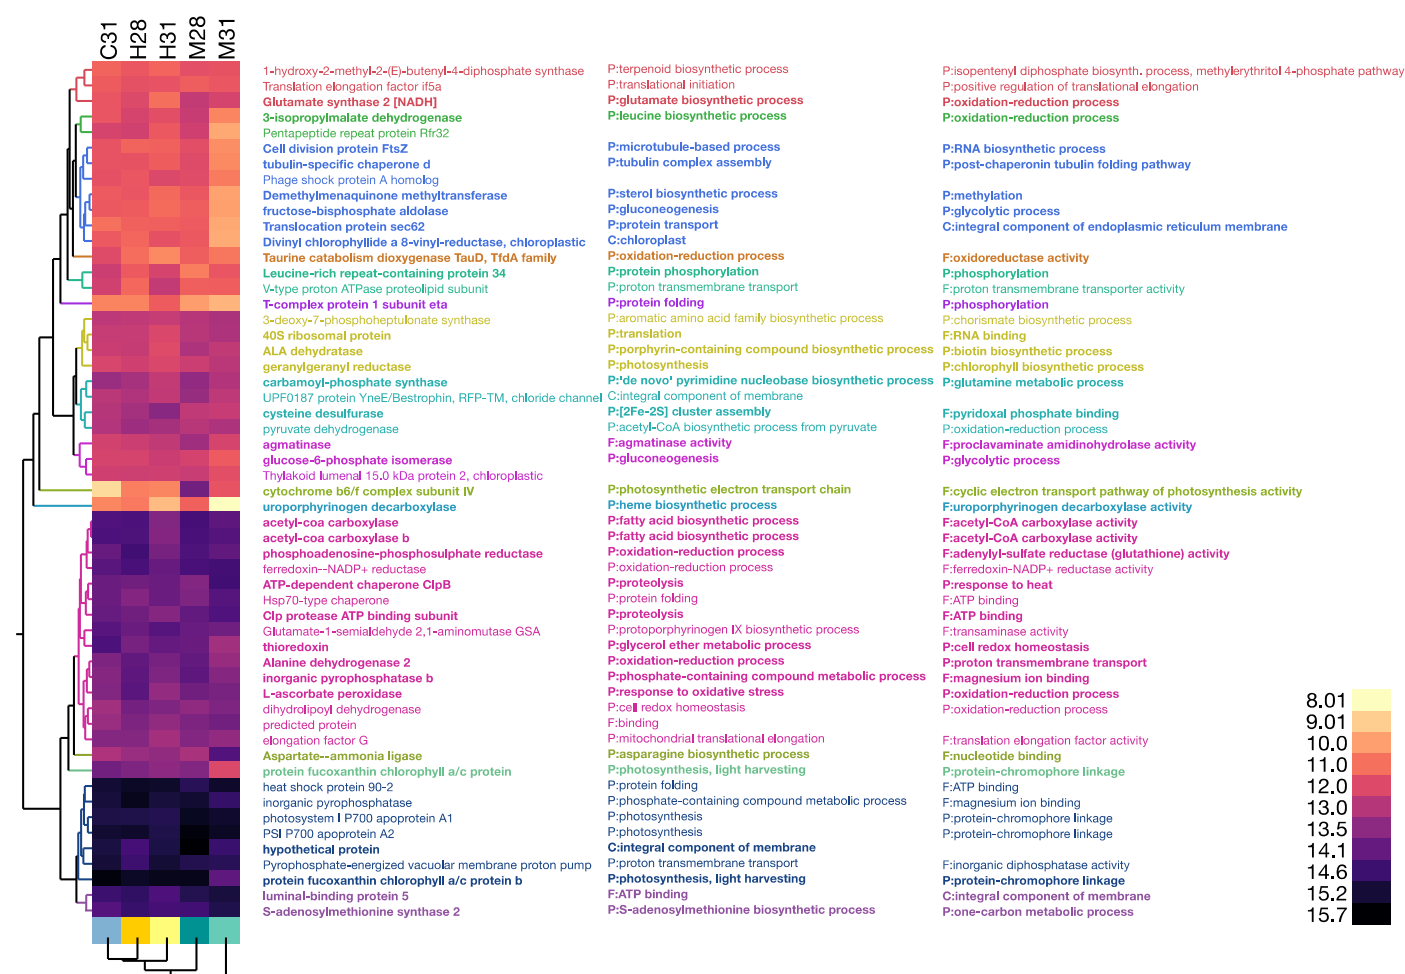

**Figure S3.** Heatmap of differentially abundant proteins in photosymbionts of *Amphistegina lobifera* in response to treatments of elevated  $p\text{CO}_2$  (C = 492 ppm, M = 963 ppm, H = 3182 ppm) at 28 °C or 31 °C, where rows represent differentially abundant proteins, for which the first two GO terms given, and columns represent the log-transformed average of three replicates per treatments. Average protein abundances were log-transformed and clustered using average linkage. Bold proteins were strongest regulated (GLM,  $q \leq 0.05$ , Tukeys'  $p \leq 0.05$ , and  $\log_2\text{FC} \geq 11$ ).

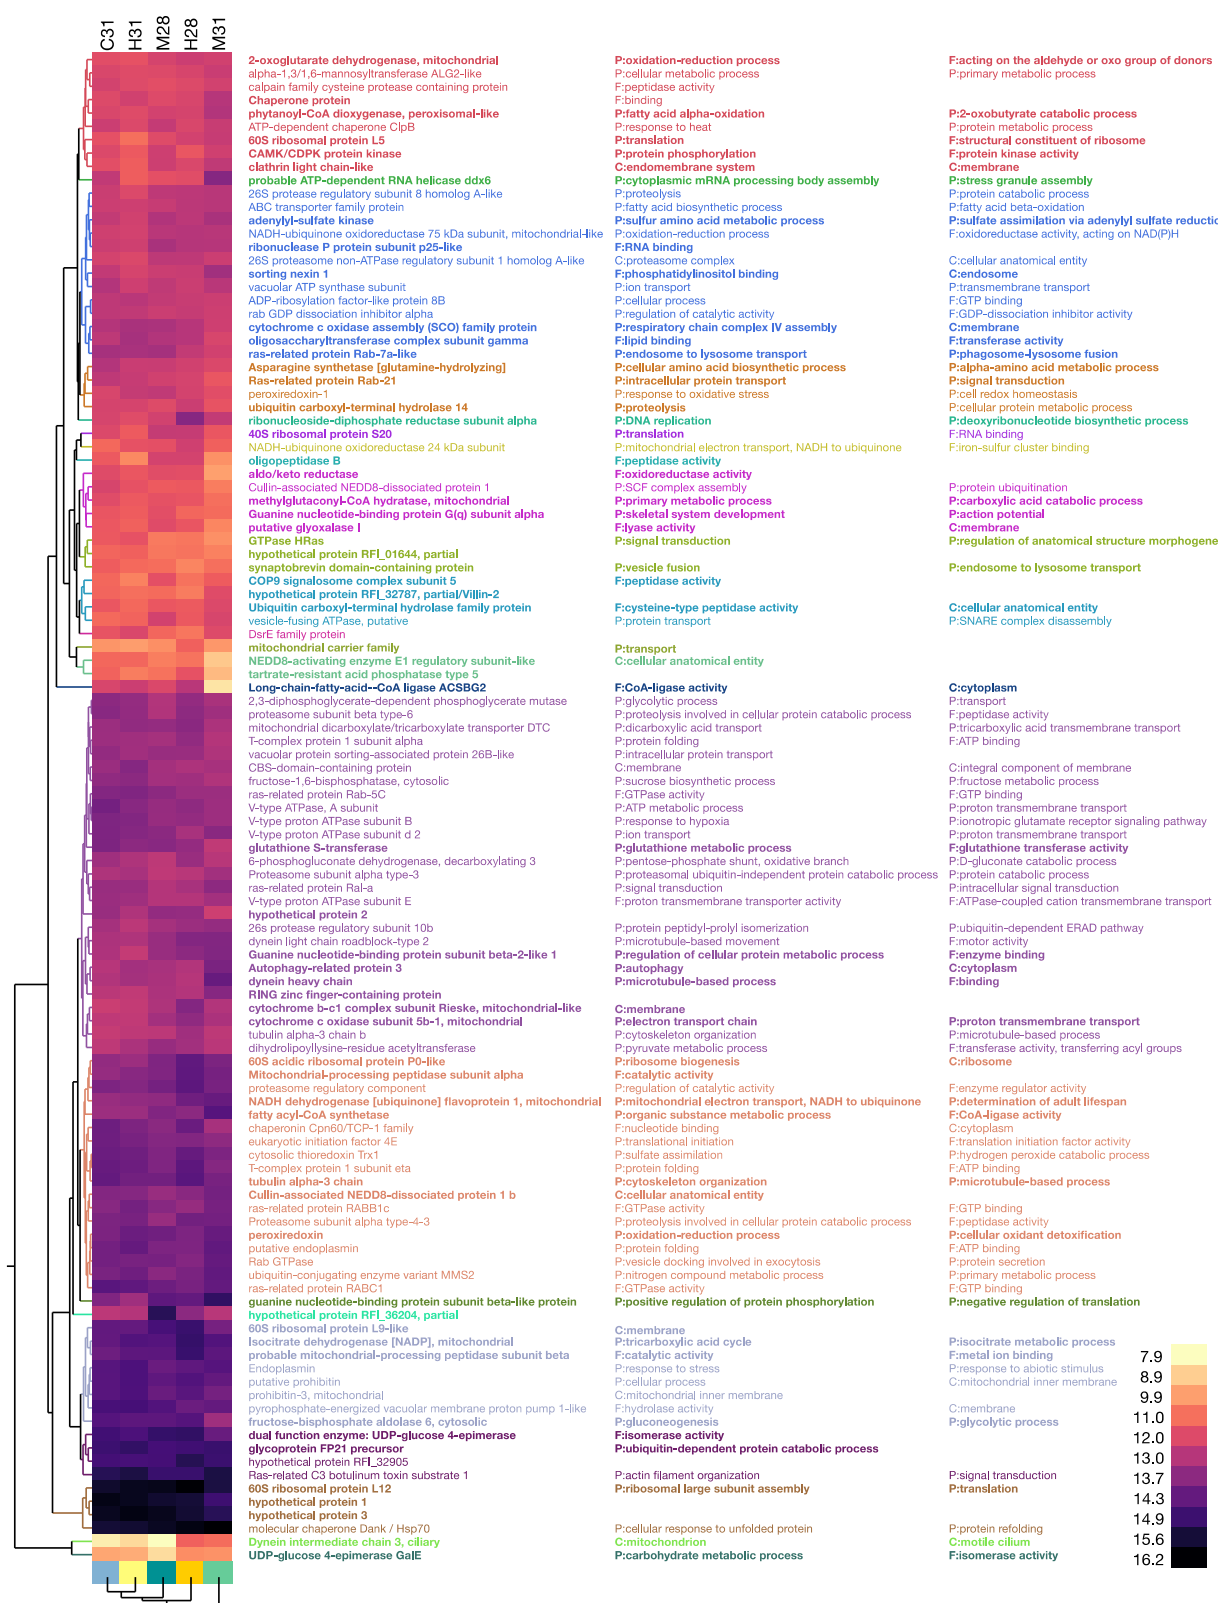

**Figure S4.** Heatmap of differentially abundant proteins of the host foraminifera *Amphistegina lobifera* in response to treatments of elevated  $p\text{CO}_2$  (C = 492 ppm, M = 963 ppm, H = 3182 ppm) at 28 °C or 31 °C, where rows represent differentially abundant proteins, for which the first two GO terms are given, and columns represent the log-transformed average of three replicates per treatments. Average protein abundances were log-transformed and clustered using average linkage. Bold proteins were strongest regulated (GLM,  $q \leq 0.05$ , Tukeys'  $p \leq 0.05$ , and  $\log_2\text{FC} \geq 11$ ).

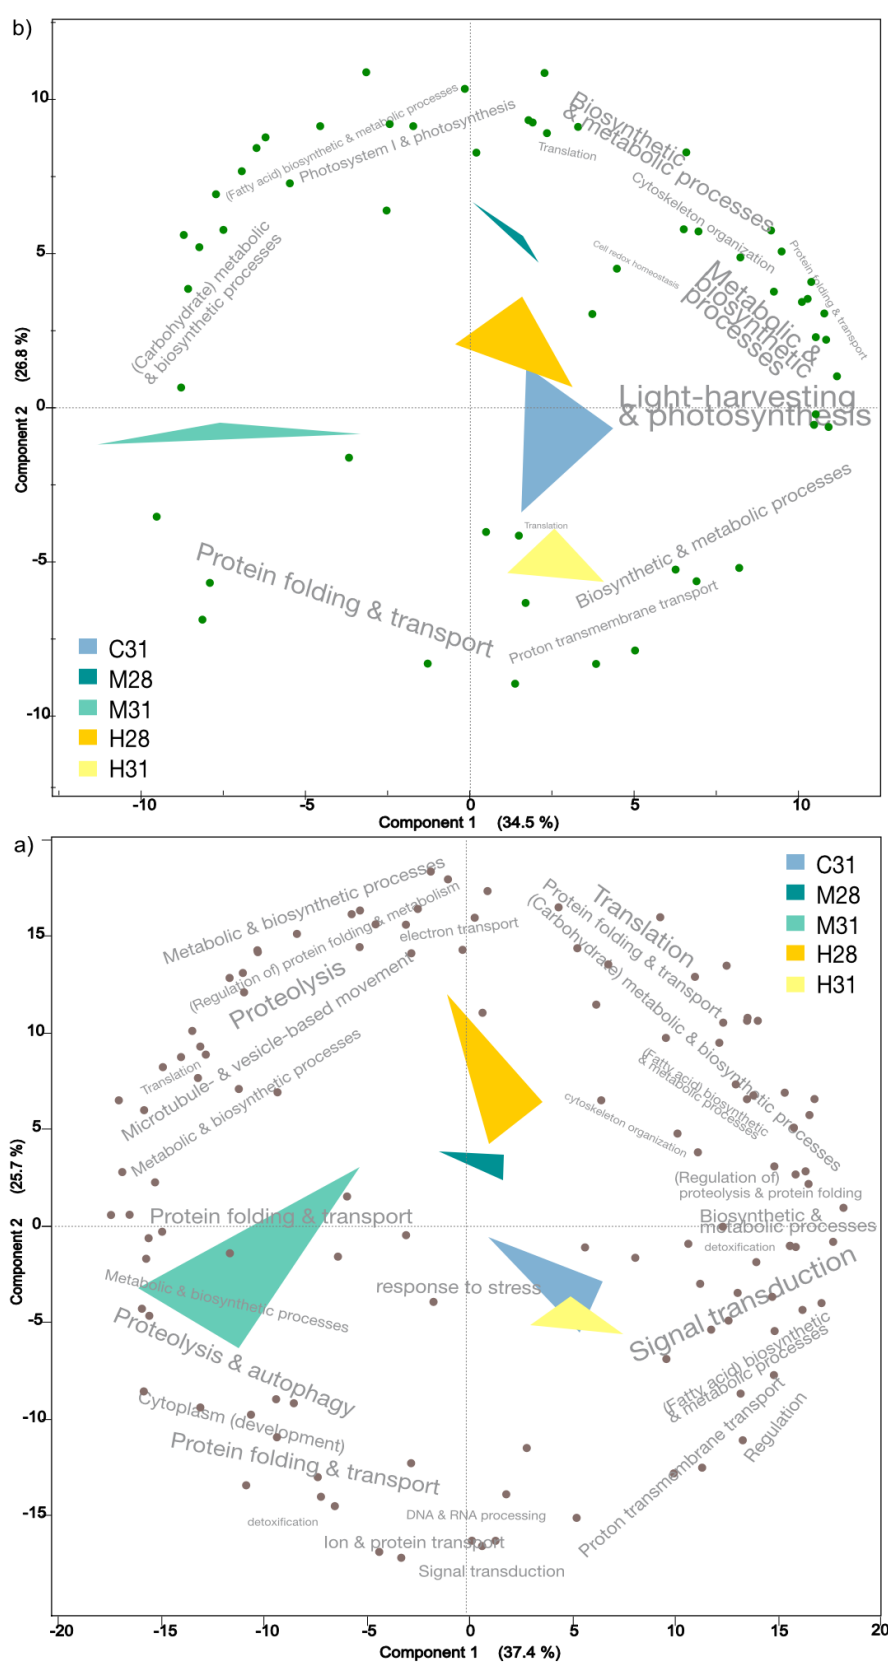



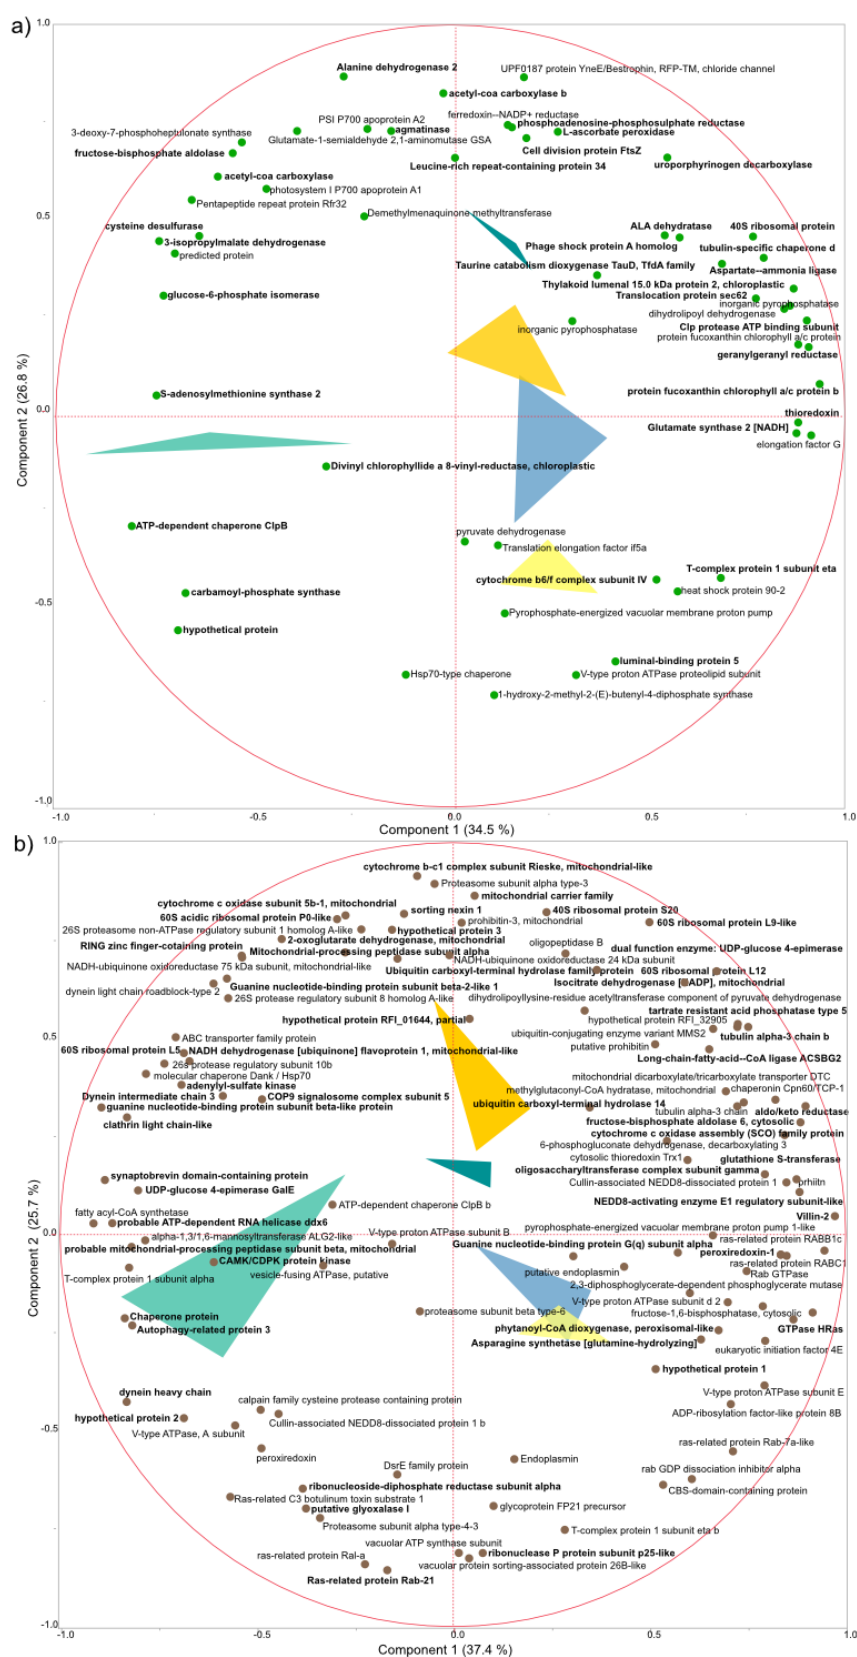

**Figure S6.** Principal component analysis biplot of differentially abundant proteins in (a) photosymbionts and (b) foraminiferal host of *Amphistegina lobifera* in response to treatments of elevated  $p\text{CO}_2$  (C = 492 ppm, M = 963 ppm, H = 3182 ppm) at 28 °C or 31 °C (legend as in Figure S5). Corners of triangles indicate triplicate samples of the treatments, dots indicate proteins with descriptions as variables. Bold proteins were strongest regulated (GLM,  $q \leq 0.05$ , Tukeys'  $p \leq 0.05$ , and  $\log_2\text{FC} \geq 1$ ).

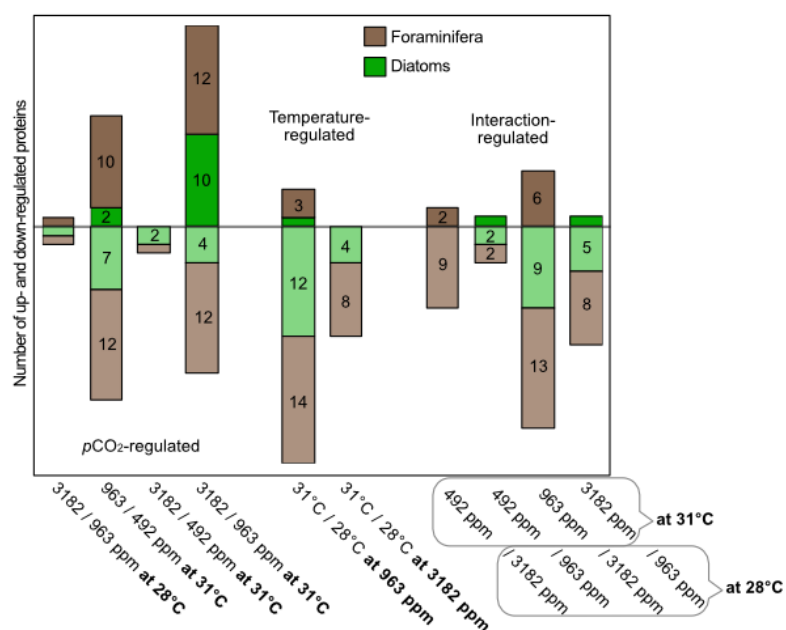

**Figure S7.** Number of regulated proteins (i.e. DAP with Tukeys'  $p \leq 0.05$  and  $\log_2FC \geq |1|$ ) in *A. lobifera* hosts (brown) and symbionts (green), which were either significantly up- or downregulated (Tables 3, 4 and S6), comparing all treatments with each other. Contrasts are shown by groups of main effects of pCO<sub>2</sub>, temperature or both.



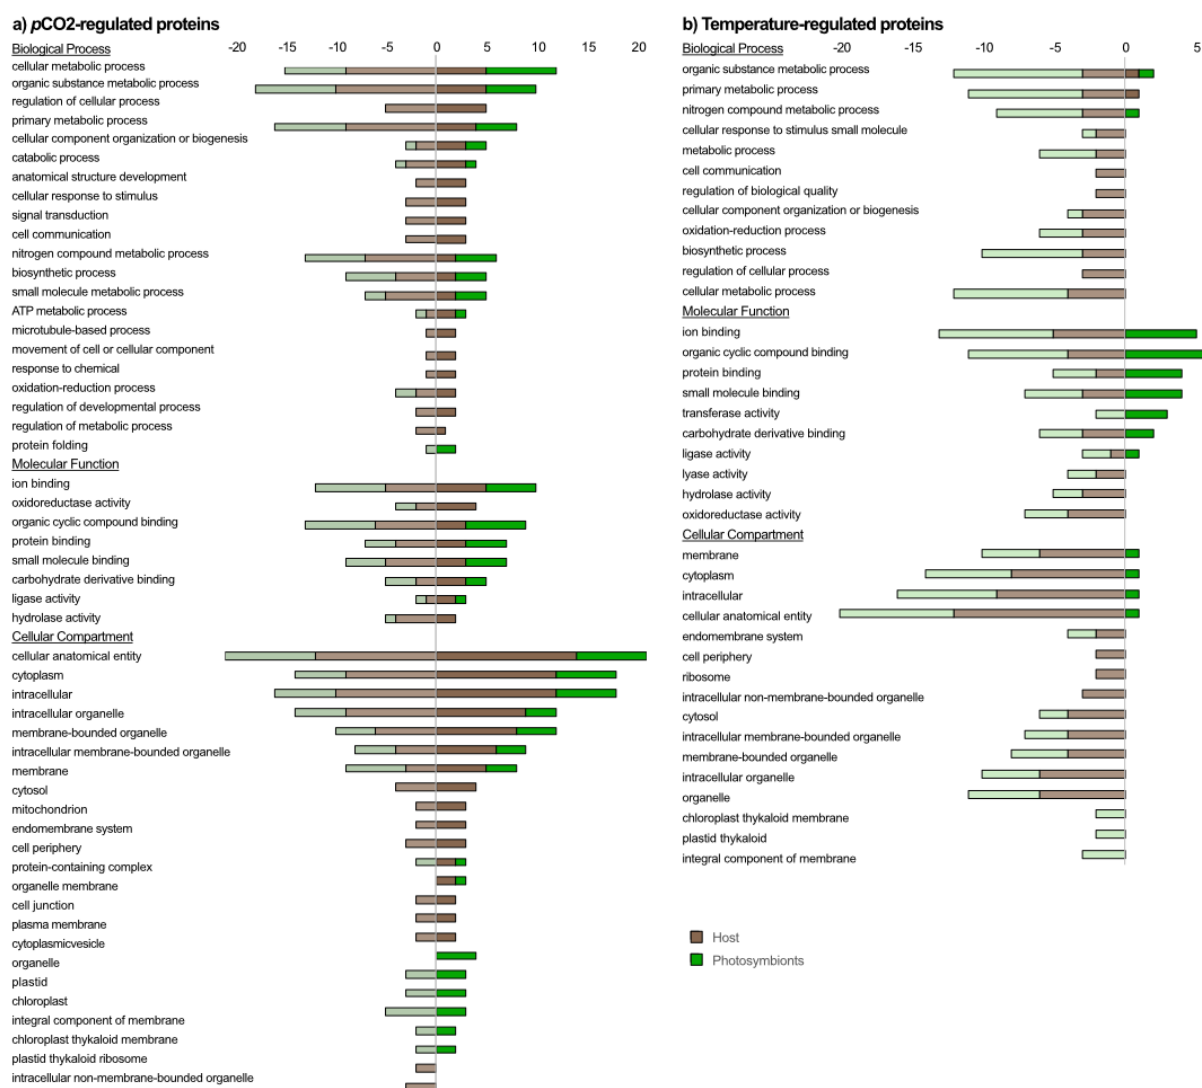

**Figure S8.** Bar plots showing the number of gene ontology term hits of solely (a) pCO<sub>2</sub>- and (b) temperature-regulated proteins (Figure S7) in *Amphistegina lobifera* host foraminifera (red) and photosymbiotic diatoms (purple) grouped by 3rd level GO terms for biological process, molecular functions and cellular components for selected categories with ≥2 hits (Tables 3, 4 and S6).

**Table S1.** Additional data for mean chemical conditions with standard deviations of treatments of elevated pCO<sub>2</sub> (C = 492 ppm, M = 963 ppm, H = 3182 ppm) crossed with 28 °C and 31 °C over the eight-week experiment. Salinity (Sal) and pH on NBS scale (pH<sub>NBS</sub>) in each of the replicate tanks (n = 4). Carbonate system parameters (carbonate ion concentration = [CO<sub>3</sub><sup>2-</sup>], bicarbonate ion concentration = [HCO<sub>3</sub><sup>-</sup>], dissolved CO<sub>2</sub> = [CO<sub>2</sub>]<sub>sw</sub>) were calculated from weekly measurement of TA, DIC, salinity, and temperature (n = 8).

| Treatment | Sal (psu)    | pH <sub>NBS</sub> | [CO <sub>3</sub> <sup>2-</sup> ] (μM) | [HCO <sub>3</sub> <sup>-</sup> ] (μM) | [CO <sub>2</sub> ] <sub>sw</sub> (μM) |
|-----------|--------------|-------------------|---------------------------------------|---------------------------------------|---------------------------------------|
| C28       | 35.05 ± 0.69 | 8.27 ± 0.10       | 340 ± 72                              | 2133 ± 179                            | 13 ± 2                                |
| C31       | 35.75 ± 0.73 | 8.24 ± 0.08       | 294 ± 71                              | 2042 ± 231                            | 12 ± 1                                |
| M28       | 35.54 ± 0.56 | 8.04 ± 0.10       | 232 ± 120                             | 2394 ± 291                            | 26 ± 4                                |
| M31       | 35.98 ± 0.59 | 8.12 ± 0.10       | 262 ± 39                              | 2480 ± 170                            | 23 ± 3                                |
| H28       | 35.79 ± 0.52 | 7.63 ± 0.11       | 88 ± 22                               | 2703 ± 426                            | 80 ± 21                               |
| H31       | 35.76 ± 0.6  | 7.69 ± 0.10       | 112 ± 29                              | 3040 ± 280                            | 85 ± 21                               |

**Table S2.** Results of nominal logistic models for the frequencies of test breakage and mortality (empty tests) on *Amphistegina lobifera* exposed to elevated  $p\text{CO}_2$  (C = 492 ppm, M = 963 ppm, H = 3182 ppm) crossed with temperature (Temp.) of 28 °C and 31 °C for eight weeks. Bold values indicate significant effects ( $p \leq 0.05$ ). Marginally significant variations between (groups of) treatments are indicated in grey ( $0.07 > p\text{-value} > 0.05$ ).

| Parameter | Effect                             | DF | $\chi^2$ | $p\text{-value}$ |
|-----------|------------------------------------|----|----------|------------------|
| Mortality | Temp.                              | 1  | 0.503    | 0.478            |
|           | $p\text{CO}_2$                     | 2  | 0.606    | 0.739            |
|           | $p\text{CO}_2 \times \text{Temp.}$ | 2  | 3.982    | 0.136            |
| Breakage  | Temp.                              | 1  | 0.557    | 0.456            |
|           | $p\text{CO}_2$                     | 2  | 0.988    | 0.610            |
|           | $p\text{CO}_2 \times \text{Temp.}$ | 2  | 5.575    | <b>0.062</b>     |

**Table S3.** Permutational multivariate analysis results for  $\Delta[\text{H}^+]$  between seawater and the test surface of *Amphistegina lobifera* for the fixed effects of  $p\text{CO}_2$  (C = 492 ppm, M = 963 ppm, H = 3182 ppm) and temperature (Temp., 28 °C, 31 °C), or light/dark condition (left side), with bold values indicating significant effects ( $p \leq 0.05$ ); and significant adjusted  $p$ -values of pairwise comparison of all  $\Delta[\text{H}^+]$  at and FDR of 0.1.

| Effect                             | DF | MS        | F      | Pr(>F)       | Contrasting treatment combinations |           | $p\text{-adj.}$ |
|------------------------------------|----|-----------|--------|--------------|------------------------------------|-----------|-----------------|
| $p\text{CO}_2$                     | 2  | 5.033e31  | 6.952  | <b>0.003</b> | H31 light                          | M31 dark  | 0.0017          |
| Temp.                              | 1  | 1.339e30  | 0.185  | 0.664        | H31 light                          | C31 dark  | 0.0017          |
| $p\text{CO}_2 \times \text{Temp.}$ | 1  | -5.211e29 | -0.072 | 0.422        | H31 light                          | C28 dark  | 0.0017          |
| Light/dark                         | 1  | 2.82e32   | 5.207  | <b>0.021</b> | H31 light                          | C31 light | 0.0017          |
|                                    |    |           |        |              | H31 light                          | M31 light | 0.0066          |
|                                    |    |           |        |              | H31 light                          | C28 light | 0.0066          |
|                                    |    |           |        |              | H31 light                          | H28 dark  | 0.0066          |
|                                    |    |           |        |              | H31 light                          | M28 light | 0.0066          |
|                                    |    |           |        |              | H31 light                          | H31 dark  | 0.0117          |
|                                    |    |           |        |              | H31 light                          | M28 dark  | 0.0165          |
|                                    |    |           |        |              | H31 light                          | H28 light | 0.0618          |
|                                    |    |           |        |              | H28 light                          | M31 dark  | 0.0957          |

**Table S4.** Results of two-factorial analysis of variance (ANOVA) of the measured physiological parameters of *Amphistegina lobifera* and its photosymbionts exposed to elevated  $p\text{CO}_2$  (C = 492 ppm, M = 963 ppm, H = 3182 ppm) crossed with temperature (Temp.) of 28 °C and 31 °C for eight weeks. Bold values indicate significant effects ( $p \leq 0.05$ ). For significant effects, the analysis was followed by Tukeys' HSD post-hoc test for comparison of differences. Respective  $p$ -values of significant post-hoc results are given in brackets. Only marginally significant variations between (groups of) treatments are indicated in grey ( $0.07 > p\text{-value} > 0.05$ ).

| Parameter    | Effect                             | DF | MS     | F-ratio | $p\text{-value}$ | post-hoc test summary |
|--------------|------------------------------------|----|--------|---------|------------------|-----------------------|
| Chl <i>a</i> | Temp.                              | 1  | 0.017  | 0.630   | 0.438            |                       |
|              | $p\text{CO}_2$                     | 2  | 0.001  | 0.050   | 0.951            |                       |
|              | $p\text{CO}_2 \times \text{Temp.}$ | 2  | 0.000  | 0.015   | 0.985            |                       |
| <i>L</i> *   | Temp.                              | 1  | 3.896  | 0.094   | 0.763            |                       |
|              | $p\text{CO}_2$                     | 2  | 2.443  | 0.059   | 0.943            |                       |
|              | $p\text{CO}_2 \times \text{Temp.}$ | 2  | 49.191 | 1.183   | 0.329            |                       |
| <i>a</i> *   | Temp.                              | 1  | 5.802  | 0.542   | 0.471            |                       |
|              | $p\text{CO}_2$                     | 2  | 4.555  | 0.425   | 0.660            |                       |
|              | $p\text{CO}_2 \times \text{Temp.}$ | 2  | 2.738  | 0.256   | 0.777            |                       |
| <i>b</i> *   | Temp.                              | 1  | 0.683  | 0.096   | 0.760            |                       |
|              | $p\text{CO}_2$                     | 2  | 27.530 | 3.867   | <b>0.040</b>     | C > H (0.053)         |
|              | $p\text{CO}_2 \times \text{Temp.}$ | 2  | 9.043  | 1.270   | 0.305            |                       |
| Growth rate  | Temp.                              | 1  | 0.008  | 5.029   | <b>0.038</b>     | 28 > 31 (0.038)       |
|              | $p\text{CO}_2$                     | 2  | 0.002  | 1.200   | 0.324            |                       |
|              | $p\text{CO}_2 \times \text{Temp.}$ | 2  | 0.003  | 1.928   | 0.174            |                       |

|           |                                    |   |        |       |              |                                |
|-----------|------------------------------------|---|--------|-------|--------------|--------------------------------|
| Pore size | Temp.                              | 1 | 0.951  | 0.375 | 0.542        |                                |
|           | $p\text{CO}_2$                     | 2 | 5.820  | 2.295 | 0.108        |                                |
|           | $p\text{CO}_2 \times \text{Temp.}$ | 2 | 11.396 | 4.493 | <b>0.015</b> | C31 > M31 (0.030), H31 (0.040) |

**Tables S5** and **S6** are provided as Excel file in the electronic supplementary materials.

**Table S7.** Number of DAPs in *Amphistegina lobifera* between two treatments of elevated  $p\text{CO}_2$  (C = 492 ppm, M = 963 ppm, H = 3182 ppm) at 28°C and 31°C, without the control treatment C28. Values in the upper right half (white, 193 in total) represent host-associated proteins and values in the lower left half (grey, 97 in total) represent symbiont-associated proteins. Nine DAPs were assigned to both compartments and are indicated as subscript <sup>+</sup>x next to photosymbiont DAPs. Respective protein descriptions with annotated gene ontologies are provided in Table S6.

|     | C31              | M28              | M31              | H28             | H31 |
|-----|------------------|------------------|------------------|-----------------|-----|
| C31 |                  | 10               | 32               | 17              | 1   |
| M28 | 5 <sup>+1</sup>  |                  | 28               | 8               | 15  |
| M31 | 11 <sup>+1</sup> | 19 <sup>+1</sup> |                  | 30              | 32  |
| H28 | 5 <sup>+1</sup>  | 3 <sup>+1</sup>  | 11 <sup>+1</sup> |                 | 20  |
| H31 | 5 <sup>+1</sup>  | 14 <sup>+2</sup> | 18 <sup>+1</sup> | 6 <sup>+0</sup> |     |

## Reference

- Schmidt, C.; Morard, R.; Prazeres, M.; Barak, H.; Kucera, M. Retention of high thermal tolerance in the invasive foraminifera *Amphistegina lobifera* from the Eastern Mediterranean and the Gulf of Aqaba. *Mar. Biol.* **2016**, *163*, 228.
- Stuhr, M.; Meyer, A.; Reymond, C.E.; Narayan, G.R.; Rieder, V.; Rahnenführer, J.; Kucera, M.; Westphal, H.; Muhando, C.A.; Hallock, P. Variable thermal stress tolerance of the reef-associated symbiont-bearing foraminifera *Amphistegina* linked to differences in symbiont type. *Coral Reefs* **2018**, *37*, 811–824.
