# Supplementary material for: Divergent Proteomic Responses Offer Insights into Resistant Physiological Responses of a Reef-Foraminifera to Climate Change Scenarios
Source: MDPI journal article supplement (doi:10.3390/oceans2020017), 2021-04-01
Supplement: s1 [file s1]

Archive with 3 entries (2 files):
- oceans-1079807 supplementary online/
- oceans-1079807 supplementary online/oceans-1079807 supplementary Figures and Tables online.pdf
- oceans-1079807 supplementary online/oceans-1079807 supplementary Tables S5 & S6 online.xlsx
