# Supplementary material for: Divergent Proteomic Responses Offer Insights into Resistant Physiological Responses of a Reef-Foraminifera to Climate Change Scenarios
Source: MDPI journal article supplement (doi:10.3390/oceans2020017), 2021-04-01
Supplement: s1 [file s1 › oceans-1079807 supplementary online/oceans-1079807 supplementary Tables S5 & S6 online.xlsx]

## Sheet: S5) all identified proteins 
Supplementary Material
Divergent proteomic responses offer insights into resistant physiological responses of a reef-foraminifera to climate change scenarios
Stuhr M*, L Cameron, B Blank-Landeshammer, CE Reymond, H Westphal, A Sickmann, JB Ries
Correspondence: Marleen Stuhr: stuhr.marleen@gmail.com
Table S5. List of all proteins detected in all treatments and replicates of A. lobifera from Eilat, Gulf of Aqaba, their homology-based results with BLAST descriptions from our concatenated foraminifera and diatom sequence databases, average normalized abundances in the different treatments of the exposure to the combined and individual stressors of pCO2 level (492 ppm = C, 963 ppm = M and 3182 p…
							Normalized abundance values
Accession(s)	Organism	Cluster	Unique peptides	Description	Preferred_name	eggNOG description	C28_1	M28_1	M28_2	M28_3	H28_1	H28_3	H28_4	C31_1	C31_2	C31_4	M31_4	M31_2	M31_3	H31_3	H31_2	H31_1	Query	Seed ortholog	e-value	score	best tax lvl	GO terms	EC number	KEGG KO	KEGG pathway	KEGG module	KEGG reaction	KEGG rclass	BRITE	KEGG TC	CAZy	BiGG reaction	annot lvl	matching OGs	Best OG	COG cat
g|tr|g1003634.t1	Foraminifera	1114	3	GloG15_CONTIG768916:222-563(+)			1.00363e+07	6.72704e+06	9.43989e+06	7.15107e+06	6.56536e+06	6.59562e+06	4.96573e+06	1.14863e+07	4.86792e+06	6.18555e+06	5.1706e+06	3.73793e+06	3.38025e+06	8.04061e+06	1.00305e+07	8.56419e+06
g|tr|g1005675.t1	Foraminifera	1118	6	GloG15_CONTIG771789:1-329(+)	HSPA5	ATP binding	6.08168e+06	6.35789e+06	3.994e+06	5.76114e+06	6.1797e+06	7.82099e+06	8.81803e+06	8.4335e+06	6.20467e+06	7.82828e+06	7.59787e+06	2.46307e+06	7.50688e+06	6.26155e+06	7.34808e+06	7.56081e+06	>g|tr|g1005675.t1	227086.JGI_V11_88281	4e-16	90.9	Eukaryota	GO:0000003,GO:0000082,GO:0000166,GO:0000271,GO:0000278,GO:0000323,GO:0000741,GO:0000742,GO:0000746,GO:0000747,GO:0000974,GO:0001085,GO:0001655,GO:0001664,GO:0001822,GO:0001910,GO:0001912,GO:0001914,GO:0001916,GO:0001917,GO:0002682,GO:0002684,GO:0002697,GO:0002699,GO:0002703,GO:0002705,GO:0002706,GO:0002708,GO:0002709,GO:0002711,GO:0002819,GO:0002821,GO:0002822,GO:0002824,GO:0003008,GO:0003674,GO:…		ko:K09490	ko03060,ko04141,ko04918,ko05020,map03060,map04141,map04918,map05020				ko00000,ko00001,ko03110,ko04131,ko04147	1.A.33			Eukaryota	COG0443@1,KOG0100@2759	NA|NA|NA	O
g|tr|g1036893.t1	Foraminifera	1072	2	GloG15_CONTIG815880:204-623(+)			106536	85426.8	28908.8	80003.2	211459	75085.2	60274	127253	78892.7	110004	26007.7	80948.8	99359.6	63887.3	29317.6	95170.1
g|tr|g1042099.t1	Foraminifera	1053	3	GloG15_CONTIG823354:1-441(-)	HTS1	WHEP-TRS domain	48594.2	142506	164970	177905	100838	97941.8	159590	130770	113707	114563	98420.9	50644.2	185231	193132	71789.7	100285	>g|tr|g1042099.t1	5286.M7XZN3	1.2e-20	106.3	Pucciniomycotina	GO:0000166,GO:0002181,GO:0003674,GO:0003676,GO:0003723,GO:0003729,GO:0003824,GO:0004812,GO:0004821,GO:0005488,GO:0005524,GO:0005575,GO:0005622,GO:0005623,GO:0005737,GO:0005739,GO:0006082,GO:0006139,GO:0006399,GO:0006412,GO:0006418,GO:0006427,GO:0006518,GO:0006520,GO:0006725,GO:0006807,GO:0008144,GO:0008150,GO:0008152,GO:0009058,GO:0009059,GO:0009987,GO:0010467,GO:0016070,GO:0016874,GO:0016875,GO:…	6.1.1.21	ko:K01892	ko00970,map00970	M00359,M00360	R03655	RC00055,RC00523	ko00000,ko00001,ko00002,ko01000,ko01007,ko03016				Fungi	2YCNA@29000,38DB2@33154,3NVF4@4751,3UZXH@5204,COG0124@1,KOG1936@2759	NA|NA|NA	J
g|tr|g1072171.t1	Foraminifera	1027	2	GloG15_CONTIG867765:1-206,290-548(-)		PPIases accelerate the folding of proteins. It catalyzes the cis-trans isomerization of proline imidic peptide bonds in oligopeptides	338315	754597	457568	608788	406817	441041	523703	373445	332129	539533	178206	965747	552041	451769	424972	779258	>g|tr|g1072171.t1	2711.XP_006486318.1	6e-34	150.6	Streptophyta		5.2.1.8	ko:K01802					ko00000,ko01000				Viridiplantae	37MAX@33090,3GGHC@35493,COG0652@1,KOG0865@2759	NA|NA|NA	O
g|tr|g1076010.t1	Foraminifera	1138	1	GloG15_CONTIG873479:200-235,301-401,467-598(+)	RAP2C	member of RAS oncogene family	158506	114240	95747.3	124797	74548.3	98046.6	56679.1	155524	188323	143834	98222.7	0	105390	190677	195518	153500	>g|tr|g1076010.t1	6412.HelroP154062	2.2e-12	78.2	Bilateria	GO:0000166,GO:0000287,GO:0001775,GO:0001882,GO:0001883,GO:0001885,GO:0001932,GO:0001934,GO:0002064,GO:0002252,GO:0002263,GO:0002274,GO:0002275,GO:0002283,GO:0002366,GO:0002376,GO:0002443,GO:0002444,GO:0002446,GO:0003158,GO:0003674,GO:0003712,GO:0003713,GO:0003824,GO:0003924,GO:0005488,GO:0005515,GO:0005525,GO:0005575,GO:0005576,GO:0005615,GO:0005622,GO:0005623,GO:0005737,GO:0005768,GO:0005829,GO:…		ko:K07837,ko:K07838,ko:K07839	ko04530,map04530				ko00000,ko00001,ko04031,ko04147				Metazoa	38G01@33154,3BF22@33208,3CVIQ@33213,COG1100@1,KOG0395@2759	NA|NA|NA	S
g|tr|g1091126.t1	Foraminifera	990	9	GloG15_CONTIG896197:1-508(-)	CLTC	Clathrin is the major protein of the polyhedral coat of coated pits and vesicles	624430	996054	909378	999469	732053	945846	940723	887099	1.2787e+06	1.2864e+06	529997	586553	1.32175e+06	958061	804481	1.05978e+06	>g|tr|g1091126.t1	44689.DDB0185029	1.2e-51	209.5	Amoebozoa	GO:0000003,GO:0000041,GO:0000139,GO:0000226,GO:0000278,GO:0000280,GO:0000281,GO:0000323,GO:0000578,GO:0000910,GO:0000912,GO:0000915,GO:0001505,GO:0001654,GO:0001745,GO:0002020,GO:0002376,GO:0002478,GO:0002495,GO:0002504,GO:0003002,GO:0003006,GO:0003674,GO:0003676,GO:0003723,GO:0003725,GO:0005102,GO:0005198,GO:0005488,GO:0005515,GO:0005575,GO:0005622,GO:0005623,GO:0005694,GO:0005737,GO:0005739,GO:…		ko:K04646	ko04142,ko04144,ko04721,ko04961,ko05016,ko05100,map04142,map04144,map04721,map04961,map05016,map05100				ko00000,ko00001,ko04131,ko04147				Eukaryota	3X8BV@554915,KOG0985@1,KOG0985@2759	NA|NA|NA	U
g|tr|g1100690.t1	Foraminifera	982	2	GloG15_CONTIG910517:1-256,319-584(+)	PCCA	carboxylase, alpha	635628	1.30547e+06	245361	864717	788903	757199	896632	705547	857783	752638	484906	114107	820526	509562	605003	706021	>g|tr|g1100690.t1	7955.ENSDARP00000117212	1.2e-35	156.4	Actinopterygii	GO:0003674,GO:0003824,GO:0004658,GO:0005488,GO:0005515,GO:0005575,GO:0005622,GO:0005623,GO:0005737,GO:0005739,GO:0005759,GO:0005829,GO:0006082,GO:0006520,GO:0006629,GO:0006631,GO:0006732,GO:0006766,GO:0006767,GO:0006768,GO:0006790,GO:0006807,GO:0008144,GO:0008150,GO:0008152,GO:0009056,GO:0009062,GO:0009063,GO:0009374,GO:0009987,GO:0016042,GO:0016054,GO:0016421,GO:0016874,GO:0016885,GO:0017144,GO:…	6.4.1.3	ko:K01965,ko:K06235	ko00280,ko00630,ko00640,ko01100,ko01120,ko01130,ko01200,map00280,map00630,map00640,map01100,map01120,map01130,map01200	M00373,M00741	R01859	RC00097,RC00609	ko00000,ko00001,ko00002,ko01000,ko03000				Metazoa	38B7N@33154,3B9PR@33208,3D08X@33213,489UZ@7711,48UVS@7742,4A1GF@7898,COG4770@1,KOG0238@2759	NA|NA|NA	EI
g|tr|g1117577.t1	Foraminifera	1144	1	GloG15_CONTIG936498:280-351,417-574(-)		phosphatidylinositol-3-phosphate binding	193279	858988	433540	651328	671324	604936	682607	679309	518705	700616	333369	393073	741303	696769	517163	578229	>g|tr|g1117577.t1	227086.JGI_V11_52584	2.5e-09	67.8	Eukaryota	GO:0003674,GO:0005488,GO:0005543,GO:0008289,GO:0032266,GO:0035091,GO:0043167,GO:0043168,GO:1901981											Eukaryota	29TN5@1,2RXGP@2759	NA|NA|NA	S
g|tr|g1146139.t1	Foraminifera	1135	1	GloG15_CONTIG981157:1-93,148-315,468-480(-)		lactoylglutathione lyase activity	123903	150898	135136	181151	113253	109723	112585	119882	100273	94022.5	27995.2	28820.4	49867	117081	23207.4	101606	>g|tr|g1146139.t1	529818.AMSG_04007T0	5.1e-17	93.6	Eukaryota		4.4.1.5	ko:K01759	ko00620,map00620		R02530	RC00004,RC00740	ko00000,ko00001,ko01000				Eukaryota	COG0346@1,KOG2944@2759	NA|NA|NA	E
g|tr|g1159670.t1	Foraminifera	1087	5	GloG15_CONTIG1002631:39-86,152-293,347-552(+)	MAS2	Mitochondrial processing peptidase	679848	1.14339e+06	606330	870040	997055	2.21019e+06	3.20144e+06	689336	698765	845805	384580	289342	1.54685e+06	416475	1.02958e+06	1.10593e+06	>g|tr|g1159670.t1	984962.XP_009541085.1	1.5e-09	69.3	Agaricomycetes incertae sedis	GO:0003674,GO:0003824,GO:0004175,GO:0004222,GO:0005488,GO:0005575,GO:0005622,GO:0005623,GO:0005737,GO:0005739,GO:0005740,GO:0005743,GO:0005759,GO:0006508,GO:0006605,GO:0006626,GO:0006627,GO:0006807,GO:0006810,GO:0006839,GO:0006886,GO:0006996,GO:0007005,GO:0008104,GO:0008150,GO:0008152,GO:0008233,GO:0008237,GO:0008270,GO:0009987,GO:0010467,GO:0015031,GO:0015833,GO:0016020,GO:0016043,GO:0016485,GO:…	3.4.24.64	ko:K01412					ko00000,ko01000,ko01002,ko03029				Fungi	227CA@155619,38BUY@33154,3H0DK@355688,3NV1J@4751,3UYW5@5204,COG0612@1,KOG2067@2759	NA|NA|NA	O
g|tr|g1160409.t1	Foraminifera	1095	1	GloG15_CONTIG1003861:1-184,250-438,539-551(+)			127168	194523	13595.9	52595.7	161569	100882	84710.2	130718	166453	209513	21192.9	4890.96	166465	96583.8	29610.5	146975
g|tr|g1207043.t1	Foraminifera	1131	3	GloG15_CONTIG1080349:1-229,297-364(+)			365497	481233	253317	333483	538738	796430	1.35016e+06	399889	286471	654152	574743	296239	823231	321095	707017	639709
g|tr|g1234080.t1	Foraminifera	1000	4	GloG15_CONTIG1125880:6-506(+)	lsfA	PFAM alkyl hydroperoxide reductase Thiol specific antioxidant Mal allergen	942852	1.46095e+06	1.16818e+06	1.38867e+06	1.10343e+06	1.123e+06	1.03793e+06	1.01529e+06	1.15444e+06	1.19257e+06	1.59348e+06	1.76722e+06	1.27647e+06	1.49122e+06	1.52436e+06	1.36967e+06	>g|tr|g1234080.t1	1121904.ARBP01000019_gene2814	1.3e-55	222.6	Cytophagia		1.11.1.15	ko:K03386,ko:K03665	ko04214,map04214				ko00000,ko00001,ko01000,ko03009,ko04147				Bacteria	47KEE@768503,4NEZZ@976,COG0450@1,COG0450@2	NA|NA|NA	O
g|tr|g1256820.t1	Foraminifera	1123	2	GloG15_CONTIG1165586:1-58,146-227,295-471(+)	SDH3-1	unfolded protein binding	2.22703e+06	7.8556e+06	6.33428e+06	7.64458e+06	7.39344e+06	7.25111e+06	1.19213e+07	5.84957e+06	4.14404e+06	7.60255e+06	1.07105e+07	1.16672e+07	9.93353e+06	7.18852e+06	4.63329e+06	6.52126e+06	>g|tr|g1256820.t1	130081.XP_005703818.1	8.4e-32	142.9	Eukaryota	GO:0000166,GO:0000988,GO:0000989,GO:0003674,GO:0003824,GO:0005488,GO:0005515,GO:0005524,GO:0005575,GO:0005618,GO:0005622,GO:0005623,GO:0005737,GO:0005739,GO:0005773,GO:0005774,GO:0005829,GO:0006457,GO:0006458,GO:0006950,GO:0006970,GO:0006986,GO:0008144,GO:0008150,GO:0008270,GO:0009266,GO:0009408,GO:0009507,GO:0009536,GO:0009605,GO:0009607,GO:0009615,GO:0009628,GO:0009651,GO:0009719,GO:0009725,GO:…		ko:K00236,ko:K04043	ko00020,ko00190,ko01100,ko01110,ko01120,ko01130,ko01200,ko03018,ko04212,ko04714,ko04932,ko05010,ko05012,ko05016,ko05152,map00020,map00190,map01100,map01110,map01120,map01130,map01200,map03018,map04212,map04714,map04932,map05010,map05012,map05016,map05152	M00009,M00011,M00148	R02164	RC00045	ko00000,ko00001,ko00002,ko03019,ko03029,ko03110,ko04147	1.A.33.1			Eukaryota	COG0443@1,KOG0102@2759	NA|NA|NA	O
g|tr|g1265430.t1	Foraminifera	1128	2	GloG15_CONTIG1180743:47-354(-)		Belongs to the peroxidase family	433423	852533	423686	600117	581127	726798	721327	512604	625621	714831	387145	176109	1.1864e+06	531114	672875	1.06909e+06	>g|tr|g1265430.t1	81824.XP_001742299.1	2.3e-21	108.2	Opisthokonta	GO:0000302,GO:0003674,GO:0003824,GO:0004130,GO:0004601,GO:0006950,GO:0006979,GO:0008150,GO:0008152,GO:0009056,GO:0009636,GO:0009987,GO:0016209,GO:0016491,GO:0016684,GO:0016999,GO:0017001,GO:0017144,GO:0033554,GO:0034599,GO:0042221,GO:0042737,GO:0042743,GO:0042744,GO:0044237,GO:0044248,GO:0050896,GO:0051186,GO:0051187,GO:0051716,GO:0055114,GO:0070887,GO:0072593,GO:0097237,GO:0098754,GO:0098869,GO:…	1.11.1.11,1.11.1.5	ko:K00428,ko:K00434	ko00053,ko00480,map00053,map00480		R00644	RC00092	ko00000,ko00001,ko01000				Opisthokonta	2QR1E@2759,38E3T@33154,COG0685@1	NA|NA|NA	E
g|tr|g142195.t1	Foraminifera	77	1	GloG15_CONTIG10036:6692-7162,7231-7247,7299-7571,7631-9023(+)	xlnD	xylan 1,4-beta-xylosidase activity	639936	840314	276858	703623	497322	444705	490325	588151	440974	374852	394099	1.29826e+06	608860	521598	576770	640180	>g|tr|g142195.t1	946362.XP_004991004.1	3.3e-159	568.9	Opisthokonta	GO:0000272,GO:0003674,GO:0003824,GO:0004553,GO:0005575,GO:0005576,GO:0005622,GO:0005623,GO:0005975,GO:0005976,GO:0008150,GO:0008152,GO:0009044,GO:0009056,GO:0009057,GO:0009987,GO:0010383,GO:0010410,GO:0016052,GO:0016740,GO:0016757,GO:0016763,GO:0016787,GO:0016798,GO:0042285,GO:0043170,GO:0044036,GO:0044237,GO:0044238,GO:0044260,GO:0044464,GO:0045491,GO:0045493,GO:0046556,GO:0071554,GO:0071704,GO:…	3.2.1.37	ko:K15920	ko00520,ko01100,map00520,map01100		R01433	RC00467	ko00000,ko00001,ko01000		GH3		Opisthokonta	2QQ55@2759,38GSK@33154,COG1472@1	NA|NA|NA	G
g|tr|g145676.t1	Foraminifera	68	7	GloG15_CONTIG10621:3071-5143,5204-5377,5548-5601(-)		Prolyl-tRNA synthetase. Source PGD	225376	657046	495662	576810	627980	508101	737854	700938	545484	1.02994e+06	624594	672563	953741	669859	302113	490519	>g|tr|g145676.t1	65071.PYU1_T002540	2.3e-158	566.2	Pythiales		6.1.1.15	ko:K01881	ko00970,map00970	M00359,M00360	R03661	RC00055,RC00523	ko00000,ko00001,ko00002,ko01000,ko01007,ko03016				Eukaryota	1MF2N@121069,COG0442@1,KOG4163@2759	NA|NA|NA	J
g|tr|g150491.t1	Foraminifera	524	2	GloG15_CONTIG11501:2905-3422,3476-3941(-)		Nitronate monooxygenase	291522	402784	226035	255790	348291	695310	753973	351997	157506	291991	132421	476755	271858	281431	342283	585511	>g|tr|g150491.t1	227086.JGI_V11_54352	5.2e-120	437.6	Eukaryota												Eukaryota	2QQW7@2759,COG2070@1	NA|NA|NA	S
g|tr|g152326.t1	Foraminifera	678	3	GloG15_CONTIG11845:6927-7730(+)		KR domain	446578	497475	254577	406928	378451	384853	385176	331398	308284	288460	588082	322317	363941	481847	501033	394296	>g|tr|g152326.t1	761193.Runsl_0720	3.3e-80	305.1	Cytophagia												Bacteria	47Q3U@768503,4NGQY@976,COG1028@1,COG1028@2	NA|NA|NA	IQ
g|tr|g159992.t1-g|tr|g261654.t1(85.20%)	Foraminifera	223	3	GloG15_CONTIG45886:369-1040(-)	TXNRD1	thioredoxin-disulfide reductase activity	192984	165182	77445.6	124685	205138	318690	424449	205164	248400	200558	76905.7	121887	466439	179698	280829	325349	>g|tr|g159992.t1	946362.XP_004996790.1	2e-134	486.1	Opisthokonta	GO:0000003,GO:0000302,GO:0000305,GO:0001650,GO:0001704,GO:0001707,GO:0001887,GO:0001890,GO:0003006,GO:0003674,GO:0003824,GO:0004791,GO:0005488,GO:0005515,GO:0005575,GO:0005622,GO:0005623,GO:0005634,GO:0005654,GO:0005730,GO:0005737,GO:0005739,GO:0005783,GO:0005829,GO:0006082,GO:0006139,GO:0006518,GO:0006520,GO:0006575,GO:0006725,GO:0006732,GO:0006733,GO:0006739,GO:0006749,GO:0006753,GO:0006790,GO:…	1.8.1.9	ko:K22182	ko00450,ko05200,ko05225,map00450,map05200,map05225		R03596,R09372	RC02518,RC02873	ko00000,ko00001,ko01000				Opisthokonta	38BHT@33154,COG1249@1,KOG4716@2759	NA|NA|NA	C
g|tr|g160825.t1	Foraminifera	592	3	GloG15_CONTIG13530:3477-3832,3914-4466(+)	VPS26A	Vacuolar Protein	366103	869645	644265	673874	755799	740623	643325	799384	691521	837088	492974	401645	643951	659817	651730	590409	>g|tr|g160825.t1	10224.XP_002734825.1	2.4e-95	355.5	Bilateria	GO:0000323,GO:0003674,GO:0005215,GO:0005575,GO:0005622,GO:0005623,GO:0005737,GO:0005764,GO:0005768,GO:0005769,GO:0005773,GO:0005829,GO:0006810,GO:0006886,GO:0007154,GO:0007165,GO:0007166,GO:0007267,GO:0008104,GO:0008150,GO:0008565,GO:0009894,GO:0009966,GO:0009987,GO:0010008,GO:0010506,GO:0010646,GO:0012505,GO:0015031,GO:0015833,GO:0016020,GO:0016055,GO:0016192,GO:0016197,GO:0016241,GO:0016482,GO:…		ko:K18466	ko04144,map04144				ko00000,ko00001,ko04131				Metazoa	38BRU@33154,3BAEB@33208,3CR9J@33213,KOG3063@1,KOG3063@2759	NA|NA|NA	U
g|tr|g165089.t1	Foraminifera	114	33	GloG15_CONTIG14444:54-557,688-1203,1291-1832,1900-2177,2259-2350(-)	HSP90B	unfolded protein binding	1.829e+06	1.61655e+06	1.37337e+06	1.46955e+06	1.59391e+06	1.85903e+06	1.80653e+06	1.8845e+06	2.12849e+06	1.91896e+06	2.03941e+06	1.87979e+06	2.18054e+06	2.01745e+06	2.51999e+06	2.45026e+06	>g|tr|g165089.t1	227086.JGI_V11_53204	4.3e-142	511.9	Eukaryota	GO:0001101,GO:0002790,GO:0003674,GO:0003824,GO:0005575,GO:0005576,GO:0005622,GO:0005623,GO:0005634,GO:0005737,GO:0005739,GO:0005773,GO:0005774,GO:0005783,GO:0005788,GO:0005886,GO:0005911,GO:0006508,GO:0006511,GO:0006807,GO:0006810,GO:0006950,GO:0006970,GO:0008104,GO:0008150,GO:0008152,GO:0009056,GO:0009057,GO:0009266,GO:0009306,GO:0009409,GO:0009414,GO:0009415,GO:0009506,GO:0009507,GO:0009536,GO:…		ko:K04079,ko:K09487	ko04141,ko04151,ko04217,ko04612,ko04621,ko04626,ko04657,ko04659,ko04914,ko04915,ko04918,ko05200,ko05215,ko05418,map04141,map04151,map04217,map04612,map04621,map04626,map04657,map04659,map04914,map04915,map04918,map05200,map05215,map05418				ko00000,ko00001,ko01009,ko03029,ko03051,ko03110,ko04131,ko04147				Eukaryota	COG0326@1,KOG0020@2759	NA|NA|NA	O
g|tr|g166140.t1	Foraminifera	91	1	GloG15_CONTIG14656:519-2603(+)		Mucolipin. Source PGD	1.66779e+06	1.27203e+06	1.54803e+06	1.15397e+06	868331	1.83949e+06	1.62651e+06	1.83562e+06	2.96109e+06	1.73345e+06	2.07382e+06	942101	1.79076e+06	1.59631e+06	2.863e+06	1.74449e+06	>g|tr|g166140.t1	115417.EPrPW00000018354	1.2e-09	72.0	Pythiales			ko:K04994					ko00000,ko04040	1.A.5.3.2,1.A.5.3.4			Eukaryota	1MC6U@121069,KOG3733@1,KOG3733@2759	NA|NA|NA	P
g|tr|g167136.t1-g|tr|g562334.t1(70.97%)-g|tr|g318566.t1(72.83%)-tr|359422363|gb|AEV46057.1|(73.30%)-g|tr|g448035.t1(74.64%)-tr|82568434|dbj|BAE48507.1|(76.50%)	Both	288	65	alpha-tubulin, partial [Planoglabratella opercularis]		Tubulin is the major constituent of microtubules. It binds two moles of GTP, one at an exchangeable site on the beta chain and one at a non-exchangeable site on the alpha chain	8.92865e+06	6.88965e+06	8.21833e+06	7.56683e+06	1.17902e+07	7.88103e+06	7.07273e+06	1.0506e+07	9.08332e+06	8.08843e+06	7.5021e+06	6.10334e+06	6.30889e+06	7.02298e+06	6.83389e+06	8.2082e+06	>g|tr|g167136.t1	4555.Si035662m	5.2e-142	511.1	Poales	GO:0005575,GO:0005622,GO:0005623,GO:0005856,GO:0043226,GO:0043228,GO:0043229,GO:0043232,GO:0044424,GO:0044464		ko:K07374	ko04145,ko04210,ko04530,ko04540,ko05130,map04145,map04210,map04530,map04540,map05130				ko00000,ko00001,ko03019,ko03036,ko04147,ko04812				Viridiplantae	37JG4@33090,3GBTX@35493,3IKGE@38820,3MBKQ@4447,COG5023@1,KOG1376@2759	NA|NA|NA	Z
g|tr|g167419.t1	Foraminifera	1015	4	GloG15_CONTIG14953:598-819,894-1160(+)	UBE2V2	protein K63-linked ubiquitination	1.10043e+06	986765	787378	931334	1.0195e+06	1.11082e+06	1.31028e+06	1.19128e+06	1.2189e+06	1.0729e+06	1.7733e+06	2.13908e+06	1.18794e+06	1.56974e+06	1.22858e+06	1.30645e+06	>g|tr|g167419.t1	72019.SARC_07101T0	8.3e-18	97.1	Opisthokonta	GO:0000151,GO:0000209,GO:0000726,GO:0000729,GO:0003674,GO:0003824,GO:0004842,GO:0005488,GO:0005515,GO:0005575,GO:0005622,GO:0005623,GO:0005634,GO:0005654,GO:0005737,GO:0005829,GO:0006139,GO:0006259,GO:0006281,GO:0006282,GO:0006301,GO:0006302,GO:0006303,GO:0006355,GO:0006464,GO:0006725,GO:0006807,GO:0006950,GO:0006952,GO:0006974,GO:0007154,GO:0007165,GO:0007166,GO:0007275,GO:0007399,GO:0008150,GO:…		ko:K10704	ko04624,map04624				ko00000,ko00001,ko03400				Opisthokonta	3A1Q5@33154,KOG0896@1,KOG0896@2759	NA|NA|NA	O
g|tr|g169327.t1	Foraminifera	895	13	GloG15_CONTIG15382:3761-4039,4102-4335,4401-4490(+)		GTPase activity	818198	748309	643537	719821	631780	673086	526478	717744	1.10007e+06	780996	863603	349506	717260	941076	932166	914995	>g|tr|g169327.t1	5762.XP_002683237.1	2.2e-68	265.4	Eukaryota			ko:K07889	ko04014,ko04144,ko04145,ko04962,ko05146,ko05152,map04014,map04144,map04145,map04962,map05146,map05152				ko00000,ko00001,ko04031,ko04131,ko04147				Eukaryota	KOG0092@1,KOG0092@2759	NA|NA|NA	S
g|tr|g170358.t1	Foraminifera	0	2	GloG15_CONTIG15617:238-7033(+)	USP34	Ubiquitin carboxyl-terminal hydrolase	35457.3	111638	150919	65778.2	90694.6	88209	113875	73051.1	109303	142114	148638	211377	159211	69478.1	52072.3	85802.1	>g|tr|g170358.t1	5911.EAS02785	2.5e-104	388.3	Ciliophora	GO:0001558,GO:0002682,GO:0002683,GO:0002697,GO:0002700,GO:0002759,GO:0002784,GO:0002831,GO:0002832,GO:0002920,GO:0003674,GO:0003824,GO:0004175,GO:0004197,GO:0004843,GO:0005488,GO:0005515,GO:0005575,GO:0005622,GO:0005623,GO:0005634,GO:0005737,GO:0005829,GO:0006464,GO:0006508,GO:0006807,GO:0007154,GO:0007165,GO:0007166,GO:0007267,GO:0007275,GO:0007444,GO:0008150,GO:0008152,GO:0008233,GO:0008234,GO:…	3.4.19.12	ko:K11840,ko:K11853					ko00000,ko01000,ko01002,ko04121				Eukaryota	3ZBAY@5878,COG5077@1,KOG1866@2759	NA|NA|NA	O
g|tr|g170957.t1	Foraminifera	215	2	GloG15_CONTIG15758:1938-3470(+)		Sulfatase	1.28239e+06	895088	356796	789933	997346	661074	544820	1.5511e+06	988947	829689	452553	967520	607344	939650	746868	617994	>g|tr|g170957.t1	81824.XP_001750814.1	9.1e-71	274.6	Eukaryota												Eukaryota	2DDAG@1,2S5MN@2759	NA|NA|NA	S
g|tr|g172574.t1	Foraminifera	823	1	GloG15_CONTIG16130:5005-5080,5150-5730(+)	PRDX4	Peroxiredoxin 4	285679	325034	378363	367186	216141	260079	171114	244442	156256	180961	257297	86409.6	96905	309590	390847	261093	>g|tr|g172574.t1	7739.XP_002586269.1	1.6e-64	252.7	Chordata	GO:0000003,GO:0001775,GO:0002252,GO:0002263,GO:0002274,GO:0002275,GO:0002283,GO:0002366,GO:0002376,GO:0002443,GO:0002444,GO:0002446,GO:0003006,GO:0003674,GO:0003824,GO:0004601,GO:0005488,GO:0005515,GO:0005575,GO:0005576,GO:0005615,GO:0005622,GO:0005623,GO:0005737,GO:0005783,GO:0005790,GO:0005829,GO:0006082,GO:0006457,GO:0006464,GO:0006468,GO:0006520,GO:0006575,GO:0006793,GO:0006796,GO:0006807,GO:…	1.11.1.15	ko:K03386	ko04214,map04214				ko00000,ko00001,ko01000,ko04147				Metazoa	38B9P@33154,3BGS4@33208,3CSM9@33213,488X4@7711,COG0450@1,KOG0852@2759	NA|NA|NA	O
g|tr|g173856.t1	Foraminifera	294	1	GloG15_CONTIG16435:4169-5166,5230-5423,5509-5672(-)	ama	amidohydrolase	10096.1	14278.6	11023.7	17417.1	8677.45	10103.4	21728.6	4742.93	8340.52	12065.2	19669.4	40.3455	26916.2	10184.6	499.549	16405.6	>g|tr|g173856.t1	86416.Clopa_4185	1.3e-76	293.9	Clostridiaceae			ko:K01436					ko00000,ko01000,ko01002				Bacteria	1TPD7@1239,248AH@186801,36DRG@31979,COG1473@1,COG1473@2	NA|NA|NA	E
g|tr|g174551.t1	Foraminifera	12	2	GloG15_CONTIG16601:1965-1974,2039-2158,2219-2962,3033-6376(+)	MTR	5-methyltetrahydrofolate--homocysteine methyltransferase	250151	422158	221170	308809	363969	417804	724498	279597	205351	294637	372151	170997	272219	196730	149966	293932	>g|tr|g174551.t1	946362.XP_004997705.1	0.0	1274.2	Opisthokonta	GO:0000096,GO:0000097,GO:0000302,GO:0001101,GO:0003674,GO:0003824,GO:0005488,GO:0005542,GO:0005575,GO:0005622,GO:0005623,GO:0005737,GO:0005829,GO:0006082,GO:0006464,GO:0006479,GO:0006520,GO:0006555,GO:0006575,GO:0006725,GO:0006732,GO:0006760,GO:0006766,GO:0006767,GO:0006790,GO:0006807,GO:0006950,GO:0006979,GO:0007154,GO:0007275,GO:0007399,GO:0007584,GO:0008144,GO:0008150,GO:0008152,GO:0008168,GO:…	2.1.1.13	ko:K00548	ko00270,ko00450,ko00670,ko01100,ko01110,ko01230,map00270,map00450,map00670,map01100,map01110,map01230	M00017	R00946,R09365	RC00035,RC00113,RC01241	ko00000,ko00001,ko00002,ko01000				Opisthokonta	38H40@33154,COG0646@1,KOG1579@2759	NA|NA|NA	E
g|tr|g175042.t1	Foraminifera	423	2	GloG15_CONTIG16731:3838-4959(-)	RRAGD	Ras-like GTP-binding protein. Source PGD	135048	135520	64431.9	93478.1	88882	121621	97708.9	138645	169266	130703	45244.8	306871	137610	143385	115737	165943	>g|tr|g175042.t1	65071.PYU1_T006845	1.6e-64	253.4	Pythiales	GO:0000166,GO:0000228,GO:0000287,GO:0000322,GO:0000323,GO:0000324,GO:0000329,GO:0000785,GO:0000790,GO:0001101,GO:0001882,GO:0001883,GO:0003674,GO:0003824,GO:0003924,GO:0005488,GO:0005515,GO:0005525,GO:0005575,GO:0005622,GO:0005623,GO:0005634,GO:0005654,GO:0005694,GO:0005737,GO:0005764,GO:0005768,GO:0005770,GO:0005773,GO:0005774,GO:0005813,GO:0005815,GO:0005829,GO:0005856,GO:0006139,GO:0006351,GO:…		ko:K16186	ko04140,ko04150,map04140,map04150				ko00000,ko00001				Eukaryota	1MBSP@121069,KOG3887@1,KOG3887@2759	NA|NA|NA	U
g|tr|g178738.t1	Foraminifera	18	2	GloG15_CONTIG17657:2210-6010(-)	CAND1	Cullin-associated NEDD8-dissociated protein. Source PGD	115509	82508.2	112699	94695	92408	129727	86363	222075	166201	205074	19057	25011.1	85184.6	50503.1	189351	134608	>g|tr|g178738.t1	36331.EPrPI00000015889	6.1e-124	452.6	Pythiales	GO:0000003,GO:0000151,GO:0000909,GO:0003002,GO:0003006,GO:0005575,GO:0005618,GO:0005622,GO:0005623,GO:0005634,GO:0005737,GO:0005829,GO:0005886,GO:0006464,GO:0006725,GO:0006807,GO:0007049,GO:0007275,GO:0007389,GO:0008150,GO:0008152,GO:0009404,GO:0009653,GO:0009712,GO:0009719,GO:0009725,GO:0009733,GO:0009791,GO:0009987,GO:0010033,GO:0010051,GO:0010228,GO:0010265,GO:0016020,GO:0016043,GO:0016567,GO:…		ko:K09490,ko:K17263	ko03060,ko04141,ko04918,ko05020,map03060,map04141,map04918,map05020				ko00000,ko00001,ko03110,ko04131,ko04147	1.A.33			Eukaryota	1MC5W@121069,KOG1824@1,KOG1824@2759	NA|NA|NA	S
g|tr|g180218.t1	Foraminifera	343	2	GloG15_CONTIG18017:1804-2055,2113-2879,2963-3191(+)	TM9SF3	Belongs to the nonaspanin (TM9SF) (TC 9.A.2) family	249169	574637	606086	715805	388611	339717	381951	336071	312927	436065	937797	324527	434840	492870	593819	514990	>g|tr|g180218.t1	3988.XP_002530674.1	9.1e-69	267.7	fabids	GO:0005575,GO:0016020,GO:0016021,GO:0031224,GO:0044425		ko:K17087					ko00000,ko04147				Viridiplantae	37QY7@33090,3GBC8@35493,4JDJH@91835,KOG1277@2759,KOG1278@1	NA|NA|NA	U
g|tr|g183154.t1	Foraminifera	118	3	GloG15_CONTIG18780:283-595,668-770,825-1261,1323-2392(+)		Calpain-like thiol protease family.	197153	145343	138264	136064	177740	150127	168367	218385	226101	212269	208485	290016	180107	181530	153873	146909	>g|tr|g183154.t1	5888.CAK58228	1.4e-63	251.1	Ciliophora			ko:K08582					ko00000,ko01000,ko01002				Eukaryota	3ZD9G@5878,KOG0045@1,KOG0045@2759	NA|NA|NA	OT
g|tr|g183722.t1	Foraminifera	502	2	GloG15_CONTIG18929:4922-5449,5521-6012(-)	ABHD14A	Abhydrolase domain containing 14A	258979	530436	312565	420500	386303	376473	490588	428059	331230	340412	302103	565561	488183	381259	406433	501753	>g|tr|g183722.t1	89462.XP_006045082.1	4.1e-35	155.6	Cetartiodactyla			ko:K13706					ko00000,ko01002				Mammalia	2QR0B@2759,39UB0@33154,3CNQS@33208,3E4WW@33213,3JQ4B@40674,48RGI@7711,49N2C@7742,4JC5Y@91561,COG0596@1	NA|NA|NA	S
g|tr|g184656.t1	Foraminifera	60	8	GloG15_CONTIG19181:1-1280,1377-2345,2411-2545(-)		Sodium potassium-transporting ATPase subunit alpha	277110	788362	279423	665062	470179	444143	656781	437567	611302	704794	466727	336958	824863	376912	199911	496123	>g|tr|g184656.t1	135651.CBN24020	1.1e-107	397.9	Rhabditida	GO:0000003,GO:0000166,GO:0001508,GO:0003674,GO:0003824,GO:0005215,GO:0005391,GO:0005488,GO:0005524,GO:0005575,GO:0005623,GO:0005886,GO:0006810,GO:0006811,GO:0006812,GO:0006813,GO:0006814,GO:0006937,GO:0008144,GO:0008150,GO:0008324,GO:0008556,GO:0009987,GO:0010248,GO:0015075,GO:0015077,GO:0015079,GO:0015081,GO:0015318,GO:0015399,GO:0015405,GO:0015662,GO:0015672,GO:0016020,GO:0016462,GO:0016787,GO:…	3.6.3.9	ko:K01539	ko04022,ko04024,ko04260,ko04261,ko04911,ko04918,ko04919,ko04925,ko04960,ko04961,ko04964,ko04970,ko04971,ko04972,ko04973,ko04974,ko04976,ko04978,map04022,map04024,map04260,map04261,map04911,map04918,map04919,map04925,map04960,map04961,map04964,map04970,map04971,map04972,map04973,map04974,map04976,map04978				ko00000,ko00001,ko01000,ko04147	3.A.3.1			Nematoda	1KV4P@119089,38BIP@33154,3BAR6@33208,3CTGX@33213,40CA5@6231,40WAC@6236,COG0474@1,KOG0203@2759	NA|NA|NA	P
g|tr|g184705.t1	Foraminifera	899	1	GloG15_CONTIG19193:5128-5652,5726-5800(-)			108280	161216	10685.7	69879.5	150165	141999	169224	111806	74075.4	101289	101376	31811.7	143990	150904	197334	173302
g|tr|g186150.t1	Foraminifera	390	7	GloG15_CONTIG19581:3133-3166,3232-4373(+)	mdh	Catalyzes the reversible oxidation of malate to oxaloacetate	528834	1.98428e+06	622057	1.44706e+06	1.89931e+06	1.86265e+06	3.10493e+06	1.60532e+06	921505	1.68141e+06	1.23361e+06	727003	2.19663e+06	1.10492e+06	781091	1.40049e+06	>g|tr|g186150.t1	1279017.AQYJ01000029_gene3787	1.2e-94	353.6	Alteromonadaceae	GO:0003674,GO:0003824,GO:0005575,GO:0005618,GO:0005622,GO:0005623,GO:0005737,GO:0005829,GO:0005886,GO:0005975,GO:0006082,GO:0006091,GO:0006099,GO:0006101,GO:0006107,GO:0006108,GO:0006139,GO:0006725,GO:0006732,GO:0006733,GO:0006734,GO:0006753,GO:0006793,GO:0006796,GO:0006807,GO:0008150,GO:0008152,GO:0009060,GO:0009117,GO:0009987,GO:0015980,GO:0016020,GO:0016491,GO:0016614,GO:0016615,GO:0016616,GO:…	1.1.1.37	ko:K00024	ko00020,ko00270,ko00620,ko00630,ko00680,ko00710,ko00720,ko01100,ko01110,ko01120,ko01130,ko01200,map00020,map00270,map00620,map00630,map00680,map00710,map00720,map01100,map01110,map01120,map01130,map01200	M00009,M00011,M00012,M00168,M00173,M00346,M00374,M00620,M00740	R00342,R07136	RC00031	ko00000,ko00001,ko00002,ko01000				Bacteria	1MV57@1224,1RMAX@1236,463ZA@72275,COG0039@1,COG0039@2	NA|NA|NA	C
g|tr|g188279.t1	Foraminifera	122	1	GloG15_CONTIG20159:190-448,532-2189(+)		function. Source PGD	40923.4	34307.9	41088.8	37700.4	19845	28070.1	28267.2	33022.4	23132.1	28997	38576.5	37399.9	22634.4	33235.2	19927	43837.8	>g|tr|g188279.t1	115417.EPrPW00000020255	2.7e-11	77.4	Pythiales												Eukaryota	1MA8R@121069,28J6D@1,2QRIJ@2759	NA|NA|NA	S
g|tr|g188550.t1	Foraminifera	157	1	GloG15_CONTIG20234:3815-4025,4093-4449,4600-4884,5040-5890(+)	DLAT	dihydrolipoyllysine-residue acetyltransferase activity	408975	559389	719920	928995	407301	787919	669486	383891	379082	379504	416217	310366	527276	425595	609514	598985	>g|tr|g188550.t1	55529.EKX54570	5.2e-99	368.6	Eukaryota	GO:0000166,GO:0003674,GO:0003824,GO:0004742,GO:0005488,GO:0005515,GO:0005575,GO:0005622,GO:0005623,GO:0005737,GO:0005739,GO:0005759,GO:0005967,GO:0006082,GO:0006084,GO:0006085,GO:0006086,GO:0006090,GO:0006139,GO:0006163,GO:0006164,GO:0006637,GO:0006725,GO:0006732,GO:0006733,GO:0006753,GO:0006790,GO:0006793,GO:0006796,GO:0006807,GO:0007610,GO:0007625,GO:0008150,GO:0008152,GO:0009058,GO:0009108,GO:…	2.3.1.12	ko:K00627	ko00010,ko00020,ko00620,ko01100,ko01110,ko01120,ko01130,ko01200,map00010,map00020,map00620,map01100,map01110,map01120,map01130,map01200	M00307	R00209,R02569	RC00004,RC02742,RC02857	br01601,ko00000,ko00001,ko00002,ko01000				Eukaryota	COG0508@1,KOG0557@2759	NA|NA|NA	C
g|tr|g188714.t1	Foraminifera	517	2	GloG15_CONTIG20279:4332-4858,5036-5134,5285-5413,5479-5722(-)	BCAT1	branched-chain-amino-acid transaminase activity	178083	166437	105902	148775	110595	289810	254777	143121	245420	195053	84283.8	136638	166156	144968	144478	217224	>g|tr|g188714.t1	157072.XP_008861338.1	1.1e-96	360.1	Eukaryota	GO:0000082,GO:0000278,GO:0002119,GO:0002164,GO:0003674,GO:0003824,GO:0004084,GO:0005488,GO:0005515,GO:0005575,GO:0005622,GO:0005623,GO:0005634,GO:0005737,GO:0005739,GO:0005759,GO:0005829,GO:0006082,GO:0006520,GO:0006549,GO:0006550,GO:0006551,GO:0006573,GO:0006807,GO:0006810,GO:0007049,GO:0007275,GO:0007589,GO:0007595,GO:0008144,GO:0008150,GO:0008152,GO:0008283,GO:0008483,GO:0008652,GO:0009056,GO:…	1.1.1.363,1.1.1.49,2.6.1.42	ko:K00036,ko:K00826	ko00030,ko00270,ko00280,ko00290,ko00480,ko00770,ko01100,ko01110,ko01120,ko01130,ko01200,ko01210,ko01230,ko05230,map00030,map00270,map00280,map00290,map00480,map00770,map01100,map01110,map01120,map01130,map01200,map01210,map01230,map05230	M00004,M00006,M00008,M00019,M00036,M00119,M00570	R00835,R01090,R01214,R02199,R02736,R10907,R10991	RC00001,RC00006,RC00036,RC00066	ko00000,ko00001,ko00002,ko01000,ko01007,ko04147				Eukaryota	COG0115@1,KOG0975@2759	NA|NA|NA	E
g|tr|g191324.t1	Foraminifera	1108	1	GloG15_CONTIG20996:5396-5749(+)	SOD2	radicals which are normally produced within the cells and which are toxic to biological systems	2.21014e+06	3.06241e+06	423916	1.72656e+06	1.82139e+06	2.73674e+06	2.84636e+06	2.22211e+06	1.56371e+06	1.79349e+06	1.15606e+06	351151	1.56217e+06	1.43153e+06	3.09416e+06	3.82662e+06	>g|tr|g191324.t1	9555.ENSPANP00000003209	1.5e-24	119.0	Cercopithecoidea	GO:0000302,GO:0000303,GO:0000305,GO:0001101,GO:0001306,GO:0001315,GO:0001505,GO:0001666,GO:0001836,GO:0001889,GO:0001976,GO:0002237,GO:0002376,GO:0002520,GO:0003008,GO:0003013,GO:0003018,GO:0003032,GO:0003044,GO:0003068,GO:0003069,GO:0003070,GO:0003073,GO:0003085,GO:0003674,GO:0003676,GO:0003677,GO:0003824,GO:0004784,GO:0005488,GO:0005515,GO:0005575,GO:0005622,GO:0005623,GO:0005737,GO:0005739,GO:…	1.15.1.1	ko:K04564	ko04013,ko04068,ko04146,ko04211,ko04212,ko04213,ko05016,map04013,map04068,map04146,map04211,map04212,map04213,map05016				ko00000,ko00001,ko01000				Mammalia	35C17@314146,365JW@314294,396RM@33154,3BAMQ@33208,3CWP6@33213,3JAZX@40674,480ZY@7711,48WR5@7742,4MB5B@9443,COG0605@1,KOG0876@2759	NA|NA|NA	P
g|tr|g193039.t1	Foraminifera	800	4	GloG15_CONTIG21484:99-505,570-846(-)	VAMP7	SNAP receptor activity	390052	693288	241148	525024	544484	470018	545475	702653	658512	742270	447416	469321	569606	453659	519892	628646	>g|tr|g193039.t1	157072.XP_008875486.1	1.3e-53	216.5	Eukaryota	GO:0000149,GO:0000288,GO:0000323,GO:0000932,GO:0000956,GO:0001101,GO:0001775,GO:0001906,GO:0001909,GO:0002228,GO:0002252,GO:0002263,GO:0002274,GO:0002275,GO:0002278,GO:0002283,GO:0002285,GO:0002323,GO:0002366,GO:0002376,GO:0002443,GO:0002444,GO:0002446,GO:0002447,GO:0002449,GO:0002682,GO:0002684,GO:0002694,GO:0002696,GO:0002697,GO:0002699,GO:0002703,GO:0002705,GO:0002886,GO:0002888,GO:0003674,GO:…		ko:K08511,ko:K08515	ko04130,map04130				ko00000,ko00001,ko04131,ko04147				Eukaryota	COG5143@1,KOG0859@2759	NA|NA|NA	U
g|tr|g194421.t1	Foraminifera	142	2	GloG15_CONTIG21881:1-545,618-1487,1572-1702,1764-1880,1966-2058,2129-2201(-)		intra-Golgi vesicle-mediated transport	5377.68	34920.9	71988.3	77598.2	35837.1	20644.8	49927.9	5249.9	18640.8	76121.1	45179.5	195687	52041.8	11912.2	9634.71	30920.6	>g|tr|g194421.t1	227086.JGI_V11_45669	1.1e-70	274.6	Eukaryota	GO:0000003,GO:0000132,GO:0000226,GO:0000235,GO:0000278,GO:0000775,GO:0000776,GO:0000902,GO:0000904,GO:0001501,GO:0001558,GO:0001667,GO:0001675,GO:0001736,GO:0001738,GO:0001764,GO:0001932,GO:0001933,GO:0001959,GO:0001961,GO:0002009,GO:0002064,GO:0002065,GO:0002066,GO:0002376,GO:0002520,GO:0002521,GO:0002573,GO:0002790,GO:0003006,GO:0003008,GO:0003674,GO:0005488,GO:0005515,GO:0005575,GO:0005622,GO:…		ko:K02084,ko:K05236,ko:K14549	ko01524,ko03008,ko04115,ko04210,ko04214,ko04215,ko05010,ko05012,ko05014,ko05016,ko05134,ko05152,ko05161,ko05200,ko05222,map01524,map03008,map04115,map04210,map04214,map04215,map05010,map05012,map05014,map05016,map05134,map05152,map05161,map05200,map05222	M00685			ko00000,ko00001,ko00002,ko03009,ko04131,ko04147				Eukaryota	KOG0292@1,KOG0292@2759	NA|NA|NA	U
g|tr|g195770.t1	Foraminifera	270	11	GloG15_CONTIG22275:49-577,827-1695(+)		Aldehyde dehydrogenase family	1.33525e+06	1.66162e+06	951788	1.41022e+06	1.47673e+06	1.57662e+06	1.24696e+06	1.5979e+06	1.31117e+06	1.25176e+06	1.24716e+06	1.327e+06	1.30909e+06	1.43609e+06	1.60306e+06	1.61153e+06	>g|tr|g195770.t1	161934.XP_010682578.1	4.5e-149	534.6	Streptophyta		1.2.1.3	ko:K00128	ko00010,ko00053,ko00071,ko00280,ko00310,ko00330,ko00340,ko00380,ko00410,ko00561,ko00620,ko00625,ko00903,ko00981,ko01100,ko01110,ko01120,ko01130,map00010,map00053,map00071,map00280,map00310,map00330,map00340,map00380,map00410,map00561,map00620,map00625,map00903,map00981,map01100,map01110,map01120,map01130	M00135	R00264,R00631,R00710,R00904,R01752,R01986,R02549,R02678,R02940,R02957,R03283,R03869,R04065,R04506,R04903,R05050,R05237,R05238,R05286,R06366,R08146	RC00047,RC00071,RC00080,RC00186,RC00218,RC00242,RC00816,RC01500	ko00000,ko00001,ko00002,ko01000				Viridiplantae	37KEV@33090,3GBEC@35493,COG1012@1,KOG2450@2759	NA|NA|NA	C
g|tr|g196647.t1	Foraminifera	233	1	GloG15_CONTIG22544:677-1650,1718-2243(-)		hydrolase activity	269434	356377	341858	346026	276233	310783	335560	203171	249533	260168	467104	577004	263032	314189	270737	334659	>g|tr|g196647.t1	1347369.CCAD010000078_gene2977	2.4e-55	223.4	Bacillus												Bacteria	1TPD7@1239,1ZB09@1386,4H9WQ@91061,COG1473@1,COG1473@2	NA|NA|NA	E
g|tr|g198817.t1	Foraminifera	5	2	GloG15_CONTIG23181:1-5183(-)	ODA-DHCB	dynein light chain binding	3025.92	7648.73	8279.97	16118.6	16955.2	149978	208511	6579.52	5920.44	13929.4	2572.99	1522.29	104856	3169.31	14349.5	11292.7	>g|tr|g198817.t1	227086.JGI_V11_92928	0.0	1623.2	Eukaryota	GO:0005575,GO:0005623,GO:0005929,GO:0031514,GO:0042995,GO:0043226,GO:0044464,GO:0120025		ko:K10408	ko05016,map05016				ko00000,ko00001,ko04812				Eukaryota	COG5245@1,KOG3595@2759	NA|NA|NA	Z
g|tr|g198910.t1	Foraminifera	228	7	GloG15_CONTIG23212:1-1508(-)		Elongation factor 2. Source PGD	739243	903180	547442	741169	1.06816e+06	1.19445e+06	1.48909e+06	1.091e+06	823838	1.08464e+06	585880	449750	1.44034e+06	579428	661053	798462	>g|tr|g198910.t1	36331.EPrPI00000018624	8.5e-130	470.7	Pythiales	GO:0003674,GO:0003676,GO:0003723,GO:0003746,GO:0003824,GO:0003924,GO:0005488,GO:0005515,GO:0005575,GO:0005622,GO:0005623,GO:0005737,GO:0005829,GO:0006412,GO:0006414,GO:0006417,GO:0006448,GO:0006518,GO:0006807,GO:0008135,GO:0008150,GO:0008152,GO:0009058,GO:0009059,GO:0009889,GO:0009891,GO:0009893,GO:0009987,GO:0010467,GO:0010468,GO:0010556,GO:0010557,GO:0010604,GO:0010608,GO:0010628,GO:0016462,GO:…	6.1.1.3	ko:K01868,ko:K03234	ko00970,ko04152,ko04921,map00970,map04152,map04921	M00359,M00360	R03663	RC00055,RC00523	ko00000,ko00001,ko00002,ko01000,ko01007,ko03012,ko03016,ko04147				Eukaryota	1MAN3@121069,COG0480@1,KOG0469@2759	NA|NA|NA	J
g|tr|g198911.t1	Foraminifera	1093	4	GloG15_CONTIG23212:1890-2279(-)	eef2	Elongation factor	1.76646e+06	2.32378e+06	1.89304e+06	2.11772e+06	2.60833e+06	2.3948e+06	2.65756e+06	2.40911e+06	1.69705e+06	1.89471e+06	1.38573e+06	2.17779e+06	2.65944e+06	1.68004e+06	1.33535e+06	1.80636e+06	>g|tr|g198911.t1	8081.XP_008432096.1	1.7e-29	135.6	Actinopterygii			ko:K03234	ko04152,ko04921,map04152,map04921				ko00000,ko00001,ko03012,ko04147				Metazoa	38CUM@33154,3BAEX@33208,3CUB5@33213,48038@7711,48ZMF@7742,49UCW@7898,COG0480@1,KOG0469@2759	NA|NA|NA	J
g|tr|g199617.t1	Foraminifera	1136	1	GloG15_CONTIG23407:4523-4651,4706-4716,4775-4907(-)	CSTB	Cystatin B (stefin B)	599676	708098	624675	725614	525895	697504	685345	546042	706882	671186	591730	1.12515e+06	673651	543927	777696	837982	>g|tr|g199617.t1	81824.XP_001742194.1	3e-09	67.8	Opisthokonta	GO:0002020,GO:0003674,GO:0004857,GO:0004866,GO:0004869,GO:0005488,GO:0005515,GO:0005575,GO:0005576,GO:0005615,GO:0005622,GO:0005623,GO:0005634,GO:0005730,GO:0005737,GO:0005829,GO:0007610,GO:0007626,GO:0008150,GO:0008344,GO:0009892,GO:0010466,GO:0010605,GO:0010951,GO:0019222,GO:0019899,GO:0030162,GO:0030234,GO:0030414,GO:0030534,GO:0031323,GO:0031324,GO:0031974,GO:0031981,GO:0032268,GO:0032269,GO:…		ko:K13907					ko00000,ko04147				Opisthokonta	2BXE4@1,2SF2X@2759,3A8T7@33154	NA|NA|NA	S
g|tr|g200665.t1	Foraminifera	75	1	GloG15_CONTIG23721:604-983,1041-1731,1794-2325,2434-2999(+)			6300.81	13963	11320.7	11149.9	7819.1	5099.9	9852.61	0	2221.07	0	0	12384.5	0	0	0	7542.22
g|tr|g201246.t1	Foraminifera	279	2	GloG15_CONTIG23892:3431-3467,3522-4255,4398-5015(+)	RUVBL1	Proposed core component of the chromatin remodeling INO80 complex which is involved in transcriptional regulation, DNA replication and probably DNA repair	54782.3	118282	61522.8	76740.2	146227	396952	470099	91909.4	67676.4	126558	32809.4	452283	312351	48660.7	120024	217400	>g|tr|g201246.t1	8479.XP_005288447.1	4.1e-163	581.3	Testudines	GO:0000003,GO:0000123,GO:0000166,GO:0000226,GO:0000228,GO:0000278,GO:0000280,GO:0000491,GO:0000492,GO:0000785,GO:0000790,GO:0000812,GO:0001085,GO:0001091,GO:0001094,GO:0001098,GO:0001099,GO:0002119,GO:0002164,GO:0003674,GO:0003678,GO:0003712,GO:0003713,GO:0003824,GO:0004003,GO:0004386,GO:0005488,GO:0005515,GO:0005524,GO:0005575,GO:0005622,GO:0005623,GO:0005634,GO:0005654,GO:0005694,GO:0005737,GO:…		ko:K04499	ko04310,map04310				ko00000,ko00001,ko03036				Metazoa	38CD9@33154,3BBD7@33208,3CVK4@33213,483WK@7711,492WD@7742,4C786@8459,COG1224@1,KOG1942@2759	NA|NA|NA	L
g|tr|g201371.t1	Foraminifera	738	1	GloG15_CONTIG23927:1833-2136,2221-2328,2389-2525,2610-2633,2695-2786,2841-2922(+)		Microsomal Glutathione S-transferase. Source PGD	204139	395311	158361	304244	212991	245004	292631	519135	264853	357088	274241	203526	344824	492963	299633	457890	>g|tr|g201371.t1	65071.PYU1_T004097	1.8e-24	119.8	Pythiales		2.5.1.18	ko:K00799	ko00480,ko00980,ko00982,ko00983,ko01524,ko05200,ko05204,ko05225,ko05418,map00480,map00980,map00982,map00983,map01524,map05200,map05204,map05225,map05418		R03522,R07002,R07003,R07004,R07023,R07024,R07025,R07026,R07069,R07070,R07083,R07084,R07091,R07092,R07093,R07094,R07100,R07113,R07116,R08280,R09409,R11905	RC00004,RC00069,RC00840,RC00948,RC01704,RC01705,RC01706,RC01758,RC01759,RC01765,RC01767,RC01769,RC02243,RC02527,RC02939,RC02940,RC02942,RC02943,RC02944	ko00000,ko00001,ko01000,ko02000	1.A.12.2.2,1.A.12.3.2			Eukaryota	1MHDB@121069,2CUIV@1,2S4E5@2759	NA|NA|NA	S
g|tr|g202941.t1-g|tr|g677501.t1(73.36%)	Foraminifera	396	2	GloG15_CONTIG367741:33-947(+)	YARS	tyrosine-tRNA ligase activity	120068	533785	1.13395e+06	699427	537269	337862	620484	362901	209998	677897	309680	396508	809407	478381	183965	396063	>g|tr|g202941.t1	112098.XP_008606574.1	4.6e-123	448.0	Eukaryota	GO:0000049,GO:0001664,GO:0002181,GO:0002682,GO:0002685,GO:0002688,GO:0003674,GO:0003676,GO:0003723,GO:0003729,GO:0003824,GO:0004812,GO:0004831,GO:0005102,GO:0005126,GO:0005153,GO:0005488,GO:0005515,GO:0005575,GO:0005576,GO:0005615,GO:0005622,GO:0005623,GO:0005634,GO:0005654,GO:0005737,GO:0005829,GO:0006082,GO:0006139,GO:0006399,GO:0006412,GO:0006418,GO:0006437,GO:0006518,GO:0006520,GO:0006725,GO:…	6.1.1.1	ko:K01866	ko00970,map00970	M00359,M00360	R02918	RC00055,RC00523	ko00000,ko00001,ko00002,ko01000,ko01007,ko03016,ko03029			iMM904.YGR185C,iND750.YGR185C	Eukaryota	COG0162@1,KOG2144@2759	NA|NA|NA	J
g|tr|g203030.t1	Foraminifera	31	9	GloG15_CONTIG24412:1306-1540,1602-2057,2121-2774,2924-3559,3619-4045,4117-4864(+)		2-oxoglutarate dehydrogenase	79107	256018	154107	214686	188314	242168	368328	119518	138195	176347	203508	195305	304150	131203	97398.1	149237	>g|tr|g203030.t1	3712.Bo3g097740.1	4e-262	911.4	Brassicales	GO:0003674,GO:0003824,GO:0004591,GO:0005575,GO:0005622,GO:0005623,GO:0005737,GO:0005739,GO:0005759,GO:0005947,GO:0006082,GO:0006091,GO:0006099,GO:0006101,GO:0008150,GO:0008152,GO:0009060,GO:0009353,GO:0009987,GO:0015980,GO:0016491,GO:0016624,GO:0016903,GO:0016999,GO:0017144,GO:0019752,GO:0030062,GO:0031974,GO:0032991,GO:0043226,GO:0043227,GO:0043229,GO:0043231,GO:0043233,GO:0043436,GO:0044237,GO:…	1.2.4.2	ko:K00164	ko00020,ko00310,ko00380,ko01100,ko01110,ko01120,ko01130,ko01200,map00020,map00310,map00380,map01100,map01110,map01120,map01130,map01200	M00009,M00011,M00032	R00621,R01933,R01940,R03316,R08549	RC00004,RC00027,RC00627,RC02743,RC02833,RC02883	br01601,ko00000,ko00001,ko00002,ko01000				Viridiplantae	37MIR@33090,3GGCN@35493,3HN5H@3699,COG0567@1,KOG0450@2759	NA|NA|NA	C
g|tr|g207041.t1	Foraminifera	247	2	GloG15_CONTIG25620:3232-4689(+)	UBP6	Ubiquitin homologues	119409	147314	179230	154857	215350	207852	396916	215528	185342	225010	69169.5	92088.6	198938	189131	219611	206542	>g|tr|g207041.t1	78898.MVEG_02414T0	2.1e-69	270.0	Fungi incertae sedis	GO:0000502,GO:0003674,GO:0003824,GO:0004843,GO:0005575,GO:0005622,GO:0005623,GO:0005838,GO:0006464,GO:0006508,GO:0006511,GO:0006807,GO:0008150,GO:0008152,GO:0008233,GO:0008234,GO:0009056,GO:0009057,GO:0009892,GO:0009894,GO:0009895,GO:0009987,GO:0010498,GO:0010605,GO:0016579,GO:0016787,GO:0019222,GO:0019538,GO:0019783,GO:0019941,GO:0022624,GO:0030162,GO:0030163,GO:0031323,GO:0031324,GO:0031329,GO:…	3.4.19.12	ko:K11843					ko00000,ko01000,ko01002,ko04121				Fungi	1GRTZ@112252,38F2F@33154,3NUIQ@4751,KOG1872@1,KOG1872@2759	NA|NA|NA	O
g|tr|g207403.t1	Foraminifera	183	18	GloG15_CONTIG25741:675-1146,1243-2095,2173-2470(-)	CCT3	assists the folding of proteins upon ATP hydrolysis	803047	1.77836e+06	1.32735e+06	1.5646e+06	1.76282e+06	1.53861e+06	2.63635e+06	1.41876e+06	1.31637e+06	1.98816e+06	1.23396e+06	1.4124e+06	2.14007e+06	1.24133e+06	770833	1.16829e+06	>g|tr|g207403.t1	109760.SPPG_05432T0	8.7e-189	666.8	Fungi	GO:0003674,GO:0005488,GO:0005515,GO:0005575,GO:0005622,GO:0005623,GO:0005737,GO:0005829,GO:0005832,GO:0005856,GO:0006457,GO:0006458,GO:0008150,GO:0009987,GO:0032991,GO:0043226,GO:0043228,GO:0043229,GO:0043232,GO:0044183,GO:0044424,GO:0044444,GO:0044445,GO:0044464,GO:0051082,GO:0061077,GO:0101031		ko:K09495					ko00000,ko03036,ko03110,ko04147				Fungi	38GPW@33154,3NV7S@4751,COG0459@1,KOG0364@2759	NA|NA|NA	O
g|tr|g207595.t1	Foraminifera	171	6	GloG15_CONTIG25802:727-1945,2005-2441(-)	PPP3CA	calcium-dependent protein serine/threonine phosphatase activity	89450.1	263142	233592	259555	234224	158739	279398	266788	126006	293453	242093	223409	301053	157204	158458	145980	>g|tr|g207595.t1	227086.JGI_V11_92394	2.2e-163	582.4	Eukaryota	GO:0000003,GO:0000082,GO:0000278,GO:0000280,GO:0000302,GO:0000749,GO:0000754,GO:0000902,GO:0000904,GO:0001505,GO:0001678,GO:0001775,GO:0001776,GO:0001910,GO:0001911,GO:0001914,GO:0001915,GO:0001944,GO:0001945,GO:0001946,GO:0001975,GO:0002119,GO:0002164,GO:0002260,GO:0002376,GO:0002520,GO:0002521,GO:0002682,GO:0002683,GO:0002697,GO:0002698,GO:0002703,GO:0002704,GO:0002706,GO:0002707,GO:0002709,GO:…	3.1.3.16	ko:K04348	ko04010,ko04020,ko04022,ko04114,ko04218,ko04310,ko04360,ko04370,ko04380,ko04650,ko04658,ko04659,ko04660,ko04662,ko04720,ko04724,ko04728,ko04921,ko04922,ko04924,ko05010,ko05014,ko05031,ko05152,ko05166,ko05167,map04010,map04020,map04022,map04114,map04218,map04310,map04360,map04370,map04380,map04650,map04658,map04659,map04660,map04662,map04720,map04724,map04728,map04921,map04922,map04924,map05010,ma…				ko00000,ko00001,ko01000,ko01009				Eukaryota	COG0639@1,KOG0375@2759	NA|NA|NA	T
g|tr|g207752.t1	Foraminifera	480	3	GloG15_CONTIG25852:386-701,777-1501(+)	NNT	NAD(P)+ transhydrogenase (AB-specific) activity	813921	924327	516155	814033	941789	923571	1.08897e+06	1.24207e+06	788532	1.29196e+06	504568	430400	1.19175e+06	726391	968079	1.01278e+06	>g|tr|g207752.t1	400682.PAC_15721658	7.7e-122	443.7	Metazoa	GO:0000166,GO:0003674,GO:0003824,GO:0003957,GO:0005215,GO:0005488,GO:0005575,GO:0005622,GO:0005623,GO:0005737,GO:0005739,GO:0005740,GO:0005743,GO:0005746,GO:0006082,GO:0006091,GO:0006099,GO:0006101,GO:0006139,GO:0006725,GO:0006732,GO:0006733,GO:0006739,GO:0006740,GO:0006753,GO:0006793,GO:0006796,GO:0006807,GO:0006810,GO:0006811,GO:0006812,GO:0008150,GO:0008152,GO:0008324,GO:0008746,GO:0008750,GO:…	1.6.1.2	ko:K00323	ko00760,ko01100,map00760,map01100		R00112	RC00001	ko00000,ko00001,ko01000				Metazoa	2QQ0A@2759,38CB0@33154,3BDQK@33208,COG1282@1	NA|NA|NA	C
g|tr|g207755.t1	Foraminifera	927	3	GloG15_CONTIG25853:2743-3299,3362-3377(-)	ypt2	GTPase activity	1.55866e+06	1.06751e+06	1.3533e+06	1.20976e+06	1.16897e+06	992701	801413	1.25672e+06	1.32596e+06	1.23649e+06	1.751e+06	1.80581e+06	1.24663e+06	1.05749e+06	1.30065e+06	1.21116e+06	>g|tr|g207755.t1	55529.EKX37967	4.4e-71	274.2	Eukaryota	GO:0000166,GO:0000331,GO:0001882,GO:0001883,GO:0002790,GO:0002791,GO:0003674,GO:0003824,GO:0003924,GO:0005488,GO:0005515,GO:0005525,GO:0005575,GO:0005622,GO:0005623,GO:0005628,GO:0005737,GO:0005768,GO:0005773,GO:0005774,GO:0005815,GO:0005816,GO:0005856,GO:0005886,GO:0006810,GO:0006886,GO:0006887,GO:0006892,GO:0006893,GO:0006903,GO:0006904,GO:0006906,GO:0006996,GO:0007010,GO:0007033,GO:0007155,GO:…		ko:K07901,ko:K07915,ko:K18158	ko04144,ko04152,ko04530,ko04972,map04144,map04152,map04530,map04972				ko00000,ko00001,ko03029,ko03036,ko04031,ko04131,ko04147				Eukaryota	KOG0078@1,KOG0078@2759	NA|NA|NA	S
g|tr|g211150.t1	Foraminifera	7	2	GloG15_CONTIG26946:1-4938(-)	DYNC1H1	minus-end-directed vesicle transport along microtubule	128444	177437	269609	224461	197807	162579	132060	133957	108186	166789	210116	105138	213539	165963	102827	89141.9	>g|tr|g211150.t1	8364.ENSXETP00000058458	2.2e-299	1035.8	Vertebrata	GO:0000003,GO:0000086,GO:0000226,GO:0000278,GO:0000323,GO:0000775,GO:0000776,GO:0000902,GO:0000904,GO:0000922,GO:0001101,GO:0001667,GO:0001709,GO:0001738,GO:0001775,GO:0002009,GO:0002064,GO:0002065,GO:0002066,GO:0002177,GO:0002252,GO:0002263,GO:0002274,GO:0002275,GO:0002283,GO:0002366,GO:0002376,GO:0002443,GO:0002444,GO:0002446,GO:0002478,GO:0002495,GO:0002504,GO:0003002,GO:0003006,GO:0003341,GO:…		ko:K10413	ko04145,ko04962,ko05132,map04145,map04962,map05132				ko00000,ko00001,ko03036,ko04147,ko04812				Metazoa	38BS8@33154,3BHTB@33208,3CRDZ@33213,4882C@7711,491PA@7742,COG5245@1,KOG3595@2759	NA|NA|NA	Z
g|tr|g211347.t1	Foraminifera	552	1	GloG15_CONTIG27008:1216-1342,1417-1903,2089-2422(+)	SLC25A34	Mitochondrial carrier protein	26644.8	30307.2	25435.4	30976.2	33071.4	78720.3	138202	24208.4	24592.5	28750.2	18153	23486	31976.1	23995.3	15241.5	25765.5	>g|tr|g211347.t1	4792.ETI50790	7.9e-73	280.8	Peronosporales	GO:0003674,GO:0005215,GO:0005575,GO:0005622,GO:0005623,GO:0005737,GO:0005739,GO:0005740,GO:0005743,GO:0006810,GO:0006839,GO:0008150,GO:0016020,GO:0016021,GO:0019866,GO:0022857,GO:0031090,GO:0031224,GO:0031966,GO:0031967,GO:0031975,GO:0043226,GO:0043227,GO:0043229,GO:0043231,GO:0044422,GO:0044424,GO:0044425,GO:0044429,GO:0044444,GO:0044446,GO:0044464,GO:0051179,GO:0051234,GO:0055085		ko:K15117,ko:K15348	ko05132,map05132				ko00000,ko00001,ko02000,ko04131	2.A.29.15			Eukaryota	3QCP7@4776,KOG0755@1,KOG0755@2759	NA|NA|NA	C
g|tr|g212205.t1	Foraminifera	1070	4	GloG15_CONTIG27294:1716-1941,2039-2235(+)	rpl-23	Belongs to the universal ribosomal protein uL14 family	27900.5	379759	158731	340211	412908	203002	552190	162699	62616.2	392028	92527.9	66132.6	663004	120121	121396	92103.5	>g|tr|g212205.t1	6326.BUX.s00055.4	3.9e-56	224.2	Chromadorea			ko:K02894	ko03010,map03010	M00177			br01610,ko00000,ko00001,ko00002,ko03011				Nematoda	1KVPF@119089,39ZWX@33154,3BPE2@33208,3D69J@33213,40CWQ@6231,COG0093@1,KOG0901@2759	NA|NA|NA	J
g|tr|g213098.t1	Foraminifera	35	4	GloG15_CONTIG27582:950-1545,1613-2099,2184-2852,2909-3392,3573-4414(-)		calcium-transporting ATPase activity	421317	740419	694762	637983	448435	623575	617299	507424	804394	736828	403845	437555	591997	535577	635224	638993	>g|tr|g213098.t1	227086.JGI_V11_40526	2.8e-204	719.2	Eukaryota		3.6.3.8	ko:K01537,ko:K05850	ko04020,ko04022,ko04024,ko04261,ko04925,ko04970,ko04972,map04020,map04022,map04024,map04261,map04925,map04970,map04972				ko00000,ko00001,ko01000	3.A.3.2			Eukaryota	COG0474@1,KOG0204@2759	NA|NA|NA	P
g|tr|g213339.t1	Foraminifera	21	1	GloG15_CONTIG27653:45-172,260-876,967-1959,2020-3902(+)		C2 domain	73359.8	124761	182916	142460	115936	71167.3	58919.5	92936.7	169535	211053	131789	126264	173737	78645	105597	149944	>g|tr|g213339.t1	112098.XP_008609903.1	2.1e-57	231.5	Eukaryota			ko:K19949,ko:K22125,ko:K22127					ko00000,ko04131				Eukaryota	COG5038@1,KOG1012@2759,KOG1326@1,KOG1326@2759	NA|NA|NA	M
g|tr|g213764.t1	Foraminifera	184	1	GloG15_CONTIG27800:2741-2890,2959-4431(+)		Aminotransferase	47575.7	27358.1	25625.5	19538.5	25686.6	56012.2	39815.7	46366	50105.1	34007.6	37347.1	51692.3	31701.4	41717.2	40575.2	48115.1	>g|tr|g213764.t1	588596.U9UD72	1.1e-95	357.5	Fungi		2.6.1.5	ko:K00815	ko00130,ko00270,ko00350,ko00360,ko00400,ko00401,ko00950,ko00960,ko01100,ko01110,ko01130,ko01230,map00130,map00270,map00350,map00360,map00400,map00401,map00950,map00960,map01100,map01110,map01130,map01230	M00025,M00034	R00694,R00734,R07396	RC00006	ko00000,ko00001,ko00002,ko01000,ko01007				Fungi	38BAA@33154,3P12F@4751,COG0436@1,KOG0259@2759	NA|NA|NA	E
g|tr|g214333.t1	Foraminifera	326	5	GloG15_CONTIG27984:1385-2079,2191-2778,2864-2867(-)	tuf	This protein promotes the GTP-dependent binding of aminoacyl-tRNA to the A-site of ribosomes during protein biosynthesis	68891.9	362607	263106	300406	386851	261184	470388	346431	174101	421158	214261	81567.5	567060	163834	140777	274037	>g|tr|g214333.t1	438753.AZC_0880	1.5e-127	463.0	Xanthobacteraceae	GO:0005575,GO:0005622,GO:0005623,GO:0005737,GO:0044424,GO:0044464		ko:K02358					ko00000,ko03012,ko03029,ko04147				Bacteria	1MVC0@1224,2TQP8@28211,3EY1N@335928,COG0050@1,COG0050@2	NA|NA|NA	J
g|tr|g214446.t1	Foraminifera	402	3	GloG15_CONTIG28023:2467-2937,3014-3700(+)	GME	UDP-glucuronate decarboxylase activity	2.39658e+06	3.33071e+06	2.68228e+06	2.90203e+06	3.66697e+06	4.20656e+06	4.83715e+06	3.21109e+06	2.59922e+06	4.08697e+06	1.85194e+06	1.00063e+06	3.89957e+06	2.23425e+06	2.55231e+06	2.89085e+06	>g|tr|g214446.t1	130081.XP_005703429.1	1.6e-131	476.1	Eukaryota	GO:0000166,GO:0003674,GO:0003824,GO:0005488,GO:0005575,GO:0005622,GO:0005623,GO:0005737,GO:0005829,GO:0005975,GO:0005996,GO:0006082,GO:0006732,GO:0006766,GO:0006767,GO:0008150,GO:0008152,GO:0009058,GO:0009108,GO:0009110,GO:0009987,GO:0016051,GO:0016053,GO:0016853,GO:0016854,GO:0016857,GO:0019752,GO:0019852,GO:0019853,GO:0036094,GO:0042364,GO:0043436,GO:0044237,GO:0044238,GO:0044249,GO:0044281,GO:…	5.1.3.18	ko:K10046	ko00053,ko00520,ko01100,ko01110,map00053,map00520,map01100,map01110	M00114	R00889,R07672,R07673	RC00289,RC00403,RC01780	ko00000,ko00001,ko00002,ko01000				Eukaryota	COG0451@1,KOG1429@2759	NA|NA|NA	GM
g|tr|g214735.t1	Foraminifera	1055	1	GloG15_CONTIG28123:3222-3503,3650-3805(-)	RpL23A	ribosomal large subunit assembly	216348	539647	330893	469529	575760	275330	642900	269256	187307	552259	597970	583438	893171	399841	172585	270550	>g|tr|g214735.t1	51511.ENSCSAVP00000013596	2e-39	168.7	Chordata	GO:0000027,GO:0002181,GO:0003674,GO:0003676,GO:0003723,GO:0003735,GO:0005198,GO:0005488,GO:0005575,GO:0005622,GO:0005623,GO:0005737,GO:0005829,GO:0005840,GO:0006412,GO:0006518,GO:0006807,GO:0006996,GO:0008150,GO:0008152,GO:0009058,GO:0009059,GO:0009987,GO:0010467,GO:0015934,GO:0016043,GO:0019538,GO:0022607,GO:0022613,GO:0022618,GO:0022625,GO:0022626,GO:0032991,GO:0034622,GO:0034641,GO:0034645,GO:…		ko:K02893	ko03010,map03010	M00177			br01610,ko00000,ko00001,ko00002,ko03011				Metazoa	3A1K9@33154,3BJFK@33208,3CZJC@33213,486FA@7711,COG0089@1,KOG1751@2759	NA|NA|NA	J
g|tr|g216158.t1	Foraminifera	9	10	GloG15_CONTIG28590:119-4811(+)			562572	679054	450605	639729	1.32867e+06	512591	452790	766630	559662	666404	657165	721610	682945	575816	403323	597985	>g|tr|g216158.t1	1123242.JH636435_gene2121	3.8e-120	440.3	Bacteria												Bacteria	28KJF@1,2Z84W@2	NA|NA|NA
g|tr|g217113.t1	Foraminifera	152	3	GloG15_CONTIG28907:2474-3400,3454-3697,3757-4328(-)		Essential subunit of the N-oligosaccharyl transferase (OST) complex which catalyzes the transfer of a high mannose oligosaccharide from a lipid-linked oligosaccharide donor to an asparagine residue within an Asn-X-Ser Thr consensus motif in nascent polypeptide chains	23790.8	131819	138150	131673	125517	95492.9	171918	73917.5	52350.8	127726	89154.3	25490	149027	43275.7	38186.9	96418.2	>g|tr|g217113.t1	7370.XP_005185550.1	4.8e-68	265.8	Diptera	GO:0003674,GO:0003824,GO:0004576,GO:0004579,GO:0005575,GO:0005622,GO:0005623,GO:0005737,GO:0005783,GO:0005789,GO:0006464,GO:0006486,GO:0006487,GO:0006807,GO:0008150,GO:0008152,GO:0008250,GO:0009058,GO:0009059,GO:0009100,GO:0009101,GO:0009987,GO:0012505,GO:0016020,GO:0016740,GO:0016757,GO:0016758,GO:0018193,GO:0018196,GO:0018279,GO:0019538,GO:0031984,GO:0032991,GO:0034645,GO:0036211,GO:0042175,GO:…		ko:K12666	ko00510,ko00513,ko01100,ko04141,map00510,map00513,map01100,map04141	M00072			ko00000,ko00001,ko00002				Arthropoda	38DP8@33154,3BABJ@33208,3CX18@33213,3SGK6@50557,41VKK@6656,44WZI@7147,KOG2291@1,KOG2291@2759	NA|NA|NA	G
g|tr|g217538.t1	Foraminifera	291	3	GloG15_CONTIG29044:1-1363(+)	RPN2	26S proteasome, regulatory subunit	160829	233468	96025.4	136320	224340	269332	404876	293220	260584	213156	135007	414652	335148	257144	175388	241956	>g|tr|g217538.t1	109760.SPPG_07359T0	1.5e-77	297.0	Fungi	GO:0000502,GO:0003674,GO:0005488,GO:0005515,GO:0005575,GO:0005622,GO:0005623,GO:0005634,GO:0005737,GO:0005829,GO:0005838,GO:0006508,GO:0006511,GO:0006807,GO:0007088,GO:0007346,GO:0008150,GO:0008152,GO:0008540,GO:0009056,GO:0009057,GO:0009896,GO:0009987,GO:0010498,GO:0010564,GO:0010638,GO:0010965,GO:0016043,GO:0019538,GO:0019941,GO:0022607,GO:0022624,GO:0030071,GO:0030163,GO:0030674,GO:0031331,GO:…		ko:K03032	ko03050,ko05169,map03050,map05169	M00341			ko00000,ko00001,ko00002,ko03051				Fungi	38E5Y@33154,3NUMK@4751,COG5116@1,KOG2062@2759	NA|NA|NA	O
g|tr|g217908.t1	Foraminifera	972	7	GloG15_CONTIG29171:3632-3833,3892-3952,4016-4286(+)	ARL8B	GTP binding	375725	358809	325602	326619	322886	286582	277039	293441	473989	350546	274656	235106	293493	448964	411607	428210	>g|tr|g217908.t1	192875.XP_004363502.1	3.8e-56	224.6	Opisthokonta	GO:0000166,GO:0000306,GO:0000323,GO:0000819,GO:0001666,GO:0001775,GO:0001882,GO:0001883,GO:0002252,GO:0002263,GO:0002274,GO:0002275,GO:0002283,GO:0002366,GO:0002376,GO:0002443,GO:0002444,GO:0002446,GO:0003674,GO:0003824,GO:0003924,GO:0005488,GO:0005515,GO:0005525,GO:0005575,GO:0005622,GO:0005623,GO:0005737,GO:0005764,GO:0005765,GO:0005766,GO:0005768,GO:0005770,GO:0005773,GO:0005774,GO:0005819,GO:…		ko:K07955					ko00000,ko04031,ko04131				Opisthokonta	38F0Z@33154,COG1100@1,KOG0075@2759	NA|NA|NA	U
g|tr|g218062.t1	Foraminifera	189	5	GloG15_CONTIG29220:950-1789,1857-2621(-)	acsA	Acetyl-coenzyme A synthetase N-terminus	989220	766421	486897	635393	846930	848046	695289	1.13499e+06	1.2039e+06	990760	414125	138745	1.00423e+06	551322	1.26508e+06	1.02694e+06	>g|tr|g218062.t1	1089550.ATTH01000001_gene1035	2.4e-159	568.9	Bacteroidetes Order II. Incertae sedis	GO:0003674,GO:0003824,GO:0003987,GO:0005575,GO:0005622,GO:0005623,GO:0005737,GO:0005829,GO:0006082,GO:0006083,GO:0006084,GO:0006085,GO:0006139,GO:0006163,GO:0006164,GO:0006464,GO:0006473,GO:0006476,GO:0006637,GO:0006725,GO:0006732,GO:0006753,GO:0006790,GO:0006793,GO:0006796,GO:0006807,GO:0008150,GO:0008152,GO:0009056,GO:0009058,GO:0009108,GO:0009117,GO:0009150,GO:0009152,GO:0009165,GO:0009259,GO:…	6.2.1.1	ko:K01895	ko00010,ko00620,ko00640,ko00680,ko00720,ko01100,ko01110,ko01120,ko01130,ko01200,map00010,map00620,map00640,map00680,map00720,map01100,map01110,map01120,map01130,map01200	M00357	R00235,R00236,R00316,R00926,R01354	RC00004,RC00012,RC00043,RC00070,RC02746,RC02816	ko00000,ko00001,ko00002,ko01000,ko01004			iE2348C_1286.E2348C_4392,iYL1228.KPN_04478	Bacteria	1FIQ4@1100069,4NEAD@976,COG0365@1,COG0365@2	NA|NA|NA	H
g|tr|g218063.t1	Foraminifera	468	2	GloG15_CONTIG29220:3442-3591,3652-4566(+)	SDS23	Involved in DNA replication and cell separation	681255	625754	463978	721892	456637	649376	469531	740213	781285	576977	823978	412208	508243	1.01657e+06	950902	947235	>g|tr|g218063.t1	588596.U9SY65	7.6e-24	118.2	Fungi	GO:0000920,GO:0003674,GO:0004857,GO:0004864,GO:0004865,GO:0005575,GO:0005622,GO:0005623,GO:0005634,GO:0005737,GO:0005829,GO:0006810,GO:0006897,GO:0006950,GO:0007088,GO:0007154,GO:0007346,GO:0008150,GO:0009267,GO:0009605,GO:0009892,GO:0009896,GO:0009987,GO:0009991,GO:0010563,GO:0010564,GO:0010605,GO:0010638,GO:0010921,GO:0010923,GO:0010965,GO:0016192,GO:0019208,GO:0019212,GO:0019220,GO:0019222,GO:…											Fungi	398VT@33154,3NU9M@4751,COG0517@1,KOG1764@2759	NA|NA|NA	C
g|tr|g219112.t1	Foraminifera	73	5	GloG15_CONTIG29571:1101-2218,2292-2856,2912-3433(-)	LACS2	decanoate-CoA ligase activity	514631	1.31247e+06	865920	920402	829376	851747	953652	621464	676265	747556	1.57425e+06	3.32599e+06	1.17114e+06	821314	499414	757687	>g|tr|g219112.t1	227086.JGI_V11_89068	4.8e-113	415.6	Eukaryota	GO:0001676,GO:0003674,GO:0003824,GO:0004467,GO:0005575,GO:0005622,GO:0005623,GO:0005737,GO:0005777,GO:0005783,GO:0005794,GO:0005886,GO:0005911,GO:0006082,GO:0006629,GO:0006631,GO:0006950,GO:0006952,GO:0007275,GO:0008150,GO:0008152,GO:0009058,GO:0009059,GO:0009506,GO:0009605,GO:0009607,GO:0009620,GO:0009653,GO:0009791,GO:0009987,GO:0010015,GO:0010025,GO:0010101,GO:0010102,GO:0010143,GO:0010166,GO:…	6.2.1.3	ko:K01897	ko00061,ko00071,ko01100,ko01212,ko02024,ko03320,ko04146,ko04216,ko04714,ko04920,map00061,map00071,map01100,map01212,map02024,map03320,map04146,map04216,map04714,map04920	M00086	R01280	RC00004,RC00014	ko00000,ko00001,ko00002,ko01000,ko01004,ko04147	4.C.1.1			Eukaryota	COG1022@1,KOG1256@2759	NA|NA|NA	I
g|tr|g220079.t1	Foraminifera	803	5	GloG15_CONTIG29907:2488-2635,2709-3238(+)	GSP1	GTP-binding protein involved in nucleocytoplasmic transport. Required for the import of protein into the nucleus and also for RNA export. Involved in chromatin condensation and control of cell cycle	432108	814683	729529	789644	636633	977057	1.24406e+06	974099	631029	869505	656497	1.18797e+06	983468	782690	861585	981019	>g|tr|g220079.t1	36080.S2K5S7	2.8e-88	331.6	Fungi incertae sedis	GO:0000054,GO:0000166,GO:0000459,GO:0000460,GO:0000466,GO:0000467,GO:0000469,GO:0001882,GO:0001883,GO:0003674,GO:0003824,GO:0003924,GO:0005085,GO:0005087,GO:0005088,GO:0005488,GO:0005515,GO:0005525,GO:0005575,GO:0005622,GO:0005623,GO:0005634,GO:0005737,GO:0005829,GO:0006139,GO:0006355,GO:0006364,GO:0006396,GO:0006403,GO:0006405,GO:0006406,GO:0006606,GO:0006611,GO:0006725,GO:0006807,GO:0006810,GO:…		ko:K07936	ko03008,ko03013,ko05166,ko05169,map03008,map03013,map05166,map05169				ko00000,ko00001,ko03009,ko03016,ko03019,ko03036,ko04031,ko04147				Fungi	1GT67@112252,38BBN@33154,3NW2J@4751,KOG0096@1,KOG0096@2759	NA|NA|NA	U
g|tr|g222233.t1	Foraminifera	149	33	GloG15_CONTIG30634:969-1756,1858-2484,2548-2782,2875-2979(-)	HSP60	protein refolding	2.33768e+06	3.0829e+06	1.65359e+06	2.55367e+06	2.60272e+06	2.83492e+06	2.7539e+06	3.48297e+06	3.11392e+06	3.03597e+06	2.23809e+06	2.58419e+06	3.29585e+06	2.88766e+06	2.96504e+06	3.23797e+06	>g|tr|g222233.t1	130081.XP_005708137.1	2.3e-179	635.6	Eukaryota	GO:0000003,GO:0000166,GO:0003674,GO:0003735,GO:0005198,GO:0005488,GO:0005507,GO:0005515,GO:0005524,GO:0005575,GO:0005622,GO:0005623,GO:0005737,GO:0005739,GO:0005759,GO:0005773,GO:0005774,GO:0005829,GO:0005840,GO:0005844,GO:0005886,GO:0006457,GO:0006458,GO:0006605,GO:0006626,GO:0006810,GO:0006839,GO:0006886,GO:0006950,GO:0006996,GO:0007005,GO:0008104,GO:0008144,GO:0008150,GO:0009266,GO:0009314,GO:…		ko:K02940,ko:K04077	ko03010,ko03018,ko04212,ko04940,ko05134,ko05152,map03010,map03018,map04212,map04940,map05134,map05152	M00177			br01610,ko00000,ko00001,ko00002,ko03011,ko03019,ko03029,ko03110,ko04147				Eukaryota	COG0459@1,KOG0356@2759	NA|NA|NA	O
g|tr|g222792.t1	Foraminifera	371	1	GloG15_CONTIG30825:916-2127(-)		negative regulation of mitochondrial membrane permeability involved in apoptotic process	595356	2.5853e+06	1.10108e+06	1.95805e+06	2.06156e+06	2.7528e+06	3.30144e+06	1.46629e+06	1.71492e+06	2.93642e+06	2.49887e+06	1.12327e+06	4.50898e+06	1.94957e+06	1.43124e+06	2.07353e+06	>g|tr|g222792.t1	5762.XP_002670100.1	3.2e-111	408.7	Eukaryota		2.3.1.16	ko:K07508	ko00062,ko00071,ko00280,ko01100,ko01110,ko01130,ko01212,map00062,map00071,map00280,map01100,map01110,map01130,map01212	M00085,M00087	R00391,R00927,R01177,R03778,R03858,R03991,R04546,R04742,R04747	RC00004,RC00326,RC00405,RC01702	ko00000,ko00001,ko00002,ko01000				Eukaryota	COG0183@1,KOG1391@2759	NA|NA|NA	I
g|tr|g222811.t1	Foraminifera	503	3	GloG15_CONTIG30830:3580-4597(+)		vesicle-mediated transport	260221	452095	846159	605184	349029	394802	382340	266880	467321	625898	568762	306614	487721	415235	250137	357351	>g|tr|g222811.t1	112098.XP_008614336.1	2.3e-115	422.2	Eukaryota	GO:0000139,GO:0000323,GO:0001775,GO:0002090,GO:0002092,GO:0002119,GO:0002164,GO:0002252,GO:0002263,GO:0002274,GO:0002275,GO:0002283,GO:0002366,GO:0002376,GO:0002443,GO:0002444,GO:0002446,GO:0002478,GO:0002495,GO:0002504,GO:0003674,GO:0005048,GO:0005102,GO:0005215,GO:0005488,GO:0005515,GO:0005575,GO:0005622,GO:0005623,GO:0005737,GO:0005764,GO:0005765,GO:0005773,GO:0005774,GO:0005794,GO:0005798,GO:…		ko:K12393	ko04142,map04142				ko00000,ko00001,ko04131				Eukaryota	KOG0937@1,KOG0937@2759	NA|NA|NA	U
g|tr|g223913.t1	Foraminifera	136	2	GloG15_CONTIG31223:510-1233,1287-1463,1536-2488(+)		ligase activity	857486	788724	138434	507690	430619	704587	571774	946742	1.02288e+06	849809	393407	637895	874416	877119	892707	869525	>g|tr|g223913.t1	227086.JGI_V11_87362	2.9e-111	409.5	Eukaryota												Eukaryota	COG0318@1,KOG1176@2759	NA|NA|NA	IQ
g|tr|g224877.t1-g|tr|g1146391.t1(95.68%)	Foraminifera	377	1	GloG15_CONTIG981560:1-558(+)		cysteine synthase activity	51959.3	193524	29427.6	127648	101045	183812	89514.7	60581.6	83003.6	74696.4	74904.7	9083.44	109312	97162.7	127734	88864	>g|tr|g224877.t1	227086.JGI_V11_38633	2.9e-104	385.6	Eukaryota	GO:0000096,GO:0000097,GO:0003674,GO:0003824,GO:0004124,GO:0005488,GO:0005575,GO:0005622,GO:0005623,GO:0005737,GO:0006082,GO:0006520,GO:0006534,GO:0006535,GO:0006563,GO:0006790,GO:0006807,GO:0008144,GO:0008150,GO:0008152,GO:0008652,GO:0009058,GO:0009069,GO:0009070,GO:0009987,GO:0016053,GO:0016740,GO:0016765,GO:0019344,GO:0019752,GO:0019842,GO:0030170,GO:0036094,GO:0043167,GO:0043168,GO:0043436,GO:…	2.5.1.47	ko:K01738	ko00270,ko00920,ko01100,ko01110,ko01120,ko01130,ko01200,ko01230,map00270,map00920,map01100,map01110,map01120,map01130,map01200,map01230	M00021	R00897,R03601,R04859	RC00020,RC02814,RC02821	ko00000,ko00001,ko00002,ko01000				Eukaryota	COG0031@1,KOG1481@2759	NA|NA|NA	E
g|tr|g224995.t1	Foraminifera	388	16	GloG15_CONTIG31608:504-1682(-)	RPT4	proteasome-activating ATPase activity	294946	618406	575382	581938	700992	443361	924900	553521	560056	680783	666881	841476	785772	473022	342750	404357	>g|tr|g224995.t1	227086.JGI_V11_53747	2.7e-155	555.1	Eukaryota	GO:0000166,GO:0000502,GO:0000731,GO:0001672,GO:0002020,GO:0002082,GO:0003674,GO:0003824,GO:0004175,GO:0005102,GO:0005488,GO:0005515,GO:0005524,GO:0005575,GO:0005622,GO:0005623,GO:0005634,GO:0005654,GO:0005694,GO:0005737,GO:0005783,GO:0005789,GO:0005811,GO:0005829,GO:0005838,GO:0006139,GO:0006140,GO:0006163,GO:0006259,GO:0006281,GO:0006289,GO:0006301,GO:0006302,GO:0006355,GO:0006357,GO:0006464,GO:…		ko:K03064	ko03050,ko05169,map03050,map05169	M00341			ko00000,ko00001,ko00002,ko03051				Eukaryota	COG1222@1,KOG0651@2759	NA|NA|NA	O
g|tr|g226022.t1	Foraminifera	90	2	GloG15_CONTIG31957:1983-4073(+)	TKL1	transketolase activity	550701	611095	184541	430010	603975	658201	631004	628572	566069	612932	529652	480439	678656	554598	590046	635730	>g|tr|g226022.t1	192875.XP_004346092.1	1.6e-182	646.4	Opisthokonta	GO:0003674,GO:0003824,GO:0004802,GO:0005575,GO:0005622,GO:0005623,GO:0005634,GO:0005737,GO:0006081,GO:0006098,GO:0006139,GO:0006725,GO:0006732,GO:0006733,GO:0006739,GO:0006753,GO:0006793,GO:0006796,GO:0006807,GO:0008150,GO:0008152,GO:0009052,GO:0009117,GO:0009987,GO:0016740,GO:0016744,GO:0019362,GO:0019637,GO:0019682,GO:0019693,GO:0034641,GO:0043226,GO:0043227,GO:0043229,GO:0043231,GO:0044237,GO:…	2.2.1.1	ko:K00615	ko00030,ko00710,ko01051,ko01100,ko01110,ko01120,ko01130,ko01200,ko01230,map00030,map00710,map01051,map01100,map01110,map01120,map01130,map01200,map01230	M00004,M00007,M00165,M00167	R01067,R01641,R01830,R06590	RC00032,RC00226,RC00571,RC01560	ko00000,ko00001,ko00002,ko01000				Opisthokonta	38B8B@33154,COG0021@1,KOG0523@2759	NA|NA|NA	G
g|tr|g226132.t1	Foraminifera	197	3	GloG15_CONTIG31998:8-1595(-)		hydrogen-translocating pyrophosphatase activity	1.58372e+06	1.4419e+06	722735	1.16368e+06	1.11552e+06	1.12069e+06	1.03483e+06	2.19559e+06	1.98525e+06	1.14839e+06	1.09143e+06	1.1335e+06	1.25588e+06	1.73735e+06	1.51761e+06	1.24495e+06	>g|tr|g226132.t1	227086.JGI_V11_92746	2.7e-81	309.7	Eukaryota		3.6.1.1	ko:K01507	ko00190,map00190				ko00000,ko00001,ko01000				Eukaryota	2QPJC@2759,COG3808@1	NA|NA|NA	C
g|tr|g226342.t1	Foraminifera	185	1	GloG15_CONTIG32074:288-875,925-982,1047-2020(-)	pepA	Presumably involved in the processing and regular turnover of intracellular proteins. Catalyzes the removal of unsubstituted N-terminal amino acids from various peptides	70123.6	87226.4	156149	88456.5	52244.3	76372.4	111623	45634.4	85043.3	50235.4	164219	35925.8	138921	57728.2	99215.7	60524.2	>g|tr|g226342.t1	395961.Cyan7425_3765	3.1e-77	296.2	Cyanothece		3.4.11.1	ko:K01255	ko00480,ko01100,map00480,map01100		R00899,R04951	RC00096,RC00141	ko00000,ko00001,ko01000,ko01002				Bacteria	1G079@1117,3KH6T@43988,COG0260@1,COG0260@2	NA|NA|NA	J
g|tr|g226799.t1	Foraminifera	1004	2	GloG15_CONTIG32231:1630-2124(+)	PFDN5	sister chromatid segregation	713949	734555	396793	635209	474216	888095	912567	480421	560823	589701	740204	1.69751e+06	584874	539510	656249	557002	>g|tr|g226799.t1	42099.EPrPV00000019488	1.6e-16	92.8	Eukaryota	GO:0001654,GO:0003674,GO:0003712,GO:0003714,GO:0005488,GO:0005515,GO:0005575,GO:0005622,GO:0005623,GO:0005634,GO:0005737,GO:0005829,GO:0006355,GO:0006357,GO:0007021,GO:0007275,GO:0007423,GO:0008092,GO:0008150,GO:0009889,GO:0009890,GO:0009891,GO:0009892,GO:0009893,GO:0009966,GO:0009968,GO:0009987,GO:0010468,GO:0010556,GO:0010557,GO:0010558,GO:0010604,GO:0010605,GO:0010628,GO:0010629,GO:0010646,GO:…	6.1.1.15	ko:K01881,ko:K03678,ko:K04797,ko:K09504	ko00970,ko03018,ko05203,map00970,map03018,map05203	M00359,M00360,M00391	R03661	RC00055,RC00523	ko00000,ko00001,ko00002,ko01000,ko01007,ko03016,ko03019,ko03029,ko03110				Eukaryota	COG1730@1,KOG3048@2759	NA|NA|NA	O
g|tr|g227630.t1	Foraminifera	578	8	GloG15_CONTIG32539:1943-1945,2013-2933(+)		thiosulfate transmembrane transporter activity	926342	935031	546271	817642	698343	1.0044e+06	989709	687971	738530	662418	584863	461537	563701	694683	857609	872281	>g|tr|g227630.t1	227086.JGI_V11_37107	6.6e-101	374.0	Eukaryota	GO:0003674,GO:0005215,GO:0005310,GO:0005342,GO:0005575,GO:0005622,GO:0005623,GO:0005737,GO:0005739,GO:0005740,GO:0005743,GO:0006810,GO:0006811,GO:0006820,GO:0006835,GO:0006839,GO:0008150,GO:0008509,GO:0008514,GO:0015075,GO:0015140,GO:0015291,GO:0015297,GO:0015301,GO:0015318,GO:0015367,GO:0015556,GO:0015711,GO:0015740,GO:0015742,GO:0015743,GO:0015849,GO:0016020,GO:0016021,GO:0019866,GO:0022804,GO:…	3.1.13.4	ko:K10838,ko:K12571,ko:K13577,ko:K15104	ko03018,ko03420,ko04964,map03018,map03420,map04964				ko00000,ko00001,ko01000,ko02000,ko03019,ko03400	2.A.29.2.1,2.A.29.2.2,2.A.29.2.3,2.A.29.2.7,2.A.29.2.9			Eukaryota	KOG0759@1,KOG0759@2759	NA|NA|NA	U
g|tr|g228397.t1	Foraminifera	426	2	GloG15_CONTIG32820:2711-2942,3243-4126(+)		methylmalonate-semialdehyde dehydrogenase (acylating) activity	466131	641247	376595	645185	881673	949807	1.40809e+06	829188	408756	667639	426182	375442	979188	505993	746341	750831	>g|tr|g228397.t1	5762.XP_002681901.1	2.4e-121	442.2	Eukaryota	GO:0003674,GO:0003824,GO:0004491,GO:0005575,GO:0005622,GO:0005623,GO:0005737,GO:0005739,GO:0008150,GO:0008152,GO:0016491,GO:0016620,GO:0016903,GO:0043226,GO:0043227,GO:0043229,GO:0043231,GO:0044424,GO:0044444,GO:0044464,GO:0055114	1.2.1.18,1.2.1.27	ko:K00140	ko00280,ko00410,ko00562,ko00640,ko01100,ko01200,map00280,map00410,map00562,map00640,map01100,map01200	M00013	R00705,R00706,R00922,R00935	RC00004,RC02723,RC02817	ko00000,ko00001,ko00002,ko01000				Eukaryota	KOG2449@1,KOG2449@2759	NA|NA|NA	L
g|tr|g229405.t1	Foraminifera	308	3	GloG15_CONTIG33175:935-2204,2277-2318,2383-2402(-)		Serine carboxypeptidase	278579	289219	361603	256779	289429	272034	246106	457092	306356	427017	102157	87490.7	373753	158445	265742	346159	>g|tr|g229405.t1	7918.ENSLOCP00000007707	2.4e-96	359.4	Actinopterygii		3.4.16.5	ko:K09645,ko:K13289,ko:K16298	ko04142,ko04614,map04142,map04614				ko00000,ko00001,ko01000,ko01002,ko03110,ko04131,ko04147				Metazoa	38FWP@33154,3BDSA@33208,3CUIQ@33213,48109@7711,48YEJ@7742,4A5VJ@7898,COG2939@1,KOG1282@2759	NA|NA|NA	O
g|tr|g230173.t1	Foraminifera	216	1	GloG15_CONTIG33450:310-377,461-769,835-1491,1554-2052(+)	PAH	Biopterin-dependent aromatic amino acid hydroxylase	1694.81	73394.9	0	42306.7	161587	39187.8	64304.4	163872	28232.8	113836	10360.1	3811.78	76949.5	39275.6	0	31425.4	>g|tr|g230173.t1	4792.ETI31942	2.9e-109	402.5	Peronosporales	GO:0000003,GO:0001101,GO:0001505,GO:0001654,GO:0001666,GO:0001678,GO:0001754,GO:0001963,GO:0001975,GO:0002119,GO:0002164,GO:0002237,GO:0003007,GO:0003008,GO:0003674,GO:0003824,GO:0004497,GO:0004505,GO:0004510,GO:0004511,GO:0005488,GO:0005506,GO:0005515,GO:0005575,GO:0005622,GO:0005623,GO:0005634,GO:0005737,GO:0005739,GO:0005783,GO:0005790,GO:0005829,GO:0005886,GO:0006066,GO:0006082,GO:0006464,GO:…	1.14.16.1,1.14.16.2,1.14.16.4	ko:K00500,ko:K00501,ko:K00502,ko:K20168	ko00350,ko00360,ko00380,ko00400,ko00790,ko00950,ko01100,ko01230,ko04137,ko04726,ko04728,ko04917,ko05012,ko05030,ko05031,ko05034,map00350,map00360,map00380,map00400,map00790,map00950,map01100,map01230,map04137,map04726,map04728,map04917,map05012,map05030,map05031,map05034	M00037,M00042	R01795,R01814,R01815,R07211,R07212,R07213	RC00046,RC00490	ko00000,ko00001,ko00002,ko01000,ko04131				Eukaryota	3Q9RN@4776,COG3186@1,KOG3820@2759	NA|NA|NA	E
g|tr|g230795.t1	Foraminifera	742	1	GloG15_CONTIG33678:1-68,156-832(+)	tgb1	Guanine nucleotide-binding protein subunit beta	40187.1	58423	15576.3	33173.8	74298.9	51251.1	50800.7	58159.8	69512.3	82937.9	19609.1	8307.44	69466	28375.7	67932.5	35140	>g|tr|g230795.t1	936053.I1C4D8	5.2e-56	224.6	Fungi	GO:0000429,GO:0000430,GO:0000433,GO:0000749,GO:0000750,GO:0001403,GO:0001678,GO:0003674,GO:0005198,GO:0005488,GO:0005515,GO:0005575,GO:0005622,GO:0005623,GO:0005834,GO:0005886,GO:0005937,GO:0006355,GO:0006357,GO:0007154,GO:0007165,GO:0007186,GO:0007187,GO:0007188,GO:0007189,GO:0007584,GO:0008150,GO:0008277,GO:0009605,GO:0009606,GO:0009743,GO:0009746,GO:0009749,GO:0009756,GO:0009757,GO:0009889,GO:…		ko:K04536	ko04011,ko04014,ko04062,ko04151,ko04371,ko04713,ko04723,ko04724,ko04725,ko04726,ko04727,ko04728,ko04740,ko04744,ko04926,ko05032,ko05034,ko05167,ko05200,map04011,map04014,map04062,map04151,map04371,map04713,map04723,map04724,map04725,map04726,map04727,map04728,map04740,map04744,map04926,map05032,map05034,map05167,map05200				ko00000,ko00001,ko04031,ko04147				Fungi	38C52@33154,3NUGZ@4751,KOG0286@1,KOG0286@2759	NA|NA|NA	S
g|tr|g230901.t1	Foraminifera	593	2	GloG15_CONTIG33716:1574-1818,2071-2650,2710-2793(-)	ECHDC2	Enoyl-CoA hydratase/isomerase	93383.4	105231	110409	168259	83546.2	84630.6	181186	206487	138254	115975	44541.3	36093.8	96563.8	109339	92663.1	100312	>g|tr|g230901.t1	44689.DDB0233850	9.9e-57	227.3	Amoebozoa	GO:0000288,GO:0000956,GO:0003674,GO:0003676,GO:0003723,GO:0003729,GO:0003730,GO:0003824,GO:0004300,GO:0004490,GO:0005488,GO:0005575,GO:0005622,GO:0005623,GO:0005737,GO:0005739,GO:0005759,GO:0006082,GO:0006139,GO:0006401,GO:0006402,GO:0006520,GO:0006629,GO:0006631,GO:0006635,GO:0006725,GO:0006807,GO:0006950,GO:0008150,GO:0008152,GO:0009056,GO:0009057,GO:0009062,GO:0009063,GO:0009081,GO:0009083,GO:…	4.2.1.18	ko:K05607	ko00280,ko01100,map00280,map01100	M00036	R02085	RC02416	ko00000,ko00001,ko00002,ko01000				Eukaryota	3XEJ4@554915,COG1024@1,KOG1679@2759	NA|NA|NA	I
g|tr|g231238.t1	Foraminifera	1117	1	GloG15_CONTIG33832:3990-4319(+)		Glutamate/Leucine/Phenylalanine/Valine dehydrogenase	2.28196e+06	2.62024e+06	1.78025e+06	2.41615e+06	2.59804e+06	2.00317e+06	1.8475e+06	3.48583e+06	2.92116e+06	2.0311e+06	1.28286e+06	2.3563e+06	2.14093e+06	3.62474e+06	1.79543e+06	1.83372e+06	>g|tr|g231238.t1	51511.ENSCSAVP00000008045	4.9e-30	137.1	Chordata		1.4.1.3,1.4.1.4	ko:K00261,ko:K00262	ko00220,ko00250,ko00471,ko00910,ko01100,ko01200,ko04217,ko04964,map00220,map00250,map00471,map00910,map01100,map01200,map04217,map04964	M00740	R00243,R00248	RC00006,RC02799	ko00000,ko00001,ko00002,ko01000,ko04147				Metazoa	38GEK@33154,3BKKN@33208,3D5YW@33213,48IFU@7711,COG0334@1,KOG2250@2759	NA|NA|NA	E
g|tr|g235819.t1	Foraminifera	598	7	GloG15_CONTIG35510:2766-3081,3150-3379,3442-3801(+)	ARPC2	positive regulation of invadopodium assembly	623224	858316	717341	950042	823405	817237	890071	857767	841904	903596	1.20828e+06	885192	846103	882602	795654	741549	>g|tr|g235819.t1	192875.XP_004349072.1	5.1e-37	161.8	Opisthokonta	GO:0000001,GO:0000147,GO:0000226,GO:0000302,GO:0000902,GO:0001667,GO:0001726,GO:0002009,GO:0002102,GO:0002252,GO:0002253,GO:0002376,GO:0002429,GO:0002431,GO:0002433,GO:0002682,GO:0002684,GO:0002757,GO:0002764,GO:0002768,GO:0003674,GO:0003779,GO:0005102,GO:0005198,GO:0005200,GO:0005488,GO:0005515,GO:0005575,GO:0005622,GO:0005623,GO:0005737,GO:0005768,GO:0005829,GO:0005856,GO:0005884,GO:0005885,GO:…		ko:K05758	ko04144,ko04666,ko04810,ko05100,ko05130,ko05131,ko05132,map04144,map04666,map04810,map05100,map05130,map05131,map05132				ko00000,ko00001,ko04131,ko04812				Opisthokonta	39RNU@33154,COG4690@1,KOG2826@2759	NA|NA|NA	Z
g|tr|g235879.t1	Foraminifera	766	13	GloG15_CONTIG35533:2805-2907,2991-3607(+)		The proteasome is a multicatalytic proteinase complex which is characterized by its ability to cleave peptides with Arg, Phe, Tyr, Leu, and Glu adjacent to the leaving group at neutral or slightly basic pH	1.47116e+06	1.18247e+06	751602	1.04176e+06	1.5166e+06	1.30374e+06	1.54052e+06	1.73662e+06	1.35084e+06	1.17472e+06	920117	1.04773e+06	1.30255e+06	1.284e+06	1.25349e+06	1.15403e+06	>g|tr|g235879.t1	3218.PP1S61_202V6.1	2.1e-70	272.3	Streptophyta	GO:0000502,GO:0005575,GO:0005622,GO:0005623,GO:0005737,GO:0005829,GO:0005839,GO:0005840,GO:0006950,GO:0006952,GO:0008150,GO:0009605,GO:0009607,GO:0009617,GO:0010035,GO:0010038,GO:0010043,GO:0019773,GO:0022626,GO:0032991,GO:0042221,GO:0042742,GO:0043207,GO:0043226,GO:0043228,GO:0043229,GO:0043232,GO:0044424,GO:0044444,GO:0044445,GO:0044464,GO:0050896,GO:0051704,GO:0051707,GO:0098542,GO:1902494,GO:…	3.4.25.1	ko:K02726	ko03050,map03050	M00337,M00340			ko00000,ko00001,ko00002,ko01000,ko01002,ko03051				Viridiplantae	37KKK@33090,3GARF@35493,KOG0181@1,KOG0181@2759	NA|NA|NA	O
g|tr|g236829.t1	Foraminifera	721	2	GloG15_CONTIG35892:2039-2302,2360-2656,2713-2913(-)		structural constituent of cytoskeleton	1.64512e+06	1.25615e+06	1.54147e+06	1.09873e+06	2.3723e+06	1.88034e+06	1.52378e+06	1.70312e+06	1.65596e+06	1.49415e+06	1.17755e+06	1.20571e+06	1.19529e+06	1.19742e+06	1.16036e+06	1.55212e+06	>g|tr|g236829.t1	130081.XP_005704892.1	6.5e-78	297.4	Eukaryota			ko:K07374	ko04145,ko04210,ko04530,ko04540,ko05130,map04145,map04210,map04530,map04540,map05130				ko00000,ko00001,ko03019,ko03036,ko04147,ko04812				Eukaryota	COG5023@1,KOG1376@2759	NA|NA|NA	Z
g|tr|g237710.t1	Foraminifera	834	2	GloG15_CONTIG36228:1384-2031(+)	RAB7A	Rab subfamily of small GTPases	297914	264744	209799	285483	353867	225742	289481	305898	406435	479731	319680	220098	507208	262934	379182	318261	>g|tr|g237710.t1	164328.Phyra71594	6.8e-52	210.7	Peronosporales	GO:0000003,GO:0000011,GO:0000045,GO:0000166,GO:0000306,GO:0000322,GO:0000323,GO:0000324,GO:0000325,GO:0000329,GO:0000407,GO:0001555,GO:0001667,GO:0001775,GO:0001845,GO:0001882,GO:0001883,GO:0001894,GO:0002064,GO:0002065,GO:0002066,GO:0002252,GO:0002263,GO:0002274,GO:0002275,GO:0002283,GO:0002366,GO:0002376,GO:0002443,GO:0002444,GO:0002446,GO:0002478,GO:0002495,GO:0002504,GO:0003002,GO:0003006,GO:…		ko:K07897,ko:K07976	ko04137,ko04138,ko04140,ko04144,ko04145,ko05132,ko05146,ko05152,map04137,map04138,map04140,map04144,map04145,map05132,map05146,map05152				ko00000,ko00001,ko04031,ko04131,ko04147				Eukaryota	3QBMN@4776,KOG0394@1,KOG0394@2759	NA|NA|NA	U
g|tr|g238508.t1	Foraminifera	730	1	GloG15_CONTIG36531:22-367,439-847(-)	gpb-1	Guanine nucleotide-binding proteins (G proteins) are involved as a modulator or transducer in various transmembrane signaling systems. The beta and gamma chains are required for the GTPase activity, for replacement of GDP by GTP, and for G protein- effector interaction. In the early embryo, controls the magnitude of the forces acting on centrosomes but is not required for generating asymmetric fo…	138636	146759	115373	130977	160180	116776	158926	132578	252584	254679	94355	25695.1	293129	51684.2	151789	152030	>g|tr|g238508.t1	34506.g6376	1.2e-44	186.8	Rhabditida	GO:0000132,GO:0000226,GO:0000278,GO:0005575,GO:0005622,GO:0005623,GO:0005834,GO:0005886,GO:0006996,GO:0007010,GO:0007017,GO:0007049,GO:0007163,GO:0007275,GO:0008150,GO:0009790,GO:0009792,GO:0009898,GO:0009987,GO:0016020,GO:0016043,GO:0019897,GO:0019898,GO:0022402,GO:0030010,GO:0031234,GO:0032501,GO:0032502,GO:0032991,GO:0040001,GO:0040012,GO:0040013,GO:0044424,GO:0044425,GO:0044459,GO:0044464,GO:…		ko:K04536	ko04011,ko04014,ko04062,ko04151,ko04371,ko04713,ko04723,ko04724,ko04725,ko04726,ko04727,ko04728,ko04740,ko04744,ko04926,ko05032,ko05034,ko05167,ko05200,map04011,map04014,map04062,map04151,map04371,map04713,map04723,map04724,map04725,map04726,map04727,map04728,map04740,map04744,map04926,map05032,map05034,map05167,map05200				ko00000,ko00001,ko04031,ko04147				Nematoda	1KUFA@119089,38C52@33154,3B9ME@33208,3CVIP@33213,40BQB@6231,40WGV@6236,KOG0286@1,KOG0286@2759	NA|NA|NA	S
g|tr|g239203.t1	Foraminifera	203	1	GloG15_CONTIG36800:683-887,946-1000,1064-2375(+)	accD1	COG4799 Acetyl-CoA carboxylase, carboxyltransferase component (subunits alpha and beta)	116496	226702	353795	372893	230243	164076	429389	268552	291478	464624	176021	80115.4	590978	163031	193877	163032	>g|tr|g239203.t1	1117647.M5M_10065	2.5e-196	691.8	unclassified Gammaproteobacteria		6.4.1.4,6.4.1.5	ko:K01969,ko:K13778	ko00280,ko00281,ko01100,map00280,map00281,map01100	M00036	R03494,R04138	RC00367,RC00942	ko00000,ko00001,ko00002,ko01000				Bacteria	1J5DI@118884,1MVAX@1224,1RNV5@1236,COG4799@1,COG4799@2	NA|NA|NA	I
g|tr|g239270.t1	Foraminifera	458	1	GloG15_CONTIG36825:851-1924(+)	DLST	dihydrolipoyllysine-residue succinyltransferase activity	44228.9	94133.7	1407.65	40489.2	77245.5	121161	293392	32902.4	43610.5	110076	6414.3	1269.08	115027	10733.2	71230.7	80298.1	>g|tr|g239270.t1	227086.JGI_V11_34620	5.8e-80	304.7	Eukaryota	GO:0000002,GO:0003674,GO:0003824,GO:0004149,GO:0005488,GO:0005515,GO:0005575,GO:0005622,GO:0005623,GO:0005634,GO:0005737,GO:0005739,GO:0005759,GO:0005886,GO:0005947,GO:0006082,GO:0006091,GO:0006099,GO:0006101,GO:0006103,GO:0006104,GO:0006139,GO:0006163,GO:0006464,GO:0006637,GO:0006725,GO:0006732,GO:0006733,GO:0006734,GO:0006753,GO:0006790,GO:0006793,GO:0006796,GO:0006807,GO:0006996,GO:0007005,GO:…	2.3.1.61	ko:K00658	ko00020,ko00310,ko01100,ko01110,ko01120,ko01130,ko01200,map00020,map00310,map01100,map01110,map01120,map01130,map01200	M00009,M00011,M00032	R02570,R02571,R08549	RC00004,RC02727,RC02833	br01601,ko00000,ko00001,ko00002,ko01000				Eukaryota	COG0508@1,KOG0559@2759	NA|NA|NA	C
g|tr|g240115.t1	Foraminifera	327	14	GloG15_CONTIG37147:1-28,119-1378(+)	CCT5	unfolded protein binding	459928	785415	355985	608366	672589	798512	1.27787e+06	736991	612250	726061	305465	269903	799938	514762	449845	610647	>g|tr|g240115.t1	112098.XP_008607054.1	9.4e-154	550.1	Eukaryota	GO:0003674,GO:0005488,GO:0005515,GO:0005575,GO:0005622,GO:0005623,GO:0005737,GO:0005829,GO:0005832,GO:0005886,GO:0005911,GO:0006457,GO:0006458,GO:0008150,GO:0009506,GO:0009987,GO:0016020,GO:0030054,GO:0032991,GO:0044183,GO:0044424,GO:0044444,GO:0044445,GO:0044464,GO:0051082,GO:0055044,GO:0061077,GO:0071944,GO:0101031		ko:K09497					ko00000,ko03036,ko03110,ko04147				Eukaryota	COG0459@1,KOG0357@2759	NA|NA|NA	O
g|tr|g240982.t1	Foraminifera	292	3	GloG15_CONTIG37462:423-469,531-579,643-948,1010-1969(+)	ALDH7A1	Aldehyde dehydrogenase family 7 member A1. Source PGD	251860	586058	174741	546493	468211	713759	936377	316947	368396	516438	216481	215381	620165	282662	540294	431114	>g|tr|g240982.t1	65071.PYU1_T005197	7.9e-159	567.0	Pythiales	GO:0001101,GO:0001505,GO:0003008,GO:0003674,GO:0003824,GO:0004029,GO:0004043,GO:0005575,GO:0005622,GO:0005623,GO:0005737,GO:0005739,GO:0005759,GO:0005829,GO:0006081,GO:0006082,GO:0006520,GO:0006553,GO:0006554,GO:0006576,GO:0006807,GO:0006950,GO:0006970,GO:0007600,GO:0007605,GO:0008150,GO:0008152,GO:0008802,GO:0009056,GO:0009063,GO:0009066,GO:0009068,GO:0009269,GO:0009308,GO:0009310,GO:0009414,GO:…	1.2.1.3,1.2.1.31,1.2.1.8	ko:K14085	ko00010,ko00053,ko00071,ko00260,ko00280,ko00310,ko00330,ko00340,ko00380,ko00410,ko00561,ko00620,ko01100,ko01110,ko01120,ko01130,map00010,map00053,map00071,map00260,map00280,map00310,map00330,map00340,map00380,map00410,map00561,map00620,map01100,map01110,map01120,map01130	M00032,M00135	R00631,R00710,R00904,R01752,R01986,R02549,R02565,R02566,R02678,R02940,R02957,R03102,R03103,R03283,R03869,R04065,R04506,R04903,R05050	RC00047,RC00071,RC00080,RC00186,RC00242,RC00816	ko00000,ko00001,ko00002,ko01000				Eukaryota	1MAPY@121069,COG1012@1,KOG2453@2759	NA|NA|NA	C
g|tr|g242187.t1	Foraminifera	1025	1	GloG15_CONTIG37941:687-879,972-1088,1148-1200,1271-1378(-)			1.00334e+06	1.09246e+06	883791	875579	992859	1.0178e+06	1.00681e+06	874382	1.38755e+06	1.12781e+06	1.03492e+06	827760	1.23942e+06	965500	1.13292e+06	1.08461e+06	>g|tr|g242187.t1	72019.SARC_10396T0	3.3e-24	118.2	Opisthokonta												Opisthokonta	29ZXH@1,2RXX9@2759,3A0D7@33154	NA|NA|NA
g|tr|g242827.t1	Foraminifera	44	1	GloG15_CONTIG38197:914-2664,2723-3498,3557-3795(-)		von Willebrand factor, type A	157025	97361.6	267390	204219	61416.5	50836.4	161411	130820	148264	37632.9	29893.9	58494	22423.6	18534.2	83436.9	45431.8	>g|tr|g242827.t1	1033806.HTIA_p2803	5.9e-68	266.2	Halobacteria			ko:K07114					ko00000,ko02000	1.A.13.2.2,1.A.13.2.3			Archaea	23UCF@183963,2XUQF@28890,COG0568@1,COG2304@1,arCOG02900@2157,arCOG04588@2157	NA|NA|NA	K
g|tr|g244369.t1	Foraminifera	208	5	GloG15_CONTIG38805:238-743,809-1089,1286-2049(+)		Aldehyde dehydrogenase family	442566	435126	324681	498721	329639	511620	464906	508440	522678	338097	506392	356105	399602	358781	752205	518044	>g|tr|g244369.t1	981085.XP_010100483.1	7.4e-129	467.6	Streptophyta	GO:0000166,GO:0003674,GO:0003824,GO:0004029,GO:0005488,GO:0005524,GO:0005575,GO:0005622,GO:0005623,GO:0005737,GO:0005739,GO:0008144,GO:0008150,GO:0008152,GO:0009507,GO:0009536,GO:0010035,GO:0010038,GO:0016491,GO:0016620,GO:0016903,GO:0017076,GO:0030554,GO:0032553,GO:0032555,GO:0032559,GO:0035639,GO:0036094,GO:0042221,GO:0043167,GO:0043168,GO:0043226,GO:0043227,GO:0043229,GO:0043231,GO:0044424,GO:…	1.2.1.3	ko:K00128	ko00010,ko00053,ko00071,ko00280,ko00310,ko00330,ko00340,ko00380,ko00410,ko00561,ko00620,ko00625,ko00903,ko00981,ko01100,ko01110,ko01120,ko01130,map00010,map00053,map00071,map00280,map00310,map00330,map00340,map00380,map00410,map00561,map00620,map00625,map00903,map00981,map01100,map01110,map01120,map01130	M00135	R00264,R00631,R00710,R00904,R01752,R01986,R02549,R02678,R02940,R02957,R03283,R03869,R04065,R04506,R04903,R05050,R05237,R05238,R05286,R06366,R08146	RC00047,RC00071,RC00080,RC00186,RC00218,RC00242,RC00816,RC01500	ko00000,ko00001,ko00002,ko01000				Viridiplantae	37KEV@33090,3GBEC@35493,COG1012@1,KOG2450@2759	NA|NA|NA	C
g|tr|g244386.t1	Foraminifera	391	1	GloG15_CONTIG38812:2347-3130,3198-3589(-)		isocitrate dehydrogenase (NAD+) activity	930291	1.13316e+06	732945	715762	1.08954e+06	1.0418e+06	1.14541e+06	997102	886531	799349	1.14096e+06	1.76236e+06	899421	842732	1.04939e+06	874416	>g|tr|g244386.t1	81824.XP_001742858.1	2.3e-82	312.8	Opisthokonta		1.1.1.41	ko:K00030	ko00020,ko01100,ko01110,ko01120,ko01130,ko01200,ko01210,ko01230,map00020,map01100,map01110,map01120,map01130,map01200,map01210,map01230	M00009,M00010	R00709	RC00114	br01601,ko00000,ko00001,ko00002,ko01000				Opisthokonta	38CQA@33154,COG0473@1,KOG0785@2759	NA|NA|NA	C
g|tr|g245383.t1	Foraminifera	331	1	GloG15_CONTIG39206:2266-3540(-)	PSMD11	proteasome assembly	1.56802e+06	1.24156e+06	1.20299e+06	1.19136e+06	1.09215e+06	2.01865e+06	1.86083e+06	1.61133e+06	1.78884e+06	1.14988e+06	621115	474853	1.75436e+06	1.04276e+06	1.45921e+06	1.634e+06	>g|tr|g245383.t1	7739.XP_002589512.1	5.4e-93	348.2	Chordata	GO:0000502,GO:0001775,GO:0002252,GO:0002263,GO:0002274,GO:0002275,GO:0002283,GO:0002366,GO:0002376,GO:0002443,GO:0002444,GO:0002446,GO:0003674,GO:0005198,GO:0005488,GO:0005515,GO:0005575,GO:0005576,GO:0005622,GO:0005623,GO:0005634,GO:0005654,GO:0005737,GO:0005829,GO:0005838,GO:0006464,GO:0006508,GO:0006511,GO:0006807,GO:0006810,GO:0006887,GO:0006955,GO:0007275,GO:0007568,GO:0008150,GO:0008152,GO:…		ko:K03036	ko03050,ko05169,map03050,map05169	M00341			ko00000,ko00001,ko00002,ko03051				Metazoa	38GDJ@33154,3BD3J@33208,3CSIM@33213,487YX@7711,COG5159@1,KOG1463@2759	NA|NA|NA	O
g|tr|g245463.t1	Foraminifera	857	1	GloG15_CONTIG39238:3287-3640,3701-3979(+)		Belongs to the SNF7 family	45522.5	83684.7	42004.9	76410.5	46086.4	84507.1	97105.3	106258	35159.7	102049	36586.6	117011	108691	82856.3	121009	102669	>g|tr|g245463.t1	5679.XP_010702849.1	8.5e-31	140.6	Kinetoplastida			ko:K12197	ko04144,ko04217,map04144,map04217	M00412			ko00000,ko00001,ko00002,ko04131,ko04147				Eukaryota	3XSD2@5653,COG5491@1,KOG3232@2759	NA|NA|NA	U
g|tr|g246114.t1	Foraminifera	778	3	GloG15_CONTIG39494:399-753,844-1196(+)			1.83789e+06	2.28989e+06	1.37615e+06	2.53054e+06	2.44261e+06	2.99974e+06	4.33949e+06	1.66171e+06	1.72771e+06	2.52692e+06	1.19718e+06	916984	3.11499e+06	1.31286e+06	1.93524e+06	1.85664e+06
g|tr|g246452.t1	Foraminifera	344	2	GloG15_CONTIG39633:426-1169,1274-1774(+)		26S proteasome non-ATPase regulatory subunit 13	633009	599215	535558	550949	558159	659400	739029	679610	690843	481821	550581	444005	625558	697590	590823	594458	>g|tr|g246452.t1	3218.PP1S66_117V6.1	1.2e-41	177.6	Streptophyta	GO:0000502,GO:0003674,GO:0005198,GO:0005575,GO:0005622,GO:0005623,GO:0005634,GO:0005737,GO:0005829,GO:0005838,GO:0006508,GO:0006511,GO:0006807,GO:0008150,GO:0008152,GO:0008541,GO:0009056,GO:0009057,GO:0009987,GO:0016043,GO:0019538,GO:0019941,GO:0022607,GO:0022624,GO:0030163,GO:0032991,GO:0034622,GO:0043170,GO:0043226,GO:0043227,GO:0043229,GO:0043231,GO:0043248,GO:0043632,GO:0043933,GO:0044085,GO:…		ko:K03039	ko03050,ko05169,map03050,map05169	M00341			ko00000,ko00001,ko00002,ko03051				Viridiplantae	37JMT@33090,3GDFT@35493,KOG2908@1,KOG2908@2759	NA|NA|NA	O
g|tr|g246737.t1	Foraminifera	62	1	GloG15_CONTIG39748:1100-1381,1445-2357,2428-3608(+)	ptrB	Prolyl oligopeptidase, N-terminal beta-propeller domain	41792	202296	212602	225702	167302	182202	298696	100444	96465.3	105924	15668.3	46869.9	21538.4	46519.5	26788.4	25230.7	>g|tr|g246737.t1	98439.AJLL01000010_gene1388	5.9e-194	684.5	Stigonemataceae	GO:0003674,GO:0003824,GO:0004175,GO:0004252,GO:0005575,GO:0005622,GO:0005623,GO:0005737,GO:0006508,GO:0006807,GO:0008150,GO:0008152,GO:0008233,GO:0008236,GO:0016787,GO:0017171,GO:0019538,GO:0043170,GO:0044238,GO:0044424,GO:0044464,GO:0070011,GO:0070012,GO:0071704,GO:0140096,GO:1901564	3.4.21.83	ko:K01354	ko05142,ko05143,map05142,map05143				ko00000,ko00001,ko01000,ko01002				Bacteria	1G1RH@1117,1JHGU@1189,COG1770@1,COG1770@2	NA|NA|NA	E
g|tr|g249235.t1	Foraminifera	41	2	GloG15_CONTIG40747:487-770,853-1433,1627-2664,2723-3747(+)			32805	39754.2	17412.3	40702.4	20307	21412.8	38938.6	15872.5	28521.5	46246.1	51827	205811	34771.1	42835.9	26136.7	66841.9	>g|tr|g249235.t1	35128.Thaps8273	6.5e-41	176.4	Bacillariophyta												Eukaryota	2CINB@1,2SVCS@2759,2XH6X@2836	NA|NA|NA
g|tr|g250525.t1	Foraminifera	835	4	GloG15_CONTIG41274:596-997,1092-1337(-)		Domain in cystathionine beta-synthase and other proteins.	809870	643564	796667	640887	632427	735600	678237	1.00874e+06	867386	953478	405440	278169	1.10089e+06	697173	831166	721587	>g|tr|g250525.t1	157072.XP_008874263.1	6.5e-10	71.2	Eukaryota	GO:0003674,GO:0005488,GO:0005575,GO:0005622,GO:0005623,GO:0005737,GO:0005739,GO:0006950,GO:0006970,GO:0008150,GO:0009628,GO:0009651,GO:0009987,GO:0019725,GO:0042592,GO:0043167,GO:0043169,GO:0043226,GO:0043227,GO:0043229,GO:0043231,GO:0044424,GO:0044444,GO:0044464,GO:0045454,GO:0046872,GO:0046914,GO:0050789,GO:0050794,GO:0050896,GO:0050897,GO:0065007,GO:0065008											Eukaryota	2QQ7J@2759,COG0517@1	NA|NA|NA	S
g|tr|g251477.t1	Foraminifera	928	3	GloG15_CONTIG41670:2978-3550(-)	paaF	enoyl-CoA hydratase isomerase family	313712	679904	449968	661297	402514	518237	647808	579159	609636	466561	396283	698780	694990	747781	535079	671386	>g|tr|g251477.t1	331869.BAL199_10180	9.9e-63	246.5	unclassified Alphaproteobacteria		4.2.1.17	ko:K01692,ko:K01715	ko00071,ko00280,ko00281,ko00310,ko00360,ko00362,ko00380,ko00410,ko00627,ko00640,ko00650,ko00903,ko00930,ko01100,ko01110,ko01120,ko01130,ko01200,ko01212,map00071,map00280,map00281,map00310,map00360,map00362,map00380,map00410,map00627,map00640,map00650,map00903,map00930,map01100,map01110,map01120,map01130,map01200,map01212	M00032,M00087	R03026,R03045,R04137,R04170,R04204,R04224,R04738,R04740,R04744,R04746,R04749,R05595,R06411,R06412,R06942,R08093	RC00831,RC00834,RC01086,RC01095,RC01098,RC01103,RC01217,RC02115	ko00000,ko00001,ko00002,ko01000				Bacteria	1MWZC@1224,2TRYS@28211,4BPKP@82117,COG1024@1,COG1024@2	NA|NA|NA	I
g|tr|g252186.t1	Foraminifera	531	2	GloG15_CONTIG41970:852-914,977-1433,1490-1941(+)		reductase	116308	180608	102788	158902	126063	133906	166623	223308	134718	113704	16345.7	13645.7	30462.8	95869.5	135946	93741.4	>g|tr|g252186.t1	44689.DDB0215363	3.9e-59	235.3	Amoebozoa	GO:0003674,GO:0003824,GO:0004032,GO:0004033,GO:0005575,GO:0005622,GO:0005623,GO:0005737,GO:0005829,GO:0006928,GO:0006950,GO:0006979,GO:0008106,GO:0008150,GO:0008152,GO:0009987,GO:0010646,GO:0016491,GO:0016614,GO:0016616,GO:0016903,GO:0031156,GO:0031157,GO:0031158,GO:0032101,GO:0032104,GO:0032107,GO:0033500,GO:0040011,GO:0042592,GO:0042593,GO:0043795,GO:0043900,GO:0044424,GO:0044444,GO:0044464,GO:…	1.1.1.2,1.1.1.21,1.1.1.307	ko:K00002,ko:K00011,ko:K17743	ko00010,ko00040,ko00051,ko00052,ko00561,ko00790,ko00930,ko01100,ko01110,ko01120,ko01130,ko01220,map00010,map00040,map00051,map00052,map00561,map00790,map00930,map01100,map01110,map01120,map01130,map01220	M00014	R00746,R01036,R01041,R01093,R01095,R01431,R01481,R01758,R01759,R01787,R02531,R02577,R04285,R05231,R09477,R11764	RC00087,RC00088,RC00099,RC00108,RC00133,RC00205,RC00670	ko00000,ko00001,ko00002,ko01000,ko04147				Eukaryota	3X82R@554915,COG0656@1,KOG1577@2759	NA|NA|NA	S
g|tr|g252896.t1	Foraminifera	882	7	GloG15_CONTIG42265:2339-2610,2689-3028(-)			1.04959e+06	1.22648e+06	1.03985e+06	1.20485e+06	1.34957e+06	1.99644e+06	2.92585e+06	1.06516e+06	871246	1.30833e+06	963303	649947	1.79018e+06	965159	1.32452e+06	1.31601e+06
g|tr|g253465.t1	Foraminifera	89	2	GloG15_CONTIG42490:1-2114(+)	ACC1	Acetyl-CoA carboxylase, central region	355379	315967	371622	268021	342474	399052	448793	330596	426951	398821	473207	231880	518049	259991	400924	344094	>g|tr|g253465.t1	40559.M7TMZ7	2.8e-139	502.7	Leotiomycetes	GO:0000166,GO:0001676,GO:0003674,GO:0003824,GO:0003989,GO:0004075,GO:0005488,GO:0005524,GO:0005575,GO:0005622,GO:0005623,GO:0005737,GO:0005739,GO:0005783,GO:0005789,GO:0005829,GO:0006082,GO:0006606,GO:0006629,GO:0006631,GO:0006633,GO:0006810,GO:0006886,GO:0006913,GO:0006996,GO:0006997,GO:0006998,GO:0008104,GO:0008144,GO:0008150,GO:0008152,GO:0008610,GO:0009058,GO:0009987,GO:0010256,GO:0012505,GO:…	2.1.3.15,6.3.4.14,6.4.1.2	ko:K11262	ko00061,ko00254,ko00620,ko00640,ko01100,ko01110,ko01212,ko04152,ko04910,ko04922,map00061,map00254,map00620,map00640,map01100,map01110,map01212,map04152,map04910,map04922	M00082	R00742,R04385,R04386	RC00040,RC00253,RC00367	ko00000,ko00001,ko00002,ko01000				Fungi	20WSN@147548,38BBT@33154,3NUU6@4751,3QJKI@4890,COG0439@1,KOG0368@2759	NA|NA|NA	I
g|tr|g254058.t1	Foraminifera	1001	3	GloG15_CONTIG42722:1540-2037(-)			926603	794343	1.04074e+06	952327	906777	842146	641947	622355	1.19976e+06	913102	303628	284143	864405	460561	1.12024e+06	865429
g|tr|g254186.t1	Foraminifera	714	4	GloG15_CONTIG42781:2455-2833,2914-3302(+)	PBA1	The proteasome is a multicatalytic proteinase complex which is characterized by its ability to cleave peptides with Arg, Phe, Tyr, Leu, and Glu adjacent to the leaving group at neutral or slightly basic pH	889775	598620	321782	576832	762895	780271	1.01019e+06	1.06369e+06	908273	798694	692309	515418	754785	731461	939920	685163	>g|tr|g254186.t1	2850.Phatr51691	9.5e-53	213.8	Bacillariophyta	GO:0000502,GO:0005575,GO:0005622,GO:0005623,GO:0005839,GO:0019774,GO:0032991,GO:0044424,GO:0044464,GO:1902494,GO:1905368,GO:1905369	3.4.25.1	ko:K02738,ko:K11507	ko03050,map03050	M00340			ko00000,ko00001,ko00002,ko01000,ko01002,ko03036,ko03051				Eukaryota	2XAEF@2836,KOG0174@1,KOG0174@2759	NA|NA|NA	O
g|tr|g254223.t1	Foraminifera	1109	5	GloG15_CONTIG42797:265-359,416-534,597-649,717-772,833-863(-)	FMN1	IDI-7. Source PGD	223253	379879	314515	389258	328965	283010	294869	315945	249040	424200	382863	344995	484834	353554	143037	347824	>g|tr|g254223.t1	115417.EPrPW00000014505	8e-47	193.0	Pythiales	GO:0000003,GO:0000045,GO:0000139,GO:0000149,GO:0000322,GO:0000323,GO:0000324,GO:0000329,GO:0000407,GO:0000421,GO:0000422,GO:0002790,GO:0003674,GO:0005488,GO:0005515,GO:0005543,GO:0005575,GO:0005622,GO:0005623,GO:0005737,GO:0005773,GO:0005774,GO:0005776,GO:0005794,GO:0005829,GO:0006605,GO:0006623,GO:0006810,GO:0006886,GO:0006888,GO:0006891,GO:0006914,GO:0006950,GO:0006979,GO:0006995,GO:0006996,GO:…		ko:K08341,ko:K10367,ko:K13335,ko:K16578	ko04068,ko04136,ko04137,ko04138,ko04139,ko04140,ko04146,ko04212,ko04371,ko04621,ko04727,ko05167,map04068,map04136,map04137,map04138,map04139,map04140,map04146,map04212,map04371,map04621,map04727,map05167				ko00000,ko00001,ko03029,ko03036,ko04121,ko04131,ko04812	3.A.20.1,9.A.17.1			Eukaryota	1MH8F@121069,KOG1654@1,KOG1654@2759	NA|NA|NA	Z
g|tr|g254469.t1	Foraminifera	241	3	GloG15_CONTIG42896:1892-2208,2268-3358,3417-3481(-)		structural constituent of cytoskeleton	230455	245159	181036	204663	288663	228540	173290	245977	251633	246706	348070	127632	220535	309257	396152	268479	>g|tr|g254469.t1	45157.CMT504CT	4.2e-113	415.2	Eukaryota			ko:K07374	ko04145,ko04210,ko04530,ko04540,ko05130,map04145,map04210,map04530,map04540,map05130				ko00000,ko00001,ko03019,ko03036,ko04147,ko04812				Eukaryota	COG5023@1,KOG1376@2759	NA|NA|NA	Z
g|tr|g254803.t1	Foraminifera	705	5	GloG15_CONTIG43037:1732-2409,2480-2578(-)		Belongs to the short-chain dehydrogenases reductases (SDR) family	893444	759648	480170	599260	844874	1.32563e+06	1.43727e+06	703368	717639	884851	608872	655741	993728	588360	964549	1.07348e+06	>g|tr|g254803.t1	266117.Rxyl_1736	7.3e-77	293.9	Rubrobacteria												Bacteria	2GNUM@201174,4CPHJ@84995,COG1028@1,COG1028@2	NA|NA|NA	IQ
g|tr|g255157.t1	Foraminifera	711	1	GloG15_CONTIG43177:1-48,107-640,711-896(-)		tRNA synthetases class II (D, K and N)	21341.4	325409	31826.2	254218	212159	128775	359064	197504	94705.8	259764	278683	268305	419808	232932	57683.7	194407	>g|tr|g255157.t1	2850.Phatr42051	7.1e-40	171.0	Bacillariophyta		6.1.1.12	ko:K22503	ko00970,map00970	M00359	R05577	RC00055,RC00523	ko00000,ko00001,ko01000,ko01007,ko03016			iRC1080.CRv4_Au5_s6_g12982_t1	Eukaryota	2XBSM@2836,COG0017@1,KOG0556@2759	NA|NA|NA	J
g|tr|g256162.t1-g|tr|g813476.t1(73.33%)	Foraminifera	594	15	GloG15_CONTIG521148:231-773(-)	TIF1	Type III restriction enzyme, res subunit	929661	1.08431e+06	1.58356e+06	1.40009e+06	1.11192e+06	1.36846e+06	1.45208e+06	1.06637e+06	1.01009e+06	1.06174e+06	1.07119e+06	901369	1.16658e+06	1.00842e+06	1.04358e+06	1.2119e+06	>g|tr|g256162.t1	5334.XP_003035589.1	5.2e-98	364.4	Agaricales	GO:0002181,GO:0002183,GO:0003674,GO:0003676,GO:0003723,GO:0003724,GO:0003743,GO:0003824,GO:0004004,GO:0004386,GO:0005488,GO:0005575,GO:0005622,GO:0005623,GO:0005634,GO:0005730,GO:0005737,GO:0005829,GO:0005840,GO:0005886,GO:0006139,GO:0006412,GO:0006413,GO:0006417,GO:0006446,GO:0006518,GO:0006725,GO:0006807,GO:0008026,GO:0008135,GO:0008150,GO:0008152,GO:0008186,GO:0009058,GO:0009059,GO:0009889,GO:…		ko:K03257	ko03013,map03013	M00428			ko00000,ko00001,ko00002,ko03012,ko03019,ko04147				Fungi	225PH@155619,38CTS@33154,3NUYA@4751,3V00X@5204,3W355@5338,COG0513@1,KOG0327@2759	NA|NA|NA	A
g|tr|g257564.t1	Foraminifera	128	2	GloG15_CONTIG44161:254-1842,1899-1908,1968-2077,2159-2339(-)	ILVBL	thiamine pyrophosphate binding	430552	666086	1.6317e+06	848695	508046	933042	929382	970837	956565	821754	478223	1.26593e+06	1.3666e+06	894052	545735	913122	>g|tr|g257564.t1	192875.XP_004365119.1	1.7e-135	490.0	Opisthokonta	GO:0001501,GO:0005575,GO:0007275,GO:0008150,GO:0009653,GO:0009790,GO:0009792,GO:0009887,GO:0016020,GO:0032501,GO:0032502,GO:0043009,GO:0048513,GO:0048562,GO:0048568,GO:0048598,GO:0048701,GO:0048704,GO:0048705,GO:0048706,GO:0048731,GO:0048856,GO:1904888		ko:K11259					ko00000,ko01000				Opisthokonta	38EFU@33154,COG0028@1,KOG1185@2759	NA|NA|NA	EH
g|tr|g257713.t1	Foraminifera	64	19	GloG15_CONTIG44225:420-1647,1717-2339,2392-2455,2529-2831,2898-3028(-)		Pyrophosphate-energized vacuolar membrane proton pump	2.68986e+06	2.38406e+06	1.84869e+06	2.21887e+06	1.47965e+06	1.50113e+06	1.40888e+06	2.37167e+06	3.21572e+06	2.0694e+06	1.68792e+06	1.48948e+06	1.67711e+06	3.01051e+06	2.53873e+06	2.33105e+06	>g|tr|g257713.t1	4098.XP_009630144.1	2.9e-193	682.2	asterids	GO:0000325,GO:0001101,GO:0003674,GO:0003824,GO:0005215,GO:0005575,GO:0005622,GO:0005623,GO:0005737,GO:0005739,GO:0005768,GO:0005773,GO:0005774,GO:0005794,GO:0005886,GO:0006810,GO:0006811,GO:0006950,GO:0006970,GO:0007275,GO:0008150,GO:0009414,GO:0009415,GO:0009507,GO:0009526,GO:0009536,GO:0009628,GO:0009651,GO:0009678,GO:0009705,GO:0009914,GO:0009926,GO:0009941,GO:0010008,GO:0010035,GO:0010248,GO:…	3.6.1.1	ko:K01507	ko00190,map00190				ko00000,ko00001,ko01000				Viridiplantae	2QPJC@2759,37HW9@33090,3G71T@35493,44P49@71274,COG3808@1	NA|NA|NA	C
g|tr|g257924.t1	Foraminifera	143	2	GloG15_CONTIG44316:1561-2025,2101-3361,3639-3709(+)			366461	794753	854408	814750	528448	571293	672139	600965	544914	646565	519478	338106	825911	606294	455749	498432
g|tr|g260636.t1	Foraminifera	359	11	GloG15_CONTIG45443:1217-1883,2852-3408(-)		phosphopyruvate hydratase activity	4.6769e+06	4.21805e+06	3.46054e+06	4.62092e+06	3.85256e+06	4.56022e+06	3.58317e+06	3.75364e+06	5.01283e+06	4.74581e+06	4.77895e+06	3.86776e+06	5.0339e+06	5.46759e+06	5.61948e+06	5.43945e+06	>g|tr|g260636.t1	4006.Lus10003374	7.6e-52	211.5	fabids	GO:0001101,GO:0003674,GO:0003676,GO:0003677,GO:0003824,GO:0004634,GO:0005488,GO:0005507,GO:0005575,GO:0005576,GO:0005622,GO:0005623,GO:0005634,GO:0005737,GO:0005739,GO:0005740,GO:0005829,GO:0005886,GO:0005911,GO:0006950,GO:0006970,GO:0008150,GO:0009266,GO:0009314,GO:0009409,GO:0009416,GO:0009506,GO:0009507,GO:0009536,GO:0009628,GO:0009651,GO:0009719,GO:0009725,GO:0009737,GO:0010033,GO:0010035,GO:…	4.2.1.11	ko:K01689	ko00010,ko00680,ko01100,ko01110,ko01120,ko01130,ko01200,ko01230,ko03018,ko04066,map00010,map00680,map01100,map01110,map01120,map01130,map01200,map01230,map03018,map04066	M00001,M00002,M00003,M00346,M00394	R00658	RC00349	ko00000,ko00001,ko00002,ko01000,ko03019,ko04147				Viridiplantae	37JMA@33090,3G9BD@35493,4JMBP@91835,COG0148@1,KOG2670@2759	NA|NA|NA	G
g|tr|g260978.t1	Foraminifera	862	4	GloG15_CONTIG45593:2109-2129,2195-2297,2358-2505,2561-2915(+)	SODB1	oxidoreductase activity, acting on superoxide radicals as acceptor	1.50522e+06	1.79746e+06	835211	1.48359e+06	1.59794e+06	1.46456e+06	1.93578e+06	1.45751e+06	1.44046e+06	985388	1.69365e+06	2.19632e+06	1.94149e+06	1.41649e+06	1.30212e+06	1.93498e+06	>g|tr|g260978.t1	529818.AMSG_10676T0	2.3e-49	202.2	Eukaryota		1.15.1.1	ko:K04564	ko04013,ko04068,ko04146,ko04211,ko04212,ko04213,ko05016,map04013,map04068,map04146,map04211,map04212,map04213,map05016				ko00000,ko00001,ko01000				Eukaryota	COG0605@1,KOG0876@2759	NA|NA|NA	P
g|tr|g261571.t1-g|tr|g261498.t1(71.68%)-tr|302179433|gb|ADK98508.1|(71.85%)-tr|343485953|dbj|BAK61735.1|(71.96%)-tr|134142161|gb|ABO61424.1|(73.47%)-tr|508737360|dbj|BAN33743.1|(74.01%)-tr|508737358|dbj|BAN33742.1|(74.86%)-tr|134142195|gb|ABO61441.1|(75.00%)-tr|B7G0C3|B7G0C3_PHATC(75.17%)-tr|398372874|gb|AFO84295.1|(76.24%)-tr|B8C832|B8C832_THAPS(76.77%)-tr|66932471|gb|AAY58157.1|(83.50%)-tr|6693…	Both	286	53	Tubulin alpha OS=Thalassiosira pseudonana GN=TUB1 PE=3 SV=1	TUA2	Tubulin is the major constituent of microtubules. It binds two moles of GTP, one at an exchangeable site on the beta chain and one at a non-exchangeable site on the	1.18697e+07	9.8876e+06	9.97986e+06	1.03936e+07	1.60761e+07	3.06755e+07	3.3298e+07	1.55309e+07	8.74208e+06	9.84812e+06	4.46499e+06	7.61173e+06	2.37325e+07	8.58869e+06	1.92751e+07	1.45164e+07	>g|tr|g261571.t1	248742.XP_005651460.1	2.9e-217	761.1	Chlorophyta	GO:0005575,GO:0005622,GO:0005623,GO:0005856,GO:0043226,GO:0043228,GO:0043229,GO:0043232,GO:0044424,GO:0044464		ko:K07374	ko04145,ko04210,ko04530,ko04540,ko05130,map04145,map04210,map04530,map04540,map05130				ko00000,ko00001,ko03019,ko03036,ko04147,ko04812				Viridiplantae	34GYC@3041,37JG4@33090,COG5023@1,KOG1376@2759	NA|NA|NA	Z
g|tr|g261607.t1	Foraminifera	219	1	GloG15_CONTIG45865:648-1160,1215-1904,2232-2555(+)		G-protein beta/gamma-subunit complex binding	245067	149731	209565	157979	121500	188770	194720	182309	315411	191426	50466.5	216981	289330	77639.9	286208	297230	>g|tr|g261607.t1	227086.JGI_V11_54056	1.4e-66	260.8	Eukaryota												Eukaryota	KOG0082@1,KOG0082@2759	NA|NA|NA	V
g|tr|g261735.t1	Foraminifera	973	3	GloG15_CONTIG45917:987-1218,1300-1601(+)			72751.9	320796	217974	293037	253293	374764	400422	131561	129162	1.15833e+06	228087	75213.7	963186	156859	168835	207659	>g|tr|g261735.t1	65071.PYU1_T014464	4.5e-17	94.7	Pythiales	GO:0003674,GO:0003676,GO:0003723,GO:0003729,GO:0005488,GO:0005575,GO:0005622,GO:0005623,GO:0005737,GO:0005829,GO:0044424,GO:0044444,GO:0044464,GO:0097159,GO:1901363		ko:K07466	ko03030,ko03420,ko03430,ko03440,ko03460,map03030,map03420,map03430,map03440,map03460	M00288			ko00000,ko00001,ko00002,ko03000,ko03032,ko03400				Eukaryota	1MGZU@121069,2A1PQ@1,2S0IA@2759	NA|NA|NA
g|tr|g262058.t1	Foraminifera	1096	4	GloG15_CONTIG46048:2926-3300(-)	PRDX4	negative regulation of male germ cell proliferation	2.3963e+06	2.66405e+06	1.5909e+06	2.41862e+06	2.41844e+06	3.05119e+06	3.08004e+06	2.06522e+06	2.17276e+06	2.18851e+06	1.55126e+06	1.3133e+06	3.14676e+06	2.0469e+06	2.55972e+06	3.19139e+06	>g|tr|g262058.t1	27923.ML04054a-PA	1.7e-31	142.1	Metazoa	GO:0000003,GO:0001775,GO:0002252,GO:0002263,GO:0002274,GO:0002275,GO:0002283,GO:0002366,GO:0002376,GO:0002443,GO:0002444,GO:0002446,GO:0003006,GO:0003674,GO:0003824,GO:0004601,GO:0005488,GO:0005515,GO:0005575,GO:0005576,GO:0005615,GO:0005622,GO:0005623,GO:0005737,GO:0005783,GO:0005790,GO:0005829,GO:0006082,GO:0006457,GO:0006464,GO:0006468,GO:0006520,GO:0006575,GO:0006793,GO:0006796,GO:0006807,GO:…	1.11.1.15	ko:K03386	ko04214,map04214				ko00000,ko00001,ko01000,ko04147				Metazoa	38B9P@33154,3BGS4@33208,COG0450@1,KOG0852@2759	NA|NA|NA	O
g|tr|g262640.t1	Foraminifera	1127	6	GloG15_CONTIG46296:291-401,470-667(-)		Dynein light chain	311091	826306	609741	737538	612238	982971	1.40147e+06	456302	457009	682643	727714	1.2373e+06	1.05213e+06	425688	453539	643651	>g|tr|g262640.t1	5811.TGME49_062480	3.6e-27	127.5	Sarcocystidae			ko:K10419					ko00000,ko04131,ko04812				Apicomplexa	3YAYM@5794,3YP6K@5796,3YVBP@5809,KOG4115@1,KOG4115@2759	NA|NA|NA	DN
g|tr|g263423.t1	Foraminifera	574	1	GloG15_CONTIG46628:2580-3506(-)		Glutathione reductase. Source PGD	336269	398881	550318	468834	718730	583130	591793	475131	367459	411469	507479	986823	588672	542536	312968	552299	>g|tr|g263423.t1	36331.EPrPI00000017506	1.8e-77	296.2	Pythiales		1.8.1.7	ko:K00383	ko00480,ko04918,map00480,map04918		R00094,R00115	RC00011	ko00000,ko00001,ko01000				Eukaryota	1MDZW@121069,COG1249@1,KOG0405@2759	NA|NA|NA	Q
g|tr|g264122.t1	Foraminifera	985	2	GloG15_CONTIG46936:320-736,810-911(+)			432890	825136	655580	852157	622004	693823	970629	886702	552878	722738	128377	237629	393446	451353	694895	397093
g|tr|g266433.t1	Foraminifera	22	1	GloG15_CONTIG47960:1-3516(-)		dynein light chain binding	55044.5	29726.8	80833.4	37291.8	28387.1	288746	222899	73024.9	100722	65071	123109	238266	146568	67517.2	60716.2	77075.7	>g|tr|g266433.t1	227086.JGI_V11_50235	1.8e-287	995.7	Eukaryota	GO:0000226,GO:0001539,GO:0001578,GO:0003341,GO:0005575,GO:0005623,GO:0005929,GO:0006928,GO:0006996,GO:0007010,GO:0007017,GO:0007018,GO:0008150,GO:0009987,GO:0016043,GO:0022607,GO:0030030,GO:0030031,GO:0031514,GO:0034622,GO:0035082,GO:0036158,GO:0040011,GO:0042995,GO:0043226,GO:0043933,GO:0044085,GO:0044464,GO:0044782,GO:0048870,GO:0051179,GO:0051674,GO:0060271,GO:0060285,GO:0060294,GO:0065003,GO:…		ko:K10408	ko05016,map05016				ko00000,ko00001,ko04812				Eukaryota	COG5245@1,KOG3595@2759	NA|NA|NA	Z
g|tr|g266821.t1	Foraminifera	661	8	GloG15_CONTIG48119:1157-1297,1360-2034(-)	PMM1	phosphomannomutase activity	1.08514e+06	812172	763431	843894	998425	1.07717e+06	1.26165e+06	964718	951980	750447	846620	1.60803e+06	920338	916900	1.04703e+06	972667	>g|tr|g266821.t1	45351.EDO47912	4.2e-75	288.1	Metazoa	GO:0001666,GO:0003674,GO:0003824,GO:0004615,GO:0005575,GO:0005622,GO:0005623,GO:0005634,GO:0005737,GO:0005829,GO:0005975,GO:0005996,GO:0006013,GO:0006139,GO:0006464,GO:0006486,GO:0006487,GO:0006605,GO:0006725,GO:0006807,GO:0006810,GO:0006886,GO:0006950,GO:0008104,GO:0008150,GO:0008152,GO:0009058,GO:0009059,GO:0009100,GO:0009101,GO:0009225,GO:0009226,GO:0009298,GO:0009628,GO:0009987,GO:0010033,GO:…	5.4.2.8	ko:K17497	ko00051,ko00520,ko01100,ko01110,ko01130,map00051,map00520,map01100,map01110,map01130	M00114	R01818	RC00408	ko00000,ko00001,ko00002,ko01000				Metazoa	38BMK@33154,3BB49@33208,COG0561@1,KOG3189@2759	NA|NA|NA	I
g|tr|g266968.t1	Foraminifera	301	6	GloG15_CONTIG48178:2-438,508-994,1060-1476(+)			1.13794e+06	1.19399e+06	804300	1.12036e+06	1.25091e+06	2.09224e+06	2.13515e+06	1.06208e+06	975605	1.2456e+06	780037	492701	1.38133e+06	975584	1.27967e+06	1.36235e+06
g|tr|g268978.t1	Foraminifera	904	1	GloG15_CONTIG49099:1173-1491,1571-1848(+)		NADH dehydrogenase (Ubiquinone) 1 alpha subcomplex subunit 5	2.96793e+06	1.81357e+06	9.37742e+06	4.53877e+06	2.88876e+06	3.96627e+06	4.01313e+06	2.29081e+06	1.67274e+06	1.65983e+06	1.85071e+06	2.88752e+06	2.44734e+06	2.07379e+06	2.23027e+06	2.0853e+06	>g|tr|g268978.t1	3218.PP1S236_34V6.1	6.1e-15	87.8	Streptophyta	GO:0005575,GO:0005622,GO:0005623,GO:0005737,GO:0005739,GO:0005740,GO:0005743,GO:0005746,GO:0005747,GO:0008150,GO:0008152,GO:0009507,GO:0009536,GO:0009853,GO:0009987,GO:0016020,GO:0019866,GO:0030964,GO:0031090,GO:0031966,GO:0031967,GO:0031975,GO:0032991,GO:0043094,GO:0043226,GO:0043227,GO:0043229,GO:0043231,GO:0044237,GO:0044422,GO:0044424,GO:0044425,GO:0044429,GO:0044444,GO:0044446,GO:0044455,GO:…		ko:K03949	ko00190,ko01100,ko04714,ko04723,ko04932,ko05010,ko05012,ko05016,map00190,map01100,map04714,map04723,map04932,map05010,map05012,map05016	M00146			ko00000,ko00001,ko00002	3.D.1.6			Viridiplantae	37TSM@33090,3GCS6@35493,KOG3365@1,KOG3365@2759	NA|NA|NA	C
g|tr|g269862.t1	Foraminifera	487	1	GloG15_CONTIG49489:2346-2354,2419-3438(+)			203533	847600	335833	495365	556387	267551	441762	434810	368356	1.0316e+06	27778.5	92607.7	792275	150961	283812	329554
g|tr|g270476.t1	Foraminifera	58	2	GloG15_CONTIG49762:1039-3450(-)	RNR1	ribonucleoside-diphosphate reductase activity	81719.4	257290	167404	251708	311231	1.15921e+06	1.38504e+06	291345	105338	206555	180127	268907	570950	145793	146256	166993	>g|tr|g270476.t1	227086.JGI_V11_58266	0.0	1129.4	Eukaryota	GO:0000166,GO:0003674,GO:0003824,GO:0004550,GO:0004748,GO:0005488,GO:0005515,GO:0005524,GO:0005575,GO:0005622,GO:0005623,GO:0005634,GO:0005737,GO:0005739,GO:0005829,GO:0005971,GO:0006139,GO:0006165,GO:0006213,GO:0006220,GO:0006221,GO:0006235,GO:0006240,GO:0006725,GO:0006753,GO:0006793,GO:0006796,GO:0006807,GO:0008144,GO:0008150,GO:0008152,GO:0009058,GO:0009116,GO:0009117,GO:0009119,GO:0009132,GO:…	1.17.4.1	ko:K10807	ko00230,ko00240,ko00480,ko00983,ko01100,map00230,map00240,map00480,map00983,map01100	M00053	R02017,R02019,R02024,R08363,R08364,R11893	RC00613,RC01003	ko00000,ko00001,ko00002,ko01000,ko03400				Eukaryota	COG0209@1,KOG1112@2759	NA|NA|NA	F
g|tr|g271587.t1	Foraminifera	150	2	GloG15_CONTIG50263:1686-3435(+)	CCDC22	cullin family protein binding	20344.4	43642.8	30050.4	32113.3	39020.9	31428.3	28534.9	36223.7	18016.1	44659.4	16674.9	44205.1	22375	49543.5	19008.9	35076.3	>g|tr|g271587.t1	45351.EDO47059	2.3e-30	140.6	Metazoa	GO:0003674,GO:0005488,GO:0005515,GO:0005575,GO:0005622,GO:0005623,GO:0005634,GO:0005654,GO:0005737,GO:0005829,GO:0006355,GO:0006464,GO:0006807,GO:0006810,GO:0006873,GO:0006875,GO:0006878,GO:0006892,GO:0006893,GO:0007253,GO:0008104,GO:0008150,GO:0008152,GO:0009889,GO:0009893,GO:0009894,GO:0009896,GO:0009966,GO:0009967,GO:0009968,GO:0009987,GO:0010468,GO:0010556,GO:0010604,GO:0010646,GO:0010647,GO:…											Metazoa	38EGR@33154,3BJ5R@33208,KOG1937@1,KOG1937@2759	NA|NA|NA	S
g|tr|g272551.t1	Foraminifera	722	1	GloG15_CONTIG50705:17-777(-)	OPLAH	5-oxoprolinase (ATP-hydrolyzing) activity	2324.36	13237.5	22732.8	16721.1	1734.33	7982.07	2706.7	5324.26	13406.6	10473.2	21478.2	6721.44	20727.7	17166	813.477	8134.98	>g|tr|g272551.t1	7739.XP_002612422.1	1e-59	236.9	Chordata	GO:0003674,GO:0003824,GO:0005575,GO:0005622,GO:0005623,GO:0005737,GO:0005829,GO:0006518,GO:0006575,GO:0006749,GO:0006750,GO:0006790,GO:0006807,GO:0008150,GO:0008152,GO:0009058,GO:0009987,GO:0016787,GO:0016810,GO:0016812,GO:0017168,GO:0019184,GO:0034641,GO:0042398,GO:0043043,GO:0043603,GO:0043604,GO:0044237,GO:0044249,GO:0044271,GO:0044272,GO:0044424,GO:0044444,GO:0044464,GO:0051186,GO:0051188,GO:…	3.5.2.9	ko:K01469	ko00480,map00480		R00251	RC00553	ko00000,ko00001,ko01000				Metazoa	38C8D@33154,3BHEN@33208,3CYN2@33213,4829K@7711,COG0145@1,KOG1939@2759	NA|NA|NA	E
g|tr|g273111.t1	Foraminifera	752	1	GloG15_CONTIG50963:1718-2080,2158-2526(-)	ADK1	Adenylate kinase. Source PGD	578807	905658	795496	773315	732812	593605	951601	498506	545896	723272	438438	1.40265e+06	1.012e+06	541167	397999	710095	>g|tr|g273111.t1	36331.EPrPI00000023527	8.8e-72	276.9	Pythiales	GO:0000166,GO:0000287,GO:0001889,GO:0002244,GO:0002376,GO:0002520,GO:0002521,GO:0003674,GO:0003824,GO:0004017,GO:0005488,GO:0005507,GO:0005524,GO:0005575,GO:0005622,GO:0005623,GO:0005634,GO:0005737,GO:0005739,GO:0005740,GO:0005743,GO:0005758,GO:0005773,GO:0005774,GO:0005829,GO:0005929,GO:0006091,GO:0006119,GO:0006139,GO:0006144,GO:0006163,GO:0006164,GO:0006166,GO:0006172,GO:0006259,GO:0006260,GO:…	2.7.4.3	ko:K00939	ko00230,ko00730,ko01100,ko01110,ko01130,map00230,map00730,map01100,map01110,map01130	M00049	R00127,R01547,R11319	RC00002	ko00000,ko00001,ko00002,ko01000,ko04147				Eukaryota	1MDYV@121069,COG0563@1,KOG3078@2759	NA|NA|NA	F
g|tr|g273742.t1	Foraminifera	193	1	GloG15_CONTIG51241:215-495,557-936,998-1929(+)		Ankyrin repeats (3 copies)	295016	625788	819900	573086	372288	630334	606667	258012	481078	328757	736883	179839	535481	705235	637499	777127	>g|tr|g273742.t1	159749.K0RWS5	3e-32	146.7	Bacillariophyta												Eukaryota	2DE90@1,2S5PQ@2759,2XEV1@2836	NA|NA|NA	S
g|tr|g274694.t1	Foraminifera	585	3	GloG15_CONTIG51676:1-210,315-1013(-)	PUT2	Delta-1-pyrroline-5-carboxylate dehydrogenase	584934	381601	91609.3	294350	489865	746741	826037	365201	355211	404292	470732	84376.7	438436	326433	624460	570138	>g|tr|g274694.t1	160860.XP_007356202.1	9.5e-100	370.2	Agaricomycetes incertae sedis	GO:0003674,GO:0003824,GO:0003842,GO:0005575,GO:0005622,GO:0005623,GO:0005737,GO:0005739,GO:0005759,GO:0006082,GO:0006520,GO:0006536,GO:0006537,GO:0006560,GO:0006562,GO:0006807,GO:0006950,GO:0007154,GO:0008150,GO:0008152,GO:0008652,GO:0009056,GO:0009058,GO:0009063,GO:0009064,GO:0009065,GO:0009084,GO:0009267,GO:0009605,GO:0009987,GO:0009991,GO:0010133,GO:0016053,GO:0016054,GO:0016491,GO:0016645,GO:…	1.2.1.88	ko:K00294	ko00250,ko00330,ko01100,map00250,map00330,map01100		R00245,R00707,R00708,R04444,R04445,R05051	RC00080,RC00216,RC00242,RC00255	ko00000,ko00001,ko01000				Fungi	225KB@155619,38D6T@33154,3H2FA@355688,3NWNB@4751,3UYAN@5204,COG1012@1,KOG2455@2759	NA|NA|NA	E
g|tr|g275259.t1	Foraminifera	1038	3	GloG15_CONTIG51924:675-1107,1291-1313(-)	RPS13	ribosomal protein	545630	1.34441e+06	1.11307e+06	1.1792e+06	1.66557e+06	889709	1.74026e+06	1.102e+06	581710	1.3242e+06	956089	608591	1.72748e+06	763390	574390	762212	>g|tr|g275259.t1	81985.XP_006284693.1	1.9e-53	215.3	Brassicales	GO:0003674,GO:0003676,GO:0003723,GO:0003735,GO:0005198,GO:0005488,GO:0005575,GO:0005622,GO:0005623,GO:0005634,GO:0005730,GO:0005737,GO:0005829,GO:0005840,GO:0006412,GO:0006518,GO:0006807,GO:0008150,GO:0008152,GO:0009058,GO:0009059,GO:0009987,GO:0010467,GO:0015935,GO:0019538,GO:0019843,GO:0022626,GO:0022627,GO:0031974,GO:0031981,GO:0032991,GO:0034641,GO:0034645,GO:0043043,GO:0043170,GO:0043226,GO:…		ko:K02953	ko03010,map03010	M00177			br01610,ko00000,ko00001,ko00002,ko03011				Viridiplantae	37TYW@33090,3GBY4@35493,3HVMA@3699,COG0184@1,KOG0400@2759	NA|NA|NA	J
g|tr|g276334.t1	Foraminifera	995	2	GloG15_CONTIG52420:2632-2997,3047-3184(-)			178206	331131	242498	296875	253483	305236	376244	212100	273762	285098	96784.9	156459	366863	191933	285380	245902
g|tr|g276498.t1	Foraminifera	126	3	GloG15_CONTIG52492:1176-1639,1713-3159(+)	ODA6	Dynein, 70 kDa intermediate chain, flagellar outer arm	4097.47	3281.24	2931.73	1600.08	5259.14	30644.7	212299	2765.47	5818.85	2443.5	25744.9	65131.6	99618.3	12104	2598.26	2578.17	>g|tr|g276498.t1	38833.XP_003060449.1	3e-124	452.6	Chlorophyta	GO:0000226,GO:0001539,GO:0001578,GO:0003341,GO:0005575,GO:0005623,GO:0005929,GO:0006928,GO:0006996,GO:0007010,GO:0007017,GO:0007018,GO:0008150,GO:0009987,GO:0016043,GO:0022607,GO:0030030,GO:0030031,GO:0031514,GO:0034622,GO:0035082,GO:0036158,GO:0040011,GO:0042995,GO:0043226,GO:0043933,GO:0044085,GO:0044464,GO:0044782,GO:0048870,GO:0051179,GO:0051674,GO:0060271,GO:0060285,GO:0060294,GO:0065003,GO:…		ko:K11143	ko05016,map05016				ko00000,ko00001,ko04812				Viridiplantae	34HCV@3041,37TCG@33090,KOG1587@1,KOG1587@2759	NA|NA|NA	Z
g|tr|g276958.t1	Foraminifera	518	1	GloG15_CONTIG52711:2140-2782,2848-3203(-)	ATG3	Atg8 ligase activity	219767	665727	486945	555068	412972	579579	481793	432745	394449	531698	1.14626e+06	1.50092e+06	784171	828920	345698	670325	>g|tr|g276958.t1	55529.EKX51392	3.9e-62	245.4	Eukaryota	GO:0000045,GO:0000151,GO:0000153,GO:0000272,GO:0000422,GO:0003674,GO:0003824,GO:0005488,GO:0005515,GO:0005575,GO:0005622,GO:0005623,GO:0005737,GO:0005773,GO:0005776,GO:0005829,GO:0005975,GO:0005976,GO:0005977,GO:0005980,GO:0006073,GO:0006091,GO:0006112,GO:0006464,GO:0006497,GO:0006501,GO:0006605,GO:0006612,GO:0006807,GO:0006810,GO:0006886,GO:0006914,GO:0006915,GO:0006950,GO:0006996,GO:0007005,GO:…		ko:K08343	ko04136,ko04138,ko04140,ko05167,map04136,map04138,map04140,map05167				ko00000,ko00001,ko03029,ko04121,ko04131				Eukaryota	KOG2981@1,KOG2981@2759	NA|NA|NA	O
g|tr|g277080.t1	Foraminifera	430	11	GloG15_CONTIG52776:974-1327,1388-2146(+)		fructose-bisphosphate aldolase	3.70026e+06	3.16226e+06	1.96427e+06	2.62403e+06	3.50476e+06	3.19393e+06	3.02228e+06	5.82623e+06	3.84205e+06	3.2444e+06	3.38513e+06	2.93047e+06	3.12105e+06	3.85654e+06	3.55422e+06	5.0174e+06	>g|tr|g277080.t1	264402.Cagra.0154s0033.1.p	3.5e-112	411.8	Brassicales	GO:0003674,GO:0003824,GO:0004332,GO:0005575,GO:0005622,GO:0005623,GO:0005737,GO:0005829,GO:0005975,GO:0005996,GO:0006006,GO:0006082,GO:0006090,GO:0006091,GO:0006094,GO:0006096,GO:0006139,GO:0006163,GO:0006164,GO:0006165,GO:0006725,GO:0006732,GO:0006733,GO:0006753,GO:0006754,GO:0006757,GO:0006793,GO:0006796,GO:0006807,GO:0008150,GO:0008152,GO:0009056,GO:0009058,GO:0009108,GO:0009117,GO:0009123,GO:…	4.1.2.13	ko:K01623	ko00010,ko00030,ko00051,ko00680,ko00710,ko01100,ko01110,ko01120,ko01130,ko01200,ko01230,map00010,map00030,map00051,map00680,map00710,map01100,map01110,map01120,map01130,map01200,map01230	M00001,M00003,M00165,M00167	R01068,R01070,R01829,R02568	RC00438,RC00439,RC00603,RC00604	ko00000,ko00001,ko00002,ko01000,ko03036,ko04131,ko04147				Viridiplantae	37KBJ@33090,3GDDU@35493,3HVBS@3699,COG3588@1,KOG1557@2759	NA|NA|NA	G
g|tr|g277246.t1	Foraminifera	864	1	GloG15_CONTIG52854:1786-2409(-)			12166.2	26922.6	16888.2	24728.4	13798.2	18563.9	27250	13751.2	11116.4	18822.6	26383	3714.3	31380.1	30046.1	0	35642.3
g|tr|g278963.t1	Foraminifera	155	2	GloG15_CONTIG53660:1257-1749,1814-1930,2008-3107(+)		protein serine/threonine kinase activity	103920	184388	304780	270230	129591	76293.2	125000	160779	167835	180758	307005	248777	169728	117331	74358.4	110024	>g|tr|g278963.t1	227086.JGI_V11_87494	1.9e-53	217.2	Eukaryota	GO:0000165,GO:0000187,GO:0001817,GO:0001932,GO:0001934,GO:0002218,GO:0002221,GO:0002224,GO:0002237,GO:0002253,GO:0002376,GO:0002682,GO:0002684,GO:0002757,GO:0002758,GO:0002764,GO:0003674,GO:0003824,GO:0004672,GO:0004674,GO:0004683,GO:0005488,GO:0005515,GO:0005516,GO:0005575,GO:0005622,GO:0005623,GO:0005634,GO:0005654,GO:0005737,GO:0005813,GO:0005815,GO:0005829,GO:0005856,GO:0006082,GO:0006464,GO:…	2.7.11.1	ko:K13412	ko04626,ko05145,map04626,map05145				ko00000,ko00001,ko01000,ko01001				Eukaryota	KOG0032@1,KOG0032@2759	NA|NA|NA	T
g|tr|g279076.t1	Foraminifera	164	12	GloG15_CONTIG53713:669-1546,1632-2430(+)		assists the folding of proteins upon ATP hydrolysis	328861	875476	410206	612032	711069	585707	991348	703474	485547	886810	209510	359802	814165	371978	389250	519515	>g|tr|g279076.t1	3885.XP_007139136.1	4.3e-175	621.3	fabids	GO:0003674,GO:0005488,GO:0005515,GO:0005575,GO:0005622,GO:0005623,GO:0005737,GO:0005829,GO:0005832,GO:0006457,GO:0006458,GO:0008150,GO:0009987,GO:0010035,GO:0010038,GO:0010043,GO:0016020,GO:0032991,GO:0042221,GO:0044183,GO:0044424,GO:0044444,GO:0044445,GO:0044464,GO:0046686,GO:0050896,GO:0051082,GO:0061077,GO:0101031		ko:K09498					ko00000,ko03110,ko04147				Viridiplantae	37J2X@33090,3GDA2@35493,4JDFF@91835,COG0459@1,KOG0359@2759	NA|NA|NA	O
g|tr|g279422.t1	Foraminifera	1002	2	GloG15_CONTIG53877:1289-1339,1413-1516,1575-1626,1717-2007(+)	MA20_20905	Redoxin	334878	280099	214184	389858	386366	407685	157495	511379	288537	452608	288206	775300	280548	477565	425867	367822	>g|tr|g279422.t1	504832.OCAR_7328	7.9e-32	143.7	Bradyrhizobiaceae		1.11.1.15	ko:K03386	ko04214,map04214				ko00000,ko00001,ko01000,ko04147				Bacteria	1MU0H@1224,2U6ZN@28211,3JU03@41294,COG0678@1,COG0678@2	NA|NA|NA	O
g|tr|g280569.t1	Foraminifera	883	1	GloG15_CONTIG54432:511-559,623-919,976-1241(+)		GTPase activity	290038	229396	374503	245477	474530	319469	366688	489560	303525	252270	599375	994264	312470	254526	285650	556336	>g|tr|g280569.t1	227086.JGI_V11_88590	3.7e-31	141.7	Eukaryota			ko:K07911					ko00000,ko04031				Eukaryota	KOG0092@1,KOG0092@2759	NA|NA|NA	S
g|tr|g282616.t1	Foraminifera	824	3	GloG15_CONTIG55380:2500-2828,2893-3220(-)	PSMB1	threonine-type endopeptidase activity	547354	529700	278128	385454	661899	636717	661571	646491	575418	560516	454142	513624	685441	641253	659407	475433	>g|tr|g282616.t1	55529.EKX51358	3.5e-56	224.9	Eukaryota	GO:0000502,GO:0001775,GO:0002252,GO:0002263,GO:0002274,GO:0002275,GO:0002283,GO:0002366,GO:0002376,GO:0002443,GO:0002444,GO:0002446,GO:0003674,GO:0005488,GO:0005515,GO:0005575,GO:0005576,GO:0005622,GO:0005623,GO:0005634,GO:0005654,GO:0005737,GO:0005783,GO:0005789,GO:0005829,GO:0005839,GO:0005886,GO:0006464,GO:0006508,GO:0006511,GO:0006807,GO:0006810,GO:0006887,GO:0006950,GO:0006952,GO:0006955,GO:…	3.4.25.1	ko:K02732	ko03050,map03050	M00337,M00340			ko00000,ko00001,ko00002,ko01000,ko01002,ko03051				Eukaryota	COG0638@1,KOG0179@2759	NA|NA|NA	O
g|tr|g282827.t1	Foraminifera	955	10	GloG15_CONTIG55483:2225-2390,2506-2645,2701-2943(+)		modification-dependent protein catabolic process	1.50784e+06	1.20504e+06	1.01743e+06	1.22757e+06	1.2268e+06	1.54053e+06	1.14134e+06	1.45679e+06	1.15726e+06	1.10928e+06	1.185e+06	833542	1.11855e+06	1.3535e+06	1.46519e+06	1.5778e+06	>g|tr|g282827.t1	227086.JGI_V11_92509	1.8e-53	215.7	Eukaryota			ko:K03094	ko04110,ko04111,ko04114,ko04120,ko04141,ko04310,ko04341,ko04350,ko04710,ko05168,ko05200,map04110,map04111,map04114,map04120,map04141,map04310,map04341,map04350,map04710,map05168,map05200	M00379,M00380,M00381,M00382,M00387,M00407,M00411			ko00000,ko00001,ko00002,ko03036,ko04121				Eukaryota	COG5201@1,KOG1724@2759	NA|NA|NA	O
g|tr|g283379.t1	Foraminifera	38	2	GloG15_CONTIG55734:1-3011(-)		dynein light chain binding	474833	605628	478394	573848	526552	416018	426886	426752	473857	584002	1.37238e+06	2.71391e+06	591442	661618	615441	521769	>g|tr|g283379.t1	227086.JGI_V11_52380	1.3e-92	348.2	Eukaryota	GO:0000003,GO:0000070,GO:0000166,GO:0000235,GO:0000278,GO:0000280,GO:0000741,GO:0000742,GO:0000746,GO:0000747,GO:0000819,GO:0003674,GO:0003774,GO:0003777,GO:0003824,GO:0005488,GO:0005515,GO:0005524,GO:0005575,GO:0005622,GO:0005623,GO:0005737,GO:0005815,GO:0005816,GO:0005818,GO:0005819,GO:0005856,GO:0005868,GO:0005874,GO:0005875,GO:0005876,GO:0005881,GO:0005938,GO:0006810,GO:0006928,GO:0006996,GO:…		ko:K10413	ko04145,ko04962,ko05132,map04145,map04962,map05132				ko00000,ko00001,ko03036,ko04147,ko04812				Eukaryota	COG5245@1,KOG3595@2759	NA|NA|NA	Z
g|tr|g284045.t1	Foraminifera	345	1	GloG15_CONTIG56046:1038-1101,1175-2352(+)		acyl-CoA oxidase activity	417218	751895	357327	545205	551028	671246	562700	585546	728151	637035	1.80367e+06	211815	742445	1.03027e+06	625299	692614	>g|tr|g284045.t1	6087.XP_002166799.2	3.2e-106	392.1	Metazoa		1.3.3.6	ko:K00232	ko00071,ko00592,ko01040,ko01100,ko01110,ko01212,ko03320,ko04024,ko04146,map00071,map00592,map01040,map01100,map01110,map01212,map03320,map04024,map04146	M00087,M00113	R01175,R01279,R03777,R03857,R03990,R04751,R04754,R07888,R07892,R07896,R07934,R07950	RC00052,RC00076	ko00000,ko00001,ko00002,ko01000				Metazoa	39M88@33154,3B9Y8@33208,COG1960@1,KOG0135@2759	NA|NA|NA	IQ
g|tr|g285045.t1	Foraminifera	53	3	GloG15_CONTIG56531:369-2648,2715-2909(-)		The coatomer is a cytosolic protein complex that binds to dilysine motifs and reversibly associates with Golgi non- clathrin-coated vesicles, which further mediate biosynthetic protein transport from the ER, via the Golgi up to the trans Golgi network. Coatomer complex is required for budding from Golgi membranes, and is essential for the retrograde Golgi-to-ER transport of dilysine-tagged protei…	542701	536505	184974	462608	534330	829602	649886	362275	461785	385597	312074	276247	424145	335088	572378	633559	>g|tr|g285045.t1	4113.PGSC0003DMT400073669	7.1e-182	644.4	asterids	GO:0005575,GO:0005622,GO:0005623,GO:0005737,GO:0005794,GO:0005798,GO:0005829,GO:0006810,GO:0006886,GO:0006888,GO:0006890,GO:0006891,GO:0008104,GO:0008150,GO:0012505,GO:0012506,GO:0015031,GO:0015833,GO:0016020,GO:0016192,GO:0030117,GO:0030120,GO:0030126,GO:0030135,GO:0030137,GO:0030659,GO:0030660,GO:0030662,GO:0030663,GO:0031090,GO:0031410,GO:0031982,GO:0032991,GO:0033036,GO:0034613,GO:0042886,GO:…		ko:K17302					ko00000,ko04131,ko04147				Viridiplantae	37HJ2@33090,3GA3V@35493,44PXJ@71274,KOG0276@1,KOG0276@2759	NA|NA|NA	U
g|tr|g286023.t1	Foraminifera	843	2	GloG15_CONTIG56997:892-1446,1517-1606(-)	MAR1	isochorismatase domain-containing protein	22685.2	51002.5	34767.3	38226.9	30497.1	71606.6	104848	78292.4	45348.7	60295	31413.8	15874.8	57084.9	98426.3	30850.2	73395.4	>g|tr|g286023.t1	130081.XP_005708708.1	5.2e-36	157.9	Eukaryota												Eukaryota	COG1335@1,KOG4044@2759	NA|NA|NA	Q
g|tr|g286203.t1	Foraminifera	946	1	GloG15_CONTIG57075:1388-1445,1523-2022(+)		HIT domain	1.63712e+06	903718	206628	517112	849188	1.17801e+06	1.16951e+06	1.42691e+06	1.46089e+06	723326	1.06926e+06	411306	1.04051e+06	1.1818e+06	906189	1.3191e+06	>g|tr|g286203.t1	29176.XP_003882072.1	1.5e-34	152.9	Sarcocystidae	GO:0000118,GO:0003674,GO:0003824,GO:0005080,GO:0005488,GO:0005515,GO:0005575,GO:0005622,GO:0005623,GO:0005634,GO:0005654,GO:0005737,GO:0005829,GO:0005856,GO:0005886,GO:0006139,GO:0006163,GO:0006195,GO:0006355,GO:0006725,GO:0006753,GO:0006793,GO:0006796,GO:0006807,GO:0006915,GO:0007154,GO:0007165,GO:0008150,GO:0008152,GO:0008219,GO:0009056,GO:0009058,GO:0009117,GO:0009150,GO:0009154,GO:0009166,GO:…		ko:K02503					ko00000,ko04147				Apicomplexa	3YANM@5794,3YJ91@5796,3YUSB@5809,COG0537@1,KOG3275@2759	NA|NA|NA	T
g|tr|g287132.t1-g|tr|g465569.t1(71.43%)-g|tr|g245833.t1(75.34%)	Foraminifera	905	7	GloG15_CONTIG171627:1-106,167-229(-)		Ras protein let-60. Source PGD	1.23846e+06	1.58584e+06	1.42789e+06	1.48756e+06	1.20764e+06	1.27738e+06	968515	1.53101e+06	1.67533e+06	1.95536e+06	894969	260274	1.61492e+06	1.42542e+06	1.62125e+06	1.44994e+06	>g|tr|g287132.t1	65071.PYU1_T007663	8.2e-68	263.5	Pythiales			ko:K07208,ko:K07827	ko01521,ko01522,ko04010,ko04012,ko04013,ko04014,ko04015,ko04062,ko04068,ko04071,ko04072,ko04137,ko04138,ko04140,ko04150,ko04151,ko04152,ko04210,ko04211,ko04213,ko04214,ko04218,ko04320,ko04360,ko04370,ko04371,ko04540,ko04550,ko04650,ko04660,ko04662,ko04664,ko04714,ko04720,ko04722,ko04725,ko04726,ko04730,ko04810,ko04910,ko04912,ko04914,ko04915,ko04916,ko04917,ko04919,ko04921,ko04926,ko04933,ko04960…				ko00000,ko00001,ko04031,ko04131				Eukaryota	1MCZK@121069,COG1100@1,KOG0395@2759	NA|NA|NA	S
g|tr|g288978.t1	Foraminifera	1071	3	GloG15_CONTIG58406:530-952(+)		protein transport	302027	364877	247705	302990	264252	272375	309500	384216	442280	345144	374760	463464	317582	402716	288723	439811	>g|tr|g288978.t1	227086.JGI_V11_52783	5.2e-53	213.8	Eukaryota	GO:0005575,GO:0005622,GO:0005623,GO:0005737,GO:0005794,GO:0005802,GO:0012505,GO:0016020,GO:0030117,GO:0030119,GO:0030124,GO:0031984,GO:0032991,GO:0043226,GO:0043227,GO:0043229,GO:0043231,GO:0044422,GO:0044424,GO:0044425,GO:0044431,GO:0044444,GO:0044446,GO:0044464,GO:0048475,GO:0098791,GO:0098796	2.3.1.42,2.7.1.11	ko:K00649,ko:K00850,ko:K12403	ko00010,ko00030,ko00051,ko00052,ko00564,ko00680,ko01100,ko01110,ko01120,ko01130,ko01200,ko01230,ko03018,ko04142,ko04146,ko04152,ko05230,map00010,map00030,map00051,map00052,map00564,map00680,map01100,map01110,map01120,map01130,map01200,map01230,map03018,map04142,map04146,map04152,map05230	M00001,M00345	R00756,R01013,R03236,R03237,R03238,R03239,R04779	RC00002,RC00004,RC00017,RC00041	ko00000,ko00001,ko00002,ko01000,ko01009,ko03019,ko04131				Eukaryota	COG5030@1,KOG0934@2759	NA|NA|NA	U
g|tr|g289516.t1	Foraminifera	512	1	GloG15_CONTIG58674:1829-2222,2368-2517,2587-3047(+)		alanine aminotransferase	610963	543473	682101	543985	542183	609209	643912	478597	619695	606623	610036	1.35363e+06	590209	446956	680471	601236	>g|tr|g289516.t1	3218.PP1S120_131V6.4	1.1e-77	297.0	Streptophyta		2.6.1.2	ko:K00814	ko00220,ko00250,ko00710,ko01100,ko01120,ko01200,ko01210,ko01230,map00220,map00250,map00710,map01100,map01120,map01200,map01210,map01230	M00171	R00258	RC00006,RC00008	ko00000,ko00001,ko00002,ko01000,ko01007				Viridiplantae	37PSU@33090,3GG4I@35493,COG0436@1,KOG0258@2759	NA|NA|NA	E
g|tr|g290432.t1	Foraminifera	36	1	GloG15_CONTIG59138:1-3058(-)	ODA-DHCB	dynein light chain binding	7159.48	13554.7	14423	11.4652	16534.6	534406	264837	3658.96	11710.5	22204	71515.5	21644.5	161221	6782.6	11898.8	10774.2	>g|tr|g290432.t1	227086.JGI_V11_92928	1.3e-307	1062.4	Eukaryota	GO:0005575,GO:0005623,GO:0005929,GO:0031514,GO:0042995,GO:0043226,GO:0044464,GO:0120025		ko:K10408	ko05016,map05016				ko00000,ko00001,ko04812				Eukaryota	COG5245@1,KOG3595@2759	NA|NA|NA	Z
g|tr|g290879.t1	Foraminifera	912	8	GloG15_CONTIG59351:1195-1650,1709-1843(+)	ATP5D	proton-transporting ATP synthase activity, rotational mechanism	541096	626445	506121	624027	595312	807853	855189	564208	480314	577028	241301	336728	696150	321114	591015	555292	>g|tr|g290879.t1	55529.EKX50931	1.1e-19	103.6	Eukaryota	GO:0000275,GO:0003674,GO:0003824,GO:0005215,GO:0005488,GO:0005575,GO:0005622,GO:0005623,GO:0005737,GO:0005739,GO:0005740,GO:0005743,GO:0005753,GO:0005756,GO:0005759,GO:0006091,GO:0006119,GO:0006139,GO:0006163,GO:0006164,GO:0006725,GO:0006753,GO:0006754,GO:0006793,GO:0006796,GO:0006807,GO:0006810,GO:0006811,GO:0006812,GO:0006839,GO:0006996,GO:0007005,GO:0007006,GO:0007007,GO:0008150,GO:0008152,GO:…	3.6.3.14	ko:K02112,ko:K02114,ko:K02134,ko:K14573	ko00190,ko00195,ko01100,ko03008,ko04714,ko05010,ko05012,ko05016,map00190,map00195,map01100,map03008,map04714,map05010,map05012,map05016	M00157,M00158			ko00000,ko00001,ko00002,ko00194,ko01000,ko03009	3.A.2.1		iMM904.YDL004W,iND750.YDL004W	Eukaryota	COG0355@1,KOG1758@2759	NA|NA|NA	C
g|tr|g290984.t1-g|tr|g714031.t1(74.16%)-g|tr|g664489.t1(85.15%)	Foraminifera	482	4	GloG15_CONTIG407058:79-500,562-769(-)	TDH3	glyceraldehyde-3-phosphate dehydrogenase (NAD(P)+) (phosphorylating) activity	2.53185e+06	2.93954e+06	2.00642e+06	2.57742e+06	2.43507e+06	2.20086e+06	1.64651e+06	1.79041e+06	1.89996e+06	1.84314e+06	1.11585e+06	1.23733e+06	2.16639e+06	1.88533e+06	3.22474e+06	2.79572e+06	>g|tr|g290984.t1	130081.XP_005708895.1	7e-115	420.6	Eukaryota	GO:0001932,GO:0001934,GO:0003674,GO:0003676,GO:0003682,GO:0003723,GO:0003824,GO:0004365,GO:0005488,GO:0005575,GO:0005618,GO:0005622,GO:0005623,GO:0005634,GO:0005737,GO:0005739,GO:0005811,GO:0005829,GO:0005886,GO:0005975,GO:0005996,GO:0006006,GO:0006007,GO:0006082,GO:0006090,GO:0006091,GO:0006094,GO:0006096,GO:0006139,GO:0006163,GO:0006164,GO:0006165,GO:0006725,GO:0006732,GO:0006733,GO:0006734,GO:…	1.2.1.12,6.1.1.4	ko:K00134,ko:K01869	ko00010,ko00710,ko00970,ko01100,ko01110,ko01120,ko01130,ko01200,ko01230,ko04066,ko05010,map00010,map00710,map00970,map01100,map01110,map01120,map01130,map01200,map01230,map04066,map05010	M00001,M00002,M00003,M00165,M00166,M00308,M00359,M00360,M00552	R01061,R03657	RC00055,RC00149,RC00523	ko00000,ko00001,ko00002,ko01000,ko01007,ko03016,ko03029,ko04131,ko04147				Eukaryota	COG0057@1,KOG0657@2759	NA|NA|NA	G
g|tr|g291150.t1	Foraminifera	1028	5	GloG15_CONTIG59483:2504-2727,2790-2896,2951-3084(-)		Belongs to the universal ribosomal protein uL11 family	1.11095e+07	8.29285e+06	7.35224e+06	8.35324e+06	9.0801e+06	1.21688e+07	1.04254e+07	8.57754e+06	5.47553e+06	5.37609e+06	4.09146e+06	4.91536e+06	6.42024e+06	7.22738e+06	9.06945e+06	6.52439e+06	>g|tr|g291150.t1	4897.EEB07450	8.6e-49	199.9	Taphrinomycotina	GO:0000027,GO:0002181,GO:0003674,GO:0003676,GO:0003723,GO:0003735,GO:0005198,GO:0005488,GO:0005575,GO:0005622,GO:0005623,GO:0005737,GO:0005829,GO:0005840,GO:0006412,GO:0006518,GO:0006807,GO:0006996,GO:0008150,GO:0008152,GO:0009058,GO:0009059,GO:0009987,GO:0010467,GO:0015934,GO:0016043,GO:0019538,GO:0019843,GO:0022607,GO:0022613,GO:0022618,GO:0022625,GO:0022626,GO:0030684,GO:0030687,GO:0032991,GO:…		ko:K02870	ko03010,map03010	M00177			br01610,ko00000,ko00001,ko00002,ko03011				Fungi	38GQE@33154,3ME06@451866,3NU9E@4751,3QR2P@4890,COG0080@1,KOG0886@2759	NA|NA|NA	J
g|tr|g291933.t1-g|tr|g809588.t1(91.94%)	Foraminifera	522	4	GloG15_CONTIG516470:2-822(+)	PPP2CA	serine threonine-protein phosphatase	520530	966279	693869	822510	785219	995684	1.12555e+06	647833	683057	744205	453203	246541	943220	564966	697658	1.02323e+06	>g|tr|g291933.t1	192875.XP_004342697.1	7.7e-156	556.6	Opisthokonta	GO:0000003,GO:0000075,GO:0000082,GO:0000122,GO:0000159,GO:0000184,GO:0000188,GO:0000226,GO:0000228,GO:0000278,GO:0000775,GO:0000779,GO:0000780,GO:0000793,GO:0000794,GO:0000956,GO:0001558,GO:0001654,GO:0001664,GO:0001678,GO:0001745,GO:0001751,GO:0001752,GO:0001754,GO:0001932,GO:0001933,GO:0001934,GO:0003002,GO:0003006,GO:0003205,GO:0003231,GO:0003674,GO:0003823,GO:0003824,GO:0004721,GO:0004722,GO:…	3.1.3.16	ko:K04382	ko03015,ko04013,ko04071,ko04111,ko04113,ko04114,ko04136,ko04138,ko04140,ko04151,ko04152,ko04261,ko04350,ko04390,ko04391,ko04530,ko04728,ko04730,ko05142,ko05160,ko05165,map03015,map04013,map04071,map04111,map04113,map04114,map04136,map04138,map04140,map04151,map04152,map04261,map04350,map04390,map04391,map04530,map04728,map04730,map05142,map05160,map05165				ko00000,ko00001,ko01000,ko01009,ko03036,ko04147				Opisthokonta	38CQT@33154,COG0639@1,KOG0371@2759	NA|NA|NA	T
g|tr|g292809.t1	Foraminifera	919	1	GloG15_CONTIG60301:1-580(-)		Cold shock protein domain	0	388366	88713.6	325257	205012	35732.4	187026	34126.9	3907.79	307462	152889	33364	275011	55255.6	3050.07	24139.7	>g|tr|g292809.t1	99158.XP_008887672.1	3.6e-20	105.1	Sarcocystidae	GO:0005575,GO:0005622,GO:0005623,GO:0005737,GO:0044424,GO:0044464											Apicomplexa	3YAQR@5794,3YPNT@5796,3YWFZ@5809,COG1278@1,KOG3070@2759	NA|NA|NA	J
g|tr|g293108.t1	Foraminifera	454	2	GloG15_CONTIG60443:1664-2243,2300-2802(+)	GME	UDP-glucuronate decarboxylase activity	1.8665e+06	3.26218e+06	3.49589e+06	3.3838e+06	3.06186e+06	3.02017e+06	4.6329e+06	3.02748e+06	2.31016e+06	3.1385e+06	1.13921e+06	911185	2.52559e+06	2.30815e+06	2.1415e+06	2.6887e+06	>g|tr|g293108.t1	130081.XP_005703429.1	7.2e-123	447.2	Eukaryota	GO:0000166,GO:0003674,GO:0003824,GO:0005488,GO:0005575,GO:0005622,GO:0005623,GO:0005737,GO:0005829,GO:0005975,GO:0005996,GO:0006082,GO:0006732,GO:0006766,GO:0006767,GO:0008150,GO:0008152,GO:0009058,GO:0009108,GO:0009110,GO:0009987,GO:0016051,GO:0016053,GO:0016853,GO:0016854,GO:0016857,GO:0019752,GO:0019852,GO:0019853,GO:0036094,GO:0042364,GO:0043436,GO:0044237,GO:0044238,GO:0044249,GO:0044281,GO:…	5.1.3.18	ko:K10046	ko00053,ko00520,ko01100,ko01110,map00053,map00520,map01100,map01110	M00114	R00889,R07672,R07673	RC00289,RC00403,RC01780	ko00000,ko00001,ko00002,ko01000				Eukaryota	COG0451@1,KOG1429@2759	NA|NA|NA	GM
g|tr|g293853.t1	Foraminifera	88	1	GloG15_CONTIG60807:302-2416(-)		Diacylglycerol kinase catalytic domain	15070.6	14079.4	9597.74	12545.7	18846.5	6478.08	25737.6	6935.44	14765	14891	7627.61	13332.3	16687	7580.14	1478.2	26587	>g|tr|g293853.t1	42345.XP_008806762.1	6.8e-24	119.4	Liliopsida	GO:0000166,GO:0000287,GO:0000325,GO:0001101,GO:0001558,GO:0001727,GO:0001932,GO:0001934,GO:0001959,GO:0003376,GO:0003674,GO:0003676,GO:0003677,GO:0003824,GO:0004888,GO:0004930,GO:0005488,GO:0005515,GO:0005516,GO:0005524,GO:0005543,GO:0005575,GO:0005622,GO:0005623,GO:0005634,GO:0005737,GO:0005773,GO:0005774,GO:0005829,GO:0005886,GO:0006066,GO:0006355,GO:0006457,GO:0006629,GO:0006643,GO:0006665,GO:…	2.7.1.91	ko:K04718	ko00600,ko01100,ko04020,ko04071,ko04072,ko04370,ko04371,ko04666,ko05152,map00600,map01100,map04020,map04071,map04072,map04370,map04371,map04666,map05152	M00100	R01926,R02976	RC00002,RC00017	ko00000,ko00001,ko00002,ko01000				Viridiplantae	37RSD@33090,3G745@35493,3KXR9@4447,COG1597@1,KOG1116@2759	NA|NA|NA	IT
g|tr|g293983.t1-g|tr|g1229674.t1(89.19%)	Foraminifera	488	2	GloG15_CONTIG60877:1306-1373,1447-2407(+)	UBC	ubiquitin	3.91918e+06	4.25082e+06	4.42778e+06	3.96811e+06	4.67953e+06	4.22885e+06	3.47596e+06	4.52025e+06	2.68589e+06	2.96946e+06	3.69173e+06	4.79068e+06	4.29972e+06	4.29163e+06	4.3949e+06	3.97992e+06	>g|tr|g293983.t1	6183.Smp_046690.1	2e-53	216.5	Bilateria	GO:0000122,GO:0000165,GO:0000187,GO:0000209,GO:0000715,GO:0000731,GO:0001666,GO:0001932,GO:0001934,GO:0002020,GO:0002218,GO:0002221,GO:0002224,GO:0002253,GO:0002376,GO:0002682,GO:0002684,GO:0002753,GO:0002755,GO:0002756,GO:0002757,GO:0002758,GO:0002764,GO:0003674,GO:0005488,GO:0005515,GO:0005575,GO:0005622,GO:0005623,GO:0005634,GO:0005654,GO:0005737,GO:0005739,GO:0005740,GO:0005741,GO:0005768,GO:…		ko:K08770	ko03320,map03320				ko00000,ko00001,ko04121				Metazoa	38ECC@33154,3B9NC@33208,3CXIG@33213,COG5272@1,KOG0001@2759	NA|NA|NA	O
g|tr|g294281.t1	Foraminifera	100	29	GloG15_CONTIG61027:794-1025,1110-1727,1783-2054,2144-3046(+)	VCP	ATP binding	238440	915937	656985	759169	892454	430031	1.21003e+06	361624	655093	1.31327e+06	770744	656480	1.58567e+06	317739	363251	319918	>g|tr|g294281.t1	227086.JGI_V11_92542	5.6e-270	936.8	Eukaryota	GO:0000003,GO:0000070,GO:0000151,GO:0000153,GO:0000166,GO:0000226,GO:0000228,GO:0000278,GO:0000280,GO:0000323,GO:0000502,GO:0000731,GO:0000785,GO:0000790,GO:0000819,GO:0000835,GO:0000836,GO:0000837,GO:0000839,GO:0000902,GO:0000904,GO:0001775,GO:0002020,GO:0002082,GO:0002165,GO:0002252,GO:0002263,GO:0002274,GO:0002275,GO:0002283,GO:0002366,GO:0002376,GO:0002443,GO:0002444,GO:0002446,GO:0003006,GO:…		ko:K13525	ko04141,ko05134,map04141,map05134	M00400,M00403			ko00000,ko00001,ko00002,ko03019,ko04131,ko04147	3.A.16.1			Eukaryota	COG0464@1,KOG0730@2759	NA|NA|NA	O
g|tr|g294445.t1	Foraminifera	222	2	GloG15_CONTIG61119:1459-2982(+)			531175	530855	8.20451e+06	3.65724e+06	580581	986545	1.06786e+06	248557	431075	507252	357229	368322	601893	350640	644184	426986
g|tr|g294594.t1	Foraminifera	1012	1	GloG15_CONTIG61190:2476-2967(-)	TCRP	4-hydroxyphenylpyruvate dioxygenase	1.1859e+06	1.58332e+06	1.34546e+06	1.18583e+06	1.74171e+06	1.59094e+06	2.13118e+06	1.63403e+06	1.88923e+06	1.92791e+06	1.57327e+06	437474	1.81001e+06	2.24399e+06	1.47611e+06	1.57347e+06	>g|tr|g294594.t1	109871.XP_006675867.1	2.1e-53	215.3	Fungi	GO:0003674,GO:0003824,GO:0003868,GO:0006082,GO:0006520,GO:0006570,GO:0006572,GO:0006582,GO:0006725,GO:0006807,GO:0008150,GO:0008152,GO:0009056,GO:0009058,GO:0009063,GO:0009072,GO:0009074,GO:0009987,GO:0016054,GO:0016491,GO:0016701,GO:0016702,GO:0018958,GO:0019438,GO:0019439,GO:0019748,GO:0019752,GO:0042438,GO:0042440,GO:0043436,GO:0044237,GO:0044238,GO:0044248,GO:0044249,GO:0044281,GO:0044282,GO:…	1.13.11.27	ko:K00457	ko00130,ko00350,ko00360,ko01100,map00130,map00350,map00360,map01100	M00044	R01372,R02521	RC00505,RC00738	ko00000,ko00001,ko00002,ko01000,ko04147				Fungi	38BA4@33154,3NWM8@4751,COG3185@1,KOG0638@2759	NA|NA|NA	E
g|tr|g294707.t1	Foraminifera	414	4	GloG15_CONTIG61249:1242-1517,1582-2000,2064-2505(-)		oxidoreductase activity	754633	743137	491042	801429	722027	823119	835396	757542	524968	953132	554719	468324	820716	704349	920950	824814	>g|tr|g294707.t1	227086.JGI_V11_90596	3.5e-120	438.3	Eukaryota		1.1.1.2	ko:K00002	ko00010,ko00040,ko00561,ko00930,ko01100,ko01110,ko01120,ko01130,ko01220,map00010,map00040,map00561,map00930,map01100,map01110,map01120,map01130,map01220	M00014	R00746,R01041,R01481,R05231	RC00087,RC00088,RC00099,RC00108	ko00000,ko00001,ko00002,ko01000,ko04147				Eukaryota	COG0656@1,KOG1577@2759	NA|NA|NA	J
g|tr|g295215.t1	Foraminifera	1034	3	GloG15_CONTIG61501:1486-1588,1852-2040,2154-2320(-)	RpS18	Belongs to the universal ribosomal protein uS13 family	842596	972637	1.53878e+06	1.2949e+06	1.29017e+06	935739	1.07636e+06	636360	593330	1.54804e+06	641083	1.49787e+06	1.69306e+06	528033	742532	720314	>g|tr|g295215.t1	6211.A0A068YIH4	1.4e-46	192.6	Bilateria	GO:0002181,GO:0003674,GO:0003735,GO:0005198,GO:0005575,GO:0005622,GO:0005623,GO:0005634,GO:0005730,GO:0005737,GO:0005829,GO:0005840,GO:0006412,GO:0006518,GO:0006807,GO:0008150,GO:0008152,GO:0009058,GO:0009059,GO:0009987,GO:0010467,GO:0015935,GO:0019538,GO:0022613,GO:0022626,GO:0022627,GO:0031974,GO:0031981,GO:0032991,GO:0034641,GO:0034645,GO:0042254,GO:0043043,GO:0043170,GO:0043226,GO:0043227,GO:…		ko:K02964	ko03010,map03010	M00177			br01610,ko00000,ko00001,ko00002,ko03011				Metazoa	39ZZ4@33154,3BBA9@33208,3CYJW@33213,COG0099@1,KOG3311@2759	NA|NA|NA	J
g|tr|g295232.t1	Foraminifera	455	1	GloG15_CONTIG61510:1503-2585(+)		26S proteasome non-ATPase regulatory subunit 2	223258	570860	301974	536948	601733	682955	910004	432355	457889	611056	275829	128022	897581	437686	288305	393005	>g|tr|g295232.t1	4641.GSMUA_Achr11P23150_001	1.1e-73	283.9	Liliopsida	GO:0000502,GO:0001101,GO:0002376,GO:0003674,GO:0005488,GO:0005515,GO:0005575,GO:0005622,GO:0005623,GO:0005634,GO:0005737,GO:0005829,GO:0005838,GO:0005886,GO:0005911,GO:0006508,GO:0006511,GO:0006807,GO:0006950,GO:0006952,GO:0006955,GO:0008150,GO:0008152,GO:0008540,GO:0009056,GO:0009057,GO:0009506,GO:0009719,GO:0009725,GO:0009751,GO:0009987,GO:0010033,GO:0010498,GO:0014070,GO:0016020,GO:0019538,GO:…		ko:K03028	ko03050,ko05169,map03050,map05169	M00341			ko00000,ko00001,ko00002,ko03051				Viridiplantae	37NFN@33090,3G94X@35493,3KV6I@4447,COG5110@1,KOG2005@2759	NA|NA|NA	O
g|tr|g295369.t1	Foraminifera	581	1	GloG15_CONTIG61577:1770-2132,2210-2767(+)			180758	177549	77058.9	139471	205297	397957	210249	115376	66384.3	99832.4	61354.1	188739	88788.8	137146	124346	194825
g|tr|g295440.t1	Foraminifera	709	1	GloG15_CONTIG61609:2275-3046(+)		Belongs to the class-I aminoacyl-tRNA synthetase family	60496	323535	523537	388305	234835	121805	164979	261094	162371	294864	224212	160640	193225	371197	73165.3	196102	>g|tr|g295440.t1	5808.XP_002142308.1	1.1e-77	296.6	Coccidia		6.1.1.1	ko:K01866	ko00970,map00970	M00359,M00360	R02918	RC00055,RC00523	ko00000,ko00001,ko00002,ko01000,ko01007,ko03016,ko03029				Apicomplexa	3Y9T7@5794,3YJV0@5796,COG0162@1,KOG2144@2759	NA|NA|NA	J
g|tr|g295560.t1	Foraminifera	212	6	GloG15_CONTIG61670:325-1863(-)		Cop9 signalosome	240197	500119	428077	501457	591539	392480	419885	314574	298737	1.06926e+06	379920	532690	899959	303010	276010	315293	>g|tr|g295560.t1	109760.SPPG_02028T0	1.4e-66	260.8	Fungi	GO:0000003,GO:0000338,GO:0000909,GO:0003006,GO:0005575,GO:0005622,GO:0005623,GO:0005634,GO:0005737,GO:0006355,GO:0006464,GO:0006508,GO:0006807,GO:0006950,GO:0006974,GO:0007275,GO:0008150,GO:0008152,GO:0008180,GO:0009889,GO:0009987,GO:0010468,GO:0010556,GO:0019219,GO:0019222,GO:0019538,GO:0019953,GO:0022414,GO:0030582,GO:0030584,GO:0031323,GO:0031326,GO:0031935,GO:0032501,GO:0032502,GO:0032991,GO:…		ko:K12175					ko00000,ko04121				Fungi	38G4K@33154,3NYRU@4751,KOG0686@1,KOG0686@2759	NA|NA|NA	OT
g|tr|g296547.t1	Foraminifera	45	5	GloG15_CONTIG62163:252-2085,2142-3004(-)	CAND1	Cullin-associated NEDD8-dissociated protein 1	621580	474508	623509	534155	538465	508643	560197	713730	522012	483940	480402	933653	603110	596064	618644	522498	>g|tr|g296547.t1	4513.MLOC_67779.1	6.7e-93	349.0	Poales	GO:0000003,GO:0003002,GO:0003006,GO:0005575,GO:0005618,GO:0005622,GO:0005623,GO:0005634,GO:0005737,GO:0005829,GO:0005886,GO:0006464,GO:0006807,GO:0007275,GO:0007389,GO:0008150,GO:0008152,GO:0009719,GO:0009725,GO:0009733,GO:0009791,GO:0009987,GO:0010033,GO:0010051,GO:0010228,GO:0010265,GO:0016020,GO:0016043,GO:0016567,GO:0019538,GO:0022414,GO:0022607,GO:0030312,GO:0032446,GO:0032501,GO:0032502,GO:…		ko:K17263					ko00000,ko04147				Viridiplantae	37N98@33090,3GA7M@35493,3IA60@38820,3KMG1@4447,KOG1824@1,KOG1824@2759	NA|NA|NA	E
g|tr|g297512.t1	Foraminifera	870	6	GloG15_CONTIG62652:2338-2804,2863-3014(+)	GNB2L1	positive regulation of Golgi to plasma membrane protein transport	520338	1.74699e+06	1.97135e+06	1.64949e+06	1.74935e+06	1.00651e+06	2.15491e+06	745319	738641	1.65409e+06	2.55098e+06	5.86005e+06	2.37372e+06	704001	652274	599277	>g|tr|g297512.t1	400682.PAC_15728334	4e-33	148.3	Metazoa	GO:0000003,GO:0000278,GO:0000280,GO:0000281,GO:0000375,GO:0000377,GO:0000398,GO:0000775,GO:0000776,GO:0000902,GO:0000904,GO:0000910,GO:0001525,GO:0001558,GO:0001568,GO:0001678,GO:0001891,GO:0001932,GO:0001933,GO:0001934,GO:0001944,GO:0001959,GO:0002009,GO:0003006,GO:0003254,GO:0003674,GO:0004857,GO:0004860,GO:0005080,GO:0005102,GO:0005198,GO:0005488,GO:0005515,GO:0005575,GO:0005622,GO:0005623,GO:…		ko:K14753	ko05162,map05162				ko00000,ko00001,ko03019,ko04147				Metazoa	38BFC@33154,3BE2C@33208,KOG0279@1,KOG0279@2759	NA|NA|NA	T
g|tr|g297818.t1	Foraminifera	47	3	GloG15_CONTIG62796:309-2312,2378-2962(-)			286257	348973	559891	368871	285771	311238	231221	429095	193755	410531	329217	236274	285259	339799	295612	319937
g|tr|g299323.t1	Foraminifera	476	12	GloG15_CONTIG63564:1-658,723-1105(-)	TCP1	translocation of peptides or proteins into other organism involved in symbiotic interaction	770449	626052	559830	595481	657346	784395	964159	721414	698794	636359	383405	355785	677808	582309	692284	661663	>g|tr|g299323.t1	55529.EKX50413	1.8e-107	396.0	Eukaryota	GO:0000003,GO:0000166,GO:0000228,GO:0000242,GO:0000785,GO:0000790,GO:0000792,GO:0001669,GO:0002064,GO:0002065,GO:0002066,GO:0002199,GO:0003006,GO:0003674,GO:0005488,GO:0005515,GO:0005524,GO:0005575,GO:0005622,GO:0005623,GO:0005634,GO:0005694,GO:0005720,GO:0005737,GO:0005794,GO:0005813,GO:0005815,GO:0005829,GO:0005832,GO:0005856,GO:0005874,GO:0005886,GO:0006403,GO:0006457,GO:0006458,GO:0006810,GO:…		ko:K09493					ko00000,ko03036,ko03110,ko04147				Eukaryota	COG0459@1,KOG0360@2759	NA|NA|NA	O
g|tr|g299562.t1	Foraminifera	511	1	GloG15_CONTIG63699:449-1019,1082-1256,1333-1594(-)	SUI2	translation initiation factor activity	368471	163402	444448	250551	247053	299398	341695	194448	388355	160059	251096	1.22314e+06	262146	166037	196003	221327	>g|tr|g299562.t1	109760.SPPG_00622T0	3e-62	245.7	Fungi	GO:0000075,GO:0000077,GO:0000278,GO:0001731,GO:0002181,GO:0002183,GO:0003674,GO:0003676,GO:0003723,GO:0003743,GO:0005488,GO:0005575,GO:0005622,GO:0005623,GO:0005737,GO:0005840,GO:0005850,GO:0005851,GO:0006412,GO:0006413,GO:0006518,GO:0006807,GO:0006950,GO:0006974,GO:0007049,GO:0007093,GO:0007346,GO:0008135,GO:0008150,GO:0008152,GO:0009058,GO:0009059,GO:0009987,GO:0010467,GO:0010494,GO:0010564,GO:…		ko:K03237	ko03013,ko04138,ko04140,ko04141,ko04210,ko04932,ko05160,ko05162,ko05164,ko05168,map03013,map04138,map04140,map04141,map04210,map04932,map05160,map05162,map05164,map05168				ko00000,ko00001,ko03012				Fungi	38BMX@33154,3NX0S@4751,COG1093@1,KOG2916@2759	NA|NA|NA	J
g|tr|g300381.t1	Foraminifera	420	4	GloG15_CONTIG64119:1-337,470-1092,1168-1337(-)			668281	677336	375173	583366	642574	966611	990004	704387	753852	588756	493510	172275	838877	824668	775886	811002
g|tr|g300601.t1	Foraminifera	281	1	GloG15_CONTIG64230:1395-2327,2437-2561,2627-2951(-)	NPLOC4	NPL4 family, putative zinc binding region	63237.3	356159	342766	297834	372522	206600	508468	231877	162675	305639	235166	241614	419891	217701	163313	283583	>g|tr|g300601.t1	5932.XP_004027364.1	8.6e-28	131.7	Ciliophora	GO:0000151,GO:0000153,GO:0000226,GO:0000278,GO:0000731,GO:0000835,GO:0000836,GO:0000837,GO:0000839,GO:0001817,GO:0001818,GO:0002682,GO:0002683,GO:0002697,GO:0002698,GO:0002831,GO:0002832,GO:0003674,GO:0005488,GO:0005515,GO:0005575,GO:0005622,GO:0005623,GO:0005634,GO:0005654,GO:0005737,GO:0005739,GO:0005740,GO:0005741,GO:0005783,GO:0005789,GO:0005829,GO:0006139,GO:0006259,GO:0006281,GO:0006301,GO:…	3.6.4.13	ko:K13025,ko:K14015	ko03013,ko03015,ko03040,ko04141,map03013,map03015,map03040,map04141	M00400,M00403,M00430			ko00000,ko00001,ko00002,ko01000,ko03009,ko03012,ko03019,ko03041				Eukaryota	3ZBBI@5878,COG5100@1,KOG2834@2759	NA|NA|NA	UY
g|tr|g300848.t1	Foraminifera	595	4	GloG15_CONTIG64355:2020-2928(-)	PABPC4	negative regulation of nuclear-transcribed mRNA catabolic process, nonsense-mediated decay	439661	660709	974762	771324	718430	607753	649629	542613	468583	1.77094e+06	213354	55925.7	924517	238416	495519	355561	>g|tr|g300848.t1	27923.ML02003a-PA	4.5e-17	95.5	Metazoa	GO:0000184,GO:0000375,GO:0000377,GO:0000398,GO:0000956,GO:0003674,GO:0003676,GO:0003723,GO:0003727,GO:0003729,GO:0003730,GO:0005488,GO:0005515,GO:0005575,GO:0005622,GO:0005623,GO:0005634,GO:0005681,GO:0005737,GO:0005829,GO:0006139,GO:0006378,GO:0006396,GO:0006397,GO:0006401,GO:0006402,GO:0006412,GO:0006413,GO:0006417,GO:0006518,GO:0006725,GO:0006807,GO:0006950,GO:0007596,GO:0007599,GO:0008022,GO:…		ko:K13126	ko03013,ko03015,ko03018,map03013,map03015,map03018				ko00000,ko00001,ko03019,ko03041				Metazoa	38F9F@33154,3BB3Q@33208,KOG0123@1,KOG0123@2759	NA|NA|NA	AJ
g|tr|g301143.t1	Foraminifera	65	1	GloG15_CONTIG64506:144-1102,1172-1511,1567-2108,2178-2646(-)			503493	349287	414007	318067	275677	271072	302512	469001	427254	333315	616952	597634	256914	480478	416397	294678	>g|tr|g301143.t1	946362.XP_004988641.1	2.2e-124	453.4	Opisthokonta												Opisthokonta	2CMQK@1,2QRFD@2759,39S3T@33154	NA|NA|NA
g|tr|g301225.t1	Foraminifera	417	1	GloG15_CONTIG64555:368-1501(-)		Regulator of chromosome condensation (RCC1). Source PGD	112395	161432	113083	134823	136029	203618	119041	129711	161674	145637	59897.2	46704	148733	131819	152197	94669.1	>g|tr|g301225.t1	65071.PYU1_T007692	7.8e-43	181.4	Pythiales		3.6.4.13	ko:K11493,ko:K12811	ko03040,map03040				ko00000,ko00001,ko01000,ko03019,ko03036,ko03041				Eukaryota	1MAQK@121069,COG5184@1,KOG1426@2759	NA|NA|NA	DZ
g|tr|g301942.t1	Foraminifera	386	1	GloG15_CONTIG64924:1080-2264(-)			26889.2	0	0	0	0	0	0	0	8568.67	0	69588.2	0	6582.05	0	0	6262.43
g|tr|g301992.t1	Foraminifera	749	2	GloG15_CONTIG64951:1-307,363-558,622-852(-)		xylan 1,4-beta-xylosidase activity	461975	218031	722951	285314	305004	448873	342140	861047	510255	449258	432050	650306	406310	445123	400784	441389	>g|tr|g301992.t1	227086.JGI_V11_35876	7.7e-68	263.8	Eukaryota		3.2.1.37	ko:K15920	ko00520,ko01100,map00520,map01100		R01433	RC00467	ko00000,ko00001,ko01000		GH3		Eukaryota	2QQ55@2759,COG1472@1	NA|NA|NA	G
g|tr|g302317.t1	Foraminifera	489	1	GloG15_CONTIG65107:323-510,604-982,1052-1513(-)		ubiE/COQ5 methyltransferase family	35401	98468.7	18630.1	48609.2	42922.5	152997	92521.5	31757.1	45483.8	38481.4	3122.97	0	46192.3	7641.74	55751.5	113760	>g|tr|g302317.t1	242159.ABP00263	1e-126	459.9	Chlorophyta		2.1.1.137	ko:K07755					ko00000,ko01000				Viridiplantae	2CMHQ@1,2QQD6@2759,34H4R@3041,37SRD@33090	NA|NA|NA	S
g|tr|g303417.t1-tr|343485947|dbj|BAK61732.1|(71.48%)	Both	67	54	heat shock protein 90kDa, partial [Larcopyle butschlii]		Heat shock protein	1.99004e+06	1.82919e+06	1.78099e+06	1.73984e+06	2.30918e+06	2.56751e+06	2.40631e+06	2.93936e+06	2.92206e+06	2.18295e+06	2.31633e+06	2.36833e+06	2.69923e+06	2.69894e+06	3.04502e+06	3.18725e+06	>g|tr|g303417.t1	4577.GRMZM2G112165_P01	5.7e-250	870.5	Poales			ko:K04079	ko04141,ko04151,ko04217,ko04612,ko04621,ko04626,ko04657,ko04659,ko04914,ko04915,ko05200,ko05215,ko05418,map04141,map04151,map04217,map04612,map04621,map04626,map04657,map04659,map04914,map04915,map05200,map05215,map05418				ko00000,ko00001,ko01009,ko03029,ko03051,ko03110,ko04131,ko04147				Viridiplantae	37QS8@33090,3GC1U@35493,3I40T@38820,3KT69@4447,COG0326@1,KOG0019@2759	NA|NA|NA	O
g|tr|g303509.t1-g|tr|g294200.t1(70.21%)	Foraminifera	753	7	GloG15_CONTIG65714:1261-1992(+)		protein serine/threonine kinase activity	1.07688e+06	1.66192e+06	934310	1.45719e+06	1.68131e+06	1.18553e+06	1.83404e+06	1.92928e+06	1.49772e+06	1.93775e+06	1.39673e+06	2.87302e+06	1.9243e+06	1.62211e+06	1.18421e+06	1.43947e+06	>g|tr|g303509.t1	227086.JGI_V11_45218	4e-40	171.8	Eukaryota		2.7.11.1,2.7.11.11	ko:K07198,ko:K08796,ko:K12761	ko04068,ko04113,ko04138,ko04140,ko04150,ko04151,ko04152,ko04211,ko04213,ko04371,ko04530,ko04710,ko04714,ko04910,ko04920,ko04921,ko04922,ko04931,ko04932,ko05410,ko05418,map04068,map04113,map04138,map04140,map04150,map04151,map04152,map04211,map04213,map04371,map04530,map04710,map04714,map04910,map04920,map04921,map04922,map04931,map04932,map05410,map05418				ko00000,ko00001,ko01000,ko01001,ko03029,ko03036,ko04131				Eukaryota	KOG0583@1,KOG0583@2759	NA|NA|NA	G
g|tr|g303510.t1	Foraminifera	1082	4	GloG15_CONTIG65714:2234-2644(+)			431798	826772	475511	520619	1.19378e+06	650614	733297	949476	665052	844947	602430	590540	711711	756647	545724	901077
g|tr|g304235.t1	Foraminifera	1020	3	GloG15_CONTIG66092:2273-2752(-)	MET3	ATP-sulfurylase	219013	477175	567726	446519	464092	277702	433352	318605	326050	366393	492339	572855	603193	284912	131636	281733	>g|tr|g304235.t1	5786.XP_003289104.1	3.9e-44	184.5	Amoebozoa	GO:0000096,GO:0000103,GO:0003674,GO:0003824,GO:0004779,GO:0004781,GO:0005575,GO:0005622,GO:0005623,GO:0005737,GO:0005739,GO:0006082,GO:0006520,GO:0006790,GO:0006807,GO:0008150,GO:0008152,GO:0009987,GO:0010134,GO:0016740,GO:0016772,GO:0016779,GO:0019379,GO:0019419,GO:0019752,GO:0043226,GO:0043227,GO:0043229,GO:0043231,GO:0043436,GO:0044237,GO:0044238,GO:0044281,GO:0044424,GO:0044444,GO:0044464,GO:…	2.7.7.4	ko:K00958	ko00230,ko00261,ko00450,ko00920,ko01100,ko01120,ko01130,map00230,map00261,map00450,map00920,map01100,map01120,map01130	M00176,M00596	R00529,R04929	RC02809,RC02889	ko00000,ko00001,ko00002,ko01000			iRC1080.CRv4_Au5_s3_g11218_t1	Eukaryota	3X8F7@554915,COG2046@1,KOG0636@2759	NA|NA|NA	H
g|tr|g304287.t1	Foraminifera	1104	3	GloG15_CONTIG66119:1718-2074(+)	ATP6V1F	ATP synthase (F/14-kDa) subunit	311388	477446	803686	609421	479449	517449	411216	719184	560543	599767	419161	128276	505308	680169	572324	691097	>g|tr|g304287.t1	272952.HpaP807883	2.8e-31	141.4	Peronosporales	GO:0000041,GO:0000221,GO:0000322,GO:0000323,GO:0000324,GO:0000329,GO:0000331,GO:0003674,GO:0003824,GO:0005215,GO:0005575,GO:0005622,GO:0005623,GO:0005737,GO:0005773,GO:0005774,GO:0005794,GO:0005829,GO:0005886,GO:0006810,GO:0006811,GO:0006812,GO:0006826,GO:0006873,GO:0006885,GO:0007035,GO:0007154,GO:0007165,GO:0007166,GO:0007167,GO:0007169,GO:0008104,GO:0008150,GO:0008286,GO:0008324,GO:0009719,GO:…		ko:K02151	ko00190,ko01100,ko04145,ko04150,ko04721,ko04966,ko05110,ko05120,ko05323,map00190,map01100,map04145,map04150,map04721,map04966,map05110,map05120,map05323	M00160			ko00000,ko00001,ko00002	3.A.2.2		iMM904.YGR020C,iND750.YGR020C	Eukaryota	3QG18@4776,COG1436@1,KOG3432@2759	NA|NA|NA	C
g|tr|g305962.t1-g|tr|g529145.t1(78.29%)	Foraminifera	98	6	GloG15_CONTIG224236:160-1263,1325-1383(+)		Belongs to the TRAFAC class myosin-kinesin ATPase superfamily. Kinesin family	147477	199707	169400	161589	216805	126741	180300	259597	228385	298736	265864	313420	284628	215891	143528	326999	>g|tr|g305962.t1	5911.EAR95613	2.1e-22	114.4	Ciliophora	GO:0000301,GO:0003674,GO:0003774,GO:0003777,GO:0003824,GO:0005488,GO:0005515,GO:0005575,GO:0005622,GO:0005623,GO:0005737,GO:0005856,GO:0005871,GO:0005874,GO:0005875,GO:0005881,GO:0006810,GO:0006886,GO:0006887,GO:0006891,GO:0006928,GO:0007017,GO:0007018,GO:0007163,GO:0008017,GO:0008092,GO:0008104,GO:0008150,GO:0008360,GO:0008574,GO:0009987,GO:0010970,GO:0015031,GO:0015630,GO:0015631,GO:0015833,GO:…		ko:K10396	ko04144,ko04728,map04144,map04728				ko00000,ko00001,ko04131,ko04147,ko04812				Eukaryota	3ZCV9@5878,COG5059@1,KOG0240@2759	NA|NA|NA	Z
g|tr|g306231.t1	Foraminifera	348	1	GloG15_CONTIG67119:1301-2539(+)	katG	catalase activity	1.18969e+06	598041	1.10544e+06	678096	517193	489946	141852	1.1034e+06	1.50483e+06	1.26394e+06	755357	719620	547409	643057	1.73137e+06	540092	>g|tr|g306231.t1	2880.D7G523	2.7e-97	362.5	Eukaryota	GO:0000003,GO:0000302,GO:0003674,GO:0003824,GO:0004096,GO:0004601,GO:0005488,GO:0005575,GO:0005576,GO:0005622,GO:0005623,GO:0005737,GO:0005829,GO:0006950,GO:0006979,GO:0007154,GO:0008150,GO:0008152,GO:0009056,GO:0009266,GO:0009267,GO:0009408,GO:0009605,GO:0009628,GO:0009636,GO:0009987,GO:0009991,GO:0010035,GO:0016209,GO:0016491,GO:0016684,GO:0016999,GO:0017001,GO:0017144,GO:0019953,GO:0020037,GO:…	1.11.1.21	ko:K03782	ko00360,ko00380,ko00940,ko00983,ko01100,ko01110,map00360,map00380,map00940,map00983,map01100,map01110		R00602,R00698,R02596,R02670,R03919,R04007,R07443,R11906	RC00034,RC00213,RC00767,RC02141	ko00000,ko00001,ko01000				Eukaryota	2QTDY@2759,COG0685@1	NA|NA|NA	E
g|tr|g306948.t1-tr|B5Y3W7|B5Y3W7_PHATC(74.94%)-tr|134142319|gb|ABO61503.1|(75.39%)-tr|134142313|gb|ABO61500.1|(76.17%)-tr|134142303|gb|ABO61495.1|(84.97%)-tr|529159582|gb|AGS56674.1|(86.40%)-tr|14211730|gb|AAK57492.1|AF374487_1(86.91%)-tr|14211722|gb|AAK57488.1|AF374483_1(86.91%)-tr|37935552|gb|AAP46145.1|(87.07%)-tr|529159357|gb|AGS56573.1|(88.00%)-g|tr|g610220.t1(91.90%)-tr|343485949|dbj|BAK617…	Both	295	50	Predicted protein OS=Phaeodactylum tricornutum (strain CCAP 1055/1) GN=PHATR_21122 PE=3 SV=1		Tubulin is the major constituent of microtubules. It binds two moles of GTP, one at an exchangeable site on the beta chain and one at a non-exchangeable site on the alpha chain	1.61035e+07	1.56922e+07	1.10884e+07	1.38267e+07	2.64711e+07	4.29227e+07	5.00153e+07	2.72436e+07	1.29003e+07	1.61825e+07	6.38955e+06	1.2262e+07	3.60466e+07	1.23923e+07	2.53975e+07	2.02524e+07	>g|tr|g306948.t1	29176.XP_003880868.1	9.1e-240	835.9	Sarcocystidae	GO:0005575,GO:0005622,GO:0005623,GO:0005856,GO:0043226,GO:0043228,GO:0043229,GO:0043232,GO:0044424,GO:0044464		ko:K07375	ko04145,ko04540,ko05130,map04145,map04540,map05130				ko00000,ko00001,ko03036,ko04147,ko04812				Apicomplexa	3Y9MJ@5794,3YK2Y@5796,3YT2G@5809,COG5023@1,KOG1375@2759	NA|NA|NA	Z
g|tr|g307559.t1	Foraminifera	130	1	GloG15_CONTIG67824:850-1716,1869-2874(+)		cellulose 1,4-beta-cellobiosidase activity	8021.65	5807.77	8901.43	11085.5	6992.34	6606.75	4964.25	1531.27	1242.63	3282.48	15910.8	1921.06	1817.97	4831.19	29823.1	2335.52	>g|tr|g307559.t1	1136138.JH604622_gene2360	5.1e-39	169.5	Gammaproteobacteria												Bacteria	1R9NJ@1224,1S1DM@1236,COG5301@1,COG5301@2	NA|NA|NA	G
g|tr|g310229.t1	Foraminifera	392	3	GloG15_CONTIG69224:1524-2699(-)	GMPS	GMP synthase (glutamine-hydrolyzing) activity	36301.4	16059	45958.8	32594.2	38497.7	28653	29615.8	33806.6	39004.2	26510.1	41750.1	46846.3	29129.7	15707.2	30202.2	32175.7	>g|tr|g310229.t1	55529.EKX49437	1.1e-95	357.1	Eukaryota	GO:0000902,GO:0000904,GO:0001101,GO:0003674,GO:0003824,GO:0003921,GO:0003922,GO:0005488,GO:0005515,GO:0005575,GO:0005622,GO:0005623,GO:0005694,GO:0005700,GO:0005737,GO:0005829,GO:0006082,GO:0006139,GO:0006144,GO:0006163,GO:0006164,GO:0006177,GO:0006325,GO:0006464,GO:0006508,GO:0006520,GO:0006541,GO:0006543,GO:0006725,GO:0006753,GO:0006793,GO:0006796,GO:0006807,GO:0006928,GO:0006935,GO:0006996,GO:…	6.3.5.2	ko:K01951,ko:K04257	ko00230,ko00983,ko01100,ko04740,map00230,map00983,map01100,map04740	M00050	R01230,R01231,R08244	RC00010,RC00204	ko00000,ko00001,ko00002,ko01000,ko01002,ko04030				Eukaryota	COG0519@1,KOG1622@2759	NA|NA|NA	F
g|tr|g311376.t1	Foraminifera	167	1	GloG15_CONTIG69833:46-1721(+)			98944.2	278420	35995.9	170609	85670.7	156572	114831	63221.6	86078.4	315618	90358.3	114359	369349	103431	82305	146919
g|tr|g312058.t1	Foraminifera	570	5	GloG15_CONTIG70192:1673-2299,2390-2629,2706-2771(-)	RpS3	Belongs to the universal ribosomal protein uS3 family	1.51193e+06	1.59024e+06	163682	1.04334e+06	2.03833e+06	2.00053e+06	2.61558e+06	1.2966e+06	555162	751966	513272	535221	965160	904388	898180	1.35426e+06	>g|tr|g312058.t1	244447.XP_008307663.1	4.8e-75	288.1	Actinopterygii	GO:0000702,GO:0002181,GO:0003674,GO:0003676,GO:0003677,GO:0003684,GO:0003735,GO:0003824,GO:0003906,GO:0005198,GO:0005488,GO:0005575,GO:0005622,GO:0005623,GO:0005634,GO:0005737,GO:0005829,GO:0005840,GO:0006139,GO:0006259,GO:0006281,GO:0006412,GO:0006518,GO:0006725,GO:0006807,GO:0006950,GO:0006974,GO:0008150,GO:0008152,GO:0008534,GO:0009058,GO:0009059,GO:0009987,GO:0010467,GO:0010941,GO:0015935,GO:…		ko:K02985	ko03010,map03010	M00177			br01610,ko00000,ko00001,ko00002,ko03011				Metazoa	38CWQ@33154,3BI4I@33208,3CRZZ@33213,4840Y@7711,48YGW@7742,49XP1@7898,COG0092@1,KOG3181@2759	NA|NA|NA	J
g|tr|g313864.t1	Foraminifera	248	5	GloG15_CONTIG71140:694-882,962-2230(+)	PDIL5-4	Endoplasmic Reticulum-Golgi Intermediate Compartment (ERGIC)	220661	611745	548055	562353	409085	432961	493399	335168	446264	499211	490929	637063	662565	504474	306147	485733	>g|tr|g313864.t1	272952.HpaP808772	6e-48	198.7	Peronosporales	GO:0003674,GO:0003756,GO:0003824,GO:0016853,GO:0016860,GO:0016864,GO:0140096		ko:K20365,ko:K20367					ko00000,ko04131				Eukaryota	3QE8B@4776,COG0445@1,KOG2667@2759	NA|NA|NA	U
g|tr|g313960.t1	Foraminifera	259	3	GloG15_CONTIG71195:1-1428(+)		Heat shock cognate 70 kDa	110187	515837	322927	544729	763503	560949	925525	458790	663239	1.07731e+06	500649	106801	1.39302e+06	342498	329415	406692	>g|tr|g313960.t1	57918.XP_004307529.1	2.3e-156	558.9	fabids			ko:K03283	ko03040,ko04010,ko04141,ko04144,ko04213,ko04612,ko04915,ko05134,ko05145,ko05162,ko05164,ko05169,map03040,map04010,map04141,map04144,map04213,map04612,map04915,map05134,map05145,map05162,map05164,map05169	M00353,M00355			ko00000,ko00001,ko00002,ko01009,ko03009,ko03029,ko03041,ko03051,ko03110,ko04131,ko04147,ko04516	1.A.33.1			Viridiplantae	37K68@33090,3GAQN@35493,4JI3H@91835,COG0443@1,KOG0101@2759	NA|NA|NA	O
g|tr|g314362.t1	Foraminifera	836	2	GloG15_CONTIG71402:1164-1705,1779-1884(+)	RAB7A	Ras-related protein	459667	529376	711967	553549	356936	437197	217167	483303	670988	594903	196489	92407.8	403326	374885	749095	560679	>g|tr|g314362.t1	192875.XP_004363486.1	3.6e-53	214.9	Opisthokonta	GO:0000003,GO:0000011,GO:0000045,GO:0000166,GO:0000306,GO:0000322,GO:0000323,GO:0000324,GO:0000329,GO:0000407,GO:0001555,GO:0001667,GO:0001775,GO:0001845,GO:0001882,GO:0001883,GO:0001894,GO:0002064,GO:0002065,GO:0002066,GO:0002252,GO:0002263,GO:0002274,GO:0002275,GO:0002283,GO:0002366,GO:0002376,GO:0002443,GO:0002444,GO:0002446,GO:0002478,GO:0002495,GO:0002504,GO:0003002,GO:0003006,GO:0003674,GO:…		ko:K07897	ko04137,ko04138,ko04140,ko04144,ko04145,ko05132,ko05146,ko05152,map04137,map04138,map04140,map04144,map04145,map05132,map05146,map05152				ko00000,ko00001,ko04031,ko04131,ko04147				Opisthokonta	38C61@33154,KOG0394@1,KOG0394@2759	NA|NA|NA	U
g|tr|g314570.t1	Foraminifera	726	1	GloG15_CONTIG71523:1948-2457,2520-2768(-)			230944	150576	26203.4	61275.5	88744.7	62824.2	29037.2	152144	147419	91496.5	88936.3	199214	77478.5	186628	90827.2	164205
g|tr|g314688.t1	Foraminifera	266	1	GloG15_CONTIG71597:221-1013,1100-1722(-)	STK38	protein serine/threonine kinase activity	319482	756462	351583	967660	728962	594389	926722	509394	453052	909583	780753	270336	838139	386820	472378	259729	>g|tr|g314688.t1	227086.JGI_V11_56864	3.3e-99	369.0	Eukaryota	GO:0000003,GO:0000131,GO:0000166,GO:0000287,GO:0000902,GO:0000904,GO:0000920,GO:0001411,GO:0001558,GO:0001932,GO:0001933,GO:0002009,GO:0002165,GO:0003674,GO:0003824,GO:0004672,GO:0004674,GO:0005488,GO:0005515,GO:0005524,GO:0005575,GO:0005622,GO:0005623,GO:0005628,GO:0005634,GO:0005737,GO:0005813,GO:0005815,GO:0005819,GO:0005829,GO:0005856,GO:0005886,GO:0005933,GO:0005934,GO:0005935,GO:0005937,GO:…	2.7.1.37,2.7.11.1	ko:K00870,ko:K08286,ko:K08790					ko00000,ko01000,ko01001				Eukaryota	KOG0605@1,KOG0605@2759	NA|NA|NA	T
g|tr|g315284.t1	Foraminifera	782	1	GloG15_CONTIG71907:131-835(+)	EHD2	Belongs to the TRAFAC class dynamin-like GTPase superfamily. Dynamin Fzo YdjA family	105543	143064	123912	121353	64784.8	137837	121030	148500	180258	178760	81240.2	963.037	168096	75353	173968	169146	>g|tr|g315284.t1	176946.XP_007427037.1	4.4e-28	131.7	Vertebrata	GO:0003674,GO:0005488,GO:0005515,GO:0005575,GO:0005576,GO:0005622,GO:0005623,GO:0005737,GO:0005768,GO:0005829,GO:0005856,GO:0005886,GO:0005901,GO:0006810,GO:0006897,GO:0006996,GO:0007009,GO:0007010,GO:0008104,GO:0008150,GO:0009987,GO:0010008,GO:0010256,GO:0010830,GO:0010831,GO:0012505,GO:0015630,GO:0016020,GO:0016043,GO:0016192,GO:0016197,GO:0019898,GO:0019904,GO:0022603,GO:0030029,GO:0030036,GO:…		ko:K12469	ko04144,map04144				ko00000,ko00001				Metazoa	38D2G@33154,3BBYY@33208,3CWU3@33213,47ZT7@7711,494A3@7742,KOG1954@1,KOG1954@2759	NA|NA|NA	TU
g|tr|g315642.t1	Foraminifera	448	2	GloG15_CONTIG72114:495-919,995-1655(-)	NAGA	alpha-galactosidase activity	421766	359171	356196	270613	246354	246948	401622	295804	270174	250977	236555	2.17989e+06	228964	487737	283594	280704	>g|tr|g315642.t1	10228.TriadP23253	1.1e-78	300.4	Metazoa	GO:0000323,GO:0003674,GO:0003824,GO:0004553,GO:0004557,GO:0005488,GO:0005515,GO:0005575,GO:0005622,GO:0005623,GO:0005737,GO:0005764,GO:0005773,GO:0005975,GO:0006629,GO:0006643,GO:0006664,GO:0006665,GO:0006672,GO:0006677,GO:0006687,GO:0006807,GO:0008150,GO:0008152,GO:0008456,GO:0009056,GO:0009311,GO:0009987,GO:0015925,GO:0015929,GO:0016042,GO:0016052,GO:0016137,GO:0016139,GO:0016787,GO:0016798,GO:…	3.2.1.49	ko:K01204	ko00603,ko04142,map00603,map04142		R05966		ko00000,ko00001,ko01000				Metazoa	38EIP@33154,3BAJ5@33208,KOG2366@1,KOG2366@2759	NA|NA|NA	G
g|tr|g315860.t1	Foraminifera	159	2	GloG15_CONTIG72232:47-332,391-1799(+)	VAMP7	SNAP receptor activity	32626.4	71718.9	54182.1	60890.6	50521.6	35207.2	23306.4	107872	88507.5	74510.3	80054.6	41538.4	54257.8	81054.1	63035.6	58452.3	>g|tr|g315860.t1	157072.XP_008875486.1	1.1e-32	148.3	Eukaryota	GO:0000149,GO:0000288,GO:0000323,GO:0000932,GO:0000956,GO:0001101,GO:0001775,GO:0001906,GO:0001909,GO:0002228,GO:0002252,GO:0002263,GO:0002274,GO:0002275,GO:0002278,GO:0002283,GO:0002285,GO:0002323,GO:0002366,GO:0002376,GO:0002443,GO:0002444,GO:0002446,GO:0002447,GO:0002449,GO:0002682,GO:0002684,GO:0002694,GO:0002696,GO:0002697,GO:0002699,GO:0002703,GO:0002705,GO:0002886,GO:0002888,GO:0003674,GO:…		ko:K08511,ko:K08515	ko04130,map04130				ko00000,ko00001,ko04131,ko04147				Eukaryota	COG5143@1,KOG0859@2759	NA|NA|NA	U
g|tr|g317278.t1	Foraminifera	756	7	GloG15_CONTIG73006:1946-2501,2582-2751(+)		Cytochrome c oxidase subunit	395171	555509	734262	554976	496924	871055	1.115e+06	310615	371201	422654	422455	575804	643482	271589	508546	266551	>g|tr|g317278.t1	71139.XP_010061943.1	5.6e-10	71.6	Streptophyta	GO:0003674,GO:0005488,GO:0005575,GO:0005622,GO:0005623,GO:0005737,GO:0005739,GO:0005740,GO:0005743,GO:0005746,GO:0005751,GO:0006091,GO:0006119,GO:0006123,GO:0006139,GO:0006163,GO:0006164,GO:0006725,GO:0006753,GO:0006754,GO:0006793,GO:0006796,GO:0006807,GO:0006810,GO:0006811,GO:0006812,GO:0006839,GO:0008150,GO:0008152,GO:0008270,GO:0009058,GO:0009060,GO:0009117,GO:0009123,GO:0009124,GO:0009126,GO:…		ko:K02265	ko00190,ko01100,ko04260,ko04714,ko04932,ko05010,ko05012,ko05016,map00190,map01100,map04260,map04714,map04932,map05010,map05012,map05016	M00154			ko00000,ko00001,ko00002	3.D.4.11,3.D.4.8			Viridiplantae	37UP7@33090,3GI0P@35493,KOG3352@1,KOG3352@2759	NA|NA|NA	C
g|tr|g317621.t1	Foraminifera	532	5	GloG15_CONTIG73179:1624-2595(+)	LYS21	Belongs to the alpha-IPM synthase homocitrate synthase family	298252	252133	267505	249984	235250	450737	510849	245431	367206	244065	233886	210341	311657	267317	421623	241787	>g|tr|g317621.t1	121759.XP_010756997.1	1.7e-102	379.4	Onygenales	GO:0001207,GO:0003674,GO:0003824,GO:0004410,GO:0005575,GO:0005622,GO:0005623,GO:0005634,GO:0005737,GO:0005739,GO:0006082,GO:0006139,GO:0006259,GO:0006281,GO:0006325,GO:0006520,GO:0006553,GO:0006725,GO:0006807,GO:0006950,GO:0006974,GO:0006996,GO:0008150,GO:0008152,GO:0008652,GO:0009058,GO:0009066,GO:0009067,GO:0009085,GO:0009987,GO:0016043,GO:0016053,GO:0016740,GO:0016746,GO:0019752,GO:0019878,GO:…	2.3.3.14	ko:K01655	ko00300,ko00620,ko01100,ko01120,ko01130,ko01210,ko01230,map00300,map00620,map01100,map01120,map01130,map01210,map01230	M00030,M00433	R00271	RC00004,RC00067,RC02754	br01601,ko00000,ko00001,ko00002,ko01000				Fungi	20EH7@147545,38E9U@33154,3B0DS@33183,3FKUN@34383,3NUMJ@4751,3QM1I@4890,COG0119@1,KOG2367@2759	NA|NA|NA	E
g|tr|g318951.t1	Foraminifera	110	1	GloG15_CONTIG73884:622-943,1014-1328,1408-2732(+)	RPN2	26S proteasome non-ATPase regulatory subunit. Source PGD	101452	230691	496491	425733	271782	333096	529392	255791	204615	185647	177344	357322	264247	156526	188782	177949	>g|tr|g318951.t1	42099.EPrPV00000015693	4e-95	355.9	Pythiales	GO:0000502,GO:0003674,GO:0003824,GO:0004175,GO:0005488,GO:0005515,GO:0005575,GO:0005622,GO:0005623,GO:0005634,GO:0005737,GO:0005829,GO:0005838,GO:0005886,GO:0006508,GO:0006511,GO:0006807,GO:0007088,GO:0007346,GO:0008150,GO:0008152,GO:0008233,GO:0008540,GO:0009056,GO:0009057,GO:0009896,GO:0009987,GO:0010498,GO:0010564,GO:0010638,GO:0010965,GO:0016020,GO:0016043,GO:0016787,GO:0019538,GO:0019941,GO:…		ko:K03032	ko03050,ko05169,map03050,map05169	M00341			ko00000,ko00001,ko00002,ko03051				Eukaryota	1MEZ4@121069,COG5116@1,KOG2062@2759	NA|NA|NA	O
g|tr|g319534.t1	Foraminifera	891	2	GloG15_CONTIG74202:841-1278,1340-1507(-)	PPP4C	Serine threonine-protein phosphatase	109568	93405.4	73162.1	125188	107736	165561	200847	122963	143096	130577	31762.9	22509.9	177781	80781.9	216121	200383	>g|tr|g319534.t1	112098.XP_008613707.1	1.4e-83	315.8	Eukaryota	GO:0000003,GO:0000018,GO:0000278,GO:0000775,GO:0000902,GO:0000904,GO:0001525,GO:0001568,GO:0001944,GO:0003002,GO:0003674,GO:0003824,GO:0004704,GO:0004721,GO:0004722,GO:0005488,GO:0005515,GO:0005521,GO:0005575,GO:0005622,GO:0005623,GO:0005634,GO:0005654,GO:0005694,GO:0005730,GO:0005737,GO:0005739,GO:0005813,GO:0005815,GO:0005829,GO:0005856,GO:0005886,GO:0006282,GO:0006355,GO:0006357,GO:0006464,GO:…	3.1.3.16	ko:K15423	ko04922,map04922				ko00000,ko00001,ko01000,ko01009,ko03400				Eukaryota	COG0639@1,KOG0372@2759	NA|NA|NA	T
g|tr|g319998.t1	Foraminifera	384	1	GloG15_CONTIG74439:172-554,608-1112,1171-1183,1260-1314,1681-1912(-)	ACP5	Acid phosphatase	50032.8	59846.7	49746.7	54777.7	112325	174971	87135.8	68333.6	93037.7	74959.3	3397.61	4971.62	25509.1	13568.4	22393.8	95183.1	>g|tr|g319998.t1	8479.XP_008161541.1	7.1e-71	274.6	Testudines	GO:0000323,GO:0001101,GO:0001501,GO:0001503,GO:0001505,GO:0001817,GO:0001818,GO:0001894,GO:0002237,GO:0002376,GO:0002520,GO:0002521,GO:0002573,GO:0003674,GO:0003824,GO:0003993,GO:0005488,GO:0005506,GO:0005575,GO:0005576,GO:0005615,GO:0005622,GO:0005623,GO:0005737,GO:0005764,GO:0005773,GO:0005829,GO:0006766,GO:0006767,GO:0006771,GO:0006793,GO:0006796,GO:0006807,GO:0006950,GO:0006952,GO:0007162,GO:…	3.1.3.2	ko:K14379	ko00740,ko01100,ko04142,ko04380,ko05323,map00740,map01100,map04142,map04380,map05323		R00548	RC00017	ko00000,ko00001,ko01000				Metazoa	39T6Y@33154,3BF3E@33208,3CRTN@33213,488VV@7711,48ZYD@7742,4CDHS@8459,COG1409@1,KOG2679@2759	NA|NA|NA	O
g|tr|g320260.t1-tr|B8BS84|B8BS84_THAPS(82.51%)	Both	937	28	Adp-ribosylation factor OS=Thalassiosira pseudonana GN=ARF3 PE=3 SV=1		ADP-ribosylation factor family. Source PGD	3.3922e+06	2.58883e+06	1.99939e+06	2.53556e+06	2.32703e+06	2.31961e+06	1.9183e+06	2.94601e+06	3.39344e+06	2.62965e+06	2.58501e+06	1.55057e+06	2.41048e+06	3.11676e+06	3.61768e+06	3.34151e+06	>g|tr|g320260.t1	65071.PYU1_T010133	5e-83	313.9	Pythiales			ko:K07937,ko:K07977	ko04072,ko04144,ko05110,ko05134,map04072,map04144,map05110,map05134				ko00000,ko00001,ko04031,ko04131,ko04147				Eukaryota	1MGVB@121069,COG1100@1,KOG0070@2759	NA|NA|NA	U
g|tr|g320873.t1	Foraminifera	364	1	GloG15_CONTIG74912:814-1094,1163-1859,1920-1940,2009-2227(-)		Pectate lyase superfamily protein	166587	42680.5	149919	62168.7	95324.7	64139.7	19874.9	113675	98635.3	102019	53362	285465	119594	159011	128777	128100	>g|tr|g320873.t1	946362.XP_004994219.1	3.9e-125	454.9	Eukaryota												Eukaryota	292VX@1,2R9SM@2759	NA|NA|NA	S
g|tr|g321164.t1	Foraminifera	95	1	GloG15_CONTIG75070:1-2038(-)		Belongs to the DEAD box helicase family	564827	842696	55678.6	656278	804740	670124	320869	774011	563564	631573	75822	49082.9	150763	317347	1.24977e+06	593347	>g|tr|g321164.t1	5821.PBANKA_146450	8.7e-77	295.0	Haemosporida	GO:0000245,GO:0000346,GO:0000375,GO:0000377,GO:0000398,GO:0003674,GO:0003676,GO:0003723,GO:0003724,GO:0003824,GO:0004004,GO:0004386,GO:0005488,GO:0005515,GO:0005575,GO:0005622,GO:0005623,GO:0005634,GO:0005654,GO:0005681,GO:0005730,GO:0005737,GO:0006139,GO:0006355,GO:0006396,GO:0006397,GO:0006403,GO:0006405,GO:0006406,GO:0006611,GO:0006725,GO:0006807,GO:0006810,GO:0006886,GO:0006913,GO:0008026,GO:…	3.6.4.13	ko:K13181					ko00000,ko01000,ko03009,ko03041				Apicomplexa	3KA5D@422676,3Y9QF@5794,3YYT7@5819,COG0513@1,KOG0338@2759	NA|NA|NA	A
g|tr|g321934.t1	Foraminifera	813	2	GloG15_CONTIG75481:1105-1411,1487-1845(-)			282754	297254	214385	250932	233874	196621	157748	194329	266462	200786	101552	210305	208399	183797	187275	263829
g|tr|g322605.t1	Foraminifera	376	3	GloG15_CONTIG75854:1251-2456(+)		Mandelate racemase / muconate lactonizing enzyme, C-terminal domain	501181	711395	120521	516504	669110	605632	389227	452862	244511	441853	354038	124997	415077	361717	465769	603892	>g|tr|g322605.t1	595460.RRSWK_07151	4.3e-124	451.4	Planctomycetes	GO:0000287,GO:0001101,GO:0003674,GO:0003824,GO:0005488,GO:0006082,GO:0006520,GO:0006807,GO:0008150,GO:0008152,GO:0009719,GO:0009987,GO:0010033,GO:0010243,GO:0016597,GO:0016829,GO:0016835,GO:0016836,GO:0019752,GO:0031406,GO:0036094,GO:0042221,GO:0043167,GO:0043168,GO:0043169,GO:0043177,GO:0043200,GO:0043436,GO:0044237,GO:0044238,GO:0044281,GO:0046872,GO:0050896,GO:0051716,GO:0070887,GO:0071229,GO:…	4.2.1.171	ko:K21624	ko00330,map00330		R11625		ko00000,ko00001,ko01000				Bacteria	2IY85@203682,COG4948@1,COG4948@2	NA|NA|NA	M
g|tr|g322803.t1	Foraminifera	210	2	GloG15_CONTIG75960:903-2447(+)		Catalytic subunit of the tRNA-splicing ligase complex that acts by directly joining spliced tRNA halves to mature-sized tRNAs by incorporating the precursor-derived splice junction phosphate into the mature tRNA as a canonical 3',5'- phosphodiester. May act as a RNA ligase with broad substrate specificity, and may function toward other RNAs	12418.7	154914	40335.5	131624	141270	59659.9	151834	99039.6	62384.5	333632	119075	86537.9	168696	89418.4	29824.8	104994	>g|tr|g322803.t1	7222.FBpp0147355	9.1e-220	769.6	Drosophilidae	GO:0008150,GO:0009893,GO:0010468,GO:0010604,GO:0010628,GO:0019219,GO:0019222,GO:0031323,GO:0031325,GO:0045935,GO:0048518,GO:0048522,GO:0050789,GO:0050794,GO:0051171,GO:0051173,GO:0051252,GO:0051254,GO:0060255,GO:0065007,GO:0080090,GO:1903326,GO:1903328,GO:2000235,GO:2000237	6.5.1.3	ko:K14415					ko00000,ko01000,ko03016				Arthropoda	38CK6@33154,3BD7J@33208,3CV3F@33213,3SHZ8@50557,41TW1@6656,45288@7147,45TJI@7214,COG1690@1,KOG3833@2759	NA|NA|NA	J
g|tr|g323165.t1	Foraminifera	1056	2	GloG15_CONTIG76156:49-486(-)			126780	208080	207221	165182	186000	150235	206379	103151	159849	146796	207094	337620	222897	240290	130094	182232
g|tr|g323858.t1	Foraminifera	135	1	GloG15_CONTIG76526:93-1952(-)	GCLC	Glutamate-cysteine ligase, catalytic subunit	198135	263752	174765	283541	207896	332537	436386	189780	520345	193248	638250	88302.2	704134	558070	180449	229377	>g|tr|g323858.t1	13616.ENSMODP00000023448	8.6e-148	530.8	Metatheria	GO:0000096,GO:0000166,GO:0000287,GO:0001101,GO:0001678,GO:0003008,GO:0003013,GO:0003018,GO:0003254,GO:0003674,GO:0003824,GO:0004357,GO:0005488,GO:0005515,GO:0005575,GO:0005622,GO:0005623,GO:0005737,GO:0005829,GO:0005975,GO:0005996,GO:0006082,GO:0006355,GO:0006518,GO:0006520,GO:0006534,GO:0006536,GO:0006575,GO:0006732,GO:0006749,GO:0006750,GO:0006766,GO:0006767,GO:0006790,GO:0006807,GO:0006915,GO:…	6.3.2.2	ko:K11204	ko00270,ko00480,ko01100,ko04212,ko04216,map00270,map00480,map01100,map04212,map04216	M00118	R00894,R10993	RC00064,RC00090	ko00000,ko00001,ko00002,ko01000				Mammalia	38BDB@33154,3BAJC@33208,3CXBU@33213,3J4AN@40674,481BZ@7711,48ZNY@7742,4JYTR@9263,KOG3754@1,KOG3754@2759	NA|NA|NA	H
g|tr|g323867.t1	Foraminifera	129	14	GloG15_CONTIG76531:344-2224(-)	VHA-A	proton-transporting ATPase activity, rotational mechanism	1.0676e+06	757711	687995	786287	922869	886697	710641	1.47821e+06	1.28446e+06	1.00935e+06	609319	488815	906286	916840	854850	982019	>g|tr|g323867.t1	112098.XP_008620499.1	2.1e-226	792.0	Eukaryota	GO:0000325,GO:0002020,GO:0003674,GO:0003824,GO:0005215,GO:0005488,GO:0005515,GO:0005575,GO:0005576,GO:0005618,GO:0005622,GO:0005623,GO:0005737,GO:0005773,GO:0005774,GO:0005794,GO:0005886,GO:0005911,GO:0006810,GO:0006811,GO:0006812,GO:0006950,GO:0006970,GO:0006996,GO:0007030,GO:0007275,GO:0008150,GO:0008324,GO:0009506,GO:0009507,GO:0009526,GO:0009536,GO:0009555,GO:0009628,GO:0009651,GO:0009941,GO:…	3.6.3.14	ko:K02145	ko00190,ko01100,ko04145,ko04150,ko04721,ko04966,ko05110,ko05120,ko05323,map00190,map01100,map04145,map04150,map04721,map04966,map05110,map05120,map05323	M00160			ko00000,ko00001,ko00002,ko01000	3.A.2.2			Eukaryota	COG1155@1,KOG1352@2759	NA|NA|NA	C
g|tr|g325079.t1	Foraminifera	435	2	GloG15_CONTIG77203:1238-2344(+)	pfp	Catalyzes the phosphorylation of D-fructose 6-phosphate, the first committing step of glycolysis. Uses inorganic phosphate (PPi) as phosphoryl donor instead of ATP like common ATP-dependent phosphofructokinases (ATP-PFKs), which renders the reaction reversible, and can thus function both in glycolysis and gluconeogenesis. Consistently, PPi-PFK can replace the enzymes of both the forward (ATP-PFK)…	41197.5	34503.6	121874	38057.3	67530.4	29781.6	85818.3	48452.9	64082.3	79439.5	50614.5	64613.2	100987	39194.1	206098	55714.2	>g|tr|g325079.t1	331113.SNE_A09660	3.1e-97	362.1	Chlamydiae	GO:0000287,GO:0003674,GO:0003824,GO:0005488,GO:0005975,GO:0006002,GO:0006793,GO:0006796,GO:0008150,GO:0008152,GO:0008443,GO:0009987,GO:0016301,GO:0016310,GO:0016740,GO:0016772,GO:0016773,GO:0019200,GO:0019637,GO:0043167,GO:0043169,GO:0044237,GO:0044238,GO:0044262,GO:0046835,GO:0046872,GO:0047334,GO:0071704,GO:1901135	2.7.1.11,2.7.1.90	ko:K00895,ko:K21071	ko00010,ko00030,ko00051,ko00052,ko00680,ko01100,ko01110,ko01120,ko01130,map00010,map00030,map00051,map00052,map00680,map01100,map01110,map01120,map01130		R00756,R00764,R02073,R03236,R04779	RC00002,RC00017	ko00000,ko00001,ko01000				Bacteria	2JFH8@204428,COG0205@1,COG0205@2	NA|NA|NA	H
g|tr|g325131.t1	Foraminifera	169	4	GloG15_CONTIG77233:592-1260,1368-1761,1819-2420(+)	fadN	Belongs to the enoyl-CoA hydratase isomerase family	347564	1.16576e+06	1.19547e+06	1.17529e+06	1.14012e+06	1.06781e+06	1.913e+06	928430	812929	1.34343e+06	1.12777e+06	2.63888e+06	1.10676e+06	802383	565336	897021	>g|tr|g325131.t1	626887.J057_06051	5.3e-125	454.9	Alteromonadaceae		1.1.1.35	ko:K07516	ko00071,ko00362,ko00650,ko01100,ko01120,ko01200,ko01212,map00071,map00362,map00650,map01100,map01120,map01200,map01212	M00087	R01975,R04737,R04739,R04741,R04743,R04745,R04748,R05305	RC00029,RC00117	ko00000,ko00001,ko00002,ko01000				Bacteria	1MU9P@1224,1RMZ8@1236,464P3@72275,COG1024@1,COG1024@2,COG1250@1,COG1250@2	NA|NA|NA	I
g|tr|g326657.t1	Foraminifera	679	8	GloG15_CONTIG78094:1841-2641(+)		Serine/Threonine protein kinases, catalytic domain	884379	1.07136e+06	909504	1.00473e+06	1.06366e+06	1.01791e+06	1.2849e+06	1.13951e+06	1.11348e+06	1.08766e+06	774457	1.56282e+06	1.18e+06	1.05071e+06	836775	1.17075e+06	>g|tr|g326657.t1	5888.CAK74783	9.3e-59	233.8	Ciliophora		2.7.11.1,2.7.11.17	ko:K05869,ko:K08794,ko:K17530	ko04020,ko04024,ko04211,ko04371,ko04380,ko04720,ko04722,ko04725,ko04921,ko04925,ko05031,ko05034,map04020,map04024,map04211,map04371,map04380,map04720,map04722,map04725,map04921,map04925,map05031,map05034				ko00000,ko00001,ko01000,ko01001				Eukaryota	3ZD9J@5878,KOG0032@1,KOG0032@2759	NA|NA|NA	T
g|tr|g326741.t1	Foraminifera	272	5	GloG15_CONTIG78145:1186-2168,2232-2640(+)	HSP78	ATP binding	70871	401046	244603	331119	182058	164805	209431	252554	252546	305310	345449	201556	353318	201799	113677	194805	>g|tr|g326741.t1	157072.XP_008871936.1	3.1e-118	432.2	Eukaryota	GO:0000002,GO:0000166,GO:0003674,GO:0003824,GO:0005488,GO:0005515,GO:0005524,GO:0005575,GO:0005622,GO:0005623,GO:0005737,GO:0005739,GO:0005759,GO:0006457,GO:0006950,GO:0006996,GO:0007005,GO:0008144,GO:0008150,GO:0009266,GO:0009408,GO:0009628,GO:0009987,GO:0016043,GO:0016462,GO:0016787,GO:0016817,GO:0016818,GO:0016887,GO:0017076,GO:0017111,GO:0030554,GO:0031647,GO:0031974,GO:0032553,GO:0032555,GO:…	3.6.1.3	ko:K01509,ko:K03695	ko00230,ko04213,ko04742,map00230,map04213,map04742		R00086	RC00002	ko00000,ko00001,ko01000,ko03110				Eukaryota	COG0542@1,KOG1051@2759	NA|NA|NA	O
g|tr|g328103.t1	Foraminifera	655	2	GloG15_CONTIG78916:1737-1988,2055-2625(+)	PDHB	pyruvate dehydrogenase (acetyl-transferring) activity	767739	752128	157098	491768	845015	985520	1.08697e+06	718949	685718	662769	511116	162340	1.03703e+06	664767	877713	826046	>g|tr|g328103.t1	653948.CCA23799	2.6e-80	305.4	Eukaryota	GO:0003674,GO:0003824,GO:0004738,GO:0004739,GO:0005575,GO:0005576,GO:0005622,GO:0005623,GO:0005634,GO:0005654,GO:0005730,GO:0005737,GO:0005739,GO:0005759,GO:0005773,GO:0005774,GO:0005967,GO:0006082,GO:0006084,GO:0006085,GO:0006086,GO:0006090,GO:0006091,GO:0006099,GO:0006101,GO:0006139,GO:0006163,GO:0006164,GO:0006637,GO:0006725,GO:0006732,GO:0006733,GO:0006753,GO:0006790,GO:0006793,GO:0006796,GO:…	1.2.4.1,2.1.1.43	ko:K00162,ko:K09189,ko:K12599	ko00010,ko00020,ko00310,ko00620,ko01100,ko01110,ko01120,ko01130,ko01200,ko03018,ko04066,ko04922,ko05230,map00010,map00020,map00310,map00620,map01100,map01110,map01120,map01130,map01200,map03018,map04066,map04922,map05230	M00307,M00392	R00014,R00209,R01699,R03270,R03875,R03938,R04866,R04867	RC00003,RC00004,RC00027,RC00060,RC00181,RC00496,RC00627,RC02742,RC02744,RC02882	br01601,ko00000,ko00001,ko00002,ko01000,ko03000,ko03019,ko03036				Eukaryota	COG0022@1,KOG0524@2759	NA|NA|NA	C
g|tr|g328319.t1	Foraminifera	636	2	GloG15_CONTIG79027:127-208,276-1042(-)	rapB	GTP binding	806060	571544	413415	429451	615874	538339	558380	720894	802960	644771	774907	1.19217e+06	602870	725781	665547	734193	>g|tr|g328319.t1	227086.JGI_V11_91572	4.9e-42	178.3	Eukaryota			ko:K04353,ko:K07208	ko04010,ko04014,ko04015,ko04024,ko04062,ko04072,ko04140,ko04150,ko04151,ko04152,ko04211,ko04218,ko04510,ko04530,ko04611,ko04670,ko04714,ko04720,ko04722,ko04910,ko04919,ko04934,ko04972,ko05165,ko05211,ko05231,map04010,map04014,map04015,map04024,map04062,map04072,map04140,map04150,map04151,map04152,map04211,map04218,map04510,map04530,map04611,map04670,map04714,map04720,map04722,map04910,map04919,ma…				ko00000,ko00001,ko04031				Eukaryota	COG1100@1,KOG0395@2759	NA|NA|NA	S
g|tr|g329741.t1	Foraminifera	538	1	GloG15_CONTIG79843:1211-2173(+)		quinolinate catabolic process	131982	129076	40750.7	94783	109267	67419.4	106818	166096	87740.9	83809.7	90722.9	40570.2	83893.2	138496	89210.8	117068	>g|tr|g329741.t1	227086.JGI_V11_87812	1e-80	307.0	Eukaryota	GO:0003674,GO:0003824,GO:0004514,GO:0005575,GO:0005622,GO:0005623,GO:0005737,GO:0006082,GO:0006139,GO:0006725,GO:0006732,GO:0006733,GO:0006753,GO:0006793,GO:0006796,GO:0006807,GO:0008150,GO:0008152,GO:0009056,GO:0009058,GO:0009108,GO:0009117,GO:0009165,GO:0009435,GO:0009507,GO:0009536,GO:0009987,GO:0016054,GO:0016740,GO:0016757,GO:0016763,GO:0017144,GO:0018130,GO:0019359,GO:0019362,GO:0019363,GO:…	2.4.2.19	ko:K00767,ko:K12831	ko00760,ko01100,ko03040,map00760,map01100,map03040	M00115,M00352	R03348	RC02877	ko00000,ko00001,ko00002,ko01000,ko03041				Eukaryota	COG0157@1,KOG3008@2759	NA|NA|NA	H
g|tr|g330157.t1	Foraminifera	980	4	GloG15_CONTIG80091:1-520(-)	ACT1	Belongs to the actin family	1.206e+06	1.09515e+06	1.21329e+06	1.09672e+06	1.29917e+06	1.07526e+06	1.18629e+06	2.54751e+06	1.49704e+06	1.21367e+06	990495	881459	1.10347e+06	1.68111e+06	1.19306e+06	1.34366e+06	>g|tr|g330157.t1	4897.EEB08018	6.7e-66	256.9	Taphrinomycotina	GO:0000001,GO:0000003,GO:0000011,GO:0000123,GO:0000132,GO:0000142,GO:0000226,GO:0000228,GO:0000278,GO:0000281,GO:0000785,GO:0000790,GO:0000812,GO:0000910,GO:0000912,GO:0000915,GO:0000916,GO:0001300,GO:0001411,GO:0002790,GO:0003006,GO:0003674,GO:0005198,GO:0005200,GO:0005575,GO:0005622,GO:0005623,GO:0005628,GO:0005634,GO:0005654,GO:0005694,GO:0005737,GO:0005826,GO:0005829,GO:0005856,GO:0005884,GO:…		ko:K05692	ko04015,ko04145,ko04210,ko04390,ko04391,ko04510,ko04520,ko04530,ko04611,ko04670,ko04714,ko04745,ko04810,ko04919,ko04921,ko05100,ko05110,ko05130,ko05131,ko05132,ko05164,ko05205,ko05225,ko05410,ko05412,ko05414,ko05416,ko05418,map04015,map04145,map04210,map04390,map04391,map04510,map04520,map04530,map04611,map04670,map04714,map04745,map04810,map04919,map04921,map05100,map05110,map05130,map05131,map0…				ko00000,ko00001,ko03019,ko03021,ko03029,ko03036,ko04147,ko04812				Fungi	38C0D@33154,3MDMM@451866,3NWC7@4751,3QK5Q@4890,COG5277@1,KOG0676@2759	NA|NA|NA	Z
g|tr|g330735.t1	Foraminifera	731	1	GloG15_CONTIG80432:296-1020,1095-1125(+)		Belongs to the short-chain dehydrogenases reductases (SDR) family	643403	364324	587142	392293	480117	423239	318951	596366	311474	392784	382202	674477	382547	306943	528076	605413	>g|tr|g330735.t1	218851.Aquca_010_00673.1	5.2e-43	181.4	Streptophyta		1.1.1.330,1.1.1.62	ko:K10251	ko00062,ko00140,ko01040,ko01100,ko01110,ko01212,map00062,map00140,map01040,map01100,map01110,map01212	M00415	R02352,R02353,R04681,R04682,R07759,R08945,R08980,R10826	RC00029,RC00103,RC00127,RC00261	ko00000,ko00001,ko00002,ko01000,ko01004				Viridiplantae	2QSBK@2759,37QRQ@33090,3GHHK@35493,COG0300@1	NA|NA|NA	Q
g|tr|g331651.t1	Foraminifera	442	7	GloG15_CONTIG80934:1-615,692-1165(-)	ATP4A	sodium:potassium-exchanging ATPase activity	1.53764e+06	3.07091e+06	2.1021e+06	2.63785e+06	2.49613e+06	2.12734e+06	2.43349e+06	2.39449e+06	2.89791e+06	3.10967e+06	1.54866e+06	2.14275e+06	3.51413e+06	1.92848e+06	1.60321e+06	2.28724e+06	>g|tr|g331651.t1	2880.D7FLP6	4.4e-67	261.9	Eukaryota	GO:0000003,GO:0000166,GO:0001101,GO:0001504,GO:0001505,GO:0001508,GO:0001540,GO:0001664,GO:0001696,GO:0001700,GO:0001894,GO:0002026,GO:0002028,GO:0002036,GO:0002087,GO:0003008,GO:0003012,GO:0003013,GO:0003015,GO:0003018,GO:0003674,GO:0003824,GO:0005102,GO:0005215,GO:0005391,GO:0005488,GO:0005496,GO:0005515,GO:0005524,GO:0005575,GO:0005622,GO:0005623,GO:0005634,GO:0005737,GO:0005768,GO:0005783,GO:…	3.6.3.10,3.6.3.9	ko:K01539,ko:K01541,ko:K01542,ko:K01544	ko00190,ko04022,ko04024,ko04260,ko04261,ko04911,ko04918,ko04919,ko04925,ko04960,ko04961,ko04964,ko04966,ko04970,ko04971,ko04972,ko04973,ko04974,ko04976,ko04978,map00190,map04022,map04024,map04260,map04261,map04911,map04918,map04919,map04925,map04960,map04961,map04964,map04966,map04970,map04971,map04972,map04973,map04974,map04976,map04978				ko00000,ko00001,ko01000,ko04147	3.A.3.1,3.A.3.1.2,3.A.3.1.4			Eukaryota	COG0474@1,KOG0203@2759	NA|NA|NA	P
g|tr|g332754.t1	Foraminifera	191	1	GloG15_CONTIG81579:727-976,1089-1925,2023-2534(+)	GFPT1	SIS domain	194360	222961	41612.2	132724	141735	334674	432257	143689	223884	191482	44074.3	6386.81	243253	140672	196722	178680	>g|tr|g332754.t1	5786.XP_003285395.1	8.7e-133	480.7	Amoebozoa	GO:0000271,GO:0003674,GO:0003824,GO:0004360,GO:0005488,GO:0005515,GO:0005575,GO:0005622,GO:0005623,GO:0005737,GO:0005829,GO:0005975,GO:0005976,GO:0005979,GO:0006002,GO:0006022,GO:0006023,GO:0006030,GO:0006031,GO:0006037,GO:0006038,GO:0006040,GO:0006041,GO:0006042,GO:0006047,GO:0006048,GO:0006082,GO:0006091,GO:0006109,GO:0006112,GO:0006139,GO:0006464,GO:0006486,GO:0006487,GO:0006520,GO:0006541,GO:…	2.6.1.16	ko:K00820	ko00250,ko00520,ko01100,ko01130,ko04931,map00250,map00520,map01100,map01130,map04931		R00768	RC00010,RC00163,RC02752	ko00000,ko00001,ko01000,ko01002			iMM904.YKL104C,iND750.YKL104C	Eukaryota	3X899@554915,COG0449@1,KOG1268@2759	NA|NA|NA	M
g|tr|g332908.t1	Foraminifera	942	3	GloG15_CONTIG81674:306-690,775-862,938-963,1019-1035,1088-1120,1197-1211(-)		Belongs to the small GTPase superfamily. Rho family	269098	191958	198034	183782	203069	186924	162139	248020	347211	304093	284893	117844	317353	479230	275165	307363	>g|tr|g332908.t1	40127.XP_009855220.1	1.1e-66	259.6	Sordariaceae			ko:K04392,ko:K07861	ko04010,ko04013,ko04014,ko04015,ko04024,ko04062,ko04071,ko04145,ko04151,ko04310,ko04360,ko04370,ko04380,ko04510,ko04520,ko04530,ko04620,ko04650,ko04662,ko04664,ko04666,ko04670,ko04722,ko04810,ko04932,ko04933,ko04972,ko05014,ko05100,ko05120,ko05131,ko05132,ko05167,ko05200,ko05203,ko05205,ko05210,ko05211,ko05212,ko05231,ko05416,ko05418,map04010,map04013,map04014,map04015,map04024,map04062,map04071,…				ko00000,ko00001,ko04031,ko04131,ko04147				Fungi	212BC@147550,38BJN@33154,3NWUJ@4751,3QQJC@4890,3U75T@5139,3UKE0@5148,COG1100@1,KOG0393@2759	NA|NA|NA	U
g|tr|g333494.t1	Foraminifera	54	2	GloG15_CONTIG82010:41-1579,1641-2563(+)	acaca	acetyl-CoA carboxylase activity	87519.7	298125	355629	334817	244535	288602	264918	108718	191655	688506	147300	148837	533018	128814	187445	192737	>g|tr|g333494.t1	10228.TriadP22916	1.2e-53	218.4	Metazoa	GO:0002119,GO:0002164,GO:0003002,GO:0003674,GO:0003824,GO:0003989,GO:0005575,GO:0005622,GO:0005623,GO:0005737,GO:0005783,GO:0005789,GO:0006082,GO:0006629,GO:0006631,GO:0006633,GO:0007163,GO:0007275,GO:0007389,GO:0008150,GO:0008152,GO:0008610,GO:0009058,GO:0009791,GO:0009798,GO:0009948,GO:0009949,GO:0009952,GO:0009987,GO:0012505,GO:0016020,GO:0016053,GO:0016421,GO:0016874,GO:0016885,GO:0019752,GO:…	2.1.3.15,6.3.4.14,6.4.1.2	ko:K11262	ko00061,ko00254,ko00620,ko00640,ko01100,ko01110,ko01212,ko04152,ko04910,ko04922,map00061,map00254,map00620,map00640,map01100,map01110,map01212,map04152,map04910,map04922	M00082	R00742,R04385,R04386	RC00040,RC00253,RC00367	ko00000,ko00001,ko00002,ko01000				Metazoa	38BBT@33154,3BD6M@33208,COG0439@1,KOG0368@2759	NA|NA|NA	I
g|tr|g334032.t1	Foraminifera	438	2	GloG15_CONTIG82329:1-1101(+)	DLD	dihydrolipoyl dehydrogenase activity	1.73058e+06	2.75684e+06	2.31892e+06	2.58424e+06	2.25246e+06	3.72174e+06	4.76364e+06	2.49828e+06	2.48831e+06	2.15758e+06	1.39313e+06	2.02586e+06	3.24069e+06	2.10419e+06	2.68922e+06	2.9859e+06	>g|tr|g334032.t1	227086.JGI_V11_87173	1.8e-121	442.6	Eukaryota	GO:0000003,GO:0000166,GO:0001505,GO:0001669,GO:0003006,GO:0003674,GO:0003824,GO:0004148,GO:0004375,GO:0004591,GO:0004738,GO:0004739,GO:0005488,GO:0005575,GO:0005622,GO:0005623,GO:0005634,GO:0005654,GO:0005737,GO:0005739,GO:0005759,GO:0005773,GO:0005929,GO:0005947,GO:0005960,GO:0005967,GO:0006082,GO:0006084,GO:0006085,GO:0006086,GO:0006090,GO:0006091,GO:0006099,GO:0006101,GO:0006103,GO:0006119,GO:…	1.8.1.4	ko:K00382,ko:K17583	ko00010,ko00020,ko00260,ko00280,ko00620,ko00630,ko00640,ko01100,ko01110,ko01120,ko01130,ko01200,map00010,map00020,map00260,map00280,map00620,map00630,map00640,map01100,map01110,map01120,map01130,map01200	M00009,M00011,M00036,M00307,M00532	R00209,R01221,R01698,R03815,R07618,R08549	RC00004,RC00022,RC00583,RC02742,RC02833,RC02834	br01601,ko00000,ko00001,ko00002,ko01000,ko01009,ko04147				Eukaryota	COG1249@1,KOG1335@2759	NA|NA|NA	C
g|tr|g335367.t1	Foraminifera	1089	2	GloG15_CONTIG83100:1-396(+)	HSP82	to Saccharomyces cerevisiae HSC82 (YMR186W) and HSP82 (YPL240C)	1.44942e+06	1.06129e+06	1.29547e+06	926959	1.0283e+06	1.04169e+06	1.15039e+06	1.43323e+06	1.27851e+06	1.12728e+06	1.98977e+06	1.69617e+06	1.41666e+06	1.55031e+06	1.49762e+06	1.76867e+06	>g|tr|g335367.t1	4950.XP_003679223.1	6.9e-07	60.5	Saccharomycetaceae	GO:0000166,GO:0000491,GO:0000492,GO:0000723,GO:0003674,GO:0003824,GO:0005488,GO:0005515,GO:0005524,GO:0005575,GO:0005618,GO:0005622,GO:0005623,GO:0005737,GO:0005739,GO:0005829,GO:0005886,GO:0006139,GO:0006259,GO:0006457,GO:0006458,GO:0006605,GO:0006626,GO:0006725,GO:0006807,GO:0006810,GO:0006839,GO:0006886,GO:0006950,GO:0006970,GO:0006996,GO:0007005,GO:0007154,GO:0007165,GO:0008104,GO:0008144,GO:…		ko:K04079	ko04141,ko04151,ko04217,ko04612,ko04621,ko04626,ko04657,ko04659,ko04914,ko04915,ko05200,ko05215,ko05418,map04141,map04151,map04217,map04612,map04621,map04626,map04657,map04659,map04914,map04915,map05200,map05215,map05418				ko00000,ko00001,ko01009,ko03029,ko03051,ko03110,ko04131,ko04147				Fungi	38B7K@33154,3NW2G@4751,3QKC7@4890,3RSEY@4891,3RXWV@4893,COG0326@1,KOG0019@2759	NA|NA|NA	O
g|tr|g336436.t1	Foraminifera	492	1	GloG15_CONTIG83702:419-518,582-1134,1204-1576(-)		transferase activity, transferring glycosyl groups	5.98831e+06	4.01207e+06	1.39347e+06	2.24273e+06	6.40751e+06	6.40283e+06	2.98341e+06	4.38729e+06	5.2324e+06	6.09384e+06	1.67815e+06	387383	4.16805e+06	2.64951e+06	5.51329e+06	6.34763e+06	>g|tr|g336436.t1	227086.JGI_V11_85652	1.8e-70	273.1	Eukaryota	GO:0000323,GO:0003674,GO:0003824,GO:0004175,GO:0004197,GO:0005575,GO:0005576,GO:0005615,GO:0005622,GO:0005623,GO:0005737,GO:0005764,GO:0005773,GO:0006508,GO:0006807,GO:0007275,GO:0008150,GO:0008152,GO:0008233,GO:0008234,GO:0009056,GO:0009057,GO:0009653,GO:0009888,GO:0009987,GO:0010015,GO:0010053,GO:0010054,GO:0016020,GO:0016049,GO:0016787,GO:0019538,GO:0021700,GO:0022622,GO:0030154,GO:0030163,GO:…	3.4.22.15,3.4.22.38	ko:K01365,ko:K01371,ko:K16290	ko04140,ko04142,ko04145,ko04210,ko04380,ko04612,ko04620,ko05205,ko05323,ko05418,map04140,map04142,map04145,map04210,map04380,map04612,map04620,map05205,map05323,map05418				ko00000,ko00001,ko00537,ko01000,ko01002,ko03110				Eukaryota	COG4870@1,KOG1543@2759	NA|NA|NA	O
g|tr|g337050.t1	Foraminifera	439	8	GloG15_CONTIG84063:822-1254,1326-1469,1525-2048(+)		Malate dehydrogenase	208681	576775	528869	490535	627678	824454	1.5227e+06	630188	442230	807434	476653	393065	1.36161e+06	555749	488499	647464	>g|tr|g337050.t1	44689.DDB0230186	3.2e-94	352.1	Amoebozoa	GO:0003674,GO:0003824,GO:0005575,GO:0005622,GO:0005623,GO:0005737,GO:0006082,GO:0006091,GO:0006099,GO:0006101,GO:0006107,GO:0006108,GO:0006139,GO:0006725,GO:0006732,GO:0006733,GO:0006734,GO:0006753,GO:0006793,GO:0006796,GO:0006807,GO:0008150,GO:0008152,GO:0009060,GO:0009117,GO:0009987,GO:0015980,GO:0016491,GO:0016614,GO:0016615,GO:0016616,GO:0016999,GO:0017144,GO:0019362,GO:0019637,GO:0019674,GO:…	1.1.1.37	ko:K00024,ko:K00025	ko00020,ko00270,ko00620,ko00630,ko00680,ko00710,ko00720,ko01100,ko01110,ko01120,ko01130,ko01200,ko04964,map00020,map00270,map00620,map00630,map00680,map00710,map00720,map01100,map01110,map01120,map01130,map01200,map04964	M00009,M00011,M00012,M00168,M00171,M00173,M00346,M00374,M00620,M00740	R00342,R07136	RC00031	ko00000,ko00001,ko00002,ko01000				Eukaryota	3X8EH@554915,COG0039@1,KOG1496@2759	NA|NA|NA	C
g|tr|g342809.t1	Foraminifera	1069	1	GloG15_CONTIG87417:83-237,305-439,509-643(-)	SDH2	3 iron, 4 sulfur cluster binding	1.31012e+06	2.04835e+06	741363	1.54385e+06	2.1474e+06	2.42896e+06	3.22738e+06	851181	1.00492e+06	1.13866e+06	1.46953e+06	857188	2.10902e+06	1.14887e+06	1.44408e+06	1.58766e+06	>g|tr|g342809.t1	81824.XP_001747850.1	8.4e-43	179.9	Opisthokonta	GO:0000104,GO:0003674,GO:0003824,GO:0005488,GO:0005575,GO:0005622,GO:0005623,GO:0005737,GO:0005739,GO:0005740,GO:0005743,GO:0005746,GO:0005749,GO:0006082,GO:0006091,GO:0006099,GO:0006101,GO:0006105,GO:0006119,GO:0006121,GO:0006139,GO:0006163,GO:0006725,GO:0006753,GO:0006793,GO:0006796,GO:0006807,GO:0008150,GO:0008152,GO:0008177,GO:0009060,GO:0009117,GO:0009123,GO:0009126,GO:0009141,GO:0009144,GO:…	1.3.5.1	ko:K00235	ko00020,ko00190,ko01100,ko01110,ko01120,ko01130,ko01200,ko04714,ko04932,ko05010,ko05012,ko05016,map00020,map00190,map01100,map01110,map01120,map01130,map01200,map04714,map04932,map05010,map05012,map05016	M00009,M00011,M00148	R02164	RC00045	ko00000,ko00001,ko00002,ko01000				Opisthokonta	38CDD@33154,COG0479@1,KOG3049@2759	NA|NA|NA	C
g|tr|g344302.t1	Foraminifera	180	11	GloG15_CONTIG88297:716-2347(-)		Clathrin is the major protein of the polyhedral coat of coated pits and vesicles	662254	1.07465e+06	540475	888248	920315	808097	1.08726e+06	1.01174e+06	969959	1.09595e+06	841495	1.14674e+06	1.13668e+06	981061	628158	1.04677e+06	>g|tr|g344302.t1	248742.XP_005651179.1	7.8e-145	520.8	Chlorophyta			ko:K04646	ko04142,ko04144,ko04721,ko04961,ko05016,ko05100,map04142,map04144,map04721,map04961,map05016,map05100				ko00000,ko00001,ko04131,ko04147				Viridiplantae	34GPH@3041,37KUU@33090,KOG0985@1,KOG0985@2759	NA|NA|NA	U
g|tr|g344496.t1	Foraminifera	200	1	GloG15_CONTIG88414:1-82,254-658,717-995,1063-1073,1133-1150,1212-1323,1379-1563,1626-1695,1750-1990,2051-2225(-)	GLB1L	beta-galactosidase activity	715149	272851	452833	213469	611613	454444	376657	528654	419380	465604	315924	438663	330283	349175	465494	424470	>g|tr|g344496.t1	164328.Phyra96749	8.2e-99	367.9	Peronosporales	GO:0000323,GO:0001775,GO:0002252,GO:0002263,GO:0002274,GO:0002275,GO:0002283,GO:0002366,GO:0002376,GO:0002443,GO:0002444,GO:0002446,GO:0003674,GO:0003824,GO:0004308,GO:0004553,GO:0004565,GO:0005488,GO:0005515,GO:0005575,GO:0005576,GO:0005615,GO:0005622,GO:0005623,GO:0005737,GO:0005764,GO:0005766,GO:0005773,GO:0005775,GO:0005794,GO:0005975,GO:0005996,GO:0006012,GO:0006022,GO:0006026,GO:0006027,GO:…	2.1.3.2,3.2.1.23,3.5.2.3,6.3.5.5	ko:K01190,ko:K11540,ko:K12308,ko:K12309,ko:K14297,ko:K22390	ko00052,ko00240,ko00250,ko00511,ko00531,ko00600,ko00604,ko01100,ko03013,ko04142,ko05164,map00052,map00240,map00250,map00511,map00531,map00600,map00604,map01100,map03013,map04142,map05164	M00051,M00079,M00427	R00256,R00575,R01105,R01395,R01397,R01678,R01993,R03355,R04633,R04783,R06010,R06114,R07807,R10948,R10949	RC00002,RC00010,RC00043,RC00049,RC00064,RC00452,RC00632,RC02750,RC02798,RC02850,RC03314	ko00000,ko00001,ko00002,ko01000,ko01002,ko03019,ko03036,ko04147	1.I.1			Eukaryota	3Q8TS@4776,COG1874@1,KOG0496@2759	NA|NA|NA	G
g|tr|g345399.t1	Foraminifera	220	7	GloG15_CONTIG88927:137-1663(+)	prpD	2-methylcitrate dehydratase activity	359017	374223	233451	336113	324957	659781	509377	357445	313788	332647	164550	133688	417075	309811	475526	389397	>g|tr|g345399.t1	661478.OP10G_1650	7.3e-145	520.8	Bacteria	GO:0003674,GO:0003824,GO:0005575,GO:0005618,GO:0005622,GO:0005623,GO:0005737,GO:0005829,GO:0006082,GO:0006629,GO:0006631,GO:0008150,GO:0008152,GO:0009056,GO:0009062,GO:0009268,GO:0009628,GO:0009987,GO:0010447,GO:0016042,GO:0016054,GO:0016829,GO:0016835,GO:0016836,GO:0016999,GO:0017001,GO:0017144,GO:0019541,GO:0019543,GO:0019626,GO:0019629,GO:0019679,GO:0019752,GO:0030312,GO:0032787,GO:0042737,GO:…	4.2.1.79	ko:K01720	ko00640,map00640		R04424	RC01152	ko00000,ko00001,ko01000				Bacteria	COG2079@1,COG2079@2	NA|NA|NA	S
g|tr|g345538.t1	Foraminifera	424	9	GloG15_CONTIG89008:1324-2441(+)	TPD3	HEAT repeats	971286	761141	721050	776371	652264	860239	912013	925979	841269	735726	906010	883492	733347	685046	785390	800331	>g|tr|g345538.t1	13684.SNOT_11782	1.4e-36	160.6	Pleosporales	GO:0000075,GO:0000159,GO:0000278,GO:0000910,GO:0003674,GO:0005575,GO:0005622,GO:0005623,GO:0005634,GO:0005737,GO:0005815,GO:0005816,GO:0005826,GO:0005856,GO:0005933,GO:0005934,GO:0005935,GO:0005937,GO:0005938,GO:0006417,GO:0006996,GO:0007010,GO:0007049,GO:0007088,GO:0007093,GO:0007094,GO:0007096,GO:0007163,GO:0007346,GO:0008104,GO:0008150,GO:0008287,GO:0009889,GO:0009966,GO:0009968,GO:0009987,GO:…		ko:K03456	ko03015,ko04071,ko04111,ko04113,ko04114,ko04151,ko04152,ko04261,ko04350,ko04390,ko04391,ko04530,ko04728,ko04730,ko05142,ko05160,ko05165,map03015,map04071,map04111,map04113,map04114,map04151,map04152,map04261,map04350,map04390,map04391,map04530,map04728,map04730,map05142,map05160,map05165				ko00000,ko00001,ko01009,ko03036				Fungi	1ZXX6@147541,38DRM@33154,3NU14@4751,3QKFE@4890,4KERK@92860,KOG0211@1,KOG0211@2759	NA|NA|NA	T
g|tr|g346126.t1	Foraminifera	109	18	GloG15_CONTIG89336:1-278,358-648,813-1668,1720-2264(+)	ACSS1	synthetase	1.31248e+06	1.19917e+06	799556	1.04322e+06	1.26034e+06	1.27939e+06	973808	1.91663e+06	1.80073e+06	1.40878e+06	1.00166e+06	489441	1.34664e+06	1.31441e+06	1.50009e+06	1.45803e+06	>g|tr|g346126.t1	227086.JGI_V11_55817	4.4e-227	794.3	Eukaryota	GO:0000166,GO:0001302,GO:0003674,GO:0003824,GO:0003987,GO:0005488,GO:0005575,GO:0005576,GO:0005622,GO:0005623,GO:0005634,GO:0005730,GO:0005737,GO:0005739,GO:0005759,GO:0005829,GO:0006066,GO:0006067,GO:0006069,GO:0006082,GO:0006083,GO:0006084,GO:0006085,GO:0006091,GO:0006113,GO:0006139,GO:0006163,GO:0006164,GO:0006325,GO:0006464,GO:0006473,GO:0006475,GO:0006629,GO:0006631,GO:0006633,GO:0006637,GO:…	6.2.1.1	ko:K01895	ko00010,ko00620,ko00640,ko00680,ko00720,ko01100,ko01110,ko01120,ko01130,ko01200,map00010,map00620,map00640,map00680,map00720,map01100,map01110,map01120,map01130,map01200	M00357	R00235,R00236,R00316,R00926,R01354	RC00004,RC00012,RC00043,RC00070,RC02746,RC02816	ko00000,ko00001,ko00002,ko01000,ko01004				Eukaryota	COG0365@1,KOG1175@2759	NA|NA|NA	I
g|tr|g346842.t1	Foraminifera	59	4	GloG15_CONTIG89763:1-2411(-)		dynein light chain binding	63089.5	181270	176612	168265	157763	176746	136299	140432	83967.2	198680	159609	283852	229462	134460	101263	90512.7	>g|tr|g346842.t1	227086.JGI_V11_52380	4e-222	778.1	Eukaryota	GO:0000003,GO:0000070,GO:0000166,GO:0000235,GO:0000278,GO:0000280,GO:0000741,GO:0000742,GO:0000746,GO:0000747,GO:0000819,GO:0003674,GO:0003774,GO:0003777,GO:0003824,GO:0005488,GO:0005515,GO:0005524,GO:0005575,GO:0005622,GO:0005623,GO:0005737,GO:0005815,GO:0005816,GO:0005818,GO:0005819,GO:0005856,GO:0005868,GO:0005874,GO:0005875,GO:0005876,GO:0005881,GO:0005938,GO:0006810,GO:0006928,GO:0006996,GO:…		ko:K10413	ko04145,ko04962,ko05132,map04145,map04962,map05132				ko00000,ko00001,ko03036,ko04147,ko04812				Eukaryota	COG5245@1,KOG3595@2759	NA|NA|NA	Z
g|tr|g347497.t1	Foraminifera	795	2	GloG15_CONTIG90173:523-915,972-1268(-)		Glutathione S-transferase, C-terminal domain	4.25431e+06	2.4453e+06	608003	1.79696e+06	2.58618e+06	2.33107e+06	1.78632e+06	2.99526e+06	4.66691e+06	2.70937e+06	2.79944e+06	2.42295e+06	2.11176e+06	3.68238e+06	3.62082e+06	3.22094e+06	>g|tr|g347497.t1	32264.tetur03g09230.1	7.3e-28	131.0	Arthropoda		2.5.1.18	ko:K00799	ko00480,ko00980,ko00982,ko00983,ko01524,ko05200,ko05204,ko05225,ko05418,map00480,map00980,map00982,map00983,map01524,map05200,map05204,map05225,map05418		R03522,R07002,R07003,R07004,R07023,R07024,R07025,R07026,R07069,R07070,R07083,R07084,R07091,R07092,R07093,R07094,R07100,R07113,R07116,R08280,R09409,R11905	RC00004,RC00069,RC00840,RC00948,RC01704,RC01705,RC01706,RC01758,RC01759,RC01765,RC01767,RC01769,RC02243,RC02527,RC02939,RC02940,RC02942,RC02943,RC02944	ko00000,ko00001,ko01000,ko02000	1.A.12.2.2,1.A.12.3.2			Arthropoda	38YPE@33154,3BFCR@33208,3CZP0@33213,422DP@6656,KOG1695@1,KOG1695@2759	NA|NA|NA	O
g|tr|g347829.t1	Foraminifera	147	2	GloG15_CONTIG90368:478-2244(-)	GNS	N-acetylglucosamine-6-sulfatase activity	1.2437e+06	821166	1.53639e+06	998056	781957	1.24898e+06	751432	1.57688e+06	619339	796001	463097	950353	608773	704105	1.36785e+06	1.01985e+06	>g|tr|g347829.t1	45351.EDO49809	6.5e-97	361.7	Metazoa	GO:0000323,GO:0001775,GO:0002252,GO:0002263,GO:0002274,GO:0002275,GO:0002283,GO:0002366,GO:0002376,GO:0002443,GO:0002444,GO:0002446,GO:0003674,GO:0003824,GO:0005488,GO:0005539,GO:0005575,GO:0005576,GO:0005622,GO:0005623,GO:0005737,GO:0005764,GO:0005766,GO:0005773,GO:0005775,GO:0006022,GO:0006026,GO:0006027,GO:0006082,GO:0006790,GO:0006807,GO:0006810,GO:0006887,GO:0006955,GO:0008150,GO:0008152,GO:…	3.1.6.14	ko:K01137	ko00531,ko01100,ko04142,map00531,map01100,map04142	M00078,M00079	R07808,R07819		ko00000,ko00001,ko00002,ko01000				Metazoa	38E91@33154,3BCUU@33208,COG3119@1,KOG3731@2759	NA|NA|NA	G
g|tr|g347920.t1	Foraminifera	558	11	GloG15_CONTIG90422:286-372,504-1359(+)		prohibitin homologues	517873	929864	828503	815913	654334	422529	492526	840559	966914	690184	531647	1.49723e+06	747622	602045	451737	435233	>g|tr|g347920.t1	272952.HpaP804666	1.7e-19	103.6	Peronosporales												Eukaryota	2CP2U@1,2QZM8@2759,3QABV@4776	NA|NA|NA	S
g|tr|g349128.t1	Foraminifera	1041	3	GloG15_CONTIG91129:1688-2140(-)		60s ribosomal protein	1.24568e+06	3.11125e+06	1.97252e+06	2.61665e+06	2.48205e+06	3.37907e+06	3.60947e+06	2.08428e+06	994302	1.96174e+06	943782	719059	2.00002e+06	1.39804e+06	1.71585e+06	1.7848e+06	>g|tr|g349128.t1	3649.evm.model.supercontig_27.99	6.9e-35	153.7	Brassicales			ko:K02940	ko03010,map03010	M00177			br01610,ko00000,ko00001,ko00002,ko03011				Viridiplantae	37IY1@33090,3GBVA@35493,3HNCE@3699,COG0097@1,KOG3255@2759	NA|NA|NA	J
g|tr|g350776.t1	Foraminifera	161	2	GloG15_CONTIG92116:1-459,703-1934(-)	IleS	Belongs to the class-I aminoacyl-tRNA synthetase family	490984	996629	624786	968961	889842	860322	1.11614e+06	812248	829285	1.08821e+06	448562	594750	998287	789663	537660	764749	>g|tr|g350776.t1	3702.AT4G10320.1	4.6e-148	531.6	Brassicales	GO:0003674,GO:0003824,GO:0004812,GO:0004822,GO:0005488,GO:0005515,GO:0005575,GO:0005622,GO:0005623,GO:0005737,GO:0005829,GO:0006082,GO:0006139,GO:0006399,GO:0006412,GO:0006418,GO:0006428,GO:0006518,GO:0006520,GO:0006725,GO:0006807,GO:0008150,GO:0008152,GO:0009058,GO:0009059,GO:0009987,GO:0010035,GO:0010038,GO:0010467,GO:0016070,GO:0016874,GO:0016875,GO:0017101,GO:0019538,GO:0019752,GO:0019899,GO:…	6.1.1.5	ko:K01870	ko00970,map00970	M00359,M00360	R03656	RC00055,RC00523	ko00000,ko00001,ko00002,ko01000,ko01007,ko03016			iRC1080.CRv4_Au5_s16_g6096_t1	Viridiplantae	37HS0@33090,3G889@35493,3HQ32@3699,COG0060@1,KOG0434@2759	NA|NA|NA	J
g|tr|g352560.t1	Foraminifera	775	2	GloG15_CONTIG93205:1666-2374(+)		Microtubule binding	325626	171328	295633	203147	290592	349277	250214	301899	299038	309649	250672	354444	269672	296447	226521	378747	>g|tr|g352560.t1	121225.PHUM434560-PA	7.5e-20	104.4	Paraneoptera	GO:0000003,GO:0000226,GO:0000278,GO:0000280,GO:0000922,GO:0001578,GO:0002790,GO:0003674,GO:0003774,GO:0003777,GO:0003824,GO:0005488,GO:0005515,GO:0005575,GO:0005622,GO:0005623,GO:0005634,GO:0005737,GO:0005783,GO:0005794,GO:0005818,GO:0005819,GO:0005856,GO:0005871,GO:0005874,GO:0005875,GO:0005876,GO:0006810,GO:0006928,GO:0006996,GO:0007010,GO:0007017,GO:0007018,GO:0007030,GO:0007049,GO:0007051,GO:…		ko:K10398					ko00000,ko03036,ko04812				Arthropoda	39J7K@33154,3BFQS@33208,3CRYP@33213,3ECKV@33342,3SHSM@50557,41TRP@6656,COG5059@1,KOG0243@2759	NA|NA|NA	Z
g|tr|g353352.t1	Foraminifera	198	1	GloG15_CONTIG93675:393-882,949-2048(+)	hslU	this subunit has chaperone activity. The binding of ATP and its subsequent hydrolysis by HslU are essential for unfolding of protein substrates subsequently hydrolyzed by HslV. HslU recognizes the N-terminal part of its protein substrates and unfolds these before they are guided to HslV for hydrolysis	22.7195	295318	8551.6	182407	276644	76375.7	229530	56202.9	116525	366332	297830	37633.6	478426	50012	66062.8	51696.3	>g|tr|g353352.t1	1185652.USDA257_c59210	8.5e-112	411.0	Rhizobiaceae	GO:0000166,GO:0000287,GO:0000502,GO:0003674,GO:0003824,GO:0005488,GO:0005515,GO:0005524,GO:0005575,GO:0005622,GO:0005623,GO:0005737,GO:0005829,GO:0006508,GO:0006807,GO:0006950,GO:0008144,GO:0008150,GO:0008152,GO:0008233,GO:0009266,GO:0009376,GO:0009408,GO:0009628,GO:0009987,GO:0016043,GO:0016462,GO:0016787,GO:0016817,GO:0016818,GO:0016887,GO:0017076,GO:0017111,GO:0019538,GO:0019904,GO:0022607,GO:…		ko:K03667					ko00000,ko03110				Bacteria	1MVK9@1224,2TRXC@28211,4B7G7@82115,COG1220@1,COG1220@2	NA|NA|NA	O
g|tr|g353392.t1	Foraminifera	412	4	GloG15_CONTIG93700:1029-1639,1715-2243(-)		transferase activity, transferring glycosyl groups	5.86492e+06	3.95391e+06	818209	2.51968e+06	4.19832e+06	3.71816e+06	2.52815e+06	5.30364e+06	4.79971e+06	3.83928e+06	596155	323252	3.42616e+06	1.9853e+06	4.14819e+06	4.97281e+06	>g|tr|g353392.t1	227086.JGI_V11_56334	6.1e-72	278.1	Eukaryota	GO:0000323,GO:0003674,GO:0003824,GO:0004175,GO:0004197,GO:0005575,GO:0005576,GO:0005615,GO:0005622,GO:0005623,GO:0005737,GO:0005764,GO:0005773,GO:0006508,GO:0006807,GO:0007275,GO:0008150,GO:0008152,GO:0008233,GO:0008234,GO:0009056,GO:0009057,GO:0009653,GO:0009888,GO:0009987,GO:0010015,GO:0010053,GO:0010054,GO:0016020,GO:0016049,GO:0016787,GO:0019538,GO:0021700,GO:0022622,GO:0030154,GO:0030163,GO:…	3.4.22.15,3.4.22.38	ko:K01365,ko:K01371,ko:K16290	ko04140,ko04142,ko04145,ko04210,ko04380,ko04612,ko04620,ko05205,ko05323,ko05418,map04140,map04142,map04145,map04210,map04380,map04612,map04620,map05205,map05323,map05418				ko00000,ko00001,ko00537,ko01000,ko01002,ko03110				Eukaryota	COG4870@1,KOG1543@2759	NA|NA|NA	O
g|tr|g353634.t1-g|tr|g1132287.t1(76.40%)	Foraminifera	739	43	GloG15_CONTIG93842:1548-2060,2123-2356(+)		protein domain specific binding	5.5021e+06	4.47179e+06	3.4725e+06	4.13561e+06	3.7309e+06	4.43688e+06	4.53208e+06	5.21184e+06	5.76979e+06	4.17408e+06	3.98032e+06	4.64157e+06	4.25279e+06	4.92067e+06	5.64752e+06	5.36723e+06	>g|tr|g353634.t1	227086.JGI_V11_92828	1.4e-64	253.1	Eukaryota	GO:0005575,GO:0005622,GO:0005623,GO:0005737,GO:0031410,GO:0031982,GO:0042470,GO:0043226,GO:0043227,GO:0043229,GO:0044424,GO:0044444,GO:0044464,GO:0048770,GO:0097708		ko:K06630,ko:K16197	ko04011,ko04013,ko04110,ko04114,ko04151,ko04212,ko04390,ko04391,ko04722,ko05161,ko05169,ko05203,map04011,map04013,map04110,map04114,map04151,map04212,map04390,map04391,map04722,map05161,map05169,map05203				ko00000,ko00001,ko03400,ko04147				Eukaryota	COG5040@1,KOG0841@2759	NA|NA|NA	T
g|tr|g353692.t1	Foraminifera	187	1	GloG15_CONTIG93876:388-2001(-)		oxidoreductase activity, acting on the aldehyde or oxo group of donors, NAD or NADP as acceptor	290878	270818	264911	346772	120630	259399	103534	276475	264829	244260	338372	81240	153757	420750	288105	441019	>g|tr|g353692.t1	2903.EOD18040	9e-162	577.0	Eukaryota		1.2.1.3,2.1.3.15,6.4.1.3	ko:K00128,ko:K01966	ko00010,ko00053,ko00071,ko00280,ko00310,ko00330,ko00340,ko00380,ko00410,ko00561,ko00620,ko00625,ko00630,ko00640,ko00903,ko00981,ko01100,ko01110,ko01120,ko01130,ko01200,map00010,map00053,map00071,map00280,map00310,map00330,map00340,map00380,map00410,map00561,map00620,map00625,map00630,map00640,map00903,map00981,map01100,map01110,map01120,map01130,map01200	M00135,M00373,M00741	R00264,R00631,R00710,R00904,R01752,R01859,R01986,R02549,R02678,R02940,R02957,R03283,R03869,R04065,R04506,R04903,R05050,R05237,R05238,R05286,R06366,R08146	RC00047,RC00071,RC00080,RC00097,RC00186,RC00218,RC00242,RC00609,RC00816,RC01500	ko00000,ko00001,ko00002,ko01000				Eukaryota	COG1012@1,KOG2456@2759	NA|NA|NA	C
g|tr|g354115.t1	Foraminifera	372	4	GloG15_CONTIG94127:721-1173,1227-1985(+)		negative regulation of mitochondrial membrane permeability involved in apoptotic process	153796	706793	330315	658412	487877	575211	830260	399456	382682	918514	444698	126514	1.12748e+06	459201	291245	638651	>g|tr|g354115.t1	5762.XP_002670100.1	9.9e-121	440.3	Eukaryota		2.3.1.16	ko:K07508	ko00062,ko00071,ko00280,ko01100,ko01110,ko01130,ko01212,map00062,map00071,map00280,map01100,map01110,map01130,map01212	M00085,M00087	R00391,R00927,R01177,R03778,R03858,R03991,R04546,R04742,R04747	RC00004,RC00326,RC00405,RC01702	ko00000,ko00001,ko00002,ko01000				Eukaryota	COG0183@1,KOG1391@2759	NA|NA|NA	I
g|tr|g355252.t1	Foraminifera	373	1	GloG15_CONTIG94808:48-647,722-1333(+)		3',5'-cyclic-nucleotide phosphodiesterase activity	152001	161152	72581	72140.2	181208	163111	157935	245817	527430	168919	199223	103065	260220	131890	127828	155356	>g|tr|g355252.t1	112098.XP_008613245.1	8.6e-48	198.0	Eukaryota		3.1.4.53	ko:K13294	ko00230,map00230		R00191	RC00296	ko00000,ko00001,ko01000				Eukaryota	KOG3689@1,KOG3689@2759	NA|NA|NA	T
g|tr|g355320.t1	Foraminifera	421	2	GloG15_CONTIG94850:1059-1612,1680-1863,1960-2349(+)		Phosphotransferase enzyme family	53469.6	47070.3	71780.5	64718.3	39569.3	30638.7	57391.2	49354.1	62512.3	91525.4	50256.9	212654	71144.2	6133.37	31867.2	40876.3	>g|tr|g355320.t1	242159.ABO96984	1.4e-52	213.8	Chlorophyta	GO:0000096,GO:0000097,GO:0000302,GO:0003674,GO:0003824,GO:0005488,GO:0005515,GO:0005575,GO:0005622,GO:0005623,GO:0005737,GO:0005829,GO:0006082,GO:0006520,GO:0006555,GO:0006790,GO:0006793,GO:0006796,GO:0006807,GO:0006950,GO:0006979,GO:0008150,GO:0008152,GO:0008652,GO:0009058,GO:0009066,GO:0009067,GO:0009086,GO:0009719,GO:0009723,GO:0009725,GO:0009987,GO:0010033,GO:0010035,GO:0010038,GO:0010039,GO:…	2.7.1.100	ko:K00899	ko00270,ko01100,map00270,map01100	M00034	R04143	RC00002,RC00078	ko00000,ko00001,ko00002,ko01000			iRC1080.CRv4_Au5_s16_g6522_t1	Viridiplantae	2QVM3@2759,34PAM@3041,37IGS@33090,COG4857@1	NA|NA|NA	E
g|tr|g356185.t1	Foraminifera	474	1	GloG15_CONTIG95379:1036-1552,1759-2289(+)	CBS	Cysteine synthase	87677	150092	54322.3	124296	143499	155168	152856	158571	118765	93389.3	57023.5	8635.36	70474	177187	8912.81	101213	>g|tr|g356185.t1	44689.DDB0191292	3.5e-122	444.9	Amoebozoa	GO:0000003,GO:0000096,GO:0000097,GO:0000098,GO:0001101,GO:0001501,GO:0001503,GO:0001666,GO:0001932,GO:0001958,GO:0001974,GO:0003008,GO:0003013,GO:0003018,GO:0003674,GO:0003676,GO:0003723,GO:0003729,GO:0003824,GO:0004122,GO:0005488,GO:0005515,GO:0005575,GO:0005622,GO:0005623,GO:0005634,GO:0005737,GO:0005739,GO:0005829,GO:0006082,GO:0006139,GO:0006259,GO:0006520,GO:0006534,GO:0006535,GO:0006563,GO:…	2.3.1.225,4.2.1.22	ko:K01697,ko:K20032	ko00260,ko00270,ko01100,ko01130,ko01230,map00260,map00270,map01100,map01130,map01230	M00035,M00338	R00891,R01290,R04942	RC00056,RC00069,RC00256,RC00489,RC01246	ko00000,ko00001,ko00002,ko01000,ko04131	9.B.37.1,9.B.37.3			Eukaryota	3X8M6@554915,COG0031@1,KOG1252@2759	NA|NA|NA	E
g|tr|g357733.t1	Foraminifera	1133	1	GloG15_CONTIG96318:10-108,161-341(-)		GTP binding	16.848	64.3477	57730.1	9782.15	33859.8	12788.6	28206.2	10701.9	16.3508	2792.82	572008	255560	13716.6	131217	7731.61	15298.7	>g|tr|g357733.t1	227086.JGI_V11_47763	4.6e-29	133.7	Eukaryota			ko:K07208,ko:K07827	ko01521,ko01522,ko04010,ko04012,ko04013,ko04014,ko04015,ko04062,ko04068,ko04071,ko04072,ko04137,ko04138,ko04140,ko04150,ko04151,ko04152,ko04210,ko04211,ko04213,ko04214,ko04218,ko04320,ko04360,ko04370,ko04371,ko04540,ko04550,ko04650,ko04660,ko04662,ko04664,ko04714,ko04720,ko04722,ko04725,ko04726,ko04730,ko04810,ko04910,ko04912,ko04914,ko04915,ko04916,ko04917,ko04919,ko04921,ko04926,ko04933,ko04960…				ko00000,ko00001,ko04031,ko04131				Eukaryota	COG1100@1,KOG0395@2759	NA|NA|NA	S
g|tr|g358041.t1	Foraminifera	920	2	GloG15_CONTIG96510:1409-1990(+)		Part of a sulfur-relay system required for 2-thiolation of 5-methylaminomethyl-2-thiouridine (mnm(5)s(2)U) at tRNA wobble positions. Accepts sulfur from TusA and transfers it in turn to TusE	140564	115244	29170.8	71222.7	58341.7	51775	42493	171748	38127.8	147990	164448	177419	144385	154567	182192	208372	>g|tr|g358041.t1	698769.JFBD01000034_gene1412	2.7e-07	62.4	Bacteria			ko:K07235	ko04122,map04122				ko00000,ko00001,ko01000,ko03016				Bacteria	COG1553@1,COG1553@2	NA|NA|NA	P
g|tr|g358363.t1	Foraminifera	176	5	GloG15_CONTIG96713:48-178,251-324,380-395,459-548,601-881,932-1228,1298-1379,1437-1517,1579-2171(+)			2.47729e+06	1.30625e+06	1.23738e+06	1.33066e+06	1.6052e+06	1.16034e+06	942096	2.82218e+06	2.24146e+06	1.36382e+06	1.56893e+06	651267	1.34383e+06	1.94967e+06	1.60694e+06	1.33311e+06	>g|tr|g358363.t1	400682.PAC_15728530	1.9e-138	499.6	Opisthokonta												Opisthokonta	294VB@1,2RBSW@2759,39Y68@33154	NA|NA|NA
g|tr|g358391.t1	Foraminifera	104	3	GloG15_CONTIG96731:9-36,103-2077(-)		Glycosyl hydrolases family 38 C-terminal domain	479495	267931	223411	237837	326591	488569	496801	966777	510617	536410	109446	15498.4	612831	316674	432984	449808	>g|tr|g358391.t1	4081.Solyc02g083700.2.1	5.6e-20	106.3	asterids	GO:0000323,GO:0003674,GO:0003824,GO:0004553,GO:0004559,GO:0005575,GO:0005622,GO:0005623,GO:0005737,GO:0005764,GO:0005773,GO:0005975,GO:0005996,GO:0006013,GO:0006464,GO:0006517,GO:0006807,GO:0008150,GO:0008152,GO:0009100,GO:0009987,GO:0015923,GO:0016787,GO:0016798,GO:0019318,GO:0019538,GO:0036211,GO:0043170,GO:0043226,GO:0043227,GO:0043229,GO:0043231,GO:0043412,GO:0044237,GO:0044238,GO:0044260,GO:…	3.2.1.24	ko:K01191	ko00511,map00511				ko00000,ko00001,ko01000,ko04131		GH38		Viridiplantae	37JT3@33090,3G8X5@35493,44BQU@71274,KOG1959@1,KOG1959@2759	NA|NA|NA	G
g|tr|g358577.t1	Foraminifera	1119	4	GloG15_CONTIG96846:1-117,198-401(-)	mycbp		1.63426e+06	1.15026e+06	1.57687e+06	1.32242e+06	1.40288e+06	2.201e+06	1.94033e+06	1.23434e+06	1.38997e+06	1.36435e+06	1.12787e+06	1.311e+06	1.77371e+06	860547	1.40647e+06	1.55232e+06	>g|tr|g358577.t1	5888.CAK65862	6.5e-11	73.6	Ciliophora	GO:0005575,GO:0005622,GO:0005623,GO:0005634,GO:0043226,GO:0043227,GO:0043229,GO:0043231,GO:0044424,GO:0044464											Eukaryota	2CYZS@1,2S7GH@2759,3ZCAT@5878	NA|NA|NA
g|tr|g359289.t1	Foraminifera	460	1	GloG15_CONTIG97289:879-1478,1541-2008(+)	deoC	DeoC/LacD family aldolase	19105.7	27581.2	26773.8	12159.9	36783.9	51326.9	80684.5	47664.6	24208.3	48919.8	47334	38886.4	105469	15290.5	5171.74	73417.4	>g|tr|g359289.t1	1120980.JQKH01000065_gene1803	2.1e-58	233.0	Neisseriales	GO:0003674,GO:0003824,GO:0004139,GO:0005975,GO:0006139,GO:0006725,GO:0006753,GO:0006793,GO:0006796,GO:0006807,GO:0008150,GO:0008152,GO:0009056,GO:0009058,GO:0009117,GO:0009166,GO:0009262,GO:0009264,GO:0009987,GO:0016052,GO:0016829,GO:0016830,GO:0016832,GO:0018130,GO:0019438,GO:0019439,GO:0019637,GO:0034404,GO:0034641,GO:0034654,GO:0034655,GO:0044237,GO:0044238,GO:0044248,GO:0044249,GO:0044270,GO:…	4.1.2.4	ko:K01619	ko00030,map00030		R01066	RC00436,RC00437	ko00000,ko00001,ko01000			iSB619.SA_RS00835	Bacteria	1N8AG@1224,2KU1W@206351,2VTH7@28216,COG0274@1,COG0274@2	NA|NA|NA	F
g|tr|g359474.t1	Foraminifera	138	1	GloG15_CONTIG97400:1-1266,1333-1910(-)	Psa	Peptidase family M1 domain	43559.3	54422.6	18835.5	50392.9	46651.9	31349	26649.2	28156.3	50689.9	28609.7	36051.4	58619.8	34110.7	41101.2	25044	29618.4	>g|tr|g359474.t1	103372.F4WC23	4.3e-91	342.4	Hymenoptera	GO:0003674,GO:0003824,GO:0004177,GO:0005488,GO:0005575,GO:0005622,GO:0005623,GO:0005737,GO:0006508,GO:0006518,GO:0006807,GO:0008150,GO:0008152,GO:0008233,GO:0008235,GO:0008237,GO:0008238,GO:0008270,GO:0009056,GO:0009987,GO:0016787,GO:0019538,GO:0033218,GO:0034641,GO:0042277,GO:0043167,GO:0043169,GO:0043170,GO:0043171,GO:0043603,GO:0044237,GO:0044238,GO:0044248,GO:0044424,GO:0044464,GO:0046872,GO:…		ko:K08776					ko00000,ko01000,ko01002				Arthropoda	38CFG@33154,3BADC@33208,3CW5S@33213,3SGEA@50557,41WW7@6656,46H2Y@7399,COG0308@1,KOG1046@2759	NA|NA|NA	O
g|tr|g360903.t1	Foraminifera	831	2	GloG15_CONTIG98256:972-1409,1471-1683(+)	VPS28	protein transport to vacuole involved in ubiquitin-dependent protein catabolic process via the multivesicular body sorting pathway	401508	485876	71587.3	288702	423169	362264	378821	236412	341620	279832	183151	65450	326918	343099	331679	459385	>g|tr|g360903.t1	227086.JGI_V11_91523	4e-44	184.9	Eukaryota	GO:0000003,GO:0000813,GO:0001654,GO:0003006,GO:0003674,GO:0005488,GO:0005515,GO:0005575,GO:0005622,GO:0005623,GO:0005737,GO:0005768,GO:0005769,GO:0005794,GO:0005802,GO:0005829,GO:0005886,GO:0006508,GO:0006511,GO:0006605,GO:0006612,GO:0006623,GO:0006807,GO:0006810,GO:0006811,GO:0006820,GO:0006862,GO:0006886,GO:0006914,GO:0006996,GO:0007010,GO:0007032,GO:0007034,GO:0007275,GO:0007276,GO:0007281,GO:…	3.4.23.1	ko:K06002,ko:K12184	ko04144,ko04974,map04144,map04974	M00409			ko00000,ko00001,ko00002,ko01000,ko01002,ko04131,ko04147				Eukaryota	KOG3284@1,KOG3284@2759	NA|NA|NA	U
g|tr|g361808.t1	Foraminifera	635	6	GloG15_CONTIG98822:1361-1889,1972-2292(+)		Citrate synthase, C-terminal domain	792183	2.12615e+06	1.21218e+06	1.90791e+06	2.47886e+06	1.15905e+06	2.17157e+06	1.33683e+06	1.05824e+06	4.55057e+06	2.84699e+06	2.87272e+06	4.50555e+06	1.68548e+06	1.06827e+06	1.51868e+06	>g|tr|g361808.t1	44689.DDB0191110	3.3e-86	325.1	Amoebozoa	GO:0000003,GO:0003674,GO:0003824,GO:0004108,GO:0005575,GO:0005622,GO:0005623,GO:0005737,GO:0005777,GO:0005829,GO:0005975,GO:0006081,GO:0006082,GO:0006097,GO:0006810,GO:0006897,GO:0006907,GO:0006909,GO:0008150,GO:0008152,GO:0009653,GO:0009987,GO:0016192,GO:0016740,GO:0016746,GO:0019752,GO:0019954,GO:0030100,GO:0030587,GO:0031288,GO:0032502,GO:0032787,GO:0032879,GO:0036440,GO:0042579,GO:0043226,GO:…	2.3.3.1	ko:K01647	ko00020,ko00630,ko01100,ko01110,ko01120,ko01130,ko01200,ko01210,ko01230,map00020,map00630,map01100,map01110,map01120,map01130,map01200,map01210,map01230	M00009,M00010,M00012,M00740	R00351	RC00004,RC00067	br01601,ko00000,ko00001,ko00002,ko01000				Eukaryota	3XDZK@554915,COG0372@1,KOG2617@2759	NA|NA|NA	H
g|tr|g361852.t1	Foraminifera	579	22	GloG15_CONTIG98848:1199-1488,1563-1945,2036-2286(+)	SLC25A31	ATP:ADP antiporter activity	2.72484e+06	2.68831e+06	1.71516e+06	2.45686e+06	2.97246e+06	4.11369e+06	4.45291e+06	2.84623e+06	2.25073e+06	2.91737e+06	1.6255e+06	2.10288e+06	3.47153e+06	2.42042e+06	3.06997e+06	3.33785e+06	>g|tr|g361852.t1	6500.XP_005107474.1	4.3e-116	424.5	Bilateria	GO:0003674,GO:0005215,GO:0005575,GO:0005622,GO:0005623,GO:0005737,GO:0005739,GO:0005740,GO:0005743,GO:0005929,GO:0006810,GO:0006839,GO:0008150,GO:0016020,GO:0016021,GO:0019866,GO:0022857,GO:0031090,GO:0031224,GO:0031514,GO:0031966,GO:0031967,GO:0031975,GO:0042995,GO:0043226,GO:0043227,GO:0043229,GO:0043231,GO:0044422,GO:0044424,GO:0044425,GO:0044429,GO:0044444,GO:0044446,GO:0044464,GO:0051179,GO:…		ko:K05863	ko04020,ko04022,ko04217,ko04218,ko05012,ko05016,ko05166,map04020,map04022,map04217,map04218,map05012,map05016,map05166				ko00000,ko00001,ko02000,ko03029	2.A.29.1			Metazoa	38B82@33154,3B9K3@33208,3CTAF@33213,KOG0749@1,KOG0749@2759	NA|NA|NA	C
g|tr|g362247.t1-g|tr|g632771.t1(77.11%)	Foraminifera	127	4	GloG15_CONTIG321602:1-1103(+)	EML1	Echinoderm microtubule associated protein like	1.30174e+06	3.18492e+06	3.13634e+06	2.92983e+06	5.73699e+06	1.9272e+06	3.01864e+06	2.63785e+06	2.22474e+06	4.23331e+06	3.00238e+06	2.81463e+06	5.08308e+06	2.35008e+06	1.39601e+06	2.69474e+06	>g|tr|g362247.t1	6500.XP_005094714.1	1.9e-54	220.7	Bilateria	GO:0000226,GO:0000278,GO:0002244,GO:0002376,GO:0002520,GO:0003008,GO:0003674,GO:0005102,GO:0005488,GO:0005509,GO:0005515,GO:0005575,GO:0005622,GO:0005623,GO:0005737,GO:0005829,GO:0005856,GO:0005875,GO:0006996,GO:0007010,GO:0007017,GO:0007049,GO:0007051,GO:0007052,GO:0007275,GO:0007399,GO:0007405,GO:0007417,GO:0007420,GO:0007600,GO:0007601,GO:0007605,GO:0008017,GO:0008022,GO:0008092,GO:0008150,GO:…		ko:K15420,ko:K18595,ko:K18596	ko05200,ko05223,map05200,map05223				ko00000,ko00001,ko04812				Metazoa	38B67@33154,3BAU9@33208,3CRT7@33213,COG2319@1,KOG2106@2759	NA|NA|NA	K
g|tr|g362565.t1	Foraminifera	324	1	GloG15_CONTIG99260:746-1248,1332-1698,1867-2285(+)		cGMP-dependent protein kinase activity	6185.94	93360.9	30347.6	101108	66241.9	30614.7	70527.2	48178.2	34392.3	137748	0	0	153330	37874.5	19894.4	88836.6	>g|tr|g362565.t1	227086.JGI_V11_86684	2e-39	170.2	Eukaryota		2.7.11.12	ko:K07376,ko:K19477	ko04022,ko04270,ko04540,ko04611,ko04713,ko04714,ko04730,ko04740,ko04923,ko04924,ko04970,map04022,map04270,map04540,map04611,map04713,map04714,map04730,map04740,map04923,map04924,map04970	M00694			ko00000,ko00001,ko00002,ko01000,ko01001				Eukaryota	COG0664@1,KOG0614@2759	NA|NA|NA	T
g|tr|g362646.t1	Foraminifera	304	1	GloG15_CONTIG99314:909-2243(-)		Long chain acyl-CoA synthetase	25874.7	232653	125615	172556	193166	477800	616361	382706	2141.18	196603	0	3106.42	8333.79	112962	254751	435059	>g|tr|g362646.t1	70448.Q00UP7	3.6e-108	398.7	Viridiplantae	GO:0001676,GO:0003674,GO:0003824,GO:0004467,GO:0005575,GO:0005622,GO:0005623,GO:0005737,GO:0005783,GO:0006082,GO:0006629,GO:0006631,GO:0008150,GO:0008152,GO:0009058,GO:0009059,GO:0009987,GO:0010025,GO:0010143,GO:0010166,GO:0012505,GO:0015645,GO:0016405,GO:0016874,GO:0016877,GO:0016878,GO:0019752,GO:0031957,GO:0032787,GO:0043170,GO:0043226,GO:0043227,GO:0043229,GO:0043231,GO:0043436,GO:0044237,GO:…	6.2.1.3	ko:K01897,ko:K15013	ko00061,ko00071,ko01100,ko01212,ko02024,ko03320,ko04146,ko04216,ko04714,ko04920,map00061,map00071,map01100,map01212,map02024,map03320,map04146,map04216,map04714,map04920	M00086	R01280	RC00004,RC00014	ko00000,ko00001,ko00002,ko01000,ko01004,ko04147	4.C.1.1			Viridiplantae	37IYG@33090,COG1022@1,KOG1256@2759	NA|NA|NA	I
g|tr|g362912.t1	Foraminifera	507	7	GloG15_CONTIG99474:1208-1603,1667-2283(+)	cMDH	lactate/malate dehydrogenase, NAD binding domain	598996	804405	664230	769109	762659	1.28225e+06	1.48396e+06	609961	575878	749009	206481	143314	1.06979e+06	432926	733228	849299	>g|tr|g362912.t1	5932.XP_004035776.1	8.1e-84	317.4	Ciliophora	GO:0003674,GO:0003824,GO:0005575,GO:0005576,GO:0005622,GO:0005623,GO:0005634,GO:0005737,GO:0005773,GO:0005774,GO:0005829,GO:0005886,GO:0005911,GO:0006082,GO:0006091,GO:0006099,GO:0006101,GO:0006107,GO:0006108,GO:0006139,GO:0006725,GO:0006732,GO:0006733,GO:0006734,GO:0006753,GO:0006793,GO:0006796,GO:0006807,GO:0006950,GO:0006970,GO:0008150,GO:0008152,GO:0009060,GO:0009117,GO:0009506,GO:0009507,GO:…	1.1.1.37	ko:K00024,ko:K00025,ko:K00026	ko00020,ko00270,ko00620,ko00630,ko00680,ko00710,ko00720,ko01100,ko01110,ko01120,ko01130,ko01200,ko04964,map00020,map00270,map00620,map00630,map00680,map00710,map00720,map01100,map01110,map01120,map01130,map01200,map04964	M00009,M00011,M00012,M00168,M00171,M00173,M00346,M00374,M00620,M00740	R00342,R07136	RC00031	ko00000,ko00001,ko00002,ko01000				Eukaryota	3ZB62@5878,COG0039@1,KOG1496@2759	NA|NA|NA	C
g|tr|g363728.t1	Foraminifera	596	8	GloG15_CONTIG99969:1214-2122(+)	PSMC2	proteasome-activating ATPase activity	127284	413087	277365	380564	458795	320266	820467	391309	319866	469767	406909	537437	643310	378623	189742	282939	>g|tr|g363728.t1	130081.XP_005707039.1	2.8e-91	342.0	Eukaryota	GO:0000166,GO:0000502,GO:0000932,GO:0001775,GO:0002252,GO:0002263,GO:0002274,GO:0002275,GO:0002283,GO:0002366,GO:0002376,GO:0002443,GO:0002444,GO:0002446,GO:0003674,GO:0003824,GO:0004175,GO:0005488,GO:0005515,GO:0005524,GO:0005575,GO:0005576,GO:0005622,GO:0005623,GO:0005634,GO:0005654,GO:0005694,GO:0005700,GO:0005737,GO:0005829,GO:0005838,GO:0006355,GO:0006357,GO:0006464,GO:0006508,GO:0006511,GO:…		ko:K03061	ko03050,ko05169,map03050,map05169	M00341			ko00000,ko00001,ko00002,ko03051				Eukaryota	COG0554@1,KOG0729@2759	NA|NA|NA	O
g|tr|g364092.t1	Foraminifera	871	1	GloG15_CONTIG100195:1-623(+)	trxB	Belongs to the class-II pyridine nucleotide-disulfide oxidoreductase family	24925.6	30410	13292.2	31881.6	22118	36296.5	60758.2	23448.7	30444	25114	12630.1	2960.42	33859.6	25855.2	15742.8	45251.1	>g|tr|g364092.t1	518766.Rmar_0181	2.2e-71	275.4	Bacteroidetes Order II. Incertae sedis	GO:0000166,GO:0001666,GO:0003674,GO:0003824,GO:0004791,GO:0005488,GO:0005575,GO:0005622,GO:0005623,GO:0005737,GO:0005829,GO:0006950,GO:0008150,GO:0008152,GO:0009628,GO:0009636,GO:0009987,GO:0015035,GO:0015036,GO:0016209,GO:0016491,GO:0016651,GO:0016667,GO:0016668,GO:0019725,GO:0036094,GO:0036293,GO:0040007,GO:0042221,GO:0042592,GO:0043167,GO:0043168,GO:0044424,GO:0044444,GO:0044464,GO:0045454,GO:…	1.8.1.9	ko:K00384,ko:K03671	ko00450,ko04621,ko05418,map00450,map04621,map05418		R02016,R03596,R09372	RC00013,RC02518,RC02873	ko00000,ko00001,ko01000,ko03110			iNJ661.Rv3913	Bacteria	1FIUF@1100069,4NEVX@976,COG0492@1,COG0492@2	NA|NA|NA	C
g|tr|g365032.t1	Foraminifera	667	1	GloG15_CONTIG100776:584-1393(+)		mitochondrial transport	127009	145636	59905.4	91917.3	127776	113009	75178.4	114331	173399	94570.7	144602	206757	145877	200147	129405	188691	>g|tr|g365032.t1	81824.XP_001745291.1	3.5e-53	215.3	Eukaryota			ko:K15109	ko04714,map04714				ko00000,ko00001,ko02000	2.A.29.8			Eukaryota	KOG0758@1,KOG0758@2759	NA|NA|NA	U
g|tr|g365624.t1	Foraminifera	360	3	GloG15_CONTIG101157:648-1871(+)	Vha44	Subunit of the peripheral V1 complex of vacuolar ATPase. Subunit C is necessary for the assembly of the catalytic sector of the enzyme and is likely to have a specific function in its catalytic activity. V-ATPase is responsible for acidifying a variety of intracellular compartments in eukaryotic cells	433511	261100	321544	252877	226498	226753	225260	310890	338871	273534	157826	205508	256835	199108	238475	293775	>g|tr|g365624.t1	136037.KDR10550	7.8e-41	174.9	Insecta	GO:0000221,GO:0000323,GO:0003674,GO:0003824,GO:0005215,GO:0005575,GO:0005622,GO:0005623,GO:0005737,GO:0005764,GO:0005765,GO:0005773,GO:0005774,GO:0005886,GO:0006810,GO:0006811,GO:0006812,GO:0008150,GO:0008324,GO:0008553,GO:0015075,GO:0015077,GO:0015078,GO:0015318,GO:0015399,GO:0015405,GO:0015662,GO:0015672,GO:0015988,GO:0015991,GO:0016020,GO:0016462,GO:0016469,GO:0016471,GO:0016787,GO:0016817,GO:…		ko:K02148	ko00190,ko01100,ko04145,ko04150,ko04721,ko04966,ko05110,ko05120,ko05323,map00190,map01100,map04145,map04150,map04721,map04966,map05110,map05120,map05323	M00160			ko00000,ko00001,ko00002	3.A.2.2			Arthropoda	38C54@33154,3BBW4@33208,3CTY9@33213,3SGYT@50557,41US1@6656,COG5127@1,KOG2909@2759	NA|NA|NA	C
g|tr|g366048.t1	Foraminifera	623	1	GloG15_CONTIG101435:291-1160(+)		Allows the formation of correctly charged Gln-tRNA(Gln) through the transamidation of misacylated Glu-tRNA(Gln) in organisms which lack glutaminyl-tRNA synthetase. The reaction takes place in the presence of glutamine and ATP through an activated gamma-phospho-Glu-tRNA(Gln)	30766.7	67883.7	35017.8	96839.6	41812.4	59433.9	81408	40643.1	30915.4	41582.7	18220.2	13869	33704.1	64097.8	1715.07	71026	>g|tr|g366048.t1	930945.SiRe_0345	4e-31	142.1	Crenarchaeota		3.5.1.4	ko:K01426	ko00330,ko00360,ko00380,ko00627,ko00643,ko01120,map00330,map00360,map00380,map00627,map00643,map01120		R02540,R03096,R03180,R03909,R05551,R05590	RC00010,RC00100,RC00950,RC01025	ko00000,ko00001,ko01000				Archaea	2XPYP@28889,COG0154@1,arCOG01717@2157	NA|NA|NA	J
g|tr|g367935.t1	Foraminifera	790	4	GloG15_CONTIG102614:541-605,668-807,867-1019,1094-1295,1372-1504(+)		GTPase Ypt71	459545	480158	478764	439607	400220	349321	374873	294195	442415	361332	492952	1.1021e+06	479265	370845	516746	409701	>g|tr|g367935.t1	866546.EPY54012	8.1e-43	180.6	Taphrinomycotina	GO:0000011,GO:0000322,GO:0000323,GO:0000324,GO:0000329,GO:0003674,GO:0003824,GO:0003924,GO:0005488,GO:0005515,GO:0005575,GO:0005622,GO:0005623,GO:0005737,GO:0005739,GO:0005740,GO:0005741,GO:0005773,GO:0005774,GO:0006810,GO:0006873,GO:0006885,GO:0006886,GO:0006892,GO:0006896,GO:0006897,GO:0006914,GO:0006996,GO:0007033,GO:0007034,GO:0007035,GO:0008104,GO:0008150,GO:0008152,GO:0009056,GO:0009987,GO:…		ko:K07897	ko04137,ko04138,ko04140,ko04144,ko04145,ko05132,ko05146,ko05152,map04137,map04138,map04140,map04144,map04145,map05132,map05146,map05152				ko00000,ko00001,ko04031,ko04131,ko04147				Fungi	38C61@33154,3MC8X@451866,3NWMV@4751,3QKEZ@4890,KOG0394@1,KOG0394@2759	NA|NA|NA	U
g|tr|g368091.t1	Foraminifera	427	4	GloG15_CONTIG102712:148-941,994-1315(-)		cysteine biosynthetic process from serine	1.54875e+06	1.85497e+06	1.11664e+06	1.85051e+06	1.48786e+06	1.80324e+06	1.00239e+06	1.59342e+06	2.31277e+06	1.55838e+06	1.23786e+06	629640	1.7989e+06	1.86952e+06	2.13266e+06	2.75104e+06	>g|tr|g368091.t1	227086.JGI_V11_57247	3.1e-121	441.8	Eukaryota												Eukaryota	COG0031@1,KOG1252@2759	NA|NA|NA	E
g|tr|g371183.t1	Foraminifera	493	15	GloG15_CONTIG104660:1-367,435-1010,1071-1154(+)		Belongs to the peptidase M16 family	1.88618e+06	2.11443e+06	1.60929e+06	1.82398e+06	2.34815e+06	3.29572e+06	3.9331e+06	1.52084e+06	1.33568e+06	1.3836e+06	1.55131e+06	1.73734e+06	2.24827e+06	1.49583e+06	1.8108e+06	2.1383e+06	>g|tr|g371183.t1	4113.PGSC0003DMT400003437	1.5e-64	253.4	asterids	GO:0003674,GO:0003824,GO:0004175,GO:0004222,GO:0005488,GO:0005575,GO:0005618,GO:0005622,GO:0005623,GO:0005634,GO:0005730,GO:0005737,GO:0005739,GO:0005740,GO:0005741,GO:0005743,GO:0005746,GO:0005750,GO:0005758,GO:0005759,GO:0005773,GO:0005774,GO:0006091,GO:0006119,GO:0006122,GO:0006139,GO:0006163,GO:0006508,GO:0006725,GO:0006753,GO:0006793,GO:0006796,GO:0006807,GO:0008150,GO:0008152,GO:0008233,GO:…	3.4.24.64	ko:K17732					ko00000,ko01000,ko01002,ko03029				Viridiplantae	37QB0@33090,3GBE3@35493,44MDZ@71274,COG0612@1,KOG0960@2759	NA|NA|NA	O
g|tr|g373231.t1	Foraminifera	141	4	GloG15_CONTIG105966:4-460,585-1963(+)			69773	29742.2	91700.2	74339.4	42316.8	44556.8	45288.3	60686.2	96641	63235.8	213835	174063	79268.7	48001	53284.9	74734.3
g|tr|g374422.t1	Foraminifera	1101	11	GloG15_CONTIG106705:1042-1387,1506-1525(+)			9.12064e+06	5.91606e+06	6.3102e+06	6.54906e+06	5.69873e+06	6.79557e+06	4.90317e+06	1.01517e+07	8.9844e+06	6.47774e+06	2.109e+06	1.63642e+06	5.129e+06	6.27847e+06	9.41838e+06	7.24579e+06
g|tr|g374464.t1	Foraminifera	244	1	GloG15_CONTIG106734:286-1595,1651-1807(-)	ALG2	GDP-Man:Man2GlcNAc2-PP-dolichol alpha-1,6-mannosyltransferase activity	84896.7	221613	143343	137607	188177	187753	216783	161987	175474	226603	245444	375286	231971	152262	162576	163311	>g|tr|g374464.t1	10224.XP_002740170.1	2.6e-83	316.2	Bilateria	GO:0000030,GO:0000033,GO:0003674,GO:0003824,GO:0005488,GO:0005515,GO:0005575,GO:0005622,GO:0005623,GO:0005634,GO:0005737,GO:0005783,GO:0005789,GO:0005829,GO:0005856,GO:0006464,GO:0006486,GO:0006487,GO:0006488,GO:0006490,GO:0006629,GO:0006807,GO:0008150,GO:0008152,GO:0009058,GO:0009059,GO:0009100,GO:0009101,GO:0009987,GO:0010035,GO:0010038,GO:0012505,GO:0015629,GO:0016020,GO:0016740,GO:0016757,GO:…	2.4.1.132,2.4.1.257	ko:K03843	ko00510,ko00513,ko01100,map00510,map00513,map01100	M00055	R05973,R06238		ko00000,ko00001,ko00002,ko01000,ko01003		GT4		Metazoa	38TSM@33154,3BCV6@33208,3CUT2@33213,COG0438@1,KOG0853@2759	NA|NA|NA	M
g|tr|g374695.t1	Foraminifera	156	5	GloG15_CONTIG106876:196-1907(+)		Ubiquitin-activating enzyme active site	326258	454111	427720	411683	564120	346470	654923	594574	536760	489913	484432	482833	713219	380716	282947	400805	>g|tr|g374695.t1	35128.Thaps33287	1.9e-125	456.4	Bacillariophyta	GO:0003674,GO:0003824,GO:0004839,GO:0005575,GO:0005622,GO:0005623,GO:0005634,GO:0005654,GO:0005737,GO:0005739,GO:0005829,GO:0006464,GO:0006508,GO:0006511,GO:0006807,GO:0006950,GO:0006974,GO:0008150,GO:0008152,GO:0008641,GO:0009056,GO:0009057,GO:0009987,GO:0016567,GO:0016874,GO:0016877,GO:0019538,GO:0019941,GO:0030163,GO:0031974,GO:0031981,GO:0032446,GO:0033554,GO:0036211,GO:0043170,GO:0043226,GO:…	6.2.1.45	ko:K03178	ko04120,ko05012,map04120,map05012				ko00000,ko00001,ko01000,ko04121,ko04147				Eukaryota	2XEWB@2836,COG0476@1,KOG2012@2759	NA|NA|NA	O
g|tr|g375075.t1	Foraminifera	660	1	GloG15_CONTIG107115:1368-2183(+)		vesicle-mediated transport	144713	400125	201287	326567	386101	376959	720925	249545	137357	535724	403729	28463.9	569655	251906	403145	270722	>g|tr|g375075.t1	227086.JGI_V11_37976	1.3e-71	276.6	Eukaryota	GO:0000139,GO:0003674,GO:0005488,GO:0005515,GO:0005575,GO:0005622,GO:0005623,GO:0005737,GO:0005768,GO:0005769,GO:0005794,GO:0005802,GO:0005829,GO:0006605,GO:0006622,GO:0006623,GO:0006810,GO:0006886,GO:0006892,GO:0006895,GO:0006896,GO:0007034,GO:0007041,GO:0008104,GO:0008150,GO:0012505,GO:0015031,GO:0015833,GO:0016020,GO:0016192,GO:0016482,GO:0019904,GO:0030117,GO:0030119,GO:0030124,GO:0031090,GO:…		ko:K12402	ko04142,map04142				ko00000,ko00001,ko04131				Eukaryota	KOG0937@1,KOG0937@2759	NA|NA|NA	U
g|tr|g376591.t1	Foraminifera	245	4	GloG15_CONTIG108077:338-465,521-1134,1277-1998(+)	hslU	this subunit has chaperone activity. The binding of ATP and its subsequent hydrolysis by HslU are essential for unfolding of protein substrates subsequently hydrolyzed by HslV. HslU recognizes the N-terminal part of its protein substrates and unfolds these before they are guided to HslV for hydrolysis	2785.13	86067.8	42957	61579.8	62401.2	48784.7	167452	39227.6	30650.2	95098.4	21504.1	5339.3	115620	21844.4	8639.65	31383.3	>g|tr|g376591.t1	1535287.JP74_05320	5.6e-110	404.8	Hyphomicrobiaceae	GO:0000166,GO:0000287,GO:0000502,GO:0003674,GO:0003824,GO:0005488,GO:0005515,GO:0005524,GO:0005575,GO:0005622,GO:0005623,GO:0005737,GO:0005829,GO:0006508,GO:0006807,GO:0006950,GO:0008144,GO:0008150,GO:0008152,GO:0008233,GO:0009266,GO:0009376,GO:0009408,GO:0009628,GO:0009987,GO:0016043,GO:0016462,GO:0016787,GO:0016817,GO:0016818,GO:0016887,GO:0017076,GO:0017111,GO:0019538,GO:0019904,GO:0022607,GO:…		ko:K03667					ko00000,ko03110				Bacteria	1MVK9@1224,2TRXC@28211,3N6AM@45401,COG1220@1,COG1220@2	NA|NA|NA	O
g|tr|g376844.t1	Foraminifera	844	4	GloG15_CONTIG108232:1500-2144(-)	FDH1	Catalyzes the NAD( )-dependent oxidation of formate to carbon dioxide. Formate oxidation is the final step in the methanol oxidation pathway in methylotrophic microorganisms. Has a role in the detoxification of exogenous formate in non- methylotrophic organisms	512039	992862	353216	607594	618310	568961	612894	436654	398139	581522	389834	238007	651979	493695	481222	595397	>g|tr|g376844.t1	325452.fgenesh_scip_prom.46568.472	4.8e-66	257.7	Peronosporales	GO:0003674,GO:0003824,GO:0005575,GO:0005576,GO:0005622,GO:0005623,GO:0005737,GO:0005739,GO:0005829,GO:0006082,GO:0006083,GO:0008150,GO:0008152,GO:0008863,GO:0009056,GO:0009507,GO:0009536,GO:0009579,GO:0009987,GO:0010035,GO:0010038,GO:0015942,GO:0016054,GO:0016491,GO:0016620,GO:0016903,GO:0016999,GO:0017001,GO:0017144,GO:0019752,GO:0032787,GO:0042183,GO:0042221,GO:0042737,GO:0043226,GO:0043227,GO:…	1.17.1.9	ko:K00122	ko00630,ko00680,ko01100,ko01120,ko01200,map00630,map00680,map01100,map01120,map01200		R00519	RC02796	ko00000,ko00001,ko01000			iMM904.YOR388C,iND750.YOR388C	Eukaryota	3Q9JW@4776,COG1052@1,KOG0069@2759	NA|NA|NA	C
g|tr|g377050.t1	Foraminifera	305	2	GloG15_CONTIG108368:365-1112,1171-1479,1560-1837(-)	SLC1A4	amino acid transporter	169473	183440	19822.2	103655	146814	111407	81993.2	157989	203580	101551	76726.7	72054.2	106643	187994	130399	145542	>g|tr|g377050.t1	55529.EKX55543	4e-46	192.6	Eukaryota	GO:0000099,GO:0000101,GO:0000902,GO:0000904,GO:0001101,GO:0001504,GO:0001505,GO:0002027,GO:0003008,GO:0003009,GO:0003012,GO:0003333,GO:0003674,GO:0005215,GO:0005216,GO:0005253,GO:0005254,GO:0005283,GO:0005310,GO:0005313,GO:0005314,GO:0005326,GO:0005328,GO:0005342,GO:0005343,GO:0005368,GO:0005369,GO:0005416,GO:0005488,GO:0005575,GO:0005622,GO:0005623,GO:0005737,GO:0005739,GO:0005740,GO:0005743,GO:…		ko:K05612,ko:K05613,ko:K05614,ko:K05615,ko:K05616,ko:K05617,ko:K05618	ko04724,ko04974,ko05014,ko05230,map04724,map04974,map05014,map05230				ko00000,ko00001,ko02000,ko04147	2.A.23,2.A.23.2.1,2.A.23.2.2,2.A.23.2.3			Eukaryota	COG1301@1,KOG3787@2759	NA|NA|NA	C
g|tr|g377452.t1	Foraminifera	662	4	GloG15_CONTIG108620:1257-2072(-)		Nascent polypeptide-associated complex subunit beta	618962	1.13413e+06	1.00227e+06	1.00562e+06	1.25554e+06	1.45749e+06	2.0502e+06	1.02248e+06	591047	1.36922e+06	292230	269959	1.80017e+06	545895	826436	865624	>g|tr|g377452.t1	161934.XP_010668829.1	5.2e-25	121.7	Streptophyta			ko:K01527	ko04214,map04214				ko00000,ko00001				Viridiplantae	37U4X@33090,3G74S@35493,KOG2240@1,KOG2240@2759	NA|NA|NA	K
g|tr|g377855.t1	Foraminifera	607	1	GloG15_CONTIG108889:1110-2009(-)		Destroys radicals which are normally produced within the cells and which are toxic to biological systems	200102	404777	266300	320199	204663	233211	247665	335179	183312	227220	258714	288360	240252	157774	190853	349746	>g|tr|g377855.t1	5932.XP_004035843.1	9.2e-47	194.1	Ciliophora		1.15.1.1	ko:K04565	ko04146,ko04213,ko05014,ko05016,ko05020,map04146,map04213,map05014,map05016,map05020				ko00000,ko00001,ko01000				Eukaryota	3ZE7H@5878,COG2032@1,KOG0441@2759	NA|NA|NA	Q
g|tr|g380455.t1	Foraminifera	947	1	GloG15_CONTIG110545:916-1374,1442-1540(-)			430346	691363	722556	595761	1.03226e+06	939592	1.09548e+06	890111	1.1685e+06	702649	595776	158668	902129	467547	1.16223e+06	473863
g|tr|g380589.t1	Foraminifera	960	10	GloG15_CONTIG110642:38-399,497-677(-)		modification-dependent protein catabolic process	4.01999e+06	2.90184e+06	2.35233e+06	2.6815e+06	2.97679e+06	2.87818e+06	2.68928e+06	3.44911e+06	3.06825e+06	2.54799e+06	3.29505e+06	3.3034e+06	2.9092e+06	3.38527e+06	3.5711e+06	3.65832e+06	>g|tr|g380589.t1	227086.JGI_V11_52203	1.7e-27	129.4	Eukaryota			ko:K03094	ko04110,ko04111,ko04114,ko04120,ko04141,ko04310,ko04341,ko04350,ko04710,ko05168,ko05200,map04110,map04111,map04114,map04120,map04141,map04310,map04341,map04350,map04710,map05168,map05200	M00379,M00380,M00381,M00382,M00387,M00407,M00411			ko00000,ko00001,ko00002,ko03036,ko04121				Eukaryota	COG5201@1,KOG1724@2759	NA|NA|NA	O
g|tr|g383731.t1	Foraminifera	160	1	GloG15_CONTIG112658:141-310,389-702,780-1137,1202-2054(+)	SEY1	GTP-binding protein that may be involved in cell development	99190.4	169043	41712.7	67917	121099	165881	221747	244399	42774	153467	50134.4	25851.4	137154	47965.2	218597	205784	>g|tr|g383731.t1	5786.XP_003283271.1	5.9e-63	248.8	Amoebozoa	GO:0000166,GO:0001882,GO:0001883,GO:0003674,GO:0003824,GO:0003924,GO:0005488,GO:0005525,GO:0005575,GO:0005622,GO:0005623,GO:0005737,GO:0005783,GO:0005933,GO:0005938,GO:0006810,GO:0006996,GO:0007029,GO:0008150,GO:0008643,GO:0008645,GO:0009405,GO:0009987,GO:0010256,GO:0012505,GO:0015749,GO:0016020,GO:0016021,GO:0016043,GO:0016192,GO:0016320,GO:0016462,GO:0016787,GO:0016817,GO:0016818,GO:0017076,GO:…											Eukaryota	3X874@554915,KOG2203@1,KOG2203@2759	NA|NA|NA	S
g|tr|g383881.t1	Foraminifera	515	8	GloG15_CONTIG112753:14-611,700-1101(-)	UGDH1	UDP-glucose 6-dehydrogenase activity	1.75127e+06	1.44034e+06	1.08048e+06	1.38115e+06	1.69737e+06	1.81651e+06	2.61412e+06	1.8077e+06	1.56279e+06	1.41687e+06	1.21612e+06	1.13364e+06	1.88141e+06	1.72859e+06	1.88576e+06	1.42911e+06	>g|tr|g383881.t1	227086.JGI_V11_46873	5.1e-115	421.0	Eukaryota		1.1.1.22	ko:K00012	ko00040,ko00053,ko00520,ko01100,map00040,map00053,map00520,map01100	M00014,M00129,M00361,M00362	R00286	RC00291	ko00000,ko00001,ko00002,ko01000				Eukaryota	COG1004@1,KOG2666@2759	NA|NA|NA	M
g|tr|g384581.t1	Foraminifera	432	1	GloG15_CONTIG113202:823-1545,1606-1992(+)	TRIP-1	component of the eukaryotic translation initiation factor 3 (eIF-3) complex, which is involved in protein synthesis of a specialized repertoire of mRNAs and, together with other initiation factors, stimulates binding of mRNA and methionyl-tRNAi to the 40S ribosome. The eIF-3 complex specifically targets and initiates translation of a subset of mRNAs involved in cell proliferation	15365.7	126904	22021.4	77703.9	88225.4	92380.9	188949	78808.7	37831.2	40380.9	23061.1	32923.6	92869.4	65672.1	1087.34	47203.8	>g|tr|g384581.t1	3218.PP1S65_136V6.1	1.6e-40	173.7	Streptophyta	GO:0000151,GO:0005575,GO:0005622,GO:0005623,GO:0005737,GO:0005829,GO:0006950,GO:0006970,GO:0008150,GO:0009628,GO:0009651,GO:0010035,GO:0010038,GO:0031461,GO:0032991,GO:0042221,GO:0044424,GO:0044444,GO:0044464,GO:0046686,GO:0050896,GO:0080008,GO:1902494,GO:1990234		ko:K03246	ko03013,map03013				ko00000,ko00001,ko03012				Viridiplantae	37QEV@33090,3GBEK@35493,KOG0643@1,KOG0643@2759	NA|NA|NA	JT
g|tr|g385223.t1	Foraminifera	663	2	GloG15_CONTIG113627:8-391,455-884(-)	PYR5	Uridine 5-monophosphate	347331	303896	168147	231055	357157	449071	681518	356445	230568	336514	282282	164274	296005	240174	303386	322907	>g|tr|g385223.t1	3880.AES68880	3.6e-66	258.5	fabids	GO:0005575,GO:0005622,GO:0005623,GO:0005737,GO:0005829,GO:0006950,GO:0007154,GO:0008150,GO:0009267,GO:0009605,GO:0009987,GO:0009991,GO:0010035,GO:0010038,GO:0016036,GO:0031667,GO:0031668,GO:0031669,GO:0033554,GO:0042221,GO:0042594,GO:0044424,GO:0044444,GO:0044464,GO:0046686,GO:0050896,GO:0051716,GO:0071496	2.4.2.10,4.1.1.23	ko:K12486,ko:K13421	ko00240,ko00983,ko01100,ko04144,map00240,map00983,map01100,map04144	M00051	R00965,R01870,R08231	RC00063,RC00409,RC00611	ko00000,ko00001,ko00002,ko01000,ko04131				Viridiplantae	37INB@33090,3GBYY@35493,4JNNC@91835,COG0461@1,KOG1377@2759	NA|NA|NA	F
g|tr|g385426.t1	Foraminifera	837	1	GloG15_CONTIG113755:1282-1722,1785-1991(-)			822100	916091	1.09222e+06	952075	960140	833618	853890	730110	966077	816732	824537	622180	1.17294e+06	709702	961437	877773
g|tr|g385727.t1-tr|193811888|dbj|BAG54798.1|(86.65%)	Both	242	13	translation elongation factor-like protein, partial [Planoglabratella opercularis]		regulation of response to stimulus	1.34362e+06	4.57676e+06	3.48973e+06	4.35292e+06	4.84856e+06	3.22978e+06	7.36918e+06	4.67185e+06	2.40688e+06	5.61187e+06	2.70003e+06	1.93492e+06	7.07577e+06	2.84437e+06	1.91348e+06	3.93754e+06	>g|tr|g385727.t1	3067.XP_002945791.1	1.3e-138	500.0	Chlorophyta			ko:K03231	ko03013,ko05134,map03013,map05134				ko00000,ko00001,ko03012,ko03016,ko03019,ko04131,ko04147				Viridiplantae	34H6Y@3041,37KSK@33090,COG5256@1,KOG0052@2759	NA|NA|NA	J
g|tr|g387151.t1	Foraminifera	779	2	GloG15_CONTIG114901:60-712,818-872(-)		Protein of unknown function (DUF3228)	195997	144926	288330	167350	185958	207951	220693	240456	163476	216850	134270	149157	185948	182489	208400	202773	>g|tr|g387151.t1	227086.JGI_V11_135674	3.4e-44	185.3	Eukaryota												Eukaryota	29VSF@1,2RXMS@2759	NA|NA|NA	S
g|tr|g387664.t1	Foraminifera	735	10	GloG15_CONTIG115247:982-1176,1235-1789(-)	PSMA4	threonine-type endopeptidase activity	1.28358e+06	878662	568700	738860	1.264e+06	1.25007e+06	1.37081e+06	1.2764e+06	1.16024e+06	888544	1.39784e+06	1.20727e+06	1.18277e+06	1.24278e+06	1.23397e+06	1.073e+06	>g|tr|g387664.t1	55529.EKX45253	9e-64	250.4	Eukaryota	GO:0000502,GO:0000932,GO:0001673,GO:0005575,GO:0005622,GO:0005623,GO:0005634,GO:0005654,GO:0005737,GO:0005773,GO:0005829,GO:0005839,GO:0005840,GO:0006464,GO:0006508,GO:0006511,GO:0006807,GO:0007088,GO:0007346,GO:0008150,GO:0008152,GO:0009056,GO:0009057,GO:0009896,GO:0009987,GO:0010035,GO:0010038,GO:0010498,GO:0010499,GO:0010564,GO:0010638,GO:0010965,GO:0012505,GO:0016020,GO:0016043,GO:0016579,GO:…	3.4.25.1,6.5.1.1,6.5.1.6,6.5.1.7	ko:K02728,ko:K10747	ko03030,ko03050,ko03410,ko03420,ko03430,map03030,map03050,map03410,map03420,map03430	M00337,M00340	R00381,R00382,R10822,R10823	RC00005	ko00000,ko00001,ko00002,ko01000,ko01002,ko03032,ko03051,ko03400				Eukaryota	COG0638@1,KOG0178@2759	NA|NA|NA	O
g|tr|g388242.t1	Foraminifera	687	1	GloG15_CONTIG115644:53-847(-)			166092	202409	201369	173750	213190	240422	562382	317787	210535	185313	270234	363118	360937	288493	237589	322411
g|tr|g388504.t1	Foraminifera	431	1	GloG15_CONTIG115818:220-264,326-1393(+)	DRG1	GTP binding	17643.9	218248	214993	267353	170745	118790	202737	107258	93562.8	333145	180016	445030	407844	113426	58420.9	132685	>g|tr|g388504.t1	227086.JGI_V11_51335	2e-128	465.7	Eukaryota	GO:0000166,GO:0001882,GO:0001883,GO:0002181,GO:0003674,GO:0003824,GO:0003924,GO:0005488,GO:0005515,GO:0005525,GO:0005575,GO:0005622,GO:0005623,GO:0005634,GO:0005654,GO:0005737,GO:0005829,GO:0005844,GO:0006139,GO:0006351,GO:0006412,GO:0006518,GO:0006725,GO:0006807,GO:0007275,GO:0008134,GO:0008150,GO:0008152,GO:0009058,GO:0009059,GO:0009987,GO:0010467,GO:0010494,GO:0010646,GO:0010647,GO:0016070,GO:…		ko:K02156,ko:K06944	ko04320,map04320				ko00000,ko00001,ko03036				Eukaryota	COG1163@1,KOG1487@2759	NA|NA|NA	S
g|tr|g388657.t1	Foraminifera	177	10	GloG15_CONTIG115924:1-1638(+)	EHD4	endocytic recycling	722006	684367	565699	662598	641697	647011	726985	877670	932021	666450	421284	843115	699280	706862	662133	744799	>g|tr|g388657.t1	529818.AMSG_05001T0	4.6e-145	521.5	Eukaryota	GO:0000003,GO:0001654,GO:0001745,GO:0001751,GO:0001754,GO:0001881,GO:0001932,GO:0001934,GO:0002009,GO:0002165,GO:0003002,GO:0003006,GO:0003407,GO:0003674,GO:0003676,GO:0003824,GO:0005488,GO:0005515,GO:0005575,GO:0005576,GO:0005622,GO:0005623,GO:0005634,GO:0005737,GO:0005768,GO:0005769,GO:0005783,GO:0005811,GO:0005829,GO:0005856,GO:0005886,GO:0005901,GO:0005911,GO:0005929,GO:0006810,GO:0006886,GO:…		ko:K12469,ko:K12476,ko:K12477,ko:K12483	ko04144,map04144				ko00000,ko00001,ko04131,ko04147				Eukaryota	KOG1954@1,KOG1954@2759	NA|NA|NA	S
g|tr|g388816.t1	Foraminifera	260	2	GloG15_CONTIG116032:589-1024,1092-2080(+)		Acyl-CoA dehydrogenase, C-terminal domain	22744.6	29713.1	74177.3	27606.2	32737.2	50109.7	80469.4	11129.7	40127.5	26033.9	40480.5	189624	64408.3	38209.8	194319	39210.4	>g|tr|g388816.t1	41875.XP_007508424.1	3.2e-86	325.9	Chlorophyta		1.3.8.4	ko:K00253	ko00280,ko01100,map00280,map01100	M00036	R04095	RC00246	ko00000,ko00001,ko00002,ko01000				Viridiplantae	34PDF@3041,389Q5@33090,COG1960@1,KOG0141@2759	NA|NA|NA	E
g|tr|g388904.t1	Foraminifera	865	4	GloG15_CONTIG116088:184-807(+)		Rab subfamily of small GTPases	375332	441427	517546	479983	365010	406885	291223	307328	390925	462821	142048	358901	301454	262320	432902	451266	>g|tr|g388904.t1	4787.PITG_00681T0	1.6e-74	285.8	Peronosporales			ko:K07874	ko05134,map05134				ko00000,ko00001,ko04031,ko04131,ko04147				Eukaryota	3QEJ4@4776,KOG0084@1,KOG0084@2759	NA|NA|NA	U
g|tr|g389153.t1	Foraminifera	406	2	GloG15_CONTIG116256:866-1482,1542-2077(+)		dipeptidase activity	1.64089e+06	2.74798e+06	859158	1.9428e+06	1.64646e+06	2.32068e+06	4.04089e+06	1.60721e+06	2.56771e+06	1.77015e+06	1.6491e+06	1.01914e+06	1.56009e+06	1.50909e+06	1.8722e+06	2.73667e+06	>g|tr|g389153.t1	5786.XP_003285877.1	6.6e-98	364.4	Eukaryota		3.4.13.18	ko:K08660	ko00330,ko00340,ko00410,ko01100,map00330,map00340,map00410,map01100		R01166,R01992	RC00064,RC00090	ko00000,ko00001,ko01000,ko01002,ko04147				Eukaryota	COG0624@1,KOG2276@2759	NA|NA|NA	E
g|tr|g389808.t1	Foraminifera	459	1	GloG15_CONTIG116672:948-1493,1552-2073(+)	gor	Belongs to the class-I pyridine nucleotide-disulfide oxidoreductase family	372849	477287	1.91166e+06	1.11276e+06	605080	544760	643459	528137	315545	386279	615913	898633	471838	819266	366180	532085	>g|tr|g389808.t1	1123300.AUIN01000010_gene23	6.1e-74	284.6	Bacilli	GO:0000166,GO:0003674,GO:0003824,GO:0004362,GO:0005488,GO:0005575,GO:0005622,GO:0005623,GO:0005737,GO:0008150,GO:0008152,GO:0009636,GO:0009987,GO:0015036,GO:0015037,GO:0015038,GO:0016209,GO:0016491,GO:0016651,GO:0016667,GO:0016668,GO:0036094,GO:0042221,GO:0043167,GO:0043168,GO:0044424,GO:0044464,GO:0048037,GO:0050660,GO:0050662,GO:0050896,GO:0051716,GO:0055114,GO:0070887,GO:0071949,GO:0097159,GO:…	1.8.1.7	ko:K00383	ko00480,ko04918,map00480,map04918		R00094,R00115	RC00011	ko00000,ko00001,ko01000			iZ_1308.Z4900	Bacteria	1TQFH@1239,4HCT8@91061,COG1249@1,COG1249@2	NA|NA|NA	C
g|tr|g392180.t1	Foraminifera	685	2	GloG15_CONTIG118275:1106-1903(-)		glutathione transferase activity	988433	1.16232e+06	647510	944026	1.05212e+06	715540	557152	871421	1.50395e+06	911556	177336	187389	719693	622759	912051	1.08565e+06	>g|tr|g392180.t1	227086.JGI_V11_47794	1.2e-13	84.0	Eukaryota	GO:0008150,GO:0010033,GO:0014070,GO:0042221,GO:0042493,GO:0045472,GO:0046677,GO:0050896,GO:0097327,GO:1901654,GO:1901700,GO:1904643	2.5.1.18,5.3.99.2	ko:K00799,ko:K04097	ko00480,ko00590,ko00980,ko00982,ko00983,ko01100,ko01524,ko05200,ko05204,ko05225,ko05418,map00480,map00590,map00980,map00982,map00983,map01100,map01524,map05200,map05204,map05225,map05418		R02266,R03522,R07002,R07003,R07004,R07023,R07024,R07025,R07026,R07069,R07070,R07083,R07084,R07091,R07092,R07093,R07094,R07100,R07113,R07116,R08280,R09409,R11905	RC00004,RC00069,RC00672,RC00840,RC00948,RC01704,RC01705,RC01706,RC01758,RC01759,RC01765,RC01767,RC01769,RC02243,RC02527,RC02939,RC02940,RC02942,RC02943,RC02944	ko00000,ko00001,ko01000,ko02000	1.A.12.2.2,1.A.12.3.2			Eukaryota	KOG1695@1,KOG1695@2759	NA|NA|NA	O
g|tr|g392462.t1	Foraminifera	776	9	GloG15_CONTIG118460:1277-1987(+)		Belongs to the AAA ATPase family	351505	412289	478743	412234	512544	516681	800683	511112	527896	482749	461498	626228	574855	485678	374668	416862	>g|tr|g392462.t1	112098.XP_008616989.1	4.1e-50	204.9	Eukaryota	GO:0000166,GO:0000502,GO:0000731,GO:0002020,GO:0002082,GO:0003674,GO:0003824,GO:0005102,GO:0005488,GO:0005515,GO:0005524,GO:0005575,GO:0005622,GO:0005623,GO:0005634,GO:0005654,GO:0005694,GO:0005737,GO:0005783,GO:0005789,GO:0005811,GO:0005829,GO:0006139,GO:0006140,GO:0006163,GO:0006259,GO:0006281,GO:0006301,GO:0006302,GO:0006464,GO:0006486,GO:0006487,GO:0006508,GO:0006511,GO:0006515,GO:0006725,GO:…		ko:K03065	ko03050,ko05169,map03050,map05169	M00341			ko00000,ko00001,ko00002,ko03051				Eukaryota	COG1222@1,KOG0652@2759	NA|NA|NA	O
g|tr|g393491.t1	Foraminifera	456	1	GloG15_CONTIG119138:68-691,801-1253(+)	RPP0	Ribosomal protein P0 is the functional equivalent of E.coli protein L10	924835	1.10453e+06	1.02047e+06	1.04548e+06	1.9088e+06	1.2892e+06	1.96466e+06	884672	718226	779189	621928	1.46017e+06	1.23702e+06	824504	554637	666198	>g|tr|g393491.t1	4577.GRMZM2G179976_P01	7.6e-64	251.1	Poales	GO:0003674,GO:0003735,GO:0005198,GO:0005488,GO:0005575,GO:0005622,GO:0005623,GO:0005737,GO:0005829,GO:0005840,GO:0006950,GO:0008150,GO:0009628,GO:0015934,GO:0022625,GO:0022626,GO:0032991,GO:0034059,GO:0036293,GO:0043226,GO:0043228,GO:0043229,GO:0043232,GO:0044391,GO:0044422,GO:0044424,GO:0044444,GO:0044445,GO:0044446,GO:0044464,GO:0044877,GO:0050896,GO:0070482,GO:1990904		ko:K02941	ko03010,map03010	M00177			br01610,ko00000,ko00001,ko00002,ko03011				Viridiplantae	37JZZ@33090,3GA5W@35493,3I7HN@38820,3KRTS@4447,COG0244@1,KOG0815@2759	NA|NA|NA	J
g|tr|g394412.t1	Foraminifera	1105	1	GloG15_CONTIG119749:1-177,261-440(+)	ARPC4	Functions as actin-binding component of the Arp2 3 complex which is involved in regulation of actin polymerization and together with an activating nucleation-promoting factor (NPF) mediates the formation of branched actin networks. Seems to contact the mother actin filament	3.06481e+06	1.96581e+06	2.79669e+06	2.33364e+06	1.69139e+06	1.93039e+06	1.95949e+06	2.48244e+06	2.9261e+06	1.65158e+06	2.39875e+06	4.48279e+06	1.89963e+06	1.92131e+06	2.81077e+06	2.15567e+06	>g|tr|g394412.t1	215358.XP_010753749.1	4.9e-36	157.1	Actinopterygii	GO:0000902,GO:0001667,GO:0002009,GO:0002252,GO:0002253,GO:0002376,GO:0002429,GO:0002431,GO:0002433,GO:0002682,GO:0002684,GO:0002757,GO:0002764,GO:0002768,GO:0003674,GO:0003779,GO:0005198,GO:0005200,GO:0005488,GO:0005515,GO:0005575,GO:0005622,GO:0005623,GO:0005737,GO:0005829,GO:0005856,GO:0005885,GO:0006810,GO:0006897,GO:0006909,GO:0006928,GO:0006950,GO:0006996,GO:0007010,GO:0007015,GO:0007154,GO:…	1.4.3.5	ko:K00275,ko:K05755	ko00750,ko01100,ko01120,ko04144,ko04666,ko04810,ko05100,ko05130,ko05131,ko05132,map00750,map01100,map01120,map04144,map04666,map04810,map05100,map05130,map05131,map05132	M00124	R00277,R00278,R01710,R01711	RC00048,RC00116	ko00000,ko00001,ko00002,ko01000,ko04131,ko04812				Metazoa	38GVI@33154,3BF7X@33208,3CYQW@33213,482NB@7711,49602@7742,49RGT@7898,KOG1876@1,KOG1876@2759	NA|NA|NA	Z
g|tr|g394589.t1	Foraminifera	145	2	GloG15_CONTIG119864:1-1177,1236-1833(-)		Alpha mannosidase, middle domain	870402	387341	394785	414099	471121	559722	720759	1.53188e+06	565398	618779	404597	682842	410695	724755	437320	628665	>g|tr|g394589.t1	44689.DDB0201569	1.5e-45	191.0	Amoebozoa	GO:0000323,GO:0003674,GO:0003824,GO:0004553,GO:0004559,GO:0005575,GO:0005622,GO:0005623,GO:0005737,GO:0005764,GO:0005773,GO:0005975,GO:0005996,GO:0006013,GO:0006464,GO:0006517,GO:0006807,GO:0008150,GO:0008152,GO:0009100,GO:0009987,GO:0015923,GO:0016787,GO:0016798,GO:0019318,GO:0019538,GO:0030139,GO:0031410,GO:0031982,GO:0032009,GO:0036211,GO:0043170,GO:0043226,GO:0043227,GO:0043229,GO:0043231,GO:…	3.2.1.114,3.2.1.24	ko:K01191,ko:K01231,ko:K12311	ko00510,ko00511,ko00513,ko01100,ko04142,map00510,map00511,map00513,map01100,map04142	M00075	R05984,R08717,R08718		ko00000,ko00001,ko00002,ko01000,ko04131		GH38		Eukaryota	3XARD@554915,KOG1959@1,KOG1959@2759	NA|NA|NA	G
g|tr|g396286.t1	Foraminifera	642	6	GloG15_CONTIG121022:304-695,766-1210(+)	UCHL1	thiol-dependent ubiquitin-specific protease activity	328131	318625	346136	303576	302213	352254	282825	261614	338836	250973	353919	438271	329714	296362	297931	320594	>g|tr|g396286.t1	227086.JGI_V11_88113	1.2e-56	226.9	Eukaryota	GO:0000338,GO:0000902,GO:0000904,GO:0001654,GO:0001664,GO:0001932,GO:0001933,GO:0002931,GO:0003008,GO:0003674,GO:0003824,GO:0004175,GO:0004197,GO:0004843,GO:0005102,GO:0005488,GO:0005515,GO:0005575,GO:0005622,GO:0005623,GO:0005634,GO:0005654,GO:0005737,GO:0005829,GO:0006464,GO:0006469,GO:0006508,GO:0006511,GO:0006807,GO:0006810,GO:0006928,GO:0006950,GO:0007017,GO:0007018,GO:0007154,GO:0007275,GO:…	3.4.19.12,3.6.1.59	ko:K05609,ko:K05611,ko:K12584	ko03018,ko05012,map03018,map05012		R04368	RC00002	ko00000,ko00001,ko01000,ko01002,ko03019,ko04121				Eukaryota	KOG1415@1,KOG1415@2759	NA|NA|NA	E
g|tr|g396546.t1	Foraminifera	413	2	GloG15_CONTIG121193:686-1825(-)		Fructose-1-6-bisphosphatase, N-terminal domain	1.28597e+06	2.22303e+06	1.40642e+06	1.68228e+06	1.93164e+06	1.45564e+06	1.54742e+06	2.26192e+06	1.74022e+06	1.99349e+06	2.27218e+06	3.53585e+06	1.98745e+06	2.58504e+06	1.53777e+06	1.95674e+06	>g|tr|g396546.t1	7425.NV11497-PA	8.8e-79	300.8	Hymenoptera	GO:0003674,GO:0003824,GO:0005575,GO:0005622,GO:0005623,GO:0005737,GO:0005829,GO:0005975,GO:0005984,GO:0005985,GO:0005986,GO:0005996,GO:0006000,GO:0006002,GO:0006006,GO:0006094,GO:0006793,GO:0006796,GO:0008150,GO:0008152,GO:0009058,GO:0009311,GO:0009312,GO:0009987,GO:0016051,GO:0016311,GO:0016787,GO:0016788,GO:0016791,GO:0019203,GO:0019318,GO:0019319,GO:0019637,GO:0030388,GO:0034637,GO:0042132,GO:…	3.1.3.11	ko:K03841	ko00010,ko00030,ko00051,ko00680,ko00710,ko01100,ko01110,ko01120,ko01130,ko01200,ko04152,ko04910,map00010,map00030,map00051,map00680,map00710,map01100,map01110,map01120,map01130,map01200,map04152,map04910	M00003,M00165,M00167,M00344	R00762,R04780	RC00017	ko00000,ko00001,ko00002,ko01000,ko04147				Arthropoda	38D1X@33154,3BCGC@33208,3CTTF@33213,3SJRQ@50557,41UZ0@6656,46JNA@7399,COG0158@1,KOG1458@2759	NA|NA|NA	G
g|tr|g397638.t1	Foraminifera	209	1	GloG15_CONTIG121931:1-127,328-691,759-1262,1320-1874(+)		sulfite reductase (ferredoxin) activity	67390.2	118103	145819	99714.8	103043	173155	354901	36921.2	154401	162012	80871.8	9093.94	313886	58636.9	53144.4	40944.7	>g|tr|g397638.t1	55529.EKX48323	1.9e-84	320.1	Eukaryota		1.16.1.5,1.2.1.51,1.6.2.4	ko:K00327,ko:K21682	ko00860,ko01100,map00860,map01100		R00107	RC00220	ko00000,ko00001,ko01000				Eukaryota	COG0155@1,COG0369@1,KOG0560@2759,KOG1159@2759	NA|NA|NA	P
g|tr|g399453.t1	Foraminifera	520	1	GloG15_CONTIG123143:231-238,303-1287(+)	UBB	ubiquitin	269142	112416	2.05891e+06	443133	166149	76954.1	246137	108899	196594	84104.9	499937	2.36184e+06	273064	237938	61648	71522.9	>g|tr|g399453.t1	109478.XP_005870266.1	6e-31	141.7	Mammalia			ko:K04551	ko04137,ko04144,ko05012,ko05167,map04137,map04144,map05012,map05167				ko00000,ko00001,ko04121,ko04147				Mammalia	38ECC@33154,3B9NC@33208,3CXIG@33213,3J915@40674,484F0@7711,495KV@7742,COG5272@1,KOG0001@2759	NA|NA|NA	O
g|tr|g401817.t1	Foraminifera	559	1	GloG15_CONTIG124743:102-337,394-836,911-1172(-)		Phenylalanine--tRNA ligase beta subunit	123405	268461	243499	273961	262862	207707	202730	123286	94997	390463	52857.2	206725	396017	185012	76757.8	110018	>g|tr|g401817.t1	4432.XP_010246767.1	2.3e-80	305.8	Streptophyta	GO:0005575,GO:0005622,GO:0005623,GO:0005737,GO:0005829,GO:0006082,GO:0006139,GO:0006399,GO:0006412,GO:0006418,GO:0006432,GO:0006518,GO:0006520,GO:0006725,GO:0006807,GO:0008150,GO:0008152,GO:0009058,GO:0009059,GO:0009328,GO:0009987,GO:0010467,GO:0016070,GO:0019538,GO:0019752,GO:0032991,GO:0034641,GO:0034645,GO:0034660,GO:0043038,GO:0043039,GO:0043043,GO:0043170,GO:0043436,GO:0043603,GO:0043604,GO:…	6.1.1.20	ko:K01890	ko00970,map00970	M00359,M00360	R03660	RC00055,RC00523	ko00000,ko00001,ko00002,ko01000,ko01007,ko03016				Viridiplantae	37QBY@33090,3G9AC@35493,COG0072@1,KOG2472@2759	NA|NA|NA	J
g|tr|g401818.t1	Foraminifera	349	1	GloG15_CONTIG124744:6-1241(+)	MSM1	Methionyl-tRNA synthetase. Source PGD	33862.7	254518	34257.6	95692	99376	164303	243276	159960	124386	175867	6062.1	91038.2	168164	64874.9	44117.7	113186	>g|tr|g401818.t1	65071.PYU1_T011426	9.3e-74	284.3	Pythiales	GO:0000166,GO:0003674,GO:0003824,GO:0004812,GO:0004825,GO:0005488,GO:0005524,GO:0005575,GO:0005622,GO:0005623,GO:0005737,GO:0005739,GO:0005759,GO:0006082,GO:0006139,GO:0006399,GO:0006412,GO:0006418,GO:0006431,GO:0006518,GO:0006520,GO:0006725,GO:0006807,GO:0008144,GO:0008150,GO:0008152,GO:0009058,GO:0009059,GO:0009987,GO:0010467,GO:0016070,GO:0016874,GO:0016875,GO:0017076,GO:0019538,GO:0019752,GO:…	6.1.1.10	ko:K01874,ko:K15437	ko00450,ko00970,map00450,map00970	M00359,M00360	R03659,R04773	RC00055,RC00523	ko00000,ko00001,ko00002,ko01000,ko01007,ko03016				Eukaryota	1MBCH@121069,COG0143@1,KOG0436@2759,KOG2241@2759	NA|NA|NA	J
g|tr|g402015.t1	Foraminifera	111	1	GloG15_CONTIG124887:1-1950(-)			332058	669895	1.91843e+06	1.1209e+06	1.13596e+06	888289	1.74319e+06	638852	761172	2.09445e+06	1.02409e+06	743865	3.77895e+06	572948	449812	751935
g|tr|g402275.t1	Foraminifera	158	2	GloG15_CONTIG125059:24-275,347-1798(+)	VPS35	Plays a role in vesicular protein sorting	955905	794189	792078	863884	887375	895344	825001	950739	1.17666e+06	888355	470916	1.49443e+06	862144	971456	883938	949515	>g|tr|g402275.t1	192875.XP_004363510.1	3.2e-56	226.5	Opisthokonta	GO:0000322,GO:0000323,GO:0000324,GO:0000329,GO:0001664,GO:0002791,GO:0002793,GO:0003674,GO:0005102,GO:0005215,GO:0005488,GO:0005515,GO:0005575,GO:0005622,GO:0005623,GO:0005737,GO:0005764,GO:0005768,GO:0005769,GO:0005770,GO:0005773,GO:0005774,GO:0005829,GO:0006508,GO:0006624,GO:0006807,GO:0006810,GO:0006839,GO:0006886,GO:0006897,GO:0006915,GO:0006996,GO:0007005,GO:0007033,GO:0007034,GO:0007040,GO:…		ko:K18468	ko04144,map04144				ko00000,ko00001,ko04131				Opisthokonta	38DTF@33154,KOG1107@1,KOG1107@2759	NA|NA|NA	U
g|tr|g402781.t1	Foraminifera	1005	1	GloG15_CONTIG125403:1353-1556,1621-1911(-)	Ndufv2	Thioredoxin-like [2Fe-2S] ferredoxin	172251	164783	114001	125638	168742	253016	305863	46809.1	72059.3	86657.1	90939.7	25664.4	131098	86448	97819.9	189483	>g|tr|g402781.t1	5888.CAK72238	8.3e-42	176.8	Ciliophora	GO:0003674,GO:0003824,GO:0003954,GO:0005488,GO:0005575,GO:0005622,GO:0005623,GO:0005737,GO:0005739,GO:0005740,GO:0005743,GO:0005746,GO:0005747,GO:0006091,GO:0006119,GO:0006120,GO:0006139,GO:0006163,GO:0006725,GO:0006753,GO:0006793,GO:0006796,GO:0006807,GO:0006950,GO:0006979,GO:0008137,GO:0008150,GO:0008152,GO:0008270,GO:0009117,GO:0009123,GO:0009126,GO:0009141,GO:0009144,GO:0009150,GO:0009161,GO:…	1.6.5.3,1.6.99.3	ko:K03347,ko:K03943,ko:K10609	ko00190,ko01100,ko03420,ko04110,ko04111,ko04114,ko04120,ko04141,ko04310,ko04340,ko04341,ko04350,ko04710,ko04714,ko04723,ko04932,ko05010,ko05012,ko05016,ko05168,ko05200,map00190,map01100,map03420,map04110,map04111,map04114,map04120,map04141,map04310,map04340,map04341,map04350,map04710,map04714,map04723,map04932,map05010,map05012,map05016,map05168,map05200	M00143,M00379,M00380,M00381,M00382,M00385,M00386,M00387,M00407,M00411	R11945	RC00061	ko00000,ko00001,ko00002,ko01000,ko03400,ko04121,ko04147	3.D.1.6			Eukaryota	3ZBCI@5878,COG1905@1,KOG3196@2759	NA|NA|NA	C
g|tr|g404235.t1	Foraminifera	296	1	GloG15_CONTIG126397:142-599,794-1068,1140-1759(+)	AKT3	Extension to Ser/Thr-type protein kinases	31591.9	50563.3	111929	65222.2	24882.9	37319.1	53764.2	66359.2	42681	85700.9	77964.3	199195	66758.2	69264	56804	63869.4	>g|tr|g404235.t1	5759.rna_EHI_138540-1	3e-09	70.1	Amoebozoa	GO:0000002,GO:0000003,GO:0000060,GO:0000079,GO:0000166,GO:0000271,GO:0000302,GO:0000768,GO:0001101,GO:0001503,GO:0001505,GO:0001558,GO:0001568,GO:0001649,GO:0001666,GO:0001667,GO:0001701,GO:0001726,GO:0001776,GO:0001890,GO:0001892,GO:0001893,GO:0001894,GO:0001932,GO:0001933,GO:0001934,GO:0001936,GO:0001938,GO:0001944,GO:0002028,GO:0002237,GO:0002260,GO:0002376,GO:0002682,GO:0002684,GO:0002694,GO:…	2.7.1.37,2.7.11.1,2.7.11.11	ko:K00870,ko:K04345,ko:K04456,ko:K08286	ko01521,ko01522,ko01524,ko04010,ko04012,ko04014,ko04015,ko04020,ko04022,ko04024,ko04062,ko04066,ko04068,ko04071,ko04072,ko04113,ko04114,ko04138,ko04140,ko04150,ko04151,ko04152,ko04210,ko04211,ko04212,ko04213,ko04218,ko04261,ko04270,ko04310,ko04340,ko04341,ko04370,ko04371,ko04380,ko04510,ko04530,ko04540,ko04550,ko04611,ko04620,ko04630,ko04660,ko04662,ko04664,ko04666,ko04668,ko04713,ko04714,ko04720…	M00676,M00695			ko00000,ko00001,ko00002,ko01000,ko01001,ko03019,ko03036				Eukaryota	3XIGT@554915,COG0515@1,KOG0690@2759	NA|NA|NA	T
g|tr|g404405.t1	Foraminifera	461	2	GloG15_CONTIG126510:813-1880(-)	LTA4H	Leukotriene A-4 hydrolase	3.20095e+06	3.44734e+06	3.01361e+06	3.34527e+06	2.89585e+06	3.86001e+06	2.14406e+06	3.77766e+06	4.01288e+06	3.38034e+06	3.85396e+06	3.35717e+06	3.12766e+06	3.95365e+06	4.93898e+06	3.09363e+06	>g|tr|g404405.t1	45351.EDO33493	6.6e-76	291.2	Metazoa	GO:0001676,GO:0001775,GO:0002252,GO:0002263,GO:0002274,GO:0002275,GO:0002283,GO:0002366,GO:0002376,GO:0002443,GO:0002444,GO:0002446,GO:0003674,GO:0003824,GO:0004177,GO:0004301,GO:0004463,GO:0005488,GO:0005575,GO:0005576,GO:0005622,GO:0005623,GO:0005634,GO:0005654,GO:0005737,GO:0005829,GO:0006082,GO:0006508,GO:0006518,GO:0006629,GO:0006631,GO:0006633,GO:0006690,GO:0006691,GO:0006807,GO:0006810,GO:…	3.3.2.6	ko:K01254	ko00590,ko01100,map00590,map01100		R03057	RC00838	ko00000,ko00001,ko01000,ko01002				Metazoa	38DQ5@33154,3BF5Y@33208,COG0308@1,KOG1047@2759	NA|NA|NA	EIOV
g|tr|g404688.t1	Foraminifera	639	1	GloG15_CONTIG126718:28-871(-)		Belongs to the 3-hydroxyisobutyrate dehydrogenase family	568415	542913	347787	428199	605670	534525	643333	465049	500480	435779	376988	437188	499631	553258	521056	484746	>g|tr|g404688.t1	28583.AMAG_16150T0	6.6e-63	247.7	Fungi		1.1.1.31	ko:K00020	ko00280,ko01100,map00280,map01100		R05066	RC00099	ko00000,ko00001,ko01000				Fungi	38F1G@33154,3NXN5@4751,COG2084@1,KOG0409@2759	NA|NA|NA	I
g|tr|g405527.t1	Foraminifera	204	13	GloG15_CONTIG127293:1-1569(+)	PCK1	Phosphoenolpyruvate carboxykinase	776457	2.1226e+06	866264	1.68975e+06	1.5343e+06	1.46208e+06	1.05091e+06	1.87582e+06	1.41577e+06	1.68503e+06	1.44151e+06	1.55668e+06	1.70625e+06	1.96524e+06	1.50443e+06	1.91325e+06	>g|tr|g405527.t1	272952.HpaP806595	2.7e-187	661.8	Peronosporales	GO:0003674,GO:0003824,GO:0004611,GO:0004612,GO:0005575,GO:0005622,GO:0005623,GO:0005737,GO:0005829,GO:0005975,GO:0005996,GO:0006006,GO:0006082,GO:0006083,GO:0006094,GO:0008150,GO:0008152,GO:0009058,GO:0009987,GO:0015976,GO:0016051,GO:0016829,GO:0016830,GO:0016831,GO:0016999,GO:0017144,GO:0019318,GO:0019319,GO:0019752,GO:0032787,GO:0043436,GO:0044237,GO:0044238,GO:0044281,GO:0044283,GO:0044424,GO:…	4.1.1.49	ko:K01610	ko00010,ko00020,ko00620,ko00710,ko01100,ko01110,ko01120,ko01130,ko01200,map00010,map00020,map00620,map00710,map01100,map01110,map01120,map01130,map01200	M00003,M00170	R00341	RC00002,RC02741	ko00000,ko00001,ko00002,ko01000				Eukaryota	2QQI5@2759,3QD8C@4776,COG1866@1	NA|NA|NA	G
g|tr|g407113.t1	Foraminifera	797	5	GloG15_CONTIG128370:286-299,377-704,789-1133(+)		Eukaryotic initiation factor 4E	1.42112e+06	1.0537e+06	947669	943409	1.13634e+06	1.01792e+06	889946	1.41836e+06	1.59233e+06	1.14149e+06	700748	824289	990921	1.00317e+06	1.42631e+06	1.10579e+06	>g|tr|g407113.t1	4792.ETI31839	4.5e-46	191.4	Peronosporales			ko:K03259	ko01521,ko03013,ko04066,ko04150,ko04151,ko04211,ko04910,map01521,map03013,map04066,map04150,map04151,map04211,map04910	M00428			ko00000,ko00001,ko00002,ko03012,ko03019				Eukaryota	3QBXN@4776,COG5053@1,KOG1669@2759	NA|NA|NA	J
g|tr|g407858.t1	Foraminifera	1062	2	GloG15_CONTIG128877:1334-1765(-)		calmodulin	576921	612336	378982	547482	493736	554411	631121	525410	508714	422319	234898	230372	402718	260683	1.05244e+06	378742	>g|tr|g407858.t1	36080.S2IY72	8.6e-11	73.6	Fungi	GO:0000003,GO:0000212,GO:0000226,GO:0000278,GO:0000280,GO:0000935,GO:0003006,GO:0003674,GO:0005488,GO:0005509,GO:0005575,GO:0005622,GO:0005623,GO:0005737,GO:0005815,GO:0005816,GO:0005823,GO:0005856,GO:0005937,GO:0006996,GO:0007010,GO:0007017,GO:0007049,GO:0007051,GO:0007052,GO:0008104,GO:0008150,GO:0009653,GO:0009987,GO:0010927,GO:0015629,GO:0015630,GO:0016043,GO:0016459,GO:0016461,GO:0019953,GO:…		ko:K02183	ko04014,ko04015,ko04016,ko04020,ko04022,ko04024,ko04070,ko04114,ko04218,ko04261,ko04270,ko04371,ko04626,ko04713,ko04720,ko04722,ko04728,ko04740,ko04744,ko04745,ko04750,ko04910,ko04912,ko04915,ko04916,ko04921,ko04922,ko04924,ko04925,ko04970,ko04971,ko05010,ko05031,ko05034,ko05133,ko05152,ko05167,ko05200,ko05214,ko05418,map04014,map04015,map04016,map04020,map04022,map04024,map04070,map04114,map0421…				ko00000,ko00001,ko01009,ko03036,ko04131,ko04147				Fungi	38ETU@33154,3NVWG@4751,COG5126@1,KOG0027@2759	NA|NA|NA	T
g|tr|g408155.t1	Foraminifera	227	1	GloG15_CONTIG129095:370-1849,1913-1947(+)	gcvP	The glycine cleavage system catalyzes the degradation of glycine. The P protein binds the alpha-amino group of glycine through its pyridoxal phosphate cofactor	24223.6	71561.5	104353	38676.2	46841.2	123643	365627	15543.9	14602.8	72283.3	76100	10756.2	203201	8797.03	11074.7	14091.9	>g|tr|g408155.t1	90814.KL370891_gene740	2.8e-120	439.1	Thiotrichales	GO:0005575,GO:0005618,GO:0005623,GO:0005886,GO:0008150,GO:0016020,GO:0030312,GO:0040007,GO:0044464,GO:0071944	1.4.4.2	ko:K00281,ko:K00282	ko00260,ko00630,ko01100,ko01110,ko01130,ko01200,map00260,map00630,map01100,map01110,map01130,map01200	M00532	R01221,R03425	RC00022,RC00929,RC02834,RC02880	ko00000,ko00001,ko00002,ko01000				Bacteria	1MUDP@1224,1RND3@1236,45ZVJ@72273,COG0403@1,COG0403@2,COG1003@1,COG1003@2	NA|NA|NA	E
g|tr|g408522.t1	Foraminifera	911	1	GloG15_CONTIG129347:1-591(-)	AP3S1	anterograde synaptic vesicle transport	126727	220370	490885	226131	156016	310265	418862	206235	157402	162356	230483	95706.2	249139	130104	174420	180025	>g|tr|g408522.t1	192875.XP_004363455.1	4.5e-42	177.9	Opisthokonta	GO:0003674,GO:0005215,GO:0005575,GO:0005622,GO:0005623,GO:0005737,GO:0005794,GO:0005802,GO:0006605,GO:0006623,GO:0006725,GO:0006726,GO:0006727,GO:0006810,GO:0006886,GO:0006892,GO:0006896,GO:0006928,GO:0006996,GO:0007017,GO:0007018,GO:0007033,GO:0007034,GO:0007040,GO:0007154,GO:0007165,GO:0007166,GO:0007167,GO:0007169,GO:0008055,GO:0008088,GO:0008089,GO:0008104,GO:0008150,GO:0008152,GO:0008286,GO:…		ko:K12399	ko04142,map04142				ko00000,ko00001,ko04131				Opisthokonta	38T6J@33154,COG5030@1,KOG0936@2759	NA|NA|NA	U
g|tr|g408523.t1	Foraminifera	475	4	GloG15_CONTIG129347:742-1308,1400-1828,1896-1945(+)	DYNC1LI2	1, light intermediate chain	114452	274546	247658	241474	251747	175440	223570	200315	140190	264690	217282	206251	293522	199558	121422	189063	>g|tr|g408523.t1	144197.XP_008291038.1	7.7e-21	108.2	Actinopterygii	GO:0000003,GO:0000226,GO:0000775,GO:0000776,GO:0000902,GO:0000904,GO:0002376,GO:0002478,GO:0002495,GO:0002504,GO:0003006,GO:0003674,GO:0005488,GO:0005515,GO:0005575,GO:0005622,GO:0005623,GO:0005694,GO:0005737,GO:0005813,GO:0005815,GO:0005829,GO:0005856,GO:0005868,GO:0005874,GO:0005875,GO:0006403,GO:0006810,GO:0006888,GO:0006928,GO:0006996,GO:0007010,GO:0007017,GO:0007018,GO:0007275,GO:0007276,GO:…		ko:K10416	ko04145,ko04962,ko05132,map04145,map04962,map05132				ko00000,ko00001,ko03036,ko04131,ko04812				Metazoa	38EM3@33154,3BFMD@33208,3CU3J@33213,4863R@7711,490Z4@7742,49Q32@7898,KOG3905@1,KOG3905@2759	NA|NA|NA	N
g|tr|g408929.t1	Foraminifera	727	7	GloG15_CONTIG129622:887-915,972-1178,1241-1763(+)	PSMB4	threonine-type endopeptidase activity	906316	905298	846155	752847	823659	1.07965e+06	982706	926680	1.35224e+06	919452	494587	737773	1.09217e+06	913799	1.24227e+06	1.14693e+06	>g|tr|g408929.t1	653948.CCA18172	6.1e-52	211.1	Eukaryota	GO:0000226,GO:0000502,GO:0001530,GO:0002682,GO:0002683,GO:0002861,GO:0002862,GO:0003674,GO:0003824,GO:0005488,GO:0005575,GO:0005622,GO:0005623,GO:0005634,GO:0005654,GO:0005737,GO:0005783,GO:0005789,GO:0005829,GO:0005839,GO:0005840,GO:0006464,GO:0006508,GO:0006511,GO:0006807,GO:0006950,GO:0006970,GO:0006996,GO:0007010,GO:0007017,GO:0007049,GO:0007088,GO:0007098,GO:0007346,GO:0008150,GO:0008152,GO:…	1.3.1.88,3.4.25.1	ko:K02736,ko:K05542,ko:K18740	ko03050,map03050	M00337,M00340			ko00000,ko00001,ko00002,ko01000,ko01002,ko03016,ko03019,ko03051				Eukaryota	KOG0185@1,KOG0185@2759	NA|NA|NA	O
g|tr|g409177.t1	Foraminifera	977	6	GloG15_CONTIG129797:1164-1688(-)		Insulinase (Peptidase family M16)	819008	1.17915e+06	1.00676e+06	946162	1.05193e+06	1.79832e+06	2.40429e+06	770762	805591	687057	832660	1.52011e+06	1.29515e+06	793906	969914	1.00451e+06	>g|tr|g409177.t1	12957.ACEP27125-PA	1.3e-32	146.4	Hymenoptera	GO:0003674,GO:0003824,GO:0004175,GO:0004222,GO:0005488,GO:0005575,GO:0005622,GO:0005623,GO:0005737,GO:0005739,GO:0005740,GO:0005743,GO:0005759,GO:0006508,GO:0006605,GO:0006626,GO:0006627,GO:0006807,GO:0006810,GO:0006839,GO:0006886,GO:0006996,GO:0007005,GO:0008104,GO:0008150,GO:0008152,GO:0008233,GO:0008237,GO:0008270,GO:0009987,GO:0010467,GO:0015031,GO:0015833,GO:0016020,GO:0016043,GO:0016485,GO:…	3.4.24.64	ko:K01412					ko00000,ko01000,ko01002,ko03029				Arthropoda	38BUY@33154,3BCWV@33208,3CTJF@33213,3SGQV@50557,41UTW@6656,46HHZ@7399,COG0612@1,KOG2067@2759	NA|NA|NA	O
g|tr|g409647.t1	Foraminifera	956	1	GloG15_CONTIG130127:131-490,554-742(-)	OST3	protein N-linked glycosylation via asparagine	388556	579664	362379	513561	271343	756307	310235	310927	450177	408910	96122.6	189674	294634	441968	734866	575499	>g|tr|g409647.t1	227086.JGI_V11_138803	2.7e-09	68.9	Eukaryota	GO:0000003,GO:0003674,GO:0003824,GO:0004576,GO:0004579,GO:0005575,GO:0005622,GO:0005623,GO:0005737,GO:0005783,GO:0005789,GO:0005886,GO:0006464,GO:0006486,GO:0006487,GO:0006493,GO:0006807,GO:0008150,GO:0008152,GO:0008250,GO:0009058,GO:0009059,GO:0009100,GO:0009101,GO:0009507,GO:0009536,GO:0009856,GO:0009987,GO:0010483,GO:0012505,GO:0016020,GO:0016021,GO:0016740,GO:0016757,GO:0016758,GO:0018193,GO:…		ko:K12669,ko:K19478	ko00510,ko00513,ko01100,ko04141,map00510,map00513,map01100,map04141	M00072			ko00000,ko00001,ko00002,ko02000	9.A.45.1.1,9.A.45.1.2,9.A.45.1.3,9.A.45.1.4,9.A.45.1.6			Eukaryota	KOG2603@1,KOG2603@2759	NA|NA|NA	I
g|tr|g411634.t1	Foraminifera	1079	1	GloG15_CONTIG131500:582-779,856-974,1034-1130(-)	CORO7	DUF1899	37226.6	69603.3	28699.7	16581.2	59877.5	75563.7	42992.6	21304.8	51311.9	27706.2	40779.6	0	21722.7	30605.7	50002.7	74437	>g|tr|g411634.t1	28737.XP_006897536.1	7.8e-09	67.0	Afrotheria	GO:0003674,GO:0003779,GO:0005488,GO:0005515,GO:0005575,GO:0005622,GO:0005623,GO:0005737,GO:0005794,GO:0005802,GO:0006810,GO:0006892,GO:0006895,GO:0006928,GO:0006996,GO:0007010,GO:0007015,GO:0007030,GO:0007163,GO:0008092,GO:0008150,GO:0008154,GO:0009987,GO:0010256,GO:0012505,GO:0016020,GO:0016021,GO:0016043,GO:0016192,GO:0016477,GO:0016482,GO:0022607,GO:0030010,GO:0030029,GO:0030036,GO:0030041,GO:…		ko:K18619					ko00000,ko04812				Mammalia	34TJI@311790,38BDH@33154,3BEK1@33208,3CZP8@33213,3JEJR@40674,4816V@7711,491V2@7742,KOG1445@1,KOG1445@2759,KOG3442@1,KOG3442@2759	NA|NA|NA	Z
g|tr|g414037.t1	Foraminifera	313	6	GloG15_CONTIG133201:175-228,292-654,728-1630(+)		succinate-CoA ligase (ADP-forming) activity	2.21254e+06	3.44747e+06	2.40745e+06	3.23345e+06	3.26716e+06	4.73055e+06	4.83695e+06	2.49737e+06	2.84354e+06	3.36656e+06	2.683e+06	2.0957e+06	4.43755e+06	2.29764e+06	3.36835e+06	3.43591e+06	>g|tr|g414037.t1	227086.JGI_V11_92245	1.9e-117	429.5	Eukaryota		2.3.1.7,2.7.11.18,6.2.1.4,6.2.1.5,6.2.1.9	ko:K00624,ko:K00907,ko:K01899,ko:K01900,ko:K02948,ko:K14067	ko00020,ko00630,ko00640,ko00680,ko01100,ko01110,ko01120,ko01130,ko01200,ko03010,ko04020,ko04022,ko04146,ko04270,ko04371,ko04510,ko04611,ko04810,ko04921,ko04971,map00020,map00630,map00640,map00680,map01100,map01110,map01120,map01130,map01200,map03010,map04020,map04022,map04146,map04270,map04371,map04510,map04611,map04810,map04921,map04971	M00009,M00011,M00178,M00179,M00346	R00432,R00727,R01256,R02396	RC00004,RC00014,RC00037	br01610,ko00000,ko00001,ko00002,ko01000,ko01001,ko03011,ko04147				Eukaryota	COG0045@1,KOG2799@2759	NA|NA|NA	C
g|tr|g414305.t1	Foraminifera	194	3	GloG15_CONTIG133388:69-565,645-908,1010-1548,1616-1908(+)	FTSH3	ATP-dependent zinc metalloprotease FTSH 10, mitochondrial-like	40179.8	181118	427498	155769	110973	72731	166102	87039.7	143303	171017	53095.5	7948.52	258041	84869.9	60153.8	89462.8	>g|tr|g414305.t1	102107.XP_008240759.1	1.4e-127	463.4	fabids			ko:K08956					ko00000,ko01000,ko01002,ko03110				Viridiplantae	37IFQ@33090,3GE5T@35493,4JNBT@91835,COG0465@1,KOG0731@2759	NA|NA|NA	O
g|tr|g415146.t1	Foraminifera	1006	1	GloG15_CONTIG133980:496-609,705-978,1041-1144,1200-1202(-)	RPS15	ribosomal small subunit assembly	142365	462053	475067	530376	540523	359252	885536	187558	183470	496711	274091	392770	801690	275106	98238.9	236349	>g|tr|g415146.t1	44056.XP_009040623.1	1.9e-46	192.2	Eukaryota			ko:K02958	ko03010,map03010	M00177			br01610,ko00000,ko00001,ko00002,ko03011				Eukaryota	COG0185@1,KOG0898@2759	NA|NA|NA	J
g|tr|g415888.t1	Foraminifera	236	3	GloG15_CONTIG134509:223-745,892-1862(-)	DPP7	dipeptidyl-peptidase activity	2.22095e+06	937474	1.12638e+06	941320	1.37244e+06	605346	694619	2.43563e+06	1.26721e+06	1.10333e+06	1.11051e+06	538457	938281	1.20731e+06	894572	900588	>g|tr|g415888.t1	45351.EDO48107	3.1e-108	399.1	Metazoa	GO:0000323,GO:0001775,GO:0002252,GO:0002263,GO:0002274,GO:0002275,GO:0002283,GO:0002366,GO:0002376,GO:0002443,GO:0002444,GO:0002446,GO:0003674,GO:0003824,GO:0004177,GO:0005575,GO:0005576,GO:0005622,GO:0005623,GO:0005737,GO:0005764,GO:0005766,GO:0005773,GO:0005775,GO:0005794,GO:0005829,GO:0006508,GO:0006807,GO:0006810,GO:0006887,GO:0006955,GO:0008150,GO:0008152,GO:0008233,GO:0008236,GO:0008238,GO:…	3.4.14.2,3.4.16.2	ko:K01276,ko:K01285	ko04614,ko04974,map04614,map04974				ko00000,ko00001,ko01000,ko01002				Metazoa	39TIR@33154,3BGHY@33208,KOG2183@1,KOG2183@2759	NA|NA|NA	O
g|tr|g416537.t1	Foraminifera	205	27	GloG15_CONTIG134988:218-1330,1396-1851(-)		regulation of syncytium formation by plasma membrane fusion	1.02934e+06	791675	558153	858203	823846	798494	711111	1.16262e+06	1.1364e+06	918624	787912	462613	753562	1.01123e+06	983312	1.0312e+06	>g|tr|g416537.t1	6326.BUX.s00351.345	1.2e-206	726.1	Chromadorea	GO:0001666,GO:0003674,GO:0003824,GO:0005215,GO:0006810,GO:0006811,GO:0006812,GO:0006873,GO:0006885,GO:0006950,GO:0007155,GO:0008150,GO:0008219,GO:0008324,GO:0009628,GO:0009987,GO:0010941,GO:0010942,GO:0015075,GO:0015077,GO:0015078,GO:0015318,GO:0015399,GO:0015405,GO:0015672,GO:0015988,GO:0016462,GO:0016787,GO:0016817,GO:0016818,GO:0016887,GO:0017111,GO:0019725,GO:0019829,GO:0022603,GO:0022610,GO:…		ko:K02147	ko00190,ko01100,ko04145,ko04150,ko04721,ko04966,ko05110,ko05120,ko05323,map00190,map01100,map04145,map04150,map04721,map04966,map05110,map05120,map05323	M00160			ko00000,ko00001,ko00002,ko04147	3.A.2.2			Nematoda	1KVAA@119089,38F6K@33154,3BBZN@33208,3CVY1@33213,40B9Y@6231,COG1156@1,KOG1351@2759	NA|NA|NA	C
g|tr|g416933.t1	Foraminifera	214	58	GloG15_CONTIG135266:1-394,519-1251,1326-1578,1663-1817(-)	HSPA5	ATP binding	1.12271e+06	2.46656e+06	1.18675e+06	2.0092e+06	2.14994e+06	2.31722e+06	3.4578e+06	2.2973e+06	1.99232e+06	2.65261e+06	2.10105e+06	1.7271e+06	3.31533e+06	1.98681e+06	1.96925e+06	2.61788e+06	>g|tr|g416933.t1	227086.JGI_V11_88281	5.5e-217	760.4	Eukaryota	GO:0000003,GO:0000082,GO:0000166,GO:0000271,GO:0000278,GO:0000323,GO:0000741,GO:0000742,GO:0000746,GO:0000747,GO:0000974,GO:0001085,GO:0001655,GO:0001664,GO:0001822,GO:0001910,GO:0001912,GO:0001914,GO:0001916,GO:0001917,GO:0002682,GO:0002684,GO:0002697,GO:0002699,GO:0002703,GO:0002705,GO:0002706,GO:0002708,GO:0002709,GO:0002711,GO:0002819,GO:0002821,GO:0002822,GO:0002824,GO:0003008,GO:0003674,GO:…		ko:K09490	ko03060,ko04141,ko04918,ko05020,map03060,map04141,map04918,map05020				ko00000,ko00001,ko03110,ko04131,ko04147	1.A.33			Eukaryota	COG0443@1,KOG0100@2759	NA|NA|NA	O
g|tr|g418508.t1	Foraminifera	1121	1	GloG15_CONTIG136387:1497-1538,1613-1883(+)	SSC1	Belongs to the heat shock protein 70 family	85213.9	570054	145687	660197	687813	635854	953660	447931	327188	775271	303891	55540.7	863547	269111	308047	574420	>g|tr|g418508.t1	4952.CAG82260	2.1e-22	111.7	Saccharomycetes	GO:0001405,GO:0003674,GO:0003824,GO:0005488,GO:0005515,GO:0005575,GO:0005576,GO:0005618,GO:0005622,GO:0005623,GO:0005737,GO:0005739,GO:0005740,GO:0005743,GO:0005744,GO:0005759,GO:0005886,GO:0006457,GO:0006605,GO:0006626,GO:0006790,GO:0006810,GO:0006839,GO:0006886,GO:0006950,GO:0006970,GO:0006996,GO:0007005,GO:0008104,GO:0008150,GO:0008152,GO:0009277,GO:0009295,GO:0009628,GO:0009847,GO:0009893,GO:…		ko:K04043	ko03018,ko04212,ko05152,map03018,map04212,map05152				ko00000,ko00001,ko03019,ko03029,ko03110,ko04147	1.A.33.1			Fungi	38EJA@33154,3NVS1@4751,3QP9J@4890,3RRB8@4891,COG0443@1,KOG0102@2759	NA|NA|NA	O
g|tr|g420226.t1	Foraminifera	560	1	GloG15_CONTIG137626:489-1102,1157-1457,1526-1552(-)	DECR2	2,4-dienoyl-CoA reductase (NADPH) activity	28043	73988.9	13514.5	48278.2	115488	130528	271545	76324.9	66375.7	110363	91624.3	596.726	254748	119746	997.186	153555	>g|tr|g420226.t1	7719.XP_002131655.1	4.6e-73	281.6	Chordata	GO:0003674,GO:0003824,GO:0005102,GO:0005488,GO:0005515,GO:0005575,GO:0005622,GO:0005623,GO:0005737,GO:0005777,GO:0005778,GO:0005829,GO:0006082,GO:0006605,GO:0006625,GO:0006629,GO:0006631,GO:0006633,GO:0006635,GO:0006636,GO:0006810,GO:0006886,GO:0006996,GO:0007031,GO:0008104,GO:0008150,GO:0008152,GO:0008610,GO:0008670,GO:0009056,GO:0009058,GO:0009062,GO:0009987,GO:0015031,GO:0015833,GO:0016020,GO:…	1.3.1.34	ko:K13237	ko04146,map04146				ko00000,ko00001,ko01000				Metazoa	3905U@33154,3BAN7@33208,3CWXE@33213,486IW@7711,COG1028@1,KOG0725@2759	NA|NA|NA	Q
g|tr|g420583.t1	Foraminifera	825	2	GloG15_CONTIG137877:35-689(-)		Protein kinase domain containing protein	23053.8	100023	113553	112629	148145	63865.6	110761	88823.5	82261.6	257346	39290.5	79652.9	154327	57654.1	27791	103609	>g|tr|g420583.t1	5911.EAR83724	4.1e-20	105.1	Ciliophora		2.7.11.1	ko:K13303	ko04068,ko04151,map04068,map04151				ko00000,ko00001,ko01000,ko01001				Eukaryota	3ZAXG@5878,KOG0598@1,KOG0598@2759	NA|NA|NA	T
g|tr|g420784.t1	Foraminifera	674	2	GloG15_CONTIG138024:488-1294(+)		Glutamate/Leucine/Phenylalanine/Valine dehydrogenase	2.18192e+06	2.42601e+06	720045	2.04292e+06	2.41434e+06	1.6255e+06	1.15501e+06	3.46547e+06	2.46126e+06	1.48351e+06	690291	125699	1.37559e+06	3.16142e+06	1.57908e+06	1.31758e+06	>g|tr|g420784.t1	7719.XP_009858550.1	3.4e-77	295.0	Chordata		1.4.1.3,1.4.1.4	ko:K00261,ko:K00262	ko00220,ko00250,ko00471,ko00910,ko01100,ko01200,ko04217,ko04964,map00220,map00250,map00471,map00910,map01100,map01200,map04217,map04964	M00740	R00243,R00248	RC00006,RC02799	ko00000,ko00001,ko00002,ko01000,ko04147				Metazoa	38GEK@33154,3BKKN@33208,3D5YW@33213,48IFU@7711,COG0334@1,KOG2250@2759	NA|NA|NA	E
g|tr|g422194.t1	Foraminifera	229	2	GloG15_CONTIG139009:1-752,816-964,1028-1634(-)	TIF1	Belongs to the DEAD box helicase family	1.56929e+06	2.17036e+06	1.51156e+06	1.65994e+06	1.82686e+06	2.45822e+06	2.98934e+06	1.59842e+06	1.52833e+06	1.63835e+06	343446	503422	1.84012e+06	900737	1.46826e+06	2.19191e+06	>g|tr|g422194.t1	109760.SPPG_00092T0	6.2e-96	358.2	Fungi	GO:0002181,GO:0002183,GO:0003674,GO:0003676,GO:0003723,GO:0003724,GO:0003743,GO:0003824,GO:0004004,GO:0004386,GO:0005488,GO:0005575,GO:0005622,GO:0005623,GO:0005634,GO:0005730,GO:0005737,GO:0005829,GO:0005840,GO:0005886,GO:0006139,GO:0006412,GO:0006413,GO:0006417,GO:0006446,GO:0006518,GO:0006725,GO:0006807,GO:0008026,GO:0008135,GO:0008150,GO:0008152,GO:0008186,GO:0009058,GO:0009059,GO:0009889,GO:…		ko:K03257	ko03013,map03013	M00428			ko00000,ko00001,ko00002,ko03012,ko03019,ko04147				Fungi	38CTS@33154,3NUYA@4751,COG0513@1,KOG0327@2759	NA|NA|NA	J
g|tr|g422200.t1	Foraminifera	747	5	GloG15_CONTIG139013:1064-1619,1683-1861(+)	FDH1	Catalyzes the NAD( )-dependent oxidation of formate to carbon dioxide. Formate oxidation is the final step in the methanol oxidation pathway in methylotrophic microorganisms. Has a role in the detoxification of exogenous formate in non- methylotrophic organisms	788504	1.23388e+06	1.52783e+06	1.10423e+06	2.50812e+06	858841	946096	883227	760854	895502	837318	395210	808440	838167	955110	677353	>g|tr|g422200.t1	4792.ETI48266	8e-65	253.8	Peronosporales	GO:0003674,GO:0003824,GO:0005575,GO:0005576,GO:0005622,GO:0005623,GO:0005737,GO:0005739,GO:0005829,GO:0006082,GO:0006083,GO:0008150,GO:0008152,GO:0008863,GO:0009056,GO:0009507,GO:0009536,GO:0009579,GO:0009987,GO:0010035,GO:0010038,GO:0015942,GO:0016054,GO:0016491,GO:0016620,GO:0016903,GO:0016999,GO:0017001,GO:0017144,GO:0019752,GO:0032787,GO:0042183,GO:0042221,GO:0042737,GO:0043226,GO:0043227,GO:…	1.17.1.9	ko:K00122	ko00630,ko00680,ko01100,ko01120,ko01200,map00630,map00680,map01100,map01120,map01200		R00519	RC02796	ko00000,ko00001,ko01000			iMM904.YOR388C,iND750.YOR388C	Eukaryota	3Q9JW@4776,COG1052@1,KOG0069@2759	NA|NA|NA	C
g|tr|g422294.t1-tr|B7FQT3|B7FQT3_PHATC(74.39%)	Both	991	5	Peptidyl-prolyl cis-trans isomerase OS=Phaeodactylum tricornutum (strain CCAP 1055/1) GN=PHATRDRAFT_43152 PE=3 SV=1		PPIases accelerate the folding of proteins. It catalyzes the cis-trans isomerization of proline imidic peptide bonds in oligopeptides	3.29652e+06	4.42875e+06	3.50082e+06	3.70032e+06	4.15511e+06	5.82897e+06	5.89047e+06	3.8296e+06	3.41933e+06	3.86933e+06	2.8586e+06	1.00956e+06	5.83672e+06	4.06745e+06	4.80243e+06	5.40789e+06	>g|tr|g422294.t1	248742.XP_005643480.1	2.2e-74	285.0	Chlorophyta		5.2.1.8	ko:K01802,ko:K03767,ko:K09565	ko01503,ko04020,ko04022,ko04217,ko05012,ko05016,ko05145,map01503,map04020,map04022,map04217,map05012,map05016,map05145				ko00000,ko00001,ko01000,ko03110,ko04147				Viridiplantae	34JBX@3041,37M44@33090,COG0652@1,KOG0865@2759	NA|NA|NA	O
g|tr|g422419.t1	Foraminifera	583	3	GloG15_CONTIG139163:31-447,511-1009(-)	PDI1	Disulfide-isomerase	1.18314e+07	1.00363e+07	9.0425e+06	9.81933e+06	8.46643e+06	1.27591e+07	1.26371e+07	9.84507e+06	1.01296e+07	9.47747e+06	7.51037e+06	9.86247e+06	1.03607e+07	1.01883e+07	1.35299e+07	9.99063e+06	>g|tr|g422419.t1	430498.S8ATE3	9.3e-55	220.7	Ascomycota	GO:0001666,GO:0003674,GO:0003756,GO:0003824,GO:0004656,GO:0005102,GO:0005178,GO:0005488,GO:0005515,GO:0005575,GO:0005576,GO:0005622,GO:0005623,GO:0005737,GO:0005783,GO:0005788,GO:0005793,GO:0005886,GO:0006082,GO:0006457,GO:0006464,GO:0006508,GO:0006511,GO:0006516,GO:0006517,GO:0006520,GO:0006575,GO:0006807,GO:0006950,GO:0007154,GO:0007165,GO:0007166,GO:0008150,GO:0008152,GO:0009056,GO:0009057,GO:…	5.3.4.1	ko:K09580	ko04141,map04141				ko00000,ko00001,ko01000,ko03110,ko04131,ko04147				Fungi	38GTB@33154,3NZ2W@4751,3QJD6@4890,COG0526@1,KOG0190@2759	NA|NA|NA	O
g|tr|g422772.t1	Foraminifera	181	10	GloG15_CONTIG139416:139-642,733-1858(+)	PAB1	RNA binding	93707.5	163808	170397	140067	213198	155066	182909	91808.2	163231	1.1188e+06	317639	161287	923706	93644.2	165024	112173	>g|tr|g422772.t1	529818.AMSG_09898T0	1.3e-94	354.0	Eukaryota	GO:0003674,GO:0003676,GO:0003682,GO:0003723,GO:0003727,GO:0003729,GO:0004857,GO:0005488,GO:0005575,GO:0005622,GO:0005623,GO:0005634,GO:0005681,GO:0005737,GO:0005840,GO:0006403,GO:0006405,GO:0006406,GO:0006417,GO:0006446,GO:0006611,GO:0006810,GO:0006886,GO:0006913,GO:0008104,GO:0008143,GO:0008150,GO:0008152,GO:0008428,GO:0009889,GO:0009894,GO:0010467,GO:0010468,GO:0010494,GO:0010556,GO:0010608,GO:…		ko:K13126	ko03013,ko03015,ko03018,map03013,map03015,map03018				ko00000,ko00001,ko03019,ko03041				Eukaryota	KOG0123@1,KOG0123@2759	NA|NA|NA	J
g|tr|g423193.t1	Foraminifera	172	3	GloG15_CONTIG139696:1-559,618-1713(-)	TPP2	Tripeptidyl peptidase II	755622	1.19258e+06	465071	914192	937433	1.31777e+06	995615	1.35984e+06	1.2138e+06	1.03809e+06	191212	116832	1.2303e+06	708437	624604	851478	>g|tr|g423193.t1	13616.ENSMODP00000007778	3.3e-111	409.1	Metatheria	GO:0000209,GO:0003674,GO:0003824,GO:0004175,GO:0004177,GO:0005488,GO:0005515,GO:0005575,GO:0005622,GO:0005623,GO:0005634,GO:0005654,GO:0005737,GO:0005829,GO:0006464,GO:0006508,GO:0006807,GO:0008150,GO:0008152,GO:0008233,GO:0008236,GO:0008238,GO:0008240,GO:0009987,GO:0016567,GO:0016604,GO:0016787,GO:0017171,GO:0019538,GO:0031974,GO:0031981,GO:0032446,GO:0033218,GO:0036211,GO:0042277,GO:0042802,GO:…	3.4.14.10	ko:K01280					ko00000,ko01000,ko01002,ko03110				Mammalia	38DD3@33154,3BERN@33208,3CUIF@33213,3JBJE@40674,4861C@7711,491IE@7742,4K1A2@9263,COG1404@1,KOG1114@2759	NA|NA|NA	O
g|tr|g424090.t1	Foraminifera	234	1	GloG15_CONTIG140343:96-1595(+)		Translation initiation factor IF-2, N-terminal region	54679.7	623692	56828.5	290519	265284	177473	276177	153968	223832	323742	127459	43059.3	186812	320150	119929	220257	>g|tr|g424090.t1	112098.XP_008618564.1	7.1e-44	185.3	Eukaryota		2.7.1.68	ko:K00889	ko00562,ko01100,ko04011,ko04070,ko04072,ko04139,ko04144,ko04666,ko04810,ko05231,map00562,map01100,map04011,map04070,map04072,map04139,map04144,map04666,map04810,map05231	M00130	R03469	RC00002,RC00078	ko00000,ko00001,ko00002,ko01000,ko04131				Eukaryota	COG5253@1,KOG0229@2759	NA|NA|NA	T
g|tr|g426611.t1	Foraminifera	496	2	GloG15_CONTIG142188:614-1435,1499-1637,1713-1774(-)	KCNAB2	potassium channel regulator activity	190579	259036	298212	382779	268340	313997	88615	195189	204456	296205	275482	175081	256343	370655	336181	338328	>g|tr|g426611.t1	946362.XP_004988349.1	1e-65	257.3	Opisthokonta	GO:0000166,GO:0001775,GO:0002244,GO:0002252,GO:0002263,GO:0002274,GO:0002275,GO:0002283,GO:0002366,GO:0002376,GO:0002443,GO:0002444,GO:0002446,GO:0002520,GO:0003008,GO:0003674,GO:0003824,GO:0004033,GO:0005215,GO:0005216,GO:0005244,GO:0005249,GO:0005261,GO:0005267,GO:0005488,GO:0005515,GO:0005575,GO:0005622,GO:0005623,GO:0005737,GO:0005829,GO:0005886,GO:0005887,GO:0006139,GO:0006725,GO:0006732,GO:…		ko:K04882,ko:K04883,ko:K04884					ko00000,ko04040	8.A.5.1,8.A.5.1.1,8.A.5.1.2,8.A.5.1.3			Opisthokonta	38D0J@33154,COG0667@1,KOG1575@2759	NA|NA|NA	C
g|tr|g427729.t1	Foraminifera	273	4	GloG15_CONTIG142992:40-869,938-1491,1568-1578(-)	COPS3	protein deneddylation	645953	472975	328659	366948	500552	343850	309734	395194	541669	426978	305265	879377	529241	518190	546882	536238	>g|tr|g427729.t1	44689.DDB0233101	2.6e-40	173.3	Amoebozoa	GO:0000003,GO:0000226,GO:0000278,GO:0000281,GO:0000338,GO:0000715,GO:0000910,GO:0001701,GO:0002009,GO:0003006,GO:0003674,GO:0005488,GO:0005515,GO:0005575,GO:0005622,GO:0005623,GO:0005634,GO:0005654,GO:0005737,GO:0005829,GO:0006139,GO:0006259,GO:0006281,GO:0006283,GO:0006289,GO:0006464,GO:0006508,GO:0006511,GO:0006725,GO:0006807,GO:0006950,GO:0006974,GO:0006996,GO:0007010,GO:0007017,GO:0007049,GO:…		ko:K00413,ko:K12177	ko00190,ko01100,ko02020,ko04260,ko04714,ko04932,ko05010,ko05012,ko05016,map00190,map01100,map02020,map04260,map04714,map04932,map05010,map05012,map05016	M00151,M00152			ko00000,ko00001,ko00002,ko04121				Eukaryota	3X9F5@554915,KOG2582@1,KOG2582@2759	NA|NA|NA	OT
g|tr|g427769.t1	Foraminifera	754	3	GloG15_CONTIG143021:567-1061,1119-1355(-)			1.45115e+06	1.77656e+06	1.55148e+06	1.68389e+06	1.3981e+06	3.52892e+06	3.20203e+06	914681	1.2131e+06	1.25675e+06	688290	264632	2.52006e+06	867902	1.95693e+06	1.43109e+06
g|tr|g428067.t1	Foraminifera	1139	3	GloG15_CONTIG143234:549-661,738-780,843-953(-)			94279.9	89931.7	85465.5	89222.1	75116.7	135000	137936	45988.8	131241	82473.3	75711	77124	144251	76553.2	113113	106265
g|tr|g429171.t1	Foraminifera	649	8	GloG15_CONTIG144044:1-461,519-883(-)	TM9SF4	positive regulation of protein exit from endoplasmic reticulum	610520	1.22968e+06	992356	1.01009e+06	913305	751551	541729	762493	828761	961305	1.11008e+06	1.90392e+06	955061	1.29915e+06	1.03277e+06	1.12154e+06	>g|tr|g429171.t1	227086.JGI_V11_53402	5.4e-62	244.6	Eukaryota	GO:0000003,GO:0001666,GO:0002252,GO:0002376,GO:0002790,GO:0002831,GO:0002832,GO:0003674,GO:0004888,GO:0005575,GO:0005622,GO:0005623,GO:0005737,GO:0005768,GO:0005769,GO:0005794,GO:0005886,GO:0005887,GO:0006810,GO:0006873,GO:0006885,GO:0006897,GO:0006909,GO:0006950,GO:0006952,GO:0006996,GO:0007033,GO:0007035,GO:0007040,GO:0007042,GO:0007154,GO:0007155,GO:0007165,GO:0008104,GO:0008150,GO:0008152,GO:…		ko:K17086					ko00000,ko04147				Eukaryota	KOG1278@1,KOG1278@2759	NA|NA|NA	S
g|tr|g429172.t1	Foraminifera	757	3	GloG15_CONTIG144044:1027-1335,1405-1821(+)		malyl-CoA lyase activity	43133	225548	158778	164128	175362	145235	224199	171485	105784	244391	78913	197996	249309	99928.4	89498.8	100441	>g|tr|g429172.t1	227086.JGI_V11_80542	6.8e-24	117.9	Eukaryota												Eukaryota	2QWRT@2759,COG2301@1	NA|NA|NA	G
g|tr|g431563.t1	Foraminifera	1045	1	GloG15_CONTIG145797:1-451(+)	ARL2	GTP binding	67580.1	63222.1	33708.8	56444.2	106624	150090	187795	76666.1	39277.1	80246.2	4118.68	120688	67586.7	61211.7	116769	67982.5	>g|tr|g431563.t1	227086.JGI_V11_57035	2.1e-52	211.8	Eukaryota	GO:0000003,GO:0000132,GO:0000166,GO:0000226,GO:0000278,GO:0000281,GO:0000910,GO:0001505,GO:0001882,GO:0001883,GO:0002090,GO:0002791,GO:0003006,GO:0003674,GO:0003824,GO:0003924,GO:0004857,GO:0005095,GO:0005488,GO:0005525,GO:0005575,GO:0005622,GO:0005623,GO:0005634,GO:0005730,GO:0005737,GO:0005739,GO:0005740,GO:0005758,GO:0005759,GO:0005794,GO:0005813,GO:0005815,GO:0005818,GO:0005819,GO:0005829,GO:…		ko:K07943,ko:K21596					ko00000,ko03000,ko03036,ko04031				Eukaryota	KOG0073@1,KOG0073@2759	NA|NA|NA	J
g|tr|g435029.t1	Foraminifera	866	5	GloG15_CONTIG148367:891-1133,1196-1576(-)	RAB21	RAB21, member RAS oncogene family	294187	300213	142519	257194	221775	234561	175318	381491	387213	350590	87416.9	44104.3	199396	258436	397423	269418	>g|tr|g435029.t1	10224.XP_002737035.1	1.9e-59	235.7	Bilateria	GO:0000139,GO:0000166,GO:0001558,GO:0001882,GO:0001883,GO:0003674,GO:0003824,GO:0003924,GO:0005488,GO:0005515,GO:0005525,GO:0005575,GO:0005622,GO:0005623,GO:0005737,GO:0005768,GO:0005769,GO:0005794,GO:0005795,GO:0005802,GO:0005829,GO:0005886,GO:0006810,GO:0006928,GO:0006996,GO:0007010,GO:0007017,GO:0007018,GO:0007154,GO:0007165,GO:0007264,GO:0007265,GO:0007275,GO:0007399,GO:0008088,GO:0008089,GO:…		ko:K07890					ko00000,ko04031,ko04131,ko04147				Metazoa	38ECK@33154,3B9SU@33208,3CYXB@33213,KOG0088@1,KOG0088@2759	NA|NA|NA	U
g|tr|g436610.t1	Foraminifera	624	4	GloG15_CONTIG149522:1-31,86-235,303-717,938-997,1059-1134,1191-1327(-)	pckG	Catalyzes the conversion of oxaloacetate (OAA) to phosphoenolpyruvate (PEP), the rate-limiting step in the metabolic pathway that produces glucose from lactate and other precursors derived from the citric acid cycle	483093	814177	398059	725019	967545	815747	1.35682e+06	1.17453e+06	853701	979496	300708	318466	823389	877177	473990	586628	>g|tr|g436610.t1	716544.wcw_1593	4e-108	397.9	Chlamydiae	GO:0000003,GO:0001655,GO:0001822,GO:0001889,GO:0003006,GO:0003674,GO:0003676,GO:0003723,GO:0003729,GO:0003824,GO:0004457,GO:0004611,GO:0004613,GO:0005488,GO:0005575,GO:0005576,GO:0005618,GO:0005622,GO:0005623,GO:0005737,GO:0005739,GO:0005759,GO:0005829,GO:0005886,GO:0005975,GO:0005996,GO:0006006,GO:0006007,GO:0006066,GO:0006071,GO:0006082,GO:0006089,GO:0006090,GO:0006091,GO:0006094,GO:0006109,GO:…	4.1.1.32,4.1.1.49	ko:K01596,ko:K01610	ko00010,ko00020,ko00620,ko00710,ko01100,ko01110,ko01120,ko01130,ko01200,ko03320,ko04068,ko04151,ko04152,ko04910,ko04920,ko04922,ko04931,ko04964,map00010,map00020,map00620,map00710,map01100,map01110,map01120,map01130,map01200,map03320,map04068,map04151,map04152,map04910,map04920,map04922,map04931,map04964	M00003,M00170	R00341,R00431,R00726	RC00002,RC02741	ko00000,ko00001,ko00002,ko01000			iAF987.Gmet_2638	Bacteria	2JFEW@204428,COG1274@1,COG1274@2	NA|NA|NA	F
g|tr|g437736.t1	Foraminifera	1031	2	GloG15_CONTIG150341:394-811,867-910(+)		Calmodulin	1.9849e+06	1.40608e+06	1.56642e+06	1.42355e+06	1.61394e+06	1.68862e+06	2.29027e+06	1.44848e+06	2.11791e+06	1.20851e+06	2.98071e+06	1.517e+06	1.93756e+06	1.84193e+06	2.12605e+06	1.65848e+06	>g|tr|g437736.t1	5865.XP_001609057.1	7.3e-32	143.7	Piroplasmida			ko:K02183	ko04014,ko04015,ko04016,ko04020,ko04022,ko04024,ko04070,ko04114,ko04218,ko04261,ko04270,ko04371,ko04626,ko04713,ko04720,ko04722,ko04728,ko04740,ko04744,ko04745,ko04750,ko04910,ko04912,ko04915,ko04916,ko04921,ko04922,ko04924,ko04925,ko04970,ko04971,ko05010,ko05031,ko05034,ko05133,ko05152,ko05167,ko05200,ko05214,ko05418,map04014,map04015,map04016,map04020,map04022,map04024,map04070,map04114,map0421…				ko00000,ko00001,ko01009,ko03036,ko04131,ko04147				Apicomplexa	3KAM6@422676,3Y9ZZ@5794,3Z4VE@5863,COG5126@1,KOG0027@2759	NA|NA|NA	T
g|tr|g437801.t1	Foraminifera	165	2	GloG15_CONTIG150388:1-1383,1446-1737(-)		intracellular protein transport	39484.2	157966	592547	290712	144548	114454	157407	55591.8	98235.4	240704	91265.4	74199.8	249930	121323	50055.2	106769	>g|tr|g437801.t1	4432.XP_010266891.1	1.2e-204	719.5	Streptophyta			ko:K12392	ko04142,map04142				ko00000,ko00001,ko04131				Viridiplantae	37NNV@33090,3GDR4@35493,COG5096@1,KOG1061@2759	NA|NA|NA	U
g|tr|g438389.t1	Foraminifera	368	1	GloG15_CONTIG150836:555-1771(-)			60874.6	44567.4	61567.3	41583.3	60167.6	60513.7	40751.5	78156.5	53099.8	90511.1	38721.5	45130.6	34315.1	121477	63815.1	63288.1
g|tr|g439293.t1	Foraminifera	785	6	GloG15_CONTIG151527:649-813,971-1329,1414-1591(-)	IDH2	Belongs to the isocitrate and isopropylmalate dehydrogenases family	1.74275e+06	2.28649e+06	1.76266e+06	2.09787e+06	2.06944e+06	3.65893e+06	4.37241e+06	1.65759e+06	1.67278e+06	1.644e+06	1.92963e+06	2.01242e+06	2.55399e+06	1.98094e+06	2.16057e+06	2.28086e+06	>g|tr|g439293.t1	7994.ENSAMXP00000007638	2.6e-105	388.3	Actinopterygii	GO:0000287,GO:0002791,GO:0002792,GO:0003674,GO:0003824,GO:0004448,GO:0004450,GO:0005488,GO:0005575,GO:0005622,GO:0005623,GO:0005737,GO:0005739,GO:0005740,GO:0005743,GO:0005759,GO:0005777,GO:0005829,GO:0005975,GO:0006082,GO:0006091,GO:0006099,GO:0006101,GO:0006102,GO:0006103,GO:0006139,GO:0006725,GO:0006732,GO:0006733,GO:0006739,GO:0006741,GO:0006753,GO:0006793,GO:0006796,GO:0006807,GO:0007275,GO:…	1.1.1.42	ko:K00031	ko00020,ko00480,ko00720,ko01100,ko01110,ko01120,ko01130,ko01200,ko01210,ko01230,ko04146,map00020,map00480,map00720,map01100,map01110,map01120,map01130,map01200,map01210,map01230,map04146	M00009,M00010,M00173,M00740	R00267,R00268,R01899	RC00001,RC00084,RC00114,RC00626,RC02801	br01601,ko00000,ko00001,ko00002,ko01000				Metazoa	38CG3@33154,3BATQ@33208,3CVJV@33213,48173@7711,48Z1P@7742,49TRR@7898,COG0538@1,KOG1526@2759	NA|NA|NA	C
g|tr|g440409.t1	Foraminifera	561	4	GloG15_CONTIG152360:1-841,900-999(-)		Nitronate monooxygenase	614373	681687	175348	532711	617689	1.12753e+06	1.40839e+06	696933	462440	614541	543712	93459.7	612633	586129	611207	789608	>g|tr|g440409.t1	227086.JGI_V11_85874	1.3e-104	386.3	Eukaryota												Eukaryota	2QTWN@2759,COG2070@1	NA|NA|NA	S
g|tr|g441105.t1	Foraminifera	645	7	GloG15_CONTIG152885:341-684,774-1260(-)	GDI2	Rab GDP-dissociation inhibitor activity	356837	297564	247636	292583	298894	281578	378163	357985	446431	315329	233983	232381	305021	316838	369094	393049	>g|tr|g441105.t1	7739.XP_002599716.1	3.2e-62	245.4	Chordata	GO:0000323,GO:0001505,GO:0001558,GO:0001775,GO:0002252,GO:0002263,GO:0002274,GO:0002275,GO:0002283,GO:0002366,GO:0002376,GO:0002443,GO:0002444,GO:0002446,GO:0003674,GO:0005092,GO:0005093,GO:0005096,GO:0005488,GO:0005515,GO:0005575,GO:0005576,GO:0005622,GO:0005623,GO:0005737,GO:0005764,GO:0005766,GO:0005773,GO:0005775,GO:0005794,GO:0005829,GO:0006810,GO:0006836,GO:0006887,GO:0006955,GO:0007154,GO:…		ko:K03662,ko:K17255	ko00190,ko01100,ko04142,ko04145,ko05110,ko05120,ko05152,ko05161,ko05323,map00190,map01100,map04142,map04145,map05110,map05120,map05152,map05161,map05323	M00160			ko00000,ko00001,ko00002,ko04147	3.A.2.2			Metazoa	38CZK@33154,3BC03@33208,3CURQ@33213,48186@7711,COG5044@1,KOG1439@2759	NA|NA|NA	O
g|tr|g441711.t1	Foraminifera	154	2	GloG15_CONTIG153331:24-1741(-)			287354	595570	542949	459831	553385	415667	479514	448823	325506	473454	788979	1.13253e+06	924418	444693	228510	383320
g|tr|g441765.t1	Foraminifera	490	2	GloG15_CONTIG153375:311-911,964-1391(+)	qor	PFAM Alcohol dehydrogenase GroES-like domain	1.30377e+06	1.36733e+06	493007	1.04622e+06	1.10494e+06	729640	496497	1.89616e+06	986634	985298	741114	688912	703066	1.41325e+06	1.04378e+06	859164	>g|tr|g441765.t1	504728.K649_01720	7.2e-72	277.7	Deinococcus-Thermus		1.6.5.5	ko:K00344					ko00000,ko01000				Bacteria	1WIQ2@1297,COG0604@1,COG0604@2	NA|NA|NA	C
g|tr|g441840.t1	Foraminifera	821	1	GloG15_CONTIG153430:134-793(-)		asparaginase activity	435999	464637	496964	443011	370711	281724	372198	439523	381277	386537	659730	574354	631915	724656	318556	397649	>g|tr|g441840.t1	192875.XP_004347617.1	8.5e-26	124.0	Opisthokonta		3.1.1.47,3.1.1.5,3.5.1.1	ko:K01424,ko:K13278	ko00250,ko00460,ko01100,ko01110,map00250,map00460,map01100,map01110		R00485	RC00010,RC02798	ko00000,ko00001,ko01000				Opisthokonta	38D57@33154,COG0252@1,KOG0503@2759	NA|NA|NA	E
g|tr|g444049.t1	Foraminifera	808	5	GloG15_CONTIG155085:203-490,563-943,996-998(-)	RAB32	BLOC-2 complex binding	394804	412098	374345	452693	273445	344822	342548	378108	475373	391004	388653	1.0687e+06	315670	374654	379115	342413	>g|tr|g444049.t1	10224.XP_002733795.1	1.1e-44	186.8	Bilateria	GO:0000166,GO:0000323,GO:0001882,GO:0001883,GO:0002376,GO:0003674,GO:0003824,GO:0003924,GO:0005488,GO:0005515,GO:0005525,GO:0005575,GO:0005622,GO:0005623,GO:0005737,GO:0005739,GO:0005740,GO:0005741,GO:0005764,GO:0005768,GO:0005769,GO:0005773,GO:0005783,GO:0005794,GO:0005802,GO:0005829,GO:0006464,GO:0006807,GO:0006810,GO:0006873,GO:0006885,GO:0006996,GO:0007005,GO:0007033,GO:0007040,GO:0007154,GO:…		ko:K07918,ko:K07923					ko00000,ko04031,ko04131				Metazoa	38BWT@33154,3B9BE@33208,3CV0Z@33213,KOG4423@1,KOG4423@2759	NA|NA|NA	U
g|tr|g444097.t1	Foraminifera	523	7	GloG15_CONTIG155115:449-547,611-643,718-879,942-1077,1186-1740(+)	SDH1	flavoprotein subunit, mitochondrial	235981	684796	304733	546932	473403	650683	1.0371e+06	237489	272323	400902	273306	242669	652933	260244	257051	349053	>g|tr|g444097.t1	42099.EPrPV00000020227	5.4e-133	480.7	Pythiales	GO:0000104,GO:0003674,GO:0003824,GO:0005575,GO:0005622,GO:0005623,GO:0005737,GO:0005739,GO:0005740,GO:0005743,GO:0005746,GO:0005749,GO:0006082,GO:0006091,GO:0006099,GO:0006101,GO:0006119,GO:0006121,GO:0006139,GO:0006163,GO:0006725,GO:0006753,GO:0006793,GO:0006796,GO:0006807,GO:0008150,GO:0008152,GO:0008177,GO:0009055,GO:0009060,GO:0009061,GO:0009117,GO:0009123,GO:0009126,GO:0009141,GO:0009144,GO:…	1.3.5.1	ko:K00234	ko00020,ko00190,ko01100,ko01110,ko01120,ko01130,ko01200,ko04714,ko04932,ko05010,ko05012,ko05016,map00020,map00190,map01100,map01110,map01120,map01130,map01200,map04714,map04932,map05010,map05012,map05016	M00009,M00011,M00148	R02164	RC00045	ko00000,ko00001,ko00002,ko01000				Eukaryota	1MC4A@121069,COG1053@1,KOG2403@2759	NA|NA|NA	C
g|tr|g445202.t1	Foraminifera	254	5	GloG15_CONTIG155984:1-1438(-)	IPO4	ribosomal protein import into nucleus	400686	375106	306446	349056	340726	544176	512503	476680	588262	520537	448161	220383	571671	426606	568243	698362	>g|tr|g445202.t1	6500.XP_005096783.1	4.8e-29	136.0	Bilateria	GO:0000060,GO:0000228,GO:0000785,GO:0000790,GO:0003674,GO:0005048,GO:0005215,GO:0005488,GO:0005575,GO:0005622,GO:0005623,GO:0005634,GO:0005635,GO:0005694,GO:0005737,GO:0006323,GO:0006325,GO:0006333,GO:0006334,GO:0006335,GO:0006336,GO:0006606,GO:0006607,GO:0006610,GO:0006810,GO:0006886,GO:0006913,GO:0006996,GO:0008104,GO:0008139,GO:0008150,GO:0008565,GO:0009987,GO:0012505,GO:0015031,GO:0015833,GO:…		ko:K20221,ko:K20222					ko00000,ko03009	1.I.1			Metazoa	38CEE@33154,3BBR5@33208,3CZQU@33213,KOG2171@1,KOG2171@2759	NA|NA|NA	UY
g|tr|g445970.t1	Foraminifera	541	1	GloG15_CONTIG156547:717-1203,1264-1730(+)	GRX3	Monothiol	232626	227196	166025	199601	157365	435629	192694	248836	155600	238179	43061.7	69695.3	191791	188681	205219	232704	>g|tr|g445970.t1	109760.SPPG_08509T0	3.8e-67	261.9	Fungi	GO:0001085,GO:0001102,GO:0003674,GO:0003824,GO:0005488,GO:0005515,GO:0005575,GO:0005622,GO:0005623,GO:0005634,GO:0005737,GO:0005829,GO:0006790,GO:0006807,GO:0006873,GO:0006875,GO:0006879,GO:0006950,GO:0006979,GO:0006996,GO:0007010,GO:0008104,GO:0008134,GO:0008150,GO:0008152,GO:0009893,GO:0009987,GO:0010467,GO:0010604,GO:0010638,GO:0015036,GO:0015037,GO:0015038,GO:0016043,GO:0016226,GO:0016491,GO:…										iMM904.YER174C	Fungi	38BF9@33154,3NXX9@4751,COG0278@1,KOG0911@2759	NA|NA|NA	O
g|tr|g446931.t1	Foraminifera	1035	5	GloG15_CONTIG157240:18-476(+)	CCT8	unfolded protein binding	4.61523e+06	4.46578e+06	2.2737e+06	3.26069e+06	4.41335e+06	4.73599e+06	5.77038e+06	4.11747e+06	3.73062e+06	3.58029e+06	2.39776e+06	3.19422e+06	3.87366e+06	3.91778e+06	3.72762e+06	3.93604e+06	>g|tr|g446931.t1	51511.ENSCSAVP00000013841	2.2e-20	105.5	Chordata	GO:0000003,GO:0000323,GO:0001775,GO:0002199,GO:0002252,GO:0002263,GO:0002274,GO:0002275,GO:0002283,GO:0002366,GO:0002376,GO:0002443,GO:0002444,GO:0002446,GO:0003674,GO:0003824,GO:0005488,GO:0005515,GO:0005575,GO:0005576,GO:0005622,GO:0005623,GO:0005634,GO:0005654,GO:0005737,GO:0005764,GO:0005766,GO:0005773,GO:0005775,GO:0005813,GO:0005815,GO:0005829,GO:0005832,GO:0005856,GO:0005874,GO:0006457,GO:…		ko:K09500					ko00000,ko03036,ko03110				Metazoa	38CBH@33154,3BA57@33208,3CTAU@33213,48264@7711,KOG0362@1,KOG0362@2759	NA|NA|NA	O
g|tr|g448152.t1	Foraminifera	706	5	GloG15_CONTIG158173:882-1377,1440-1719(+)	ACTR3	cytoskeleton organization	41064.8	260090	280995	273501	218027	124888	254670	214307	91973.7	297033	701747	232078	253842	208066	81606.7	187016	>g|tr|g448152.t1	227086.JGI_V11_54144	6.6e-94	350.5	Eukaryota	GO:0000001,GO:0000003,GO:0000139,GO:0000166,GO:0000278,GO:0000280,GO:0000281,GO:0000768,GO:0000902,GO:0000904,GO:0000910,GO:0000912,GO:0000915,GO:0001558,GO:0001667,GO:0001700,GO:0001726,GO:0001891,GO:0002009,GO:0002064,GO:0002065,GO:0002066,GO:0002102,GO:0002252,GO:0002253,GO:0002376,GO:0002429,GO:0002431,GO:0002433,GO:0002682,GO:0002684,GO:0002757,GO:0002764,GO:0002768,GO:0003006,GO:0003674,GO:…		ko:K14398,ko:K18584	ko03015,ko04138,ko04530,map03015,map04138,map04530				ko00000,ko00001,ko03019,ko04131,ko04147,ko04812				Eukaryota	COG5277@1,KOG0678@2759	NA|NA|NA	Z
g|tr|g449442.t1	Foraminifera	513	1	GloG15_CONTIG159176:621-1492,1566-1698(-)		Belongs to the peptidase S10 family	187551	96693	258675	97003	227088	179539	147087	252241	175914	161591	232756	18437.9	154544	60163.6	268646	104657	>g|tr|g449442.t1	946362.XP_004989231.1	2.4e-56	226.1	Opisthokonta		3.4.16.5	ko:K09645,ko:K13289,ko:K16296	ko04142,ko04614,map04142,map04614				ko00000,ko00001,ko01000,ko01002,ko03110,ko04131,ko04147				Opisthokonta	38FWP@33154,COG2939@1,KOG1282@2759	NA|NA|NA	O
g|tr|g450688.t1	Foraminifera	274	3	GloG15_CONTIG160132:1-1392(-)		Fumarase C C-terminus	724450	922382	653221	1.04077e+06	1.11725e+06	1.32666e+06	1.60525e+06	945984	706148	966730	705657	664759	877276	716606	1.32548e+06	1.03145e+06	>g|tr|g450688.t1	78898.MVEG_11152T0	4.7e-167	594.3	Fungi incertae sedis		4.2.1.2	ko:K01679	ko00020,ko00620,ko00720,ko01100,ko01110,ko01120,ko01130,ko01200,ko04934,ko05200,ko05211,map00020,map00620,map00720,map01100,map01110,map01120,map01130,map01200,map04934,map05200,map05211	M00009,M00011,M00173,M00376	R01082	RC00443	ko00000,ko00001,ko00002,ko01000				Fungi	1GSZV@112252,38GHX@33154,3NTY2@4751,COG0114@1,KOG1317@2759	NA|NA|NA	C
g|tr|g451053.t1	Foraminifera	303	3	GloG15_CONTIG160411:171-1032,1090-1565(-)		phosphatidylinositol binding	157605	292772	243725	294701	385370	162345	313632	264409	318363	451295	459434	995739	442898	237056	155508	220979	>g|tr|g451053.t1	227086.JGI_V11_68606	2.6e-37	163.3	Eukaryota			ko:K17917,ko:K17921	ko04144,map04144				ko00000,ko00001,ko04131				Eukaryota	COG5391@1,KOG2273@2759	NA|NA|NA	U
g|tr|g451351.t1	Foraminifera	535	6	GloG15_CONTIG160637:1-151,213-667,770-1134(+)		cytoskeleton organization	743795	740137	796737	794265	613526	521824	716051	565235	1.22544e+06	871295	609938	718363	1.11561e+06	444185	298543	546027	>g|tr|g451351.t1	7897.ENSLACP00000002853	4.8e-118	431.0	Vertebrata	GO:0000902,GO:0001667,GO:0002009,GO:0003674,GO:0005198,GO:0005200,GO:0005575,GO:0005622,GO:0005623,GO:0005856,GO:0005884,GO:0005885,GO:0006928,GO:0006996,GO:0007010,GO:0007015,GO:0007275,GO:0007369,GO:0008064,GO:0008150,GO:0008582,GO:0009653,GO:0009790,GO:0009888,GO:0009987,GO:0010631,GO:0010638,GO:0015629,GO:0016043,GO:0016331,GO:0016477,GO:0030029,GO:0030036,GO:0030832,GO:0030833,GO:0030838,GO:…		ko:K17260	ko04138,ko04530,map04138,map04530				ko00000,ko00001,ko04131,ko04147,ko04812				Metazoa	38C7E@33154,3BE2H@33208,3CS7E@33213,4844A@7711,48ZWV@7742,COG5277@1,KOG0677@2759	NA|NA|NA	Z
g|tr|g451908.t1	Foraminifera	362	2	GloG15_CONTIG161057:483-1700(+)	CAND1	Cullin-associated NEDD8-dissociated protein. Source PGD	964496	777114	684239	705488	916785	763734	1.04214e+06	1.11247e+06	1.00267e+06	858589	1.5265e+06	1.13768e+06	1.1006e+06	1.02128e+06	1.03931e+06	825834	>g|tr|g451908.t1	42099.EPrPV00000017120	2.6e-52	213.0	Pythiales	GO:0000003,GO:0000151,GO:0000909,GO:0003002,GO:0003006,GO:0005575,GO:0005618,GO:0005622,GO:0005623,GO:0005634,GO:0005737,GO:0005829,GO:0005886,GO:0006464,GO:0006725,GO:0006807,GO:0007049,GO:0007275,GO:0007389,GO:0008150,GO:0008152,GO:0009404,GO:0009653,GO:0009712,GO:0009719,GO:0009725,GO:0009733,GO:0009791,GO:0009987,GO:0010033,GO:0010051,GO:0010228,GO:0010265,GO:0016020,GO:0016043,GO:0016567,GO:…		ko:K09490,ko:K17263	ko03060,ko04141,ko04918,ko05020,map03060,map04141,map04918,map05020				ko00000,ko00001,ko03110,ko04131,ko04147	1.A.33			Eukaryota	1MC5W@121069,KOG1824@1,KOG1824@2759	NA|NA|NA	S
g|tr|g452716.t1	Foraminifera	938	5	GloG15_CONTIG161663:586-992,1058-1177,1237-1276(-)	Rac1	Ras-related C3 botulinum toxin substrate 1 (rho family, small GTP binding protein Rac1)	4.20305e+06	3.86088e+06	2.51274e+06	3.13247e+06	3.52959e+06	3.15486e+06	2.79379e+06	3.64571e+06	5.16919e+06	3.85111e+06	6.20518e+06	5.0027e+06	4.01794e+06	4.5227e+06	5.52226e+06	5.08734e+06	>g|tr|g452716.t1	244447.XP_008313345.1	1.1e-74	286.2	Actinopterygii	GO:0000003,GO:0000132,GO:0000165,GO:0000166,GO:0000226,GO:0000278,GO:0000768,GO:0000902,GO:0000904,GO:0001558,GO:0001654,GO:0001667,GO:0001700,GO:0001726,GO:0001736,GO:0001737,GO:0001738,GO:0001745,GO:0001751,GO:0001754,GO:0001764,GO:0001882,GO:0001883,GO:0001932,GO:0001934,GO:0001952,GO:0001954,GO:0002009,GO:0002064,GO:0002065,GO:0002066,GO:0002118,GO:0002119,GO:0002164,GO:0002165,GO:0002252,GO:…		ko:K04392,ko:K07860,ko:K07861	ko04010,ko04013,ko04014,ko04015,ko04024,ko04062,ko04071,ko04145,ko04151,ko04310,ko04360,ko04370,ko04380,ko04510,ko04520,ko04530,ko04620,ko04650,ko04662,ko04664,ko04666,ko04670,ko04722,ko04810,ko04932,ko04933,ko04972,ko05014,ko05100,ko05120,ko05131,ko05132,ko05167,ko05200,ko05203,ko05205,ko05210,ko05211,ko05212,ko05231,ko05416,ko05418,map04010,map04013,map04014,map04015,map04024,map04062,map04071,…				ko00000,ko00001,ko04031,ko04131,ko04147				Metazoa	38BJN@33154,3BE5W@33208,3CXWR@33213,484ZF@7711,48Y98@7742,49T1J@7898,COG1100@1,KOG0393@2759	NA|NA|NA	U
g|tr|g452750.t1	Foraminifera	555	1	GloG15_CONTIG161687:1-285,359-913,984-1085(-)			134120	76620.1	102381	89603.3	118437	64534.5	52326.8	89889.7	122906	103266	71026	301669	79205	135666	81225.2	104688
g|tr|g453404.t1	Foraminifera	1039	5	GloG15_CONTIG162183:1137-1592(-)		Belongs to the cullin family	166670	614367	640793	594490	527496	390583	616520	361078	317450	670225	241050	714150	780234	294669	218131	416864	>g|tr|g453404.t1	3656.XP_008443419.1	2.7e-23	115.2	fabids			ko:K03869	ko04120,ko04340,ko04341,map04120,map04340,map04341	M00384			ko00000,ko00001,ko00002,ko03400,ko04121				Viridiplantae	37I6E@33090,3GEGV@35493,4JN8Z@91835,COG5647@1,KOG2166@2759	NA|NA|NA	D
g|tr|g453650.t1	Foraminifera	352	1	GloG15_CONTIG162372:189-1421(-)	SCCPDH	oxidoreductase activity	179868	264347	65302	143901	199987	315283	239388	213373	179895	212602	174277	13483.4	187687	179647	177688	209709	>g|tr|g453650.t1	7719.XP_002125674.1	1.8e-53	216.9	Chordata	GO:0002576,GO:0005575,GO:0005576,GO:0005622,GO:0005623,GO:0005737,GO:0005811,GO:0006810,GO:0006887,GO:0007275,GO:0007423,GO:0007444,GO:0008150,GO:0009888,GO:0009987,GO:0012505,GO:0016192,GO:0022416,GO:0030141,GO:0030496,GO:0031091,GO:0031093,GO:0031410,GO:0031974,GO:0031982,GO:0031983,GO:0032501,GO:0032502,GO:0032940,GO:0034774,GO:0035220,GO:0035295,GO:0043226,GO:0043227,GO:0043228,GO:0043229,GO:…											Metazoa	38D2K@33154,3BE3X@33208,3CZIP@33213,486KW@7711,COG3268@1,KOG2733@2759	NA|NA|NA	S
g|tr|g454254.t1	Foraminifera	298	1	GloG15_CONTIG162824:286-447,509-1688(+)	NPEPPS	metalloaminopeptidase activity	1.02168e+06	955052	2.68421e+06	1.87136e+06	751950	1.22418e+06	1.22157e+06	1.2187e+06	1.56236e+06	1.21738e+06	1.41649e+06	2.30944e+06	1.25171e+06	1.50138e+06	1.40811e+06	1.07282e+06	>g|tr|g454254.t1	7668.SPU_013660-tr	5.8e-130	471.1	Bilateria	GO:0000003,GO:0000209,GO:0000578,GO:0000793,GO:0000922,GO:0001666,GO:0003002,GO:0003674,GO:0003824,GO:0004177,GO:0005488,GO:0005575,GO:0005622,GO:0005623,GO:0005694,GO:0005737,GO:0005819,GO:0005829,GO:0005856,GO:0006464,GO:0006508,GO:0006518,GO:0006807,GO:0006950,GO:0007049,GO:0007275,GO:0007350,GO:0007351,GO:0007389,GO:0008150,GO:0008152,GO:0008233,GO:0008235,GO:0008237,GO:0008238,GO:0008270,GO:…		ko:K08776					ko00000,ko01000,ko01002				Metazoa	38CFG@33154,3BADC@33208,3CW5S@33213,COG0308@1,KOG1046@2759	NA|NA|NA	O
g|tr|g454623.t1	Foraminifera	780	2	GloG15_CONTIG163100:744-1451(-)		acyl-CoA synthetase 6	168546	814640	478292	655829	572561	558442	1.08242e+06	345719	436577	791538	364397	676922	987390	385641	255954	513743	>g|tr|g454623.t1	3712.Bo5g144910.1	7.7e-57	227.3	Brassicales	GO:0000302,GO:0001101,GO:0001676,GO:0003674,GO:0003824,GO:0004467,GO:0005575,GO:0005622,GO:0005623,GO:0005737,GO:0005777,GO:0006082,GO:0006629,GO:0006631,GO:0006950,GO:0006970,GO:0006979,GO:0008150,GO:0008152,GO:0009628,GO:0009651,GO:0009987,GO:0010035,GO:0010193,GO:0015645,GO:0016020,GO:0016405,GO:0016874,GO:0016877,GO:0016878,GO:0019752,GO:0032787,GO:0042221,GO:0042493,GO:0042579,GO:0043226,GO:…	6.2.1.3	ko:K01897	ko00061,ko00071,ko01100,ko01212,ko02024,ko03320,ko04146,ko04216,ko04714,ko04920,map00061,map00071,map01100,map01212,map02024,map03320,map04146,map04216,map04714,map04920	M00086	R01280	RC00004,RC00014	ko00000,ko00001,ko00002,ko01000,ko01004,ko04147	4.C.1.1			Viridiplantae	37QX3@33090,3GBB4@35493,3HX47@3699,COG1022@1,KOG1256@2759	NA|NA|NA	I
g|tr|g457524.t1	Foraminifera	1129	3	GloG15_CONTIG165365:4-270,356-391(-)			1.19813e+06	989723	1.161e+06	972268	1.10989e+06	1.63044e+06	1.40755e+06	931910	1.35741e+06	1.36798e+06	977771	759291	1.16451e+06	836553	1.29878e+06	1.0036e+06
g|tr|g457795.t1	Foraminifera	337	3	GloG15_CONTIG165588:26-442,510-1346(+)		Hsp90 protein	58520.8	150204	197764	137505	177802	167937	225685	155186	144869	199740	374458	658651	345823	253572	151065	295238	>g|tr|g457795.t1	325452.fgenesh_scip_prom.46568.10572	3e-72	279.3	Peronosporales			ko:K09488					ko00000,ko03110				Eukaryota	3QD9F@4776,COG0326@1,KOG0019@2759	NA|NA|NA	O
g|tr|g459185.t1	Foraminifera	987	1	GloG15_CONTIG166653:236-751(+)		Tubulin is the major constituent of microtubules. It binds two moles of GTP, one at an exchangeable site on the beta chain and one at a non-exchangeable site on the alpha chain	533386	736809	184225	495396	571644	539438	247509	522989	602015	406960	395802	68141.6	273263	374254	281978	620793	>g|tr|g459185.t1	3659.XP_004149645.1	8.1e-32	143.7	fabids			ko:K07374	ko04145,ko04210,ko04530,ko04540,ko05130,map04145,map04210,map04530,map04540,map05130				ko00000,ko00001,ko03019,ko03036,ko04147,ko04812				Viridiplantae	37NA5@33090,3G7Z6@35493,4JEUX@91835,COG5023@1,KOG1376@2759	NA|NA|NA	Z
g|tr|g459733.t1	Foraminifera	504	3	GloG15_CONTIG167083:1-1022(+)	D2HGDH	FAD linked oxidases, C-terminal domain	137181	131127	376822	195983	212171	225132	270289	87776.3	155938	111745	438200	270927	130159	293312	199150	158714	>g|tr|g459733.t1	38727.Pavir.Bb00518.1.p	4.9e-97	361.3	Poales	GO:0000166,GO:0003674,GO:0003824,GO:0004457,GO:0004458,GO:0005488,GO:0005575,GO:0005622,GO:0005623,GO:0005737,GO:0005739,GO:0006082,GO:0006089,GO:0006091,GO:0006807,GO:0008150,GO:0008152,GO:0009853,GO:0009987,GO:0015980,GO:0016491,GO:0016614,GO:0016898,GO:0019516,GO:0019752,GO:0022900,GO:0022904,GO:0032787,GO:0036094,GO:0043094,GO:0043167,GO:0043168,GO:0043226,GO:0043227,GO:0043229,GO:0043231,GO:…	1.1.99.39	ko:K18204					ko00000,ko01000				Viridiplantae	37IKT@33090,3GFK4@35493,3I9RK@38820,3KV0U@4447,COG0277@1,KOG1232@2759	NA|NA|NA	C
g|tr|g461858.t1	Foraminifera	353	2	GloG15_CONTIG168725:138-213,284-349,419-1509(+)		actin filament severing	864923	3.39218e+06	4.51752e+06	3.45288e+06	3.1729e+06	1.72811e+06	2.9505e+06	1.82849e+06	1.5987e+06	2.36199e+06	8.38842e+06	4.66987e+06	2.58875e+06	5.52048e+06	2.11329e+06	2.07287e+06	>g|tr|g461858.t1	192875.XP_004344468.1	5e-27	129.0	Opisthokonta			ko:K05768,ko:K08017	ko04666,ko04810,ko05203,map04666,map04810,map05203				ko00000,ko00001,ko04147,ko04812				Opisthokonta	38BDF@33154,KOG0443@1,KOG0443@2759	NA|NA|NA	Z
g|tr|g464884.t1	Foraminifera	675	1	GloG15_CONTIG171093:427-1192,1264-1304(+)		oxidation-reduction process	39148.7	71427	38331.3	69014.4	38311.1	49490.9	37868	82257.2	63773.1	22923.5	739.976	22.1813	19363.9	26722.2	1374.34	75260.7	>g|tr|g464884.t1	227086.JGI_V11_34749	2.2e-63	249.2	Eukaryota												Eukaryota	COG1028@1,KOG0725@2759	NA|NA|NA	IQ
g|tr|g465480.t1-g|tr|g925124.t1(86.02%)	Foraminifera	926	7	GloG15_CONTIG661931:149-706(+)		modification-dependent protein catabolic process	8.86788e+06	7.23855e+06	8.2518e+06	6.86399e+06	6.63323e+06	6.6947e+06	6.22365e+06	6.70039e+06	8.72251e+06	5.73945e+06	8.86228e+06	8.31507e+06	6.91706e+06	8.8715e+06	8.10715e+06	8.38957e+06	>g|tr|g465480.t1	227086.JGI_V11_52203	1.4e-27	129.8	Eukaryota			ko:K03094	ko04110,ko04111,ko04114,ko04120,ko04141,ko04310,ko04341,ko04350,ko04710,ko05168,ko05200,map04110,map04111,map04114,map04120,map04141,map04310,map04341,map04350,map04710,map05168,map05200	M00379,M00380,M00381,M00382,M00387,M00407,M00411			ko00000,ko00001,ko00002,ko03036,ko04121				Eukaryota	COG5201@1,KOG1724@2759	NA|NA|NA	O
g|tr|g465582.t1	Foraminifera	542	11	GloG15_CONTIG171636:519-956,1030-1548(-)	YHM1	Belongs to the mitochondrial carrier (TC 2.A.29) family	522785	717848	996693	779666	880277	870898	1.13922e+06	800811	562526	803687	544775	1.03171e+06	815910	740587	687133	759066	>g|tr|g465582.t1	28583.AMAG_04618T0	2e-84	319.3	Fungi	GO:0000002,GO:0001408,GO:0001409,GO:0003674,GO:0005215,GO:0005575,GO:0005622,GO:0005623,GO:0005737,GO:0005739,GO:0005740,GO:0005743,GO:0006810,GO:0006839,GO:0006862,GO:0006863,GO:0006873,GO:0006875,GO:0006879,GO:0006996,GO:0007005,GO:0008150,GO:0009987,GO:0015215,GO:0015216,GO:0015605,GO:0015748,GO:0015851,GO:0015854,GO:0015865,GO:0015931,GO:0015932,GO:0016020,GO:0016021,GO:0016043,GO:0019725,GO:…											Fungi	38DKN@33154,3NUAX@4751,KOG0750@1,KOG0750@2759	NA|NA|NA	C
g|tr|g466959.t1	Foraminifera	285	1	GloG15_CONTIG172698:1-1375(-)	NT5DC3	5' nucleotidase family	104172	270162	108166	110226	255047	272144	215032	215057	239290	208959	80527.9	4592.32	215530	132333	212755	217232	>g|tr|g466959.t1	44689.DDB0230203	8.7e-73	281.2	Amoebozoa	GO:0003674,GO:0003824,GO:0005575,GO:0005622,GO:0005623,GO:0005737,GO:0005829,GO:0006793,GO:0006796,GO:0008150,GO:0008152,GO:0008252,GO:0008253,GO:0009987,GO:0016311,GO:0016787,GO:0016788,GO:0016791,GO:0032991,GO:0042578,GO:0043235,GO:0044237,GO:0044424,GO:0044444,GO:0044464											Eukaryota	3XAW5@554915,KOG2469@1,KOG2470@2759	NA|NA|NA	F
g|tr|g466974.t1	Foraminifera	906	1	GloG15_CONTIG172710:125-381,444-783(+)		procollagen-proline 4-dioxygenase activity	2.64887e+06	2.65064e+06	1.53111e+06	2.34479e+06	2.74496e+06	2.89121e+06	4.38516e+06	2.0057e+06	2.03297e+06	1.95243e+06	2.75731e+06	4.37907e+06	2.62422e+06	2.62066e+06	2.10433e+06	2.51563e+06	>g|tr|g466974.t1	227086.JGI_V11_41476	4e-14	85.1	Eukaryota		1.14.11.2	ko:K00472	ko00330,ko01100,map00330,map01100		R01252	RC00478	ko00000,ko00001,ko01000				Eukaryota	KOG1591@1,KOG1591@2759	NA|NA|NA	S
g|tr|g467256.t1	Foraminifera	397	1	GloG15_CONTIG172932:438-1604(+)		His Kinase A (phosphoacceptor) domain	370439	222081	1.14047e+06	520096	225112	197540	279075	206514	372521	532461	375197	4.21643e+06	372606	495093	512641	458610	>g|tr|g467256.t1	1304885.AUEY01000029_gene2487	4.4e-25	122.5	Desulfobacterales												Bacteria	1R5EN@1224,2MITZ@213118,2X7E0@28221,42NK9@68525,COG0642@1,COG0642@2,COG5002@1,COG5002@2	NA|NA|NA	T
g|tr|g467731.t1	Foraminifera	425	4	GloG15_CONTIG173298:509-1625(+)	GLUD1	Belongs to the Glu Leu Phe Val dehydrogenases family	1.02911e+06	1.96059e+06	1.17811e+06	1.59756e+06	2.18485e+06	1.69703e+06	2.36942e+06	1.73228e+06	1.26516e+06	1.5647e+06	1.68699e+06	1.64539e+06	1.98864e+06	1.40522e+06	1.14927e+06	1.55973e+06	>g|tr|g467731.t1	44689.DDB0231438	1.5e-83	316.6	Amoebozoa	GO:0000003,GO:0000166,GO:0001882,GO:0001883,GO:0002791,GO:0002793,GO:0003008,GO:0003674,GO:0003824,GO:0004352,GO:0004353,GO:0005488,GO:0005515,GO:0005525,GO:0005575,GO:0005622,GO:0005623,GO:0005737,GO:0005739,GO:0005740,GO:0005743,GO:0005759,GO:0006082,GO:0006103,GO:0006106,GO:0006116,GO:0006139,GO:0006520,GO:0006536,GO:0006537,GO:0006538,GO:0006541,GO:0006725,GO:0006732,GO:0006733,GO:0006734,GO:…	1.4.1.3	ko:K00261	ko00220,ko00250,ko00471,ko00910,ko01100,ko01200,ko04217,ko04964,map00220,map00250,map00471,map00910,map01100,map01200,map04217,map04964	M00740	R00243,R00248	RC00006,RC02799	ko00000,ko00001,ko00002,ko01000,ko04147				Eukaryota	3XEFY@554915,COG0334@1,KOG2250@2759	NA|NA|NA	C
g|tr|g469323.t1	Foraminifera	915	1	GloG15_CONTIG174539:460-857,907-990,1053-1104,1176-1226(-)		Ras protein let-60. Source PGD	250682	265300	390186	139980	221820	343029	157947	221781	421460	352645	97738	122472	499305	194493	334881	238648	>g|tr|g469323.t1	65071.PYU1_T007663	3.4e-58	231.5	Pythiales			ko:K07208,ko:K07827	ko01521,ko01522,ko04010,ko04012,ko04013,ko04014,ko04015,ko04062,ko04068,ko04071,ko04072,ko04137,ko04138,ko04140,ko04150,ko04151,ko04152,ko04210,ko04211,ko04213,ko04214,ko04218,ko04320,ko04360,ko04370,ko04371,ko04540,ko04550,ko04650,ko04660,ko04662,ko04664,ko04714,ko04720,ko04722,ko04725,ko04726,ko04730,ko04810,ko04910,ko04912,ko04914,ko04915,ko04916,ko04917,ko04919,ko04921,ko04926,ko04933,ko04960…				ko00000,ko00001,ko04031,ko04131				Eukaryota	1MCZK@121069,COG1100@1,KOG0395@2759	NA|NA|NA	S
g|tr|g469425.t1	Foraminifera	477	1	GloG15_CONTIG174628:24-1066(-)	PPP6C	phosphoprotein phosphatase activity	26422	50922.1	146132	59492.2	54954.2	77318	91371.9	48859.9	62064.6	74156.2	61895.9	52069.6	61573.9	22982.3	59044.1	64993.7	>g|tr|g469425.t1	55529.EKX51908	5.2e-110	404.4	Eukaryota	GO:0000082,GO:0000159,GO:0000226,GO:0000228,GO:0000235,GO:0000278,GO:0000785,GO:0000790,GO:0001302,GO:0001932,GO:0001933,GO:0002097,GO:0002098,GO:0003674,GO:0003824,GO:0004672,GO:0004674,GO:0004721,GO:0004722,GO:0005488,GO:0005515,GO:0005575,GO:0005622,GO:0005623,GO:0005634,GO:0005694,GO:0005730,GO:0005737,GO:0005739,GO:0005818,GO:0005819,GO:0005829,GO:0005856,GO:0005874,GO:0005876,GO:0005881,GO:…	3.1.3.16	ko:K01090,ko:K15423,ko:K15427,ko:K15498	ko04922,map04922				ko00000,ko00001,ko01000,ko01009,ko03016,ko03400				Eukaryota	COG0639@1,KOG0373@2759	NA|NA|NA	T
g|tr|g471050.t1	Foraminifera	978	2	GloG15_CONTIG175898:1-526(+)	pccA	Biotin carboxylase C-terminal domain	152808	270381	4735.86	219396	216430	290438	196987	256107	254240	235128	34787	116650	147066	121237	267517	157567	>g|tr|g471050.t1	1282876.BAOK01000001_gene1756	1.4e-18	99.8	unclassified Alphaproteobacteria		6.4.1.3	ko:K01965	ko00280,ko00630,ko00640,ko01100,ko01120,ko01130,ko01200,map00280,map00630,map00640,map01100,map01120,map01130,map01200	M00373,M00741	R01859	RC00097,RC00609	ko00000,ko00001,ko00002,ko01000				Bacteria	1P6RE@1224,2TRC2@28211,4BPR1@82117,COG4770@1,COG4770@2	NA|NA|NA	I
g|tr|g472370.t1	Foraminifera	539	1	GloG15_CONTIG176940:1-450,543-1051(-)			861097	1.19525e+06	1.24486e+06	1.26541e+06	1.68751e+06	1.64437e+06	2.10581e+06	1.12535e+06	831406	1.31808e+06	834340	1.08277e+06	1.6246e+06	1.22775e+06	844290	884748
g|tr|g472412.t1	Foraminifera	408	1	GloG15_CONTIG176971:227-1378(-)		Spfh domain band 7 family protein	46269.8	78844.7	87973.4	56294.7	107058	73454.6	102000	80638.2	73529.5	124444	64396	10174.6	89772.8	138505	95513.8	86370.1	>g|tr|g472412.t1	5911.EAR91603	2.1e-43	183.3	Ciliophora												Eukaryota	28VPA@1,2R2EY@2759,3ZD0C@5878	NA|NA|NA	S
g|tr|g472468.t1	Foraminifera	948	2	GloG15_CONTIG177022:146-529,604-774(+)	SAR1	Belongs to the small GTPase superfamily. SAR1 family	71713.2	75413	43488.6	60428.1	60323.3	97526.1	138028	46361.3	80657	120185	57997.7	96406.8	94917.1	69447.1	85406.5	93812.5	>g|tr|g472468.t1	84751.XP_007880298.1	2.9e-59	235.0	Basidiomycota	GO:0000166,GO:0000266,GO:0001882,GO:0001883,GO:0003400,GO:0003674,GO:0003824,GO:0003924,GO:0005488,GO:0005525,GO:0005575,GO:0005622,GO:0005623,GO:0005737,GO:0005783,GO:0005789,GO:0005798,GO:0006810,GO:0006886,GO:0006888,GO:0006996,GO:0006997,GO:0006998,GO:0007005,GO:0007006,GO:0007154,GO:0007165,GO:0007264,GO:0008104,GO:0008150,GO:0009987,GO:0010256,GO:0012505,GO:0012506,GO:0012507,GO:0015031,GO:…		ko:K07953	ko04141,ko05134,map04141,map05134	M00404			ko00000,ko00001,ko00002,ko01000,ko04031,ko04131				Fungi	38URR@33154,3NV7B@4751,3UZ5F@5204,KOG0077@1,KOG0077@2759	NA|NA|NA	U
g|tr|g473744.t1	Foraminifera	369	9	GloG15_CONTIG178032:269-1467,1577-1592(-)		Catalyzes the oxidative decarboxylation of 6- phosphogluconate to ribulose 5-phosphate and CO(2), with concomitant reduction of NADP to NADPH	490559	515079	292467	360636	623935	695856	828494	825763	631299	500756	445000	282541	585779	475901	518729	556469	>g|tr|g473744.t1	28532.XP_010549952.1	1.7e-133	482.6	Brassicales	GO:0000003,GO:0001101,GO:0003674,GO:0003824,GO:0004616,GO:0005575,GO:0005622,GO:0005623,GO:0005737,GO:0005777,GO:0005829,GO:0006950,GO:0006970,GO:0008037,GO:0008150,GO:0008152,GO:0009266,GO:0009409,GO:0009414,GO:0009415,GO:0009507,GO:0009532,GO:0009536,GO:0009566,GO:0009567,GO:0009570,GO:0009628,GO:0009651,GO:0009719,GO:0009725,GO:0009737,GO:0009987,GO:0009988,GO:0010033,GO:0010035,GO:0016043,GO:…	1.1.1.343,1.1.1.44	ko:K00033	ko00030,ko00480,ko01100,ko01110,ko01120,ko01130,ko01200,map00030,map00480,map01100,map01110,map01120,map01130,map01200	M00004,M00006	R01528,R10221	RC00001,RC00539	ko00000,ko00001,ko00002,ko01000				Viridiplantae	37I0U@33090,3G9N7@35493,3HT3Y@3699,COG0362@1,KOG2653@2759	NA|NA|NA	G
g|tr|g474045.t1	Foraminifera	943	2	GloG15_CONTIG178258:952-1002,1067-1579(+)			1.22105e+06	1.19296e+06	989708	1.1471e+06	1.23387e+06	1.03837e+06	1.2592e+06	1.50889e+06	1.42858e+06	1.22706e+06	1.54744e+06	1.72056e+06	1.211e+06	1.63298e+06	794998	1.38087e+06
g|tr|g475440.t1	Foraminifera	389	1	GloG15_CONTIG179359:351-609,675-1591(+)		structural constituent of cytoskeleton	660449	534644	535844	551855	448663	266715	348591	314369	726632	346136	100798	136531	636952	298942	204682	268369	>g|tr|g475440.t1	45157.CMT504CT	2.2e-104	386.0	Eukaryota			ko:K07374	ko04145,ko04210,ko04530,ko04540,ko05130,map04145,map04210,map04530,map04540,map05130				ko00000,ko00001,ko03019,ko03036,ko04147,ko04812				Eukaryota	COG5023@1,KOG1376@2759	NA|NA|NA	Z
g|tr|g475942.t1	Foraminifera	826	1	GloG15_CONTIG179769:352-1005(+)	SYN3	signal release from synapse	12640	23152.3	5258.12	14020.8	9851.64	9147.48	6781.47	16837.4	11327.5	7947.76	0	381.702	7167.82	12824.7	725.887	15250.5	>g|tr|g475942.t1	227086.JGI_V11_86822	4.3e-30	138.3	Eukaryota	GO:0000003,GO:0000166,GO:0000228,GO:0000793,GO:0000794,GO:0000795,GO:0001505,GO:0003008,GO:0003674,GO:0005215,GO:0005488,GO:0005515,GO:0005524,GO:0005575,GO:0005622,GO:0005623,GO:0005634,GO:0005694,GO:0005737,GO:0005829,GO:0005856,GO:0005886,GO:0006810,GO:0006836,GO:0006887,GO:0006950,GO:0007154,GO:0007267,GO:0007268,GO:0007269,GO:0007274,GO:0007275,GO:0007399,GO:0007416,GO:0007528,GO:0007610,GO:…		ko:K15412,ko:K19941	ko05168,map05168				ko00000,ko00001,ko04131				Eukaryota	KOG3895@1,KOG3895@2759	NA|NA|NA	S
g|tr|g477194.t1	Foraminifera	743	2	GloG15_CONTIG180788:1-745(+)	PPA1	inorganic	211434	262740	318638	226440	364393	356003	315787	238928	153381	330960	186100	229782	324152	275928	282431	183334	>g|tr|g477194.t1	8128.ENSONIP00000023306	2e-39	169.5	Actinopterygii	GO:0003674,GO:0003824,GO:0004427,GO:0005575,GO:0005622,GO:0005623,GO:0005737,GO:0005829,GO:0006082,GO:0006139,GO:0006399,GO:0006412,GO:0006418,GO:0006518,GO:0006520,GO:0006725,GO:0006793,GO:0006796,GO:0006807,GO:0008150,GO:0008152,GO:0009058,GO:0009059,GO:0009987,GO:0010467,GO:0016070,GO:0016462,GO:0016787,GO:0016817,GO:0016818,GO:0019538,GO:0019752,GO:0034641,GO:0034645,GO:0034660,GO:0043038,GO:…	3.6.1.1	ko:K01507	ko00190,map00190				ko00000,ko00001,ko01000				Metazoa	38CDN@33154,3BBG1@33208,3CS2I@33213,4833K@7711,4960E@7742,49X90@7898,COG0221@1,KOG1626@2759	NA|NA|NA	C
g|tr|g477517.t1	Foraminifera	440	9	GloG15_CONTIG181046:1-499,576-1171(+)	CCT7	assists the folding of proteins upon ATP hydrolysis	1.87376e+06	1.35613e+06	735993	1.09372e+06	1.57833e+06	1.80282e+06	2.07652e+06	1.66771e+06	1.6111e+06	1.362e+06	798357	644329	1.44245e+06	1.1898e+06	1.58969e+06	1.47275e+06	>g|tr|g477517.t1	164328.Phyra53278	8.1e-122	443.7	Peronosporales	GO:0000003,GO:0002199,GO:0003674,GO:0005488,GO:0005515,GO:0005575,GO:0005622,GO:0005623,GO:0005737,GO:0005829,GO:0005832,GO:0005856,GO:0005874,GO:0005886,GO:0006457,GO:0006458,GO:0006810,GO:0007338,GO:0007339,GO:0008037,GO:0008150,GO:0009566,GO:0009889,GO:0009891,GO:0009893,GO:0009987,GO:0009988,GO:0010035,GO:0010038,GO:0010556,GO:0010557,GO:0010604,GO:0010638,GO:0015630,GO:0016020,GO:0016043,GO:…		ko:K09499					ko00000,ko03110,ko04147				Eukaryota	3Q7I3@4776,COG0459@1,KOG0361@2759	NA|NA|NA	O
g|tr|g478025.t1	Foraminifera	505	1	GloG15_CONTIG181457:488-1445,1520-1579(+)		4-aminobutyrate:pyruvate transaminase activity	89204.3	124962	180443	122516	112039	321503	255756	138510	55016.1	167628	9764.88	41200.8	87555.8	35419.7	174272	145057	>g|tr|g478025.t1	227086.JGI_V11_54520	7.1e-96	357.5	Eukaryota												Eukaryota	COG0160@1,KOG1404@2759	NA|NA|NA	E
g|tr|g480020.t1	Foraminifera	814	1	GloG15_CONTIG183058:1-665(-)		protein serine/threonine kinase activity	9321.03	26452.3	32138.9	26633.9	32017.4	21296.3	44448.9	15147.2	16792.9	33814.2	33199.5	33700.9	44655.3	30023.9	3719.2	22655.9	>g|tr|g480020.t1	5888.CAK58441	1.7e-13	83.2	Eukaryota		2.7.11.1	ko:K13412	ko04626,ko05145,map04626,map05145				ko00000,ko00001,ko01000,ko01001				Eukaryota	KOG0032@1,KOG0032@2759	NA|NA|NA	T
g|tr|g480021.t1	Foraminifera	781	2	GloG15_CONTIG183058:864-1570(+)	EHD4	endocytic recycling	219598	221488	81975.1	191753	190997	221660	187800	410690	280676	240233	212212	296072	187974	287664	230787	279037	>g|tr|g480021.t1	529818.AMSG_05001T0	2.3e-85	322.0	Eukaryota	GO:0000003,GO:0001654,GO:0001745,GO:0001751,GO:0001754,GO:0001881,GO:0001932,GO:0001934,GO:0002009,GO:0002165,GO:0003002,GO:0003006,GO:0003407,GO:0003674,GO:0003676,GO:0003824,GO:0005488,GO:0005515,GO:0005575,GO:0005576,GO:0005622,GO:0005623,GO:0005634,GO:0005737,GO:0005768,GO:0005769,GO:0005783,GO:0005811,GO:0005829,GO:0005856,GO:0005886,GO:0005901,GO:0005911,GO:0005929,GO:0006810,GO:0006886,GO:…		ko:K12469,ko:K12476,ko:K12477,ko:K12483	ko04144,map04144				ko00000,ko00001,ko04131,ko04147				Eukaryota	KOG1954@1,KOG1954@2759	NA|NA|NA	S
g|tr|g480173.t1	Foraminifera	586	3	GloG15_CONTIG183179:1-326,389-478,542-821,875-1089(-)			69523.3	278610	227960	209860	206794	231908	342968	96107.4	168388	478209	191268	108685	671705	127755	259762	159358
g|tr|g480689.t1	Foraminifera	758	1	GloG15_CONTIG183605:770-1307,1380-1567(+)			12319	125327	114493	128139	77784.2	38752.6	42119	44957.4	66338.8	143869	121518	156445	141074	103690	796.623	91301
g|tr|g481090.t1	Foraminifera	715	1	GloG15_CONTIG183919:258-601,663-1086(+)	EIF4E	Belongs to the eukaryotic initiation factor 4E family	175620	433101	446475	450775	677324	681625	888532	174269	133333	501704	180020	81662.5	829468	108185	178844	200665	>g|tr|g481090.t1	88036.EFJ08394	2.9e-33	149.1	Streptophyta	GO:0000932,GO:0005575,GO:0005622,GO:0005623,GO:0005634,GO:0005730,GO:0005737,GO:0005845,GO:0008150,GO:0009605,GO:0009607,GO:0009615,GO:0010494,GO:0031974,GO:0031981,GO:0032991,GO:0034518,GO:0035770,GO:0036464,GO:0043207,GO:0043226,GO:0043227,GO:0043228,GO:0043229,GO:0043231,GO:0043232,GO:0043233,GO:0044422,GO:0044424,GO:0044428,GO:0044444,GO:0044446,GO:0044464,GO:0050896,GO:0051704,GO:0051707,GO:…		ko:K03259	ko01521,ko03013,ko04066,ko04150,ko04151,ko04211,ko04910,map01521,map03013,map04066,map04150,map04151,map04211,map04910	M00428			ko00000,ko00001,ko00002,ko03012,ko03019				Viridiplantae	37MM7@33090,3GDV6@35493,COG5053@1,KOG1670@2759	NA|NA|NA	J
g|tr|g481223.t1	Foraminifera	744	4	GloG15_CONTIG184025:1-239,397-428,529-997(-)		Rpp20 subunit of nuclear RNase MRP and P	144344	428060	768010	474935	459559	412514	533805	242894	190237	384410	313509	579730	483361	251430	225288	260391	>g|tr|g481223.t1	3983.cassava4.1_015161m	1.2e-12	80.5	Streptophyta												Viridiplantae	37Z3S@33090,3GHJ5@35493,KOG2567@1,KOG2567@2759	NA|NA|NA	S
g|tr|g482839.t1	Foraminifera	375	2	GloG15_CONTIG185297:190-576,648-1136,1228-1558(+)	SSE1	MreB/Mbl protein	293069	334728	255081	298389	450259	396293	462603	248171	427109	353921	254534	645049	485640	234098	376303	287309	>g|tr|g482839.t1	78898.MVEG_09240T0	9.4e-71	274.2	Fungi incertae sedis	GO:0000166,GO:0000774,GO:0003674,GO:0005488,GO:0005524,GO:0005575,GO:0005622,GO:0005623,GO:0005737,GO:0005829,GO:0005844,GO:0006457,GO:0008144,GO:0008150,GO:0009405,GO:0009987,GO:0017076,GO:0030234,GO:0030554,GO:0032553,GO:0032555,GO:0032559,GO:0032991,GO:0033218,GO:0035639,GO:0035690,GO:0036094,GO:0042026,GO:0042221,GO:0042277,GO:0042493,GO:0043167,GO:0043168,GO:0044419,GO:0044424,GO:0044444,GO:…		ko:K09485,ko:K09489	ko04141,ko04530,ko04612,map04141,map04530,map04612				ko00000,ko00001,ko03110	1.A.33			Fungi	1GT9N@112252,38HTW@33154,3NV9J@4751,COG0443@1,KOG0103@2759	NA|NA|NA	O
g|tr|g483566.t1	Foraminifera	1042	1	GloG15_CONTIG185892:589-930,1001-1111(+)		Belongs to the ubiquitin-conjugating enzyme family	139128	137768	130220	135283	119832	99136	156053	214237	163852	149837	113648	49279.6	133403	160454	88059.4	192861	>g|tr|g483566.t1	45151.EDU48517	6.6e-46	190.3	Pleosporales	GO:0000209,GO:0003674,GO:0003824,GO:0004842,GO:0005488,GO:0005515,GO:0005575,GO:0005622,GO:0005623,GO:0005634,GO:0005737,GO:0006139,GO:0006259,GO:0006281,GO:0006301,GO:0006464,GO:0006513,GO:0006725,GO:0006807,GO:0006950,GO:0006974,GO:0008104,GO:0008150,GO:0008152,GO:0009314,GO:0009411,GO:0009416,GO:0009628,GO:0009987,GO:0010992,GO:0010994,GO:0016043,GO:0016567,GO:0016740,GO:0019538,GO:0019725,GO:…	2.3.2.23	ko:K10580	ko04120,ko04624,map04120,map04624				ko00000,ko00001,ko01000,ko03400,ko04121				Fungi	201JP@147541,39ZUE@33154,3P1WC@4751,3QQCZ@4890,4KEP8@92860,COG5078@1,KOG0417@2759	NA|NA|NA	O
g|tr|g484922.t1	Foraminifera	394	1	GloG15_CONTIG186987:1-714,789-1246(+)	DGA1	diacylglycerol	156310	145442	160816	149717	149621	270147	282895	143857	254121	205041	172066	196532	268898	221038	197605	244291	>g|tr|g484922.t1	109760.SPPG_01328T0	2.4e-63	249.6	Fungi	GO:0003674,GO:0003824,GO:0004144,GO:0005575,GO:0005622,GO:0005623,GO:0005737,GO:0005783,GO:0005811,GO:0006629,GO:0006638,GO:0006639,GO:0006641,GO:0006643,GO:0006665,GO:0006672,GO:0006807,GO:0006996,GO:0008150,GO:0008152,GO:0008374,GO:0008610,GO:0009058,GO:0009987,GO:0010876,GO:0010883,GO:0010884,GO:0012505,GO:0016020,GO:0016021,GO:0016043,GO:0016411,GO:0016740,GO:0016746,GO:0016747,GO:0019432,GO:…	2.3.1.22	ko:K14457,ko:K14458	ko00561,ko04975,map00561,map04975		R03755,R03756	RC00004,RC00037	ko00000,ko00001,ko01000				Fungi	38BMV@33154,3NX4Z@4751,KOG0831@1,KOG0831@2759	NA|NA|NA	I
g|tr|g485094.t1	Foraminifera	525	1	GloG15_CONTIG187119:458-1441(-)		UDP-glucose 4-epimerase activity	17021.7	10617.5	1360.82	4222.29	13524.7	25759	52398.2	28924.1	16022.6	7993.86	23849.5	31266.3	26153	10454.2	18475.2	17221.3	>g|tr|g485094.t1	946362.XP_004989675.1	8.2e-65	254.2	Opisthokonta		5.1.3.2	ko:K01784	ko00052,ko00520,ko01100,map00052,map00520,map01100	M00361,M00362,M00632	R00291,R02984	RC00289	ko00000,ko00001,ko00002,ko01000				Opisthokonta	38C46@33154,COG1087@1,KOG1371@2759	NA|NA|NA	M
g|tr|g485833.t1	Foraminifera	543	5	GloG15_CONTIG187720:156-1112(+)		alcohol dehydrogenase (NAD) activity	1.24767e+06	953567	460024	769516	1.31901e+06	1.1386e+06	575651	1.70971e+06	1.51148e+06	1.19432e+06	1.24735e+06	746847	985682	1.32098e+06	1.36401e+06	1.35141e+06	>g|tr|g485833.t1	2850.Phatr34853	1.4e-101	376.3	Eukaryota												Eukaryota	COG1028@1,KOG4169@2759	NA|NA|NA	IQ
g|tr|g487248.t1	Foraminifera	379	1	GloG15_CONTIG188869:1-1202(+)		annexin A6	75185.2	22478.1	78614.9	46312.7	107727	25552.6	52738.2	40666.7	22143.4	72422.4	36659.5	270331	12122.2	49598.3	7281.18	41045.7	>g|tr|g487248.t1	7668.SPU_019139-tr	7.2e-47	194.9	Bilateria			ko:K17095					ko00000,ko04147	1.A.31.1.1,1.A.31.1.6			Metazoa	38FEE@33154,3BCMH@33208,3CXS1@33213,KOG0819@1,KOG0819@2759	NA|NA|NA	U
g|tr|g487357.t1	Foraminifera	508	1	GloG15_CONTIG188957:15-1028(+)	CA13	Carbonic anhydrase	646198	619951	1.00872e+06	714598	128791	134586	226271	266269	175322	153744	5.22767e+06	1.13878e+06	98807.6	1.04528e+06	247622	96855.2	>g|tr|g487357.t1	244447.XP_008306375.1	9.1e-27	127.9	Actinopterygii	GO:0003674,GO:0003824,GO:0004089,GO:0005575,GO:0005622,GO:0005623,GO:0005737,GO:0005829,GO:0006730,GO:0006810,GO:0006811,GO:0006820,GO:0008150,GO:0008152,GO:0009987,GO:0015701,GO:0015711,GO:0016829,GO:0016835,GO:0016836,GO:0043209,GO:0043226,GO:0043227,GO:0043229,GO:0043231,GO:0044237,GO:0044281,GO:0044424,GO:0044444,GO:0044464,GO:0051179,GO:0051234,GO:0071702	4.2.1.1	ko:K01672,ko:K18245	ko00910,ko04964,ko04966,ko04971,ko04972,ko04976,map00910,map04964,map04966,map04971,map04972,map04976		R00132,R10092	RC02807	ko00000,ko00001,ko01000,ko04147				Metazoa	38BFG@33154,3BIMZ@33208,3CTN7@33213,480DH@7711,495H5@7742,49TIS@7898,COG3338@1,KOG0382@2759	NA|NA|NA	P
g|tr|g489385.t1	Foraminifera	338	2	GloG15_CONTIG190609:195-950,1031-1525(-)	LYS1	saccharopine dehydrogenase activity	380821	186695	263224	190508	185101	289845	361907	192006	393573	231079	203968	483563	346370	217017	236294	136134	>g|tr|g489385.t1	227086.JGI_V11_55349	4.6e-97	361.7	Eukaryota	GO:0003674,GO:0003676,GO:0003723,GO:0003729,GO:0003824,GO:0004753,GO:0004754,GO:0005488,GO:0005575,GO:0005622,GO:0005623,GO:0005737,GO:0006082,GO:0006091,GO:0006520,GO:0006553,GO:0006807,GO:0008150,GO:0008152,GO:0008652,GO:0009058,GO:0009066,GO:0009067,GO:0009085,GO:0009987,GO:0016053,GO:0016491,GO:0016645,GO:0016646,GO:0019752,GO:0019878,GO:0043436,GO:0044237,GO:0044238,GO:0044249,GO:0044281,GO:…	1.5.1.7,3.4.19.12	ko:K00290,ko:K11874	ko00300,ko00310,ko01100,ko01110,ko01130,ko01230,map00300,map00310,map01100,map01110,map01130,map01230	M00030,M00032	R00715	RC00217,RC01532	ko00000,ko00001,ko00002,ko01000,ko01002,ko04121				Eukaryota	COG1748@1,KOG0172@2759	NA|NA|NA	E
g|tr|g489596.t1	Foraminifera	1043	6	GloG15_CONTIG190786:1013-1380,1447-1530(+)		Glutamate/Leucine/Phenylalanine/Valine dehydrogenase	1.02434e+06	1.37376e+06	504503	1.01684e+06	1.10875e+06	907332	693003	1.55353e+06	1.44126e+06	853895	531609	449228	838762	1.6039e+06	973233	852843	>g|tr|g489596.t1	7719.XP_009858550.1	2.6e-42	178.3	Chordata		1.4.1.3,1.4.1.4	ko:K00261,ko:K00262	ko00220,ko00250,ko00471,ko00910,ko01100,ko01200,ko04217,ko04964,map00220,map00250,map00471,map00910,map01100,map01200,map04217,map04964	M00740	R00243,R00248	RC00006,RC02799	ko00000,ko00001,ko00002,ko01000,ko04147				Metazoa	38GEK@33154,3BKKN@33208,3D5YW@33213,48IFU@7711,COG0334@1,KOG2250@2759	NA|NA|NA	E
g|tr|g490778.t1	Foraminifera	540	3	GloG15_CONTIG191747:417-1042,1104-1437(-)	G6PD	Catalyzes the rate-limiting step of the oxidative pentose-phosphate pathway, which represents a route for the dissimilation of carbohydrates besides glycolysis	10394.7	94657.4	5574.34	58577.6	93618	49561.3	90803.8	34607.4	8728.59	176564	44005.9	12135.8	128196	30126.9	30814.6	38246.3	>g|tr|g490778.t1	32507.XP_006796576.1	5.5e-82	311.2	Actinopterygii	GO:0000166,GO:0001558,GO:0001816,GO:0001990,GO:0001998,GO:0002033,GO:0002034,GO:0002262,GO:0002376,GO:0002520,GO:0003008,GO:0003013,GO:0003014,GO:0003018,GO:0003044,GO:0003071,GO:0003072,GO:0003073,GO:0003081,GO:0003084,GO:0003085,GO:0003674,GO:0003824,GO:0004345,GO:0005488,GO:0005515,GO:0005536,GO:0005575,GO:0005622,GO:0005623,GO:0005634,GO:0005737,GO:0005829,GO:0005886,GO:0005975,GO:0005996,GO:…	1.1.1.363,1.1.1.49	ko:K00036	ko00030,ko00480,ko01100,ko01110,ko01120,ko01130,ko01200,ko05230,map00030,map00480,map01100,map01110,map01120,map01130,map01200,map05230	M00004,M00006,M00008	R00835,R02736,R10907	RC00001,RC00066	ko00000,ko00001,ko00002,ko01000,ko04147				Metazoa	38E2A@33154,3BAST@33208,3CVRS@33213,485HH@7711,495PR@7742,49ZX0@7898,COG0364@1,KOG0563@2759	NA|NA|NA	G
g|tr|g491226.t1	Foraminifera	267	1	GloG15_CONTIG192103:1-758,817-1471(-)		alpha-1,3-glucosidase activity	20692.8	0	1415.94	673.809	2327.57	3451.4	0	2534.86	4820.3	2865.4	7389.51	3847.69	3521.17	1680.23	0	5730.1	>g|tr|g491226.t1	44056.XP_009037033.1	4.5e-72	278.9	Eukaryota												Eukaryota	COG1501@1,KOG1066@2759	NA|NA|NA	G
g|tr|g491781.t1	Foraminifera	497	2	GloG15_CONTIG192542:10-1032(+)	hppA	pump that utilizes the energy of pyrophosphate hydrolysis as the driving force for	780402	407374	282484	375797	410974	441338	301432	852144	558448	484684	344173	487572	458179	570947	381500	447142	>g|tr|g491781.t1	340099.Teth39_1590	3.8e-73	282.0	Thermoanaerobacterales		3.6.1.1	ko:K15987	ko00190,map00190				ko00000,ko00001,ko01000	3.A.10.1			Bacteria	1TNZI@1239,248KS@186801,42EN1@68295,COG3808@1,COG3808@2	NA|NA|NA	C
g|tr|g491799.t1	Foraminifera	257	8	GloG15_CONTIG192560:1-230,291-1495(+)	NDUFS1	NADH dehydrogenase (quinone) activity	143789	468447	345610	452315	388892	289404	689165	180641	201801	361650	361029	400519	558417	224746	174956	267759	>g|tr|g491799.t1	227086.JGI_V11_46295	1.2e-154	553.1	Eukaryota	GO:0003674,GO:0003824,GO:0003954,GO:0005488,GO:0005575,GO:0005622,GO:0005623,GO:0005737,GO:0005739,GO:0005740,GO:0005743,GO:0005746,GO:0005747,GO:0005758,GO:0005759,GO:0006091,GO:0006119,GO:0006120,GO:0006139,GO:0006163,GO:0006725,GO:0006753,GO:0006793,GO:0006796,GO:0006807,GO:0006915,GO:0006950,GO:0006979,GO:0006996,GO:0007005,GO:0008137,GO:0008150,GO:0008152,GO:0008219,GO:0008637,GO:0009055,GO:…	1.6.5.3,1.6.99.3	ko:K03934	ko00190,ko01100,ko04714,ko04723,ko04932,ko05010,ko05012,ko05016,map00190,map01100,map04714,map04723,map04932,map05010,map05012,map05016	M00143	R11945	RC00061	ko00000,ko00001,ko00002,ko01000	3.D.1.6			Eukaryota	COG1034@1,KOG2282@2759	NA|NA|NA	C
g|tr|g491894.t1	Foraminifera	447	6	GloG15_CONTIG192635:164-239,302-360,424-905,1052-1520(+)	cpgS	cyclic 2,3-diphosphoglycerate synthetase activity	212039	566734	461478	596184	637459	380172	761739	824581	480950	573844	545825	905788	544885	649964	249816	355412	>g|tr|g491894.t1	945713.IALB_2168	3.3e-123	448.4	Bacteria			ko:K05716			R03298	RC00900	ko00000,ko01000				Bacteria	COG2403@1,COG2403@2	NA|NA|NA	S
g|tr|g495660.t1	Foraminifera	759	2	GloG15_CONTIG195716:1-729(+)	UMPS	orotate phosphoribosyltransferase activity	951807	647150	644775	666413	1.01731e+06	1.17139e+06	1.56714e+06	1.19161e+06	683413	619242	311623	564113	1.11763e+06	514726	928828	690225	>g|tr|g495660.t1	10224.XP_002735881.1	9.3e-74	283.5	Bilateria	GO:0003674,GO:0003824,GO:0004588,GO:0004590,GO:0005488,GO:0005515,GO:0005575,GO:0005622,GO:0005623,GO:0005634,GO:0005737,GO:0005829,GO:0006139,GO:0006206,GO:0006207,GO:0006213,GO:0006220,GO:0006221,GO:0006222,GO:0006725,GO:0006753,GO:0006793,GO:0006796,GO:0006807,GO:0008150,GO:0008152,GO:0009058,GO:0009112,GO:0009116,GO:0009117,GO:0009119,GO:0009123,GO:0009124,GO:0009129,GO:0009130,GO:0009156,GO:…	2.4.2.10,4.1.1.23	ko:K13421	ko00240,ko00983,ko01100,map00240,map00983,map01100	M00051	R00965,R01870,R08231	RC00063,RC00409,RC00611	ko00000,ko00001,ko00002,ko01000				Metazoa	38EAF@33154,3B9I3@33208,3CTV1@33213,COG0461@1,KOG1377@2759	NA|NA|NA	F
g|tr|g495668.t1	Foraminifera	509	4	GloG15_CONTIG195721:392-1405(-)	ASNS	Asparagine synthetase (glutamine-hydrolyzing)	367804	334715	292578	237998	293733	191833	210749	468419	536140	433612	254376	105149	177280	387039	228082	237638	>g|tr|g495668.t1	9767.XP_007164855.1	8.9e-91	340.5	Cetartiodactyla	GO:0001101,GO:0001889,GO:0003674,GO:0003824,GO:0004066,GO:0005488,GO:0005515,GO:0005575,GO:0005622,GO:0005623,GO:0005737,GO:0005829,GO:0006082,GO:0006520,GO:0006528,GO:0006529,GO:0006807,GO:0006950,GO:0006984,GO:0006986,GO:0007154,GO:0007165,GO:0007275,GO:0007346,GO:0008150,GO:0008152,GO:0008652,GO:0009058,GO:0009066,GO:0009067,GO:0009267,GO:0009314,GO:0009416,GO:0009605,GO:0009612,GO:0009628,GO:…	6.3.5.4	ko:K01953	ko00250,ko01100,ko01110,map00250,map01100,map01110		R00578	RC00010	ko00000,ko00001,ko01000,ko01002				Mammalia	38H99@33154,3BECT@33208,3CXBR@33213,3J4PC@40674,480MI@7711,48ZD5@7742,4J2SK@91561,COG0367@1,KOG0571@2759	NA|NA|NA	E
g|tr|g497980.t1	Foraminifera	889	1	GloG15_CONTIG197648:94-175,230-733,804-826(-)		Signal recognition particle receptor beta subunit	278781	181124	154008	146852	154221	139547	46116.8	313355	331196	183657	239030	365041	111431	308708	299454	190085	>g|tr|g497980.t1	99158.XP_008883184.1	2.7e-58	231.9	Sarcocystidae			ko:K07874	ko05134,map05134				ko00000,ko00001,ko04031,ko04131,ko04147				Apicomplexa	3YA22@5794,3YM2P@5796,3YS73@5809,KOG0084@1,KOG0084@2759	NA|NA|NA	U
g|tr|g501314.t1	Foraminifera	1080	1	GloG15_CONTIG200447:944-1156,1223-1316,1381-1484(+)		Plectin/S10 domain	133566	240204	488300	264077	562758	618878	416947	169116	209658	1.04047e+06	59145.9	331885	2.48264e+06	167256	392911	180780	>g|tr|g501314.t1	4555.Si003081m	8.2e-27	126.7	Poales	GO:0000028,GO:0001763,GO:0003674,GO:0003676,GO:0003723,GO:0003729,GO:0003735,GO:0005198,GO:0005488,GO:0005575,GO:0005618,GO:0005622,GO:0005623,GO:0005737,GO:0005829,GO:0005840,GO:0005844,GO:0006996,GO:0007275,GO:0008150,GO:0009507,GO:0009536,GO:0009653,GO:0009888,GO:0009933,GO:0009987,GO:0010014,GO:0010016,GO:0010223,GO:0010252,GO:0010346,GO:0015935,GO:0016020,GO:0016043,GO:0022603,GO:0022607,GO:…		ko:K02947,ko:K09422	ko03010,map03010	M00177			br01610,ko00000,ko00001,ko00002,ko03000,ko03011				Viridiplantae	37IV7@33090,3GAKP@35493,3I2NS@38820,3M2C4@4447,COG5045@1,KOG3344@2759	NA|NA|NA	J
g|tr|g502292.t1	Foraminifera	872	4	GloG15_CONTIG201267:395-755,814-1073(-)	RPS5	Belongs to the universal ribosomal protein uS7 family	517259	1.93507e+06	1.39421e+06	1.81047e+06	1.90107e+06	1.00235e+06	1.81056e+06	1.06567e+06	587827	1.60802e+06	1.05268e+06	1.43378e+06	1.79465e+06	997935	731458	1.00295e+06	>g|tr|g502292.t1	554065.XP_005843972.1	3.2e-59	235.0	Chlorophyta	GO:0000028,GO:0003674,GO:0003676,GO:0003723,GO:0003729,GO:0003735,GO:0005198,GO:0005488,GO:0005575,GO:0005618,GO:0005622,GO:0005623,GO:0005737,GO:0005773,GO:0005774,GO:0005829,GO:0005840,GO:0005844,GO:0005886,GO:0005911,GO:0006412,GO:0006518,GO:0006807,GO:0006996,GO:0008150,GO:0008152,GO:0009058,GO:0009059,GO:0009506,GO:0009507,GO:0009536,GO:0009719,GO:0009725,GO:0009735,GO:0009987,GO:0010033,GO:…		ko:K02989	ko03010,map03010	M00177			br01610,ko00000,ko00001,ko00002,ko03011				Viridiplantae	34GXI@3041,37Q1Y@33090,COG0049@1,KOG3291@2759	NA|NA|NA	J
g|tr|g502445.t1	Foraminifera	436	2	GloG15_CONTIG201401:24-497,561-1190(-)		fructose-bisphosphate aldolase	1.64332e+06	1.87488e+06	1.54712e+06	2.01412e+06	1.66491e+06	1.95969e+06	2.5671e+06	2.59911e+06	2.14525e+06	1.41905e+06	650596	588641	721932	1.40896e+06	2.02024e+06	2.00013e+06	>g|tr|g502445.t1	264402.Cagra.0154s0033.1.p	1.6e-80	306.6	Brassicales	GO:0003674,GO:0003824,GO:0004332,GO:0005575,GO:0005622,GO:0005623,GO:0005737,GO:0005829,GO:0005975,GO:0005996,GO:0006006,GO:0006082,GO:0006090,GO:0006091,GO:0006094,GO:0006096,GO:0006139,GO:0006163,GO:0006164,GO:0006165,GO:0006725,GO:0006732,GO:0006733,GO:0006753,GO:0006754,GO:0006757,GO:0006793,GO:0006796,GO:0006807,GO:0008150,GO:0008152,GO:0009056,GO:0009058,GO:0009108,GO:0009117,GO:0009123,GO:…	4.1.2.13	ko:K01623	ko00010,ko00030,ko00051,ko00680,ko00710,ko01100,ko01110,ko01120,ko01130,ko01200,ko01230,map00010,map00030,map00051,map00680,map00710,map01100,map01110,map01120,map01130,map01200,map01230	M00001,M00003,M00165,M00167	R01068,R01070,R01829,R02568	RC00438,RC00439,RC00603,RC00604	ko00000,ko00001,ko00002,ko01000,ko03036,ko04131,ko04147				Viridiplantae	37KBJ@33090,3GDDU@35493,3HVBS@3699,COG3588@1,KOG1557@2759	NA|NA|NA	G
g|tr|g504645.t1	Foraminifera	740	3	GloG15_CONTIG203273:724-1471(-)			2.90956e+06	2.58282e+06	2.64799e+06	2.78299e+06	3.42542e+06	4.16584e+06	5.23892e+06	3.14622e+06	2.24128e+06	2.75731e+06	2.66947e+06	3.20328e+06	3.31337e+06	2.36359e+06	2.6184e+06	2.73809e+06
g|tr|g506047.t1	Foraminifera	385	12	GloG15_CONTIG204459:50-505,555-1286(+)	PSMC5	proteasome-activating ATPase activity	130102	344986	444508	347222	378314	232639	574966	187614	183271	475159	419772	336100	542345	169960	189134	162961	>g|tr|g506047.t1	227086.JGI_V11_38950	7.1e-172	610.1	Eukaryota	GO:0000166,GO:0000428,GO:0000502,GO:0001664,GO:0003674,GO:0003824,GO:0004175,GO:0004176,GO:0005102,GO:0005488,GO:0005515,GO:0005524,GO:0005575,GO:0005622,GO:0005623,GO:0005634,GO:0005654,GO:0005667,GO:0005675,GO:0005737,GO:0005829,GO:0005838,GO:0005886,GO:0006139,GO:0006259,GO:0006281,GO:0006289,GO:0006325,GO:0006338,GO:0006355,GO:0006357,GO:0006401,GO:0006464,GO:0006508,GO:0006511,GO:0006725,GO:…		ko:K03066	ko03050,ko05169,map03050,map05169	M00341			ko00000,ko00001,ko00002,ko03051				Eukaryota	COG0554@1,KOG0728@2759	NA|NA|NA	O
g|tr|g507029.t1	Foraminifera	403	2	GloG15_CONTIG205292:138-658,820-1456(-)		G-protein beta/gamma-subunit complex binding	394013	293103	324716	340621	227477	324108	364269	381092	507364	325966	224077	184559	346033	366935	680490	332784	>g|tr|g507029.t1	227086.JGI_V11_52805	6e-59	235.0	Eukaryota												Eukaryota	KOG0082@1,KOG0082@2759	NA|NA|NA	V
g|tr|g508709.t1	Foraminifera	299	15	GloG15_CONTIG206668:1-481,540-665,721-1456(+)		ubiquitin protein ligase binding	208483	545829	304345	443457	514260	426070	577817	446798	273750	493453	208497	250524	482908	258896	269954	383693	>g|tr|g508709.t1	227086.JGI_V11_46233	6.5e-89	334.7	Eukaryota												Eukaryota	COG5647@1,KOG2166@2759	NA|NA|NA	O
g|tr|g509134.t1	Foraminifera	269	4	GloG15_CONTIG207014:53-1455(+)		NADP transhydrogenase	1.4665e+06	1.59581e+06	591584	1.08962e+06	1.44524e+06	1.87564e+06	1.44115e+06	1.54973e+06	1.9928e+06	1.69768e+06	928036	766361	1.89257e+06	1.28565e+06	1.62261e+06	1.59021e+06	>g|tr|g509134.t1	7176.CPIJ003305-PA	5.7e-136	491.1	Nematocera		1.6.1.2	ko:K00323	ko00760,ko01100,map00760,map01100		R00112	RC00001	ko00000,ko00001,ko01000				Arthropoda	2QQ0A@2759,38CB0@33154,3BDQK@33208,3CWZ6@33213,3SFQ1@50557,41XXS@6656,450JW@7147,45BFB@7148,COG1282@1	NA|NA|NA	C
g|tr|g510679.t1	Foraminifera	1013	3	GloG15_CONTIG208306:261-357,417-575,693-928(+)	ATP6V0C	Proton-conducting pore forming subunit of the membrane integral V0 complex of vacuolar ATPase. V-ATPase is responsible for acidifying a variety of intracellular compartments in eukaryotic cells	9.77172e+06	8.55908e+06	5.16811e+06	7.8639e+06	6.22861e+06	7.35499e+06	3.78535e+06	9.82749e+06	1.02272e+07	8.07575e+06	6.9523e+06	2.50731e+06	6.02238e+06	1.12627e+07	9.79567e+06	9.91535e+06	>g|tr|g510679.t1	5911.EAR93669	2.2e-47	195.3	Ciliophora	GO:0000003,GO:0000041,GO:0000220,GO:0000322,GO:0000323,GO:0000324,GO:0000329,GO:0000331,GO:0001775,GO:0002252,GO:0002263,GO:0002274,GO:0002275,GO:0002283,GO:0002366,GO:0002376,GO:0002443,GO:0002444,GO:0002446,GO:0003674,GO:0003824,GO:0005215,GO:0005488,GO:0005515,GO:0005575,GO:0005622,GO:0005623,GO:0005737,GO:0005764,GO:0005765,GO:0005766,GO:0005768,GO:0005773,GO:0005774,GO:0005794,GO:0005886,GO:…	2.7.11.11	ko:K02155,ko:K04345,ko:K15542	ko00190,ko01100,ko01522,ko03015,ko04010,ko04014,ko04020,ko04024,ko04062,ko04113,ko04114,ko04138,ko04140,ko04142,ko04145,ko04211,ko04213,ko04261,ko04270,ko04310,ko04340,ko04341,ko04371,ko04530,ko04540,ko04611,ko04713,ko04714,ko04720,ko04721,ko04723,ko04724,ko04725,ko04726,ko04727,ko04728,ko04740,ko04742,ko04750,ko04910,ko04911,ko04912,ko04913,ko04914,ko04915,ko04916,ko04918,ko04919,ko04921,ko04922…	M00160,M00695			ko00000,ko00001,ko00002,ko01000,ko01001,ko03019,ko03036	3.A.2.2			Eukaryota	3ZBRS@5878,COG0636@1,KOG0232@2759	NA|NA|NA	P
g|tr|g512847.t1	Foraminifera	1132	1	GloG15_CONTIG210123:809-911,976-1084,1151-1226(-)	VAMP4	membrane protein 4	353985	308095	82370.1	188007	173273	161116	87063.7	299320	254019	225008	211845	0	125523	375466	258042	456690	>g|tr|g512847.t1	13735.ENSPSIP00000007340	2.3e-07	61.6	Testudines	GO:0000139,GO:0000149,GO:0000226,GO:0000323,GO:0002376,GO:0003674,GO:0005484,GO:0005488,GO:0005515,GO:0005575,GO:0005622,GO:0005623,GO:0005737,GO:0005764,GO:0005768,GO:0005773,GO:0005794,GO:0005802,GO:0005886,GO:0006810,GO:0006887,GO:0006892,GO:0006893,GO:0006906,GO:0006950,GO:0006952,GO:0006955,GO:0006996,GO:0007010,GO:0007017,GO:0007030,GO:0008021,GO:0008104,GO:0008150,GO:0009986,GO:0009987,GO:…		ko:K08513	ko04130,map04130				ko00000,ko00001,ko04131				Metazoa	3A3F0@33154,3BPPN@33208,3D67W@33213,48E1Z@7711,49B1T@7742,4C9IQ@8459,COG5143@1,KOG0860@2759	NA|NA|NA	U
g|tr|g513956.t1	Foraminifera	526	6	GloG15_CONTIG211085:392-703,768-1437(+)		Arylesterase	145180	189722	434431	298601	176197	208377	153396	265443	222238	272587	138290	356442	167684	204368	184382	257513	>g|tr|g513956.t1	929562.Emtol_0692	1.2e-18	100.9	Cytophagia		3.1.1.17	ko:K01053	ko00030,ko00053,ko00930,ko01100,ko01110,ko01120,ko01130,ko01200,ko01220,map00030,map00053,map00930,map01100,map01110,map01120,map01130,map01200,map01220	M00129	R01519,R02933,R03751	RC00537,RC00983	ko00000,ko00001,ko00002,ko01000,ko04147				Bacteria	47RTI@768503,4NNEW@976,COG3386@1,COG3386@2	NA|NA|NA	G
g|tr|g514638.t1	Foraminifera	599	9	GloG15_CONTIG211672:1-95,145-723,788-974,1036-1077(-)		S-adenosylmethionine synthase. Source PGD	605753	983274	781856	886843	1.15774e+06	1.86975e+06	2.56124e+06	821988	717011	861523	874618	660543	2.03343e+06	744698	785091	1.27698e+06	>g|tr|g514638.t1	115417.EPrPW00000014846	5.1e-114	417.5	Pythiales	GO:0000096,GO:0000098,GO:0000166,GO:0000287,GO:0003674,GO:0003824,GO:0004478,GO:0005488,GO:0005515,GO:0005524,GO:0005575,GO:0005622,GO:0005623,GO:0005634,GO:0005737,GO:0005829,GO:0006082,GO:0006520,GO:0006555,GO:0006556,GO:0006732,GO:0006790,GO:0006807,GO:0008144,GO:0008150,GO:0008152,GO:0009056,GO:0009058,GO:0009063,GO:0009066,GO:0009068,GO:0009087,GO:0009108,GO:0009987,GO:0016043,GO:0016054,GO:…	2.5.1.6	ko:K00789	ko00270,ko01100,ko01110,ko01230,map00270,map01100,map01110,map01230	M00034,M00035,M00368,M00609	R00177,R04771	RC00021,RC01211	ko00000,ko00001,ko00002,ko01000				Eukaryota	1MCS4@121069,COG0192@1,KOG1506@2759	NA|NA|NA	H
g|tr|g516327.t1	Foraminifera	668	4	GloG15_CONTIG213123:1-78,335-565,627-1124(-)	RAD23	XPC-binding domain	287233	255957	362925	289835	286893	344135	384054	243524	260760	160435	326829	700785	294380	323784	294290	334154	>g|tr|g516327.t1	36080.S2JKG0	1.4e-22	113.6	Fungi incertae sedis	GO:0000109,GO:0000111,GO:0000122,GO:0000502,GO:0003674,GO:0003676,GO:0003677,GO:0003684,GO:0005488,GO:0005515,GO:0005575,GO:0005622,GO:0005623,GO:0005634,GO:0005737,GO:0005739,GO:0006139,GO:0006259,GO:0006281,GO:0006289,GO:0006355,GO:0006357,GO:0006464,GO:0006508,GO:0006511,GO:0006517,GO:0006725,GO:0006807,GO:0006950,GO:0006974,GO:0008150,GO:0008152,GO:0009056,GO:0009057,GO:0009100,GO:0009889,GO:…		ko:K10839	ko03420,ko04141,map03420,map04141				ko00000,ko00001,ko03051,ko03400				Fungi	1GSIT@112252,38CFS@33154,3NWKD@4751,COG5272@1,KOG0011@2759	NA|NA|NA	L
g|tr|g517001.t1	Foraminifera	1075	1	GloG15_CONTIG213710:205-624(-)	TRX1	Belongs to the thioredoxin family	1.13878e+06	1.21377e+06	780603	1.12122e+06	1.50511e+06	1.49992e+06	1.72422e+06	1.66559e+06	1.46304e+06	1.26632e+06	1.06521e+06	838915	1.37101e+06	1.44084e+06	1.25498e+06	1.37597e+06	>g|tr|g517001.t1	4896.SPAC7D4.07c.1	6.9e-21	107.1	Taphrinomycotina	GO:0000011,GO:0000096,GO:0000097,GO:0000103,GO:0000302,GO:0000322,GO:0000323,GO:0000324,GO:0003674,GO:0003824,GO:0004791,GO:0005575,GO:0005622,GO:0005623,GO:0005634,GO:0005737,GO:0005739,GO:0005740,GO:0005758,GO:0005773,GO:0005829,GO:0006082,GO:0006464,GO:0006518,GO:0006520,GO:0006555,GO:0006575,GO:0006749,GO:0006790,GO:0006807,GO:0006810,GO:0006888,GO:0006890,GO:0006950,GO:0006979,GO:0006996,GO:…		ko:K03671	ko04621,ko05418,map04621,map05418				ko00000,ko00001,ko03110				Fungi	3A886@33154,3MCWQ@451866,3P5A0@4751,3QX8W@4890,COG0526@1,KOG0907@2759	NA|NA|NA	O
g|tr|g517535.t1	Foraminifera	410	3	GloG15_CONTIG214163:1-150,212-1208(+)	L3HYPDH	trans-L-3-hydroxyproline dehydratase activity	585511	639720	432900	587973	583565	550356	661057	633032	580467	581664	390106	663814	667062	515538	451111	473289	>g|tr|g517535.t1	8364.ENSXETP00000037091	1.1e-76	293.9	Vertebrata	GO:0003674,GO:0003824,GO:0016829,GO:0016835,GO:0016836	4.2.1.77	ko:K18384	ko00330,map00330		R04374	RC01139	ko00000,ko00001,ko01000				Metazoa	2QRPF@2759,38E8N@33154,3BBJY@33208,3CUYX@33213,4869I@7711,4930A@7742,COG3938@1	NA|NA|NA	E
g|tr|g518305.t1	Foraminifera	472	42	GloG15_CONTIG214799:284-1009,1095-1421(+)	atpD	Produces ATP from ADP in the presence of a proton gradient across the membrane. The catalytic sites are hosted primarily by the beta subunits	2.47412e+06	3.29116e+06	2.85149e+06	3.05742e+06	3.09967e+06	4.79916e+06	5.61816e+06	2.56927e+06	2.75498e+06	2.91126e+06	2.12066e+06	2.09027e+06	4.13015e+06	2.62436e+06	3.09873e+06	3.57996e+06	>g|tr|g518305.t1	269796.Rru_A1226	2.1e-66	259.6	Rhodospirillales	GO:0003674,GO:0003824,GO:0005215,GO:0005575,GO:0005622,GO:0005623,GO:0005886,GO:0006139,GO:0006163,GO:0006164,GO:0006725,GO:0006753,GO:0006754,GO:0006793,GO:0006796,GO:0006807,GO:0006810,GO:0006811,GO:0006812,GO:0008150,GO:0008152,GO:0008324,GO:0009058,GO:0009117,GO:0009123,GO:0009124,GO:0009126,GO:0009127,GO:0009141,GO:0009142,GO:0009144,GO:0009145,GO:0009150,GO:0009152,GO:0009156,GO:0009161,GO:…	3.6.3.14	ko:K02112	ko00190,ko00195,ko01100,map00190,map00195,map01100	M00157			ko00000,ko00001,ko00002,ko00194,ko01000	3.A.2.1		e_coli_core.b3732,iAF1260.b3732,iAPECO1_1312.APECO1_2729,iB21_1397.B21_03560,iBWG_1329.BWG_3423,iE2348C_1286.E2348C_4042,iEC042_1314.EC042_4119,iEC55989_1330.EC55989_4207,iECABU_c1320.ECABU_c42160,iECBD_1354.ECBD_4300,iECB_1328.ECB_03616,iECDH10B_1368.ECDH10B_3919,iECDH1ME8569_1439.ECDH1ME8569_3620,iECD_1391.ECD_03616,iECED1_1282.ECED1_4422,iECH74115_1262.ECH74115_5168,iECIAI1_1343.ECIAI1_3916,iE…	Bacteria	1MUFU@1224,2JQ4B@204441,2TRGP@28211,COG0055@1,COG0055@2	NA|NA|NA	C
g|tr|g519498.t1	Foraminifera	916	1	GloG15_CONTIG215846:1-586(+)	SCH9	AGC AKT protein kinase	5079.94	79475.2	125891	109415	117956	58598	73125.7	61030.6	58518.6	195815	13138.6	301946	112416	33191.8	26362.1	105324	>g|tr|g519498.t1	109760.SPPG_00618T0	2.9e-49	201.8	Fungi	GO:0000003,GO:0000166,GO:0000322,GO:0000323,GO:0000324,GO:0000329,GO:0001300,GO:0001302,GO:0001306,GO:0001323,GO:0001324,GO:0001410,GO:0003674,GO:0003824,GO:0004672,GO:0004674,GO:0005488,GO:0005524,GO:0005575,GO:0005622,GO:0005623,GO:0005634,GO:0005737,GO:0005773,GO:0005774,GO:0006355,GO:0006356,GO:0006357,GO:0006359,GO:0006464,GO:0006468,GO:0006793,GO:0006796,GO:0006807,GO:0006950,GO:0006979,GO:…	2.7.11.1	ko:K08286,ko:K19800	ko04138,ko04213,map04138,map04213				ko00000,ko00001,ko01000,ko01001				Fungi	38BVS@33154,3NUBB@4751,KOG0598@1,KOG0598@2759	NA|NA|NA	T
g|tr|g520247.t1	Foraminifera	612	2	GloG15_CONTIG216493:247-1137(-)	SOL1	Glucosamine-6-phosphate isomerases/6-phosphogluconolactonase	505195	159379	307751	288790	200029	174076	289515	411807	661235	291704	242983	27429	299726	373694	287458	310891	>g|tr|g520247.t1	36651.K9FVI4	1.2e-35	157.1	Eurotiales	GO:0003674,GO:0003824,GO:0005575,GO:0005622,GO:0005623,GO:0005634,GO:0005737,GO:0005829,GO:0006081,GO:0006098,GO:0006139,GO:0006403,GO:0006405,GO:0006409,GO:0006611,GO:0006725,GO:0006732,GO:0006733,GO:0006739,GO:0006753,GO:0006793,GO:0006796,GO:0006807,GO:0006810,GO:0006886,GO:0006913,GO:0008104,GO:0008150,GO:0008152,GO:0009051,GO:0009117,GO:0009987,GO:0015031,GO:0015833,GO:0015931,GO:0016787,GO:…	3.1.1.31	ko:K01057	ko00030,ko01100,ko01110,ko01120,ko01130,ko01200,map00030,map01100,map01110,map01120,map01130,map01200	M00004,M00006,M00008	R02035	RC00537	ko00000,ko00001,ko00002,ko01000				Fungi	20BX8@147545,39U1J@33154,3NY1P@4751,3QKGU@4890,3S2VC@5042,COG0363@1,KOG3147@2759	NA|NA|NA	G
g|tr|g520962.t1	Foraminifera	646	2	GloG15_CONTIG217110:524-1162,1222-1412(+)	NAPA	Attachment Protein	824628	880168	389118	767431	664707	837230	928767	980500	958877	744514	823961	355197	618191	966304	868626	912306	>g|tr|g520962.t1	400682.PAC_15717606	3.8e-31	142.1	Metazoa	GO:0000149,GO:0000278,GO:0000281,GO:0000910,GO:0001505,GO:0001654,GO:0001671,GO:0001745,GO:0002009,GO:0002090,GO:0002165,GO:0003674,GO:0005483,GO:0005488,GO:0005515,GO:0005575,GO:0005622,GO:0005623,GO:0005737,GO:0005773,GO:0005774,GO:0005829,GO:0006810,GO:0006836,GO:0006886,GO:0006887,GO:0006888,GO:0006890,GO:0006891,GO:0006897,GO:0006900,GO:0006901,GO:0006903,GO:0006906,GO:0006996,GO:0007049,GO:…		ko:K15296	ko04138,ko04721,map04138,map04721				ko00000,ko00001,ko04131				Metazoa	38GSG@33154,3BECS@33208,KOG1586@1,KOG1586@2759	NA|NA|NA	U
g|tr|g522174.t1	Foraminifera	565	1	GloG15_CONTIG218173:167-1038,1105-1171(-)	PHYH	Phytanoyl-CoA	106290	196071	264208	210242	227675	113757	285652	153221	145972	264830	626434	405279	426378	230217	121450	124778	>g|tr|g522174.t1	6500.XP_005092292.1	6.4e-67	261.2	Bilateria	GO:0001561,GO:0003674,GO:0003824,GO:0005488,GO:0005506,GO:0005575,GO:0005622,GO:0005623,GO:0005737,GO:0005777,GO:0005782,GO:0005829,GO:0006082,GO:0006103,GO:0006605,GO:0006625,GO:0006629,GO:0006631,GO:0006720,GO:0006810,GO:0006886,GO:0006996,GO:0007031,GO:0008104,GO:0008150,GO:0008152,GO:0008198,GO:0009056,GO:0009062,GO:0009987,GO:0015031,GO:0015833,GO:0016042,GO:0016043,GO:0016054,GO:0016491,GO:…	1.14.11.18	ko:K00477	ko04146,map04146				ko00000,ko00001,ko01000				Metazoa	38EX9@33154,3B9VM@33208,3CV1M@33213,COG5285@1,KOG3290@2759	NA|NA|NA	I
g|tr|g522343.t1	Foraminifera	949	1	GloG15_CONTIG218318:289-516,581-907(-)			759113	1.11661e+06	172928	900998	493115	698699	680972	742268	950485	857137	543907	116783	903600	1.08963e+06	719926	1.22895e+06
g|tr|g524847.t1	Foraminifera	694	2	GloG15_CONTIG220478:1-783(-)	LTA4H	leukotriene-A4 hydrolase activity	768503	540290	1.64271e+06	923785	684464	525740	644843	1.01119e+06	672533	666631	637474	347889	627645	783371	639397	551315	>g|tr|g524847.t1	7719.XP_002123481.1	2.9e-49	202.2	Chordata	GO:0001676,GO:0001775,GO:0002252,GO:0002263,GO:0002274,GO:0002275,GO:0002283,GO:0002366,GO:0002376,GO:0002443,GO:0002444,GO:0002446,GO:0003674,GO:0003824,GO:0004177,GO:0004301,GO:0004463,GO:0005488,GO:0005575,GO:0005576,GO:0005622,GO:0005623,GO:0005634,GO:0005654,GO:0005737,GO:0005829,GO:0006082,GO:0006508,GO:0006518,GO:0006629,GO:0006631,GO:0006633,GO:0006690,GO:0006691,GO:0006807,GO:0006810,GO:…	3.3.2.6	ko:K01254	ko00590,ko01100,map00590,map01100		R03057	RC00838	ko00000,ko00001,ko01000,ko01002				Metazoa	38DQ5@33154,3BF5Y@33208,3CSDH@33213,4891Q@7711,COG0308@1,KOG1047@2759	NA|NA|NA	EIOV
g|tr|g524965.t1	Foraminifera	815	4	GloG15_CONTIG220585:411-583,643-1135(+)	PSMB2	threonine-type endopeptidase activity	2.09784e+06	1.68787e+06	1.69831e+06	1.61394e+06	2.35942e+06	2.06287e+06	2.26645e+06	2.32615e+06	2.40933e+06	1.98802e+06	982136	2.74512e+06	2.08763e+06	1.88687e+06	2.34693e+06	1.97993e+06	>g|tr|g524965.t1	227086.JGI_V11_56713	5e-42	177.9	Eukaryota	GO:0000003,GO:0000502,GO:0003674,GO:0005575,GO:0005576,GO:0005622,GO:0005623,GO:0005634,GO:0005654,GO:0005737,GO:0005773,GO:0005774,GO:0005783,GO:0005789,GO:0005829,GO:0005839,GO:0005886,GO:0006464,GO:0006508,GO:0006511,GO:0006807,GO:0007088,GO:0007346,GO:0008047,GO:0008150,GO:0008152,GO:0009056,GO:0009057,GO:0009893,GO:0009896,GO:0009987,GO:0010033,GO:0010243,GO:0010498,GO:0010499,GO:0010564,GO:…	3.4.25.1	ko:K02734,ko:K08471,ko:K12847,ko:K18626	ko03040,ko03050,map03040,map03050	M00337,M00340,M00354			ko00000,ko00001,ko00002,ko01000,ko01002,ko03041,ko03051,ko04030,ko04812				Eukaryota	COG0638@1,KOG0177@2759	NA|NA|NA	O
g|tr|g527239.t1	Foraminifera	381	1	GloG15_CONTIG222540:1-1191(-)	THOP1	Thimet oligopeptidase	17392.7	22278.3	82351.3	48668	55950.8	40450	83315.4	41091.2	53748.3	78109.9	55627.3	70928.1	72099.2	45322.6	26353.9	22530.1	>g|tr|g527239.t1	29073.XP_008709612.1	3.1e-90	339.0	Carnivora	GO:0000209,GO:0003674,GO:0003824,GO:0004175,GO:0004222,GO:0005575,GO:0005622,GO:0005623,GO:0005737,GO:0005739,GO:0005740,GO:0005758,GO:0005829,GO:0006464,GO:0006508,GO:0006518,GO:0006807,GO:0008150,GO:0008152,GO:0008233,GO:0008237,GO:0009987,GO:0016567,GO:0016787,GO:0019538,GO:0031967,GO:0031970,GO:0031974,GO:0031975,GO:0032446,GO:0034641,GO:0036211,GO:0043170,GO:0043226,GO:0043227,GO:0043229,GO:…	3.4.24.15	ko:K01392	ko04614,ko05143,map04614,map05143				ko00000,ko00001,ko01000,ko01002				Mammalia	38SFI@33154,3B98M@33208,3CT8Z@33213,3EQ62@33554,3J5Q1@40674,47ZCM@7711,492KW@7742,COG0339@1,KOG2089@2759	NA|NA|NA	O
g|tr|g527343.t1	Foraminifera	798	2	GloG15_CONTIG222633:570-887,959-1268,1325-1383(+)	CHMP4C	vacuolar transport	1.7717e+06	2.0482e+06	1.05408e+06	1.76003e+06	1.8003e+06	1.78804e+06	1.36692e+06	2.27786e+06	1.69849e+06	2.07899e+06	1.12171e+06	2.54083e+06	1.40544e+06	1.2118e+06	1.69928e+06	1.36885e+06	>g|tr|g527343.t1	2880.D8LAT7	1.9e-07	63.2	Eukaryota	GO:0000003,GO:0000070,GO:0000075,GO:0000278,GO:0000280,GO:0000281,GO:0000815,GO:0000819,GO:0000902,GO:0000904,GO:0000910,GO:0000920,GO:0001894,GO:0001919,GO:0003006,GO:0003674,GO:0005215,GO:0005488,GO:0005515,GO:0005575,GO:0005622,GO:0005623,GO:0005634,GO:0005635,GO:0005737,GO:0005768,GO:0005770,GO:0005771,GO:0005829,GO:0005886,GO:0006508,GO:0006511,GO:0006605,GO:0006612,GO:0006620,GO:0006623,GO:…	2.1.1.309	ko:K12194,ko:K16075,ko:K17085,ko:K19306	ko04144,ko04217,map04144,map04217	M00412			ko00000,ko00001,ko00002,ko01000,ko02000,ko03009,ko04131,ko04147	1.A.35.5			Eukaryota	KOG1656@1,KOG1656@2759	NA|NA|NA	S
g|tr|g527769.t1	Foraminifera	620	7	GloG15_CONTIG223023:429-1304(-)	Hsc70-4	MreB/Mbl protein	585919	2.59598e+06	2.79406e+06	2.57307e+06	2.73829e+06	2.03515e+06	3.80308e+06	1.90292e+06	2.04031e+06	3.69351e+06	3.11415e+06	2.1723e+06	4.83574e+06	1.82407e+06	1.16083e+06	1.84614e+06	>g|tr|g527769.t1	121225.PHUM018540-PA	6.8e-79	300.8	Paraneoptera			ko:K03283	ko03040,ko04010,ko04141,ko04144,ko04213,ko04612,ko04915,ko05134,ko05145,ko05162,ko05164,ko05169,map03040,map04010,map04141,map04144,map04213,map04612,map04915,map05134,map05145,map05162,map05164,map05169	M00353,M00355			ko00000,ko00001,ko00002,ko01009,ko03009,ko03029,ko03041,ko03051,ko03110,ko04131,ko04147,ko04516	1.A.33.1			Arthropoda	38BSZ@33154,3BA18@33208,3CWU8@33213,3E94T@33342,3SHMF@50557,41TKD@6656,COG0443@1,KOG0101@2759	NA|NA|NA	O
g|tr|g527781.t1	Foraminifera	944	1	GloG15_CONTIG223033:335-898(-)		Scaffold protein Nfu/NifU N terminal	754827	622329	168779	471908	576397	475897	734560	480869	631425	399886	300735	564498	543583	375909	490054	479650	>g|tr|g527781.t1	7897.ENSLACP00000017055	2.8e-33	148.7	Vertebrata			ko:K22074					ko00000,ko03029				Metazoa	39X03@33154,3BFKN@33208,3D62X@33213,487MX@7711,49A06@7742,COG0694@1,KOG2358@2759	NA|NA|NA	O
g|tr|g528372.t1	Foraminifera	457	1	GloG15_CONTIG223555:1-668,744-1137,1194-1205(-)	OSM2	FAD dependent oxidoreductase	249397	663448	659549	709961	549348	714934	2.02878e+06	431265	300161	535403	622262	540079	1.37312e+06	396897	265145	494444	>g|tr|g528372.t1	82508.K1VUW5	8.6e-68	264.2	Tremellales	GO:0003674,GO:0003824,GO:0005575,GO:0005622,GO:0005623,GO:0005737,GO:0005739,GO:0005783,GO:0005829,GO:0005886,GO:0006082,GO:0006091,GO:0006099,GO:0006101,GO:0006106,GO:0006139,GO:0006457,GO:0006725,GO:0006732,GO:0006753,GO:0006793,GO:0006796,GO:0006807,GO:0006950,GO:0008150,GO:0008152,GO:0009060,GO:0009117,GO:0009628,GO:0009987,GO:0012505,GO:0015980,GO:0016020,GO:0016156,GO:0016491,GO:0016627,GO:…		ko:K18561					ko00000,ko01000			iMM904.YEL047C,iND750.YEL047C	Fungi	38FMG@33154,3NU5S@4751,3UY73@5204,3VE5Z@5234,COG1053@1,COG5274@1,KOG0537@2759,KOG2404@2759	NA|NA|NA	C
g|tr|g529297.t1	Foraminifera	676	9	GloG15_CONTIG224364:343-952,1037-1233(-)	phb2	Prohibitin-3	1.62647e+06	1.99851e+06	964785	1.56539e+06	1.84361e+06	2.23125e+06	1.72133e+06	2.24571e+06	1.92529e+06	1.7313e+06	1.10791e+06	958437	1.66251e+06	2.03296e+06	2.59383e+06	2.28399e+06	>g|tr|g529297.t1	4432.XP_010244518.1	1.8e-70	272.7	Streptophyta	GO:0000302,GO:0005575,GO:0005618,GO:0005622,GO:0005623,GO:0005634,GO:0005730,GO:0005737,GO:0005739,GO:0005740,GO:0005743,GO:0005746,GO:0005747,GO:0005773,GO:0005774,GO:0005886,GO:0006950,GO:0006970,GO:0006979,GO:0006996,GO:0007005,GO:0007275,GO:0008150,GO:0009505,GO:0009507,GO:0009536,GO:0009628,GO:0009651,GO:0009719,GO:0009723,GO:0009725,GO:0009733,GO:0009791,GO:0009987,GO:0010033,GO:0010035,GO:…		ko:K17080					ko00000,ko03029,ko04147				Viridiplantae	37KTT@33090,3G8SK@35493,COG0330@1,KOG3083@2759	NA|NA|NA	O
g|tr|g530484.t1	Foraminifera	682	11	GloG15_CONTIG225408:148-589,652-1010(+)		The proteasome is a multicatalytic proteinase complex which is characterized by its ability to cleave peptides with Arg, Phe, Tyr, Leu, and Glu adjacent to the leaving group at neutral or slightly basic pH	574203	1.3555e+06	1.01678e+06	1.14931e+06	1.45854e+06	1.1528e+06	1.8072e+06	1.2665e+06	889797	1.36012e+06	920663	1.22835e+06	1.39167e+06	1.04769e+06	716581	930600	>g|tr|g530484.t1	38833.XP_003059392.1	6.6e-65	254.2	Chlorophyta	GO:0000502,GO:0005575,GO:0005622,GO:0005623,GO:0005839,GO:0019773,GO:0032991,GO:0044424,GO:0044464,GO:1902494,GO:1905368,GO:1905369	3.4.25.1	ko:K02730	ko03050,map03050	M00337,M00340			ko00000,ko00001,ko00002,ko01000,ko01002,ko03051				Viridiplantae	34HB6@3041,37HRM@33090,COG0638@1,KOG0182@2759	NA|NA|NA	O
g|tr|g530714.t1	Foraminifera	283	5	GloG15_CONTIG225601:1-1378(+)	MUT	methylmalonyl-CoA mutase activity	647401	767354	549361	623674	729364	761529	667810	764142	765714	672352	555278	1.22974e+06	600568	837982	663865	834356	>g|tr|g530714.t1	7739.XP_002593783.1	1.6e-151	542.7	Chordata	GO:0000096,GO:0003674,GO:0003824,GO:0003924,GO:0004494,GO:0005488,GO:0005515,GO:0005575,GO:0005622,GO:0005623,GO:0005737,GO:0005739,GO:0005759,GO:0006082,GO:0006520,GO:0006725,GO:0006766,GO:0006767,GO:0006790,GO:0006807,GO:0007275,GO:0008144,GO:0008150,GO:0008152,GO:0009235,GO:0009791,GO:0009987,GO:0016462,GO:0016787,GO:0016817,GO:0016818,GO:0016853,GO:0016866,GO:0017111,GO:0017144,GO:0019752,GO:…	5.4.99.2	ko:K01847	ko00280,ko00630,ko00640,ko00720,ko01100,ko01120,ko01200,map00280,map00630,map00640,map00720,map01100,map01120,map01200	M00373,M00376,M00741	R00833	RC00395	ko00000,ko00001,ko00002,ko01000				Metazoa	2QQ7X@2759,38HNY@33154,3BABU@33208,3CTUG@33213,482MI@7711,COG1884@1	NA|NA|NA	I
g|tr|g533712.t1	Foraminifera	804	2	GloG15_CONTIG228257:52-729(-)	MSRA	peptide-methionine (S)-S-oxide reductase activity	475511	434287	411223	440236	468861	455515	554872	414922	351217	292757	376781	686034	319993	418320	388810	319231	>g|tr|g533712.t1	6500.XP_005107542.1	3.4e-62	245.0	Bilateria	GO:0000096,GO:0003674,GO:0003824,GO:0005575,GO:0005622,GO:0005623,GO:0005634,GO:0005654,GO:0005737,GO:0005739,GO:0005829,GO:0005856,GO:0006082,GO:0006464,GO:0006520,GO:0006555,GO:0006790,GO:0006807,GO:0006950,GO:0006979,GO:0007568,GO:0008113,GO:0008150,GO:0008152,GO:0009066,GO:0009987,GO:0015629,GO:0016020,GO:0016491,GO:0016667,GO:0016671,GO:0019538,GO:0019752,GO:0030091,GO:0031974,GO:0031981,GO:…	1.8.4.11	ko:K07304					ko00000,ko01000				Metazoa	39U04@33154,3BC3C@33208,3CZ0C@33213,COG0225@1,KOG1635@2759	NA|NA|NA	O
g|tr|g533716.t1	Foraminifera	631	14	GloG15_CONTIG228260:503-1360(-)	CCT4	protein binding involved in protein folding	764985	1.1074e+06	1.08689e+06	1.09077e+06	1.42887e+06	1.10293e+06	1.74264e+06	1.35334e+06	909837	1.17823e+06	761538	1.71311e+06	1.19499e+06	1.11486e+06	752846	991859	>g|tr|g533716.t1	7739.XP_002613480.1	3.6e-93	348.2	Chordata	GO:0000003,GO:0002199,GO:0003674,GO:0005488,GO:0005515,GO:0005575,GO:0005622,GO:0005623,GO:0005634,GO:0005654,GO:0005737,GO:0005813,GO:0005815,GO:0005829,GO:0005832,GO:0005856,GO:0005874,GO:0006403,GO:0006457,GO:0006458,GO:0006810,GO:0007275,GO:0007338,GO:0007339,GO:0008037,GO:0008150,GO:0009566,GO:0009653,GO:0009791,GO:0009886,GO:0009889,GO:0009891,GO:0009893,GO:0009987,GO:0009988,GO:0010171,GO:…		ko:K09496					ko00000,ko03036,ko03110,ko04147				Metazoa	39NW1@33154,3BCK9@33208,3CVW1@33213,47ZFR@7711,COG0459@1,KOG0358@2759	NA|NA|NA	O
g|tr|g536598.t1	Foraminifera	741	3	GloG15_CONTIG230746:615-1358(+)		microtubule binding	163592	486539	309646	453112	913449	279827	576113	469620	315463	605716	959448	216533	904579	660638	219959	547449	>g|tr|g536598.t1	5911.EAS02859	1.4e-11	77.0	Eukaryota		2.3.2.27	ko:K10599,ko:K18595,ko:K18597,ko:K18598	ko03040,ko04120,map03040,map04120	M00353,M00355			ko00000,ko00001,ko00002,ko01000,ko03041,ko03400,ko04121,ko04812				Eukaryota	COG2319@1,KOG2106@2759	NA|NA|NA	O
g|tr|g536861.t1	Foraminifera	712	11	GloG15_CONTIG230971:103-585,655-728,788-1001(-)	PSMA5	threonine-type endopeptidase activity	1.86508e+06	1.55951e+06	946859	1.4392e+06	1.8642e+06	2.00418e+06	1.82227e+06	1.96623e+06	2.14958e+06	1.71879e+06	1.02529e+06	899457	1.88121e+06	1.62973e+06	1.92006e+06	1.86672e+06	>g|tr|g536861.t1	130081.XP_005707604.1	5.2e-67	261.2	Eukaryota	GO:0000502,GO:0001775,GO:0002252,GO:0002263,GO:0002274,GO:0002275,GO:0002283,GO:0002366,GO:0002376,GO:0002443,GO:0002444,GO:0002446,GO:0003674,GO:0005488,GO:0005515,GO:0005575,GO:0005576,GO:0005622,GO:0005623,GO:0005634,GO:0005654,GO:0005737,GO:0005829,GO:0005839,GO:0006464,GO:0006508,GO:0006511,GO:0006807,GO:0006810,GO:0006887,GO:0006955,GO:0008150,GO:0008152,GO:0009056,GO:0009057,GO:0009987,GO:…	3.4.25.1	ko:K02729,ko:K12388	ko03050,ko04142,ko04722,ko04979,map03050,map04142,map04722,map04979	M00337,M00340			ko00000,ko00001,ko00002,ko01000,ko01002,ko02000,ko03051	9.A.63.1.3			Eukaryota	COG0638@1,KOG0176@2759	NA|NA|NA	O
g|tr|g537845.t1	Foraminifera	957	8	GloG15_CONTIG231863:752-875,933-1354(+)		Oxidoreductase, 2-nitropropane dioxygenase family	919943	1.03928e+06	614666	776752	949363	2.50045e+06	2.6041e+06	957293	766530	1.05085e+06	743595	872903	1.43898e+06	1.03146e+06	1.147e+06	1.43194e+06	>g|tr|g537845.t1	69781.S7ZDS7	2.3e-72	278.5	Eurotiales												Fungi	20E39@147545,2QTWN@2759,397Z1@33154,3NWW5@4751,3QKGZ@4890,3S2ZP@5042,COG2070@1	NA|NA|NA	E
g|tr|g539567.t1	Foraminifera	765	2	GloG15_CONTIG233372:218-442,513-675,754-1088(+)			4.01556e+06	2.49527e+06	1.92175e+06	2.30534e+06	3.39108e+06	3.48018e+06	2.07493e+06	4.09106e+06	3.68877e+06	4.95514e+06	2.77455e+06	6.53447e+06	2.87938e+06	3.82137e+06	5.28117e+06	4.29033e+06	>g|tr|g539567.t1	46681.XP_001734346.1	2.8e-38	165.6	Amoebozoa	GO:0003674,GO:0003779,GO:0005488,GO:0005509,GO:0005515,GO:0005575,GO:0005622,GO:0005623,GO:0005737,GO:0005856,GO:0005938,GO:0006996,GO:0007010,GO:0007015,GO:0008092,GO:0008150,GO:0009987,GO:0016043,GO:0022607,GO:0030029,GO:0030036,GO:0030046,GO:0030175,GO:0030863,GO:0031143,GO:0042995,GO:0043167,GO:0043169,GO:0043226,GO:0043228,GO:0043229,GO:0043232,GO:0044085,GO:0044424,GO:0044444,GO:0044448,GO:…											Eukaryota	2E18V@1,2S8KW@2759,3X92G@554915	NA|NA|NA
g|tr|g540979.t1	Foraminifera	443	5	GloG15_CONTIG234621:105-613,679-1114,1181-1327(-)		oxidation-reduction process	189150	300293	221176	249118	321443	247714	226041	369756	245624	360967	530817	283473	406238	383927	350706	288948	>g|tr|g540979.t1	130081.XP_005706696.1	5e-71	275.0	Eukaryota												Eukaryota	COG1028@1,KOG0725@2759	NA|NA|NA	IQ
g|tr|g541279.t1	Foraminifera	656	9	GloG15_CONTIG234892:204-490,543-1077(+)	PSMA1	threonine-type endopeptidase activity	1.05552e+06	761337	439711	619095	922353	829894	1.05534e+06	1.16988e+06	1.02339e+06	777266	822608	1.48853e+06	841213	949262	913884	863091	>g|tr|g541279.t1	55529.EKX52104	1.2e-66	260.0	Eukaryota	GO:0000003,GO:0000502,GO:0001530,GO:0001673,GO:0001703,GO:0002682,GO:0002683,GO:0002861,GO:0002862,GO:0003006,GO:0003674,GO:0003676,GO:0003723,GO:0005488,GO:0005515,GO:0005575,GO:0005622,GO:0005623,GO:0005634,GO:0005654,GO:0005737,GO:0005813,GO:0005815,GO:0005829,GO:0005839,GO:0005844,GO:0005856,GO:0005886,GO:0005911,GO:0006464,GO:0006508,GO:0006511,GO:0006807,GO:0006996,GO:0006997,GO:0007088,GO:…	3.4.25.1	ko:K02725,ko:K13141	ko03050,map03050	M00337,M00340			ko00000,ko00001,ko00002,ko01000,ko01002,ko03041,ko03051,ko04147				Eukaryota	COG0638@1,KOG0863@2759	NA|NA|NA	O
g|tr|g541782.t1-g|tr|g892994.t1(76.54%)	Foraminifera	407	3	GloG15_CONTIG619912:97-542,605-647(-)	ACTBL2	cytoskeleton organization	481376	262546	627135	475684	253021	191729	338665	324990	561437	280249	553711	882670	469375	303037	324049	277281	>g|tr|g541782.t1	691883.XP_009496373.1	1.3e-157	562.8	Opisthokonta			ko:K05692	ko04015,ko04145,ko04210,ko04390,ko04391,ko04510,ko04520,ko04530,ko04611,ko04670,ko04714,ko04745,ko04810,ko04919,ko04921,ko05100,ko05110,ko05130,ko05131,ko05132,ko05164,ko05205,ko05225,ko05410,ko05412,ko05414,ko05416,ko05418,map04015,map04145,map04210,map04390,map04391,map04510,map04520,map04530,map04611,map04670,map04714,map04745,map04810,map04919,map04921,map05100,map05110,map05130,map05131,map0…				ko00000,ko00001,ko03019,ko03021,ko03029,ko03036,ko04147,ko04812				Opisthokonta	38C0D@33154,COG5277@1,KOG0676@2759	NA|NA|NA	Z
g|tr|g542728.t1	Foraminifera	992	2	GloG15_CONTIG236225:594-1100(+)		Glyoxalase/Bleomycin resistance protein/Dioxygenase superfamily	281718	337317	207953	301217	381495	311449	438788	291716	214539	389319	124243	11262.1	226853	285392	511846	390458	>g|tr|g542728.t1	10224.XP_002734959.1	1.8e-47	195.7	Bilateria		5.1.99.1	ko:K05606	ko00280,ko00630,ko00640,ko00720,ko01100,ko01120,ko01200,map00280,map00630,map00640,map00720,map01100,map01120,map01200	M00373,M00375,M00376,M00741	R02765,R09979	RC00780,RC02739	ko00000,ko00001,ko00002,ko01000				Metazoa	3A01S@33154,3BPU2@33208,3D7RI@33213,COG0346@1,KOG2944@2759	NA|NA|NA	G
g|tr|g543450.t1	Foraminifera	481	7	GloG15_CONTIG236863:70-1111(+)		Carboxyl transferase domain	1.04385e+06	978239	1.01143e+06	1.04495e+06	1.16831e+06	1.02554e+06	977471	1.44496e+06	1.33115e+06	1.22307e+06	1.00316e+06	1.57116e+06	1.01044e+06	1.26489e+06	821094	950432	>g|tr|g543450.t1	78898.MVEG_11253T0	4e-110	404.8	Fungi incertae sedis												Fungi	1GT2P@112252,38D8D@33154,3NZJP@4751,COG4799@1,KOG0540@2759	NA|NA|NA	EI
g|tr|g545616.t1	Foraminifera	664	1	GloG15_CONTIG238788:24-839(-)		Inosine-uridine preferring nucleoside hydrolase	54735.9	37873.7	80257	17368.7	32968.6	65163.9	9552.11	24136.9	24781.6	59697.8	296.449	43402.9	47775.1	23379.1	38500.2	54746.7	>g|tr|g545616.t1	32057.KB217478_gene1622	2e-24	119.8	Nostocales		3.2.2.1	ko:K01239,ko:K01250,ko:K12700	ko00230,ko00760,ko01100,map00230,map00760,map01100		R01245,R01273,R01677,R01770,R02143	RC00033,RC00063,RC00122,RC00318,RC00485	ko00000,ko00001,ko01000				Bacteria	1G0NI@1117,1HM1K@1161,COG1957@1,COG1957@2	NA|NA|NA	F
g|tr|g548389.t1	Foraminifera	1122	4	GloG15_CONTIG241277:604-606,673-798,887-943,1013-1141(+)	hsp10	Belongs to the GroES chaperonin family	519846	1.57042e+06	892678	1.36238e+06	1.12135e+06	1.43168e+06	1.57926e+06	1.04232e+06	944037	1.46985e+06	594720	459682	1.97317e+06	1.00357e+06	1.13236e+06	1.38445e+06	>g|tr|g548389.t1	430998.XP_007680962.1	8.8e-21	106.3	Dothideomycetidae	GO:0003674,GO:0005488,GO:0005515,GO:0005575,GO:0005622,GO:0005623,GO:0005737,GO:0005739,GO:0005759,GO:0006457,GO:0006458,GO:0006605,GO:0006626,GO:0006810,GO:0006839,GO:0006886,GO:0006950,GO:0006986,GO:0006996,GO:0007005,GO:0008104,GO:0008150,GO:0009987,GO:0010033,GO:0015031,GO:0015833,GO:0016043,GO:0017038,GO:0022607,GO:0030150,GO:0031974,GO:0033036,GO:0033365,GO:0034613,GO:0034622,GO:0035966,GO:…		ko:K04078					ko00000,ko03029,ko03110				Fungi	202G0@147541,3A5MZ@33154,3MM6M@451867,3P5D4@4751,3QW4M@4890,COG0234@1,KOG1641@2759	NA|NA|NA	O
g|tr|g551325.t1	Foraminifera	613	1	GloG15_CONTIG243896:1-891(+)	MA20_39250	Caspase domain	31937.4	203524	314882	283326	189835	125849	317853	46740.4	69708.3	249546	377309	155192	372347	104167	28063.8	111473	>g|tr|g551325.t1	933262.AXAM01000062_gene944	1.9e-81	309.3	Desulfobacterales												Bacteria	1NQ5K@1224,2MIBZ@213118,2WKY9@28221,42MAT@68525,COG1262@1,COG1262@2,COG4249@1,COG4249@2	NA|NA|NA	S
g|tr|g552428.t1	Foraminifera	838	1	GloG15_CONTIG244908:1-251,354-747(-)			240243	463889	342306	339626	298364	265223	186997	222934	348778	560648	203896	213867	436420	294758	290094	539137
g|tr|g555566.t1	Foraminifera	478	2	GloG15_CONTIG247745:1-1044(+)	ABCD3	ABC transporter transmembrane region 2	326322	286233	340175	284707	380899	393440	432969	294665	202610	313489	449209	405427	445058	281708	238571	236902	>g|tr|g555566.t1	5888.CAK77135	1.1e-99	370.2	Ciliophora	GO:0000038,GO:0000166,GO:0003674,GO:0003824,GO:0005215,GO:0005319,GO:0005324,GO:0005488,GO:0005515,GO:0005524,GO:0005575,GO:0005622,GO:0005623,GO:0005737,GO:0005739,GO:0005777,GO:0005778,GO:0005779,GO:0005782,GO:0005829,GO:0005886,GO:0006082,GO:0006629,GO:0006631,GO:0006633,GO:0006635,GO:0006810,GO:0006811,GO:0006820,GO:0006869,GO:0006996,GO:0007031,GO:0008144,GO:0008150,GO:0008152,GO:0008610,GO:…		ko:K05677	ko02010,ko04146,map02010,map04146				ko00000,ko00001,ko02000	3.A.1.203.1			Eukaryota	3ZCXQ@5878,COG4178@1,KOG0060@2759	NA|NA|NA	Q
g|tr|g556659.t1	Foraminifera	484	5	GloG15_CONTIG248766:1-1037(+)	eIF-2gamma	translation initiation factor activity	58097.7	207305	362119	234521	235126	323686	542532	178746	139435	241111	208656	162988	376665	143991	105932	236898	>g|tr|g556659.t1	10224.XP_002733651.1	1.5e-122	446.0	Bilateria	GO:0001731,GO:0002181,GO:0002183,GO:0003674,GO:0003676,GO:0003723,GO:0003743,GO:0005488,GO:0005575,GO:0005622,GO:0005623,GO:0005737,GO:0006412,GO:0006413,GO:0006518,GO:0006807,GO:0008135,GO:0008150,GO:0008152,GO:0009058,GO:0009059,GO:0009987,GO:0010467,GO:0016043,GO:0016282,GO:0019538,GO:0022607,GO:0022613,GO:0022618,GO:0032991,GO:0034622,GO:0034641,GO:0034645,GO:0043043,GO:0043170,GO:0043603,GO:…	2.1.1.43	ko:K03242,ko:K11419	ko00310,ko03013,map00310,map03013		R03875,R03938,R04866,R04867	RC00003,RC00060,RC00181,RC00496	ko00000,ko00001,ko01000,ko03012,ko03036				Metazoa	38FY1@33154,3BHNA@33208,3CURY@33213,COG3276@1,KOG0466@2759	NA|NA|NA	J
g|tr|g557552.t1	Foraminifera	632	1	GloG15_CONTIG249597:379-780,841-1293(+)	mro	Converts alpha-aldose to the beta-anomer	401785	558042	413246	516098	624657	601389	564320	359385	490532	541519	514406	487326	594188	335300	603802	470214	>g|tr|g557552.t1	880073.Calab_0031	1.8e-63	249.6	unclassified Bacteria		5.1.3.3	ko:K01785	ko00010,ko00052,ko01100,ko01110,ko01120,ko01130,map00010,map00052,map01100,map01110,map01120,map01130	M00632	R01602,R10619	RC00563	ko00000,ko00001,ko00002,ko01000				Bacteria	2NQA5@2323,COG2017@1,COG2017@2	NA|NA|NA	G
g|tr|g560222.t1	Foraminifera	767	6	GloG15_CONTIG252024:250-310,361-502,563-1079(+)	ATP6V1E1	V-type proton ATPase subunit E	670284	507193	474396	443270	517966	534247	377603	833536	615297	655854	646752	737646	458240	605022	688083	660887	>g|tr|g560222.t1	400682.PAC_15726557	8.1e-38	164.1	Metazoa	GO:0000041,GO:0000221,GO:0001763,GO:0002009,GO:0003674,GO:0003824,GO:0005215,GO:0005488,GO:0005515,GO:0005575,GO:0005622,GO:0005623,GO:0005737,GO:0005768,GO:0005773,GO:0005774,GO:0005829,GO:0005886,GO:0005902,GO:0006810,GO:0006811,GO:0006812,GO:0006826,GO:0007154,GO:0007165,GO:0007166,GO:0007167,GO:0007169,GO:0007275,GO:0007424,GO:0007430,GO:0008104,GO:0008150,GO:0008286,GO:0008324,GO:0008553,GO:…		ko:K02150	ko00190,ko01100,ko04145,ko04150,ko04721,ko04966,ko05110,ko05120,ko05323,map00190,map01100,map04145,map04150,map04721,map04966,map05110,map05120,map05323	M00160			ko00000,ko00001,ko00002	3.A.2.2			Metazoa	38FW0@33154,3BH96@33208,COG1390@1,KOG1664@2759	NA|NA|NA	C
g|tr|g561145.t1	Foraminifera	761	2	GloG15_CONTIG252885:171-698,751-872,937-1012(-)	GOT1	Glutamic-oxaloacetic transaminase 1	1.82613e+06	1.28641e+06	576900	1.09338e+06	1.47374e+06	1.86675e+06	2.02661e+06	2.37269e+06	1.90907e+06	1.54714e+06	1.33821e+06	209080	1.66565e+06	1.87494e+06	1.8112e+06	1.81297e+06	>g|tr|g561145.t1	7739.XP_002603818.1	7.1e-74	283.9	Chordata	GO:0000323,GO:0003254,GO:0003674,GO:0003824,GO:0004069,GO:0004609,GO:0005488,GO:0005575,GO:0005622,GO:0005623,GO:0005634,GO:0005654,GO:0005737,GO:0005739,GO:0005759,GO:0005764,GO:0005773,GO:0005777,GO:0005829,GO:0005975,GO:0005996,GO:0006006,GO:0006066,GO:0006071,GO:0006082,GO:0006094,GO:0006103,GO:0006106,GO:0006107,GO:0006114,GO:0006520,GO:0006531,GO:0006532,GO:0006533,GO:0006536,GO:0006537,GO:…	2.6.1.1	ko:K14454	ko00220,ko00250,ko00270,ko00330,ko00350,ko00360,ko00400,ko00710,ko00950,ko00960,ko01100,ko01110,ko01120,ko01130,ko01200,ko01210,ko01230,map00220,map00250,map00270,map00330,map00350,map00360,map00400,map00710,map00950,map00960,map01100,map01110,map01120,map01130,map01200,map01210,map01230	M00170,M00171	R00355,R00694,R00734,R00896,R02433,R02619,R05052	RC00006	ko00000,ko00001,ko00002,ko01000,ko01007,ko04131,ko04147				Metazoa	39W2P@33154,3BE99@33208,3CZIY@33213,485GJ@7711,COG1448@1,KOG1412@2759	NA|NA|NA	E
g|tr|g564712.t1	Foraminifera	996	1	GloG15_CONTIG256122:660-1072,1149-1239(-)		F-actin-capping protein subunit beta. Source PGD	2.08069e+06	1.96424e+06	666927	1.19639e+06	1.63654e+06	1.44259e+06	1.96651e+06	1.91591e+06	2.20372e+06	1.45343e+06	2.4001e+06	2.40362e+06	1.58268e+06	2.16855e+06	1.63511e+06	1.75943e+06	>g|tr|g564712.t1	42099.EPrPV00000022419	1.5e-22	112.8	Pythiales	GO:0000902,GO:0003674,GO:0003779,GO:0005488,GO:0005515,GO:0005575,GO:0005622,GO:0005623,GO:0005856,GO:0005884,GO:0006950,GO:0006996,GO:0007010,GO:0007015,GO:0008064,GO:0008092,GO:0008150,GO:0008290,GO:0009266,GO:0009408,GO:0009628,GO:0009653,GO:0009987,GO:0010639,GO:0015629,GO:0016043,GO:0030029,GO:0030036,GO:0030832,GO:0030833,GO:0030834,GO:0030835,GO:0030837,GO:0031333,GO:0032271,GO:0032272,GO:…		ko:K10365	ko04144,map04144				ko00000,ko00001,ko04131,ko04147,ko04812				Eukaryota	1MG74@121069,KOG3174@1,KOG3174@2759	NA|NA|NA	Z
g|tr|g566491.t1	Foraminifera	404	3	GloG15_CONTIG257776:1-74,131-1039,1093-1267(+)	ACO2	Aconitate hydratase, mitochondrial	93810.5	484312	26107.2	294768	379119	407187	614248	201399	139706	263695	70526.9	117424	449042	180045	203454	284873	>g|tr|g566491.t1	65071.PYU1_T000591	5.9e-147	527.3	Pythiales	GO:0000002,GO:0001889,GO:0003674,GO:0003676,GO:0003677,GO:0003690,GO:0003697,GO:0003824,GO:0003994,GO:0005488,GO:0005506,GO:0005575,GO:0005576,GO:0005622,GO:0005623,GO:0005737,GO:0005739,GO:0005759,GO:0005829,GO:0006082,GO:0006091,GO:0006099,GO:0006101,GO:0006102,GO:0006520,GO:0006536,GO:0006807,GO:0006950,GO:0006996,GO:0007005,GO:0007275,GO:0008150,GO:0008152,GO:0008198,GO:0009060,GO:0009064,GO:…	4.2.1.3	ko:K01681	ko00020,ko00630,ko00720,ko01100,ko01110,ko01120,ko01130,ko01200,ko01210,ko01230,map00020,map00630,map00720,map01100,map01110,map01120,map01130,map01200,map01210,map01230	M00009,M00010,M00012,M00173,M00740	R01324,R01325,R01900	RC00497,RC00498,RC00618	br01601,ko00000,ko00001,ko00002,ko01000			iMM904.YLR304C,iND750.YLR304C	Eukaryota	1MDC0@121069,COG1048@1,KOG0453@2759	NA|NA|NA	CE
g|tr|g566576.t1	Foraminifera	437	2	GloG15_CONTIG257851:95-482,550-1267(+)		ornithine carbamoyltransferase activity	608111	752573	508121	816701	528221	508811	273458	1.08009e+06	719897	681143	280968	894883	283125	792813	694093	784356	>g|tr|g566576.t1	227086.JGI_V11_46835	5.9e-88	331.3	Eukaryota		2.1.3.3	ko:K00611	ko00220,ko01100,ko01110,ko01130,ko01230,map00220,map01100,map01110,map01130,map01230	M00029,M00844	R01398	RC00096	ko00000,ko00001,ko00002,ko01000				Eukaryota	COG0448@1,KOG1504@2759	NA|NA|NA	G
g|tr|g567356.t1	Foraminifera	657	2	GloG15_CONTIG258579:227-595,653-1105(-)		ATPase activity, coupled to transmembrane movement of substances	65197.9	192020	151837	158042	213134	136311	139115	207442	213181	355209	100350	359790	230675	149375	105116	125534	>g|tr|g567356.t1	45351.EDO41280	3.6e-50	205.3	Metazoa	GO:0005575,GO:0006873,GO:0006885,GO:0008150,GO:0009987,GO:0016020,GO:0016469,GO:0019725,GO:0030003,GO:0030004,GO:0030641,GO:0032991,GO:0033176,GO:0042592,GO:0044425,GO:0048878,GO:0050801,GO:0051453,GO:0055067,GO:0055080,GO:0055082,GO:0065007,GO:0065008,GO:0098771,GO:0098796		ko:K02149	ko00190,ko01100,ko04145,ko04150,ko04721,ko04966,ko05110,ko05120,ko05323,map00190,map01100,map04145,map04150,map04721,map04966,map05110,map05120,map05323	M00160			ko00000,ko00001,ko00002	3.A.2.2			Metazoa	38FM4@33154,3B9JP@33208,COG1394@1,KOG1647@2759	NA|NA|NA	C
g|tr|g567958.t1	Foraminifera	1029	1	GloG15_CONTIG259145:358-525,921-1217(-)			49860.9	202237	161166	207257	140991	98535	152220	155655	152735	292155	34648.6	15459.5	132041	172763	25806.9	130985
g|tr|g568433.t1-g|tr|g553729.t1(77.87%)	Foraminifera	692	7	GloG15_CONTIG259576:8-407,469-596,656-914(-)	ACAA1	Thiolase, N-terminal domain	205959	1.07877e+06	601960	867495	650075	672821	1.20552e+06	660555	537483	1.06747e+06	944755	826219	1.17604e+06	680852	361747	731194	>g|tr|g568433.t1	164328.Phyra71887	5.9e-74	284.3	Peronosporales	GO:0000038,GO:0001676,GO:0001775,GO:0002252,GO:0002263,GO:0002274,GO:0002275,GO:0002283,GO:0002366,GO:0002376,GO:0002443,GO:0002444,GO:0002446,GO:0003674,GO:0003676,GO:0003723,GO:0003729,GO:0003824,GO:0003985,GO:0003988,GO:0003997,GO:0005488,GO:0005575,GO:0005576,GO:0005622,GO:0005623,GO:0005737,GO:0005739,GO:0005740,GO:0005758,GO:0005777,GO:0005782,GO:0005829,GO:0006082,GO:0006605,GO:0006625,GO:…	2.3.1.16	ko:K02985,ko:K07513	ko00071,ko00280,ko00592,ko01040,ko01100,ko01110,ko01130,ko01212,ko03010,ko03320,ko04146,map00071,map00280,map00592,map01040,map01100,map01110,map01130,map01212,map03010,map03320,map04146	M00087,M00113,M00177	R00927,R01177,R03778,R03858,R03991,R04546,R04742,R04747,R07891,R07895,R07899,R07937,R07953	RC00004,RC00326,RC00405,RC01702,RC02728	br01610,ko00000,ko00001,ko00002,ko01000,ko03011				Eukaryota	3QEZ1@4776,COG0183@1,KOG1389@2759	NA|NA|NA	I
g|tr|g572625.t1-g|tr|g483377.t1(76.09%)	Foraminifera	713	4	GloG15_CONTIG263450:215-283,352-510,585-986,1044-1184(+)		Aminotransferase class I and II	1.66976e+06	1.29888e+06	908431	1.0447e+06	1.54552e+06	1.91762e+06	2.3596e+06	1.85326e+06	1.81002e+06	1.74421e+06	1.24588e+06	756971	2.09083e+06	1.08429e+06	1.65203e+06	1.74318e+06	>g|tr|g572625.t1	3067.XP_002954714.1	9.9e-58	230.3	Chlorophyta	GO:0003674,GO:0003824,GO:0004069,GO:0005488,GO:0005507,GO:0005575,GO:0005618,GO:0005622,GO:0005623,GO:0005737,GO:0005773,GO:0005774,GO:0005777,GO:0005829,GO:0005886,GO:0005911,GO:0006082,GO:0006091,GO:0006099,GO:0006101,GO:0006103,GO:0006520,GO:0006522,GO:0006531,GO:0006536,GO:0006807,GO:0007275,GO:0007568,GO:0008150,GO:0008152,GO:0008483,GO:0009060,GO:0009064,GO:0009066,GO:0009078,GO:0009506,GO:…	2.6.1.1	ko:K14454	ko00220,ko00250,ko00270,ko00330,ko00350,ko00360,ko00400,ko00710,ko00950,ko00960,ko01100,ko01110,ko01120,ko01130,ko01200,ko01210,ko01230,map00220,map00250,map00270,map00330,map00350,map00360,map00400,map00710,map00950,map00960,map01100,map01110,map01120,map01130,map01200,map01210,map01230	M00170,M00171	R00355,R00694,R00734,R00896,R02433,R02619,R05052	RC00006	ko00000,ko00001,ko00002,ko01000,ko01007,ko04131,ko04147				Viridiplantae	34K5W@3041,37P2V@33090,COG1448@1,KOG1411@2759	NA|NA|NA	E
g|tr|g573224.t1	Foraminifera	1040	2	GloG15_CONTIG263995:760-1215(-)	Pgk	Phosphoglycerate kinase activity. It is involved in the biological process described with glycolytic process	458706	564333	388153	449575	556340	535450	480611	613076	511050	684811	181822	69072.1	651517	251012	496382	529043	>g|tr|g573224.t1	7370.XP_005175895.1	1.1e-43	183.0	Diptera	GO:0000166,GO:0000768,GO:0003674,GO:0003824,GO:0004618,GO:0005488,GO:0005524,GO:0005575,GO:0005622,GO:0005623,GO:0005737,GO:0005975,GO:0006082,GO:0006090,GO:0006091,GO:0006096,GO:0006139,GO:0006163,GO:0006164,GO:0006165,GO:0006725,GO:0006732,GO:0006733,GO:0006753,GO:0006754,GO:0006757,GO:0006793,GO:0006796,GO:0006807,GO:0006949,GO:0007154,GO:0007267,GO:0007268,GO:0007520,GO:0007525,GO:0008144,GO:…	2.7.2.3	ko:K00927	ko00010,ko00710,ko01100,ko01110,ko01120,ko01130,ko01200,ko01230,map00010,map00710,map01100,map01110,map01120,map01130,map01200,map01230	M00001,M00002,M00003,M00165,M00166,M00308,M00552	R01512	RC00002,RC00043	ko00000,ko00001,ko00002,ko01000,ko04147				Arthropoda	38EF9@33154,3BE59@33208,3CT3V@33213,3SGSE@50557,41WKZ@6656,450G1@7147,COG0126@1,KOG1367@2759	NA|NA|NA	G
g|tr|g574463.t1	Foraminifera	449	1	GloG15_CONTIG265156:1-718,784-1150(-)		Belongs to the NDK family	484844	560967	570846	653084	496283	525996	773103	617188	852013	493650	640201	220174	873027	945588	902296	818318	>g|tr|g574463.t1	109760.SPPG_06597T0	2.5e-70	272.7	Fungi												Fungi	38GKU@33154,3Q6M1@4751,COG0105@1,COG0526@1,KOG0888@2759,KOG0907@2759	NA|NA|NA	FO
g|tr|g575018.t1-g|tr|g214332.t1(73.98%)	Foraminifera	575	4	GloG15_CONTIG265680:319-1243(+)		actin filament severing	504374	1.94167e+06	2.10918e+06	1.80315e+06	1.36654e+06	946706	1.61526e+06	1.17457e+06	1.00736e+06	1.70258e+06	1.86341e+06	2.31418e+06	1.31612e+06	1.78604e+06	713368	1.2484e+06	>g|tr|g575018.t1	400682.PAC_15713497	9.4e-63	247.3	Metazoa	GO:0003674,GO:0003779,GO:0003785,GO:0005488,GO:0005515,GO:0005543,GO:0005546,GO:0006996,GO:0007010,GO:0007015,GO:0008064,GO:0008092,GO:0008150,GO:0008154,GO:0008289,GO:0009987,GO:0010639,GO:0016043,GO:0022411,GO:0030029,GO:0030036,GO:0030042,GO:0030832,GO:0030833,GO:0030834,GO:0030835,GO:0030837,GO:0031333,GO:0032271,GO:0032272,GO:0032535,GO:0032956,GO:0032970,GO:0032984,GO:0033043,GO:0035091,GO:…		ko:K05768	ko04666,ko04810,ko05203,map04666,map04810,map05203				ko00000,ko00001,ko04147,ko04812				Metazoa	38BDF@33154,3B9RZ@33208,KOG0443@1,KOG0443@2759	NA|NA|NA	Z
g|tr|g579004.t1	Foraminifera	867	2	GloG15_CONTIG269390:1-290,377-708(-)			34433	271983	217686	289528	147668	109887	285300	81691.9	118859	224100	378836	460052	251201	100497	64718.1	104186
g|tr|g581388.t1	Foraminifera	494	1	GloG15_CONTIG271622:1-794,995-1226(-)		Ubiquitin-activating enzyme E1	1.00242e+06	1.46262e+06	632822	1.23293e+06	1.2858e+06	980836	1.63945e+06	1.25755e+06	2.621e+06	1.42758e+06	188032	74168.4	1.6568e+06	557185	972908	639112	>g|tr|g581388.t1	5911.EAR98973	7.5e-29	134.8	Ciliophora	GO:0003674,GO:0003824,GO:0004839,GO:0005575,GO:0005622,GO:0005623,GO:0005634,GO:0005654,GO:0005737,GO:0005739,GO:0005829,GO:0006464,GO:0006508,GO:0006511,GO:0006807,GO:0006950,GO:0006974,GO:0008150,GO:0008152,GO:0008641,GO:0009056,GO:0009057,GO:0009987,GO:0016567,GO:0016874,GO:0016877,GO:0019538,GO:0019941,GO:0030163,GO:0031974,GO:0031981,GO:0032446,GO:0033554,GO:0036211,GO:0043170,GO:0043226,GO:…	6.2.1.45	ko:K03178	ko04120,ko05012,map04120,map05012				ko00000,ko00001,ko01000,ko04121,ko04147				Eukaryota	3ZB3J@5878,COG0476@1,KOG2012@2759	NA|NA|NA	O
g|tr|g581542.t1	Foraminifera	462	1	GloG15_CONTIG271775:1-1069(+)	GntI	Alpha-1,3-mannosyl-glycoprotein	9149.95	17988	15876.2	22126.1	10882.5	17658.7	16346.6	11183	11515.3	12182	25758.6	403.703	20070.2	12780.6	2118.61	13220.2	>g|tr|g581542.t1	3659.XP_004144889.1	2.1e-66	259.6	fabids	GO:0003674,GO:0003824,GO:0003827,GO:0005575,GO:0005622,GO:0005623,GO:0005737,GO:0005768,GO:0005794,GO:0005802,GO:0006464,GO:0006486,GO:0006491,GO:0006807,GO:0006950,GO:0006970,GO:0006972,GO:0008150,GO:0008152,GO:0008194,GO:0008375,GO:0009058,GO:0009059,GO:0009100,GO:0009101,GO:0009628,GO:0009987,GO:0012505,GO:0016262,GO:0016740,GO:0016757,GO:0016758,GO:0019538,GO:0031410,GO:0031982,GO:0031984,GO:…	2.4.1.101	ko:K00726	ko00510,ko00513,ko01100,map00510,map00513,map01100		R05983		ko00000,ko00001,ko01000,ko01003		GT13		Viridiplantae	37Q62@33090,3GAMY@35493,4JN6R@91835,KOG1413@1,KOG1413@2759	NA|NA|NA	G
g|tr|g582939.t1	Foraminifera	549	2	GloG15_CONTIG273074:1-808,1016-1044,1108-1222(-)	ILS1	Belongs to the class-I aminoacyl-tRNA synthetase family	79175.2	433350	119020	422166	260459	314215	240158	332908	211703	324831	107911	54897.4	269659	292532	156491	253116	>g|tr|g582939.t1	148960.XP_006959650.1	1.4e-109	402.9	Basidiomycota	GO:0000166,GO:0002181,GO:0003674,GO:0003824,GO:0004812,GO:0004822,GO:0005488,GO:0005524,GO:0005575,GO:0005622,GO:0005623,GO:0005737,GO:0005829,GO:0006082,GO:0006139,GO:0006399,GO:0006412,GO:0006418,GO:0006428,GO:0006518,GO:0006520,GO:0006725,GO:0006807,GO:0008144,GO:0008150,GO:0008152,GO:0009058,GO:0009059,GO:0009987,GO:0010467,GO:0016070,GO:0016874,GO:0016875,GO:0017076,GO:0019538,GO:0019752,GO:…	6.1.1.5	ko:K01870	ko00970,map00970	M00359,M00360	R03656	RC00055,RC00523	ko00000,ko00001,ko00002,ko01000,ko01007,ko03016				Fungi	38CIS@33154,3NVSZ@4751,3UY5D@5204,COG0060@1,KOG0434@2759	NA|NA|NA	J
g|tr|g584407.t1	Foraminifera	772	1	GloG15_CONTIG274425:127-440,509-911(+)	HIBCH	3-hydroxyisobutyryl-CoA hydrolase	166590	117848	119733	112745	98994.8	168848	206125	161974	111324	141989	85002.9	225654	168157	87949	157664	164963	>g|tr|g584407.t1	9361.ENSDNOP00000007715	1.6e-54	219.5	Mammalia	GO:0003674,GO:0003824,GO:0003860,GO:0005575,GO:0005622,GO:0005623,GO:0005737,GO:0005739,GO:0005759,GO:0006082,GO:0006520,GO:0006807,GO:0008150,GO:0008152,GO:0009056,GO:0009063,GO:0009081,GO:0009083,GO:0009987,GO:0016054,GO:0016289,GO:0016787,GO:0016788,GO:0016790,GO:0019752,GO:0031974,GO:0043226,GO:0043227,GO:0043229,GO:0043231,GO:0043233,GO:0043436,GO:0044237,GO:0044238,GO:0044248,GO:0044281,GO:…	3.1.2.4	ko:K05605	ko00280,ko00410,ko00640,ko01100,ko01200,map00280,map00410,map00640,map01100,map01200	M00013	R03158,R05064	RC00004,RC00014,RC00137	ko00000,ko00001,ko00002,ko01000				Mammalia	38EBG@33154,3BDAT@33208,3CYSP@33213,3JCSI@40674,48211@7711,4920N@7742,COG1024@1,KOG1684@2759	NA|NA|NA	I
g|tr|g584537.t1	Foraminifera	718	1	GloG15_CONTIG274539:247-908,1118-1218(+)	SLC25A42	Mitochondrial coenzyme A transporter SLC25A42-like	1.38266e+06	1.40066e+06	1.10555e+06	1.56453e+06	1.20666e+06	1.15442e+06	1.53505e+06	1.18138e+06	1.1398e+06	1.1832e+06	906337	1.89684e+06	1.15371e+06	1.32672e+06	1.03532e+06	1.23447e+06	>g|tr|g584537.t1	215358.XP_010728912.1	6.6e-22	111.3	Actinopterygii	GO:0000295,GO:0003674,GO:0003824,GO:0005215,GO:0005346,GO:0005347,GO:0005575,GO:0005622,GO:0005623,GO:0005737,GO:0005739,GO:0005740,GO:0005743,GO:0006810,GO:0006811,GO:0006812,GO:0006820,GO:0006839,GO:0006855,GO:0006862,GO:0006996,GO:0007005,GO:0007006,GO:0008150,GO:0008324,GO:0008509,GO:0008514,GO:0009987,GO:0015075,GO:0015101,GO:0015215,GO:0015216,GO:0015217,GO:0015228,GO:0015238,GO:0015291,GO:…		ko:K15085					ko00000,ko02000	2.A.29.12.2			Metazoa	39FP7@33154,3BBHJ@33208,3CWDP@33213,48HTY@7711,49G52@7742,4A73A@7898,KOG0752@1,KOG0752@2759	NA|NA|NA	C
g|tr|g584606.t1	Foraminifera	617	1	GloG15_CONTIG274602:117-317,387-764,833-1132(-)	CAPZA2	barbed-end actin filament capping	826441	779291	358065	622630	866488	742899	891599	1.45229e+06	1.00884e+06	826742	871639	474536	920210	1.20769e+06	897648	1.01594e+06	>g|tr|g584606.t1	227086.JGI_V11_84922	9e-31	141.0	Eukaryota	GO:0000003,GO:0000278,GO:0000281,GO:0000902,GO:0000910,GO:0000912,GO:0000915,GO:0000916,GO:0001669,GO:0001709,GO:0001932,GO:0001933,GO:0002376,GO:0002478,GO:0002495,GO:0002504,GO:0003006,GO:0003674,GO:0003779,GO:0005488,GO:0005515,GO:0005575,GO:0005576,GO:0005622,GO:0005623,GO:0005737,GO:0005829,GO:0005856,GO:0005869,GO:0005875,GO:0005884,GO:0005886,GO:0005903,GO:0005911,GO:0005933,GO:0005934,GO:…	1.2.4.4	ko:K00167,ko:K03065,ko:K10364,ko:K14842	ko00280,ko00640,ko01100,ko01110,ko01130,ko03050,ko04144,ko05169,map00280,map00640,map01100,map01110,map01130,map03050,map04144,map05169	M00036,M00341	R07599,R07600,R07601,R07602,R07603,R07604,R10996,R10997	RC00027,RC00627,RC02743,RC02883,RC02949,RC02953	br01601,ko00000,ko00001,ko00002,ko01000,ko03009,ko03051,ko04131,ko04147,ko04812				Eukaryota	KOG0836@1,KOG0836@2759	NA|NA|NA	O
g|tr|g584927.t1	Foraminifera	546	5	GloG15_CONTIG274900:137-653,719-1155(-)		Belongs to the mitochondrial carrier (TC 2.A.29) family	722589	758504	1.29946e+06	987450	761640	1.34206e+06	1.09971e+06	760403	732799	1.06128e+06	522766	550426	804151	767761	1.10387e+06	1.03124e+06	>g|tr|g584927.t1	29176.XP_003886301.1	2.7e-81	308.9	Sarcocystidae			ko:K15102					ko00000,ko02000,ko04147	2.A.29.4			Apicomplexa	3Y9WV@5794,3YIT5@5796,3YQMC@5809,KOG0767@1,KOG0767@2759	NA|NA|NA	C
[truncated: 585 more rows]

## Sheet: Table S6) all DAPs
									Supplementary Material
									Divergent proteomic responses offer insights into resistant physiological responses of a reef-foraminifera to climate change scenarios
[truncated: 198 more rows]
[truncated: 56 more columns]

## Sheet: Table 3) all 'regulated' DAPs
GOs including the word:									Protein description	Accessions		normalized abundance values																log2(FC)											Tukeys' HSD post-hoc test p-values										log2-fold changes
[truncated: 115 more rows]
[truncated: 56 more columns]
